# Supplementary material for: The Arabidopsis ATP-Binding Cassette E protein ABCE2 is a conserved component of the translation machinery
Source: Front Plant Sci. 2022 Oct 17;13:1009895. doi: 10.3389/fpls.2022.1009895 (PMC9618717; doi:10.3389/fpls.2022.1009895)
Supplement: Supplementary file 1 [file DataSheet_1.xlsx]

## Sheet: Supplementary Data Set 1A
Supplementary Data Set 1. Proteins identified in an ABCE2:YFP co-immunoprecipitation assay
Supplementary Data Set 1A. Proteins identified in replicate 1
Protein	Description	Molecular weight (Da)	pI	Protein score	Peptide spectrum matches (PSMs)	Peptides	Exponentially modified protein abundance index (emPAI)	Coverage (%)
AT4G19210.1	| RNAse l inhibitor protein 2 | Chr4:10501906-10504776 FORWARD LENGTH=605 | 201606	69202	8.21	4192.22	171	57	24.76	66
AT5G02500.1	| heat shock cognate protein 70-1 | Chr5:554055-556334 REVERSE LENGTH=651 | 201606	71712	5.03	3688.23	101	51	11.13	61.9
AT1G13440.1	| glyceraldehyde-3-phosphate dehydrogenase C2 | Chr1:4608465-4610494 REVERSE LENGTH=338 | 201606	37004	6.67	2640.3	97	39	49.48	85.2
AT5G56010.1	| heat shock protein 81-3 | Chr5:22681410-22683911 FORWARD LENGTH=699 | 201606	80287	4.95	3738.78	94	54	13.1	49.8
AT5G56030.1	| heat shock protein 81-2 | Chr5:22686923-22689433 FORWARD LENGTH=699 | 201606	80299	4.95	3679.49	92	53	13.1	49.6
AT3G04120.1	| glyceraldehyde-3-phosphate dehydrogenase C subunit 1 | Chr3:1081077-1083131 FORWARD LENGTH=338 | 201606	37005	6.62	2435.14	92	37	39.34	83.7
AT3G09440.1	| Heat shock protein 70 (Hsp 70) family protein | Chr3:2903434-2905632 REVERSE LENGTH=649 | 201606	71559	4.97	3049.42	90	42	8.1	56.4
AT5G14740.2	| carbonic anhydrase 2 | Chr5:4760536-4762382 FORWARD LENGTH=259 | 201606	28668	5.36	2438.24	90	33	64.48	81.5
AT5G56000.1	| HEAT SHOCK PROTEIN 81.4 | Chr5:22677602-22680067 REVERSE LENGTH=699 | 201606	80376	4.96	2863.54	79	41	5.8	39.1
ATCG00490.1	| ribulose-bisphosphate carboxylase | ChrC:54958-56397 FORWARD LENGTH=479 | 201606	53435	5.88	2294.8	77	38	12.03	47.8
AT3G12580.1	| heat shock protein 70 | Chr3:3991487-3993689 REVERSE LENGTH=650 | 201606	71456	5.14	2477.28	75	35	4.41	42.3
AT5G02490.1	| Heat shock protein 70 (Hsp 70) family protein | Chr5:550296-552565 REVERSE LENGTH=653 | 201606	71741	5.03	2452.31	75	34	4.38	46.2
AT5G62690.1	| tubulin beta chain 2 | Chr5:25181560-25183501 FORWARD LENGTH=450 | 201606	51385	4.7	1771.51	70	25	5.95	55.6
AT2G39730.2	| rubisco activase | Chr2:16571046-16573345 REVERSE LENGTH=446 | 201606	49354	7.55	2095.53	69	30	7.89	55.8
AT2G39730.1	| rubisco activase | Chr2:16570951-16573345 REVERSE LENGTH=474 | 201606	52347	5.87	2075.4	68	29	6.86	55.1
C_GFP|eGFP	from pK7FWG2	27039	5.58	1677.31	68	22	20.06	66.9
ATCG00480.1	| ATP synthase subunit beta | ChrC:52660-54156 REVERSE LENGTH=498 | 201606	53957	5.38	2334.85	67	34	9.88	66.3
AT5G23860.1	| tubulin beta 8 | Chr5:8042962-8044528 FORWARD LENGTH=449 | 201606	51258	4.73	1648.29	66	24	5.44	51.2
AT1G20010.1	| tubulin beta-5 chain | Chr1:6938033-6940481 REVERSE LENGTH=449 | 201606	50880	4.66	1548.72	66	23	4.12	43
AT3G01500.1	| carbonic anhydrase 1 | Chr3:194853-196716 REVERSE LENGTH=270 | 201606	29827	5.54	1760.7	65	24	23.11	78.1
AT3G26650.1	| glyceraldehyde 3-phosphate dehydrogenase A subunit | Chr3:9795226-9796848 FORWARD LENGTH=396 | 201606	42748	7.62	1698.34	64	22	7.46	56.8
AT1G56410.1	| heat shock protein 70 (Hsp 70) family protein | Chr1:21117147-21119241 FORWARD LENGTH=617 | 201606	68656	5.22	1883.37	63	24	2.57	34.2
AT2G29550.1	| tubulin beta-7 chain | Chr2:12644258-12645932 REVERSE LENGTH=449 | 201606	51341	4.74	1514.37	63	22	4.92	51
AT5G44340.1	| tubulin beta chain 4 | Chr5:17859442-17860994 REVERSE LENGTH=444 | 201606	50361	4.76	1564.77	63	22	5.13	49.3
AT1G75780.1	| tubulin beta-1 chain | Chr1:28451378-28453602 REVERSE LENGTH=447 | 201606	50755	4.68	1360.26	61	22	3.74	38.5
AT4G20890.1	| tubulin beta-9 chain | Chr4:11182218-11183840 FORWARD LENGTH=444 | 201606	50310	4.69	1430.28	60	20	4.66	49.3
AT5G12250.1	| beta-6 tubulin | Chr5:3961317-3962971 REVERSE LENGTH=449 | 201606	51237	4.72	1371.54	59	22	3.66	35
AT3G13920.1	| eukaryotic translation initiation factor 4A1 | Chr3:4592635-4594128 REVERSE LENGTH=412 | 201606	46960	5.47	2066.19	54	30	11.98	76
AT1G54270.1	| eif4a-2 | Chr1:20260495-20262018 FORWARD LENGTH=412 | 201606	47075	5.45	2117.58	53	30	13.09	79.6
AT3G08530.1	| Clathrin%2C heavy chain | Chr3:2587171-2595411 REVERSE LENGTH=1703 | 201606	194402	5.25	2679.75	52	44	1.99	36.4
AT5G17920.1	| Cobalamin-independent synthase family protein | Chr5:5935771-5939195 FORWARD LENGTH=765 | 201606	84646	6.09	2450.3	52	36	4.32	51.5
AT1G42970.1	| glyceraldehyde-3-phosphate dehydrogenase B subunit | Chr1:16127552-16129584 FORWARD LENGTH=447 | 201606	48086	6.33	1867.1	52	25	5.13	47.9
AT1G12900.1	| glyceraldehyde 3-phosphate dehydrogenase A subunit 2 | Chr1:4392634-4394283 REVERSE LENGTH=399 | 201606	43105	8.16	1554.39	52	19	5.23	48.1
AT1G07920.1	| GTP binding Elongation factor Tu family protein | Chr1:2455559-2457001 FORWARD LENGTH=449 | 201606	49813	9.19	1586.17	51	27	7.03	47.2
AT5G50920.1	| CLPC homologue 1 | Chr5:20715710-20719800 REVERSE LENGTH=929 | 201606	103616	6.36	2495.7	49	41	5.12	49.3
AT3G12780.1	| phosphoglycerate kinase 1 | Chr3:4061127-4063140 REVERSE LENGTH=481 | 201606	50195	5.91	1957.02	49	28	6.92	64
AT3G11130.1	| Clathrin%2C heavy chain | Chr3:3482575-3491667 REVERSE LENGTH=1705 | 201606	194433	5.26	2448.59	48	40	1.86	35.1
AT3G60750.1	| Transketolase | Chr3:22454004-22456824 FORWARD LENGTH=741 | 201606	80374	5.94	1943.05	48	28	3.05	43
AT1G56070.1	| Ribosomal protein S5/Elongation factor G/III/V family protein | Chr1:20968245-20971077 REVERSE LENGTH=843 | 201606	94743	5.89	2272.14	47	34	4.31	46.1
AT4G20360.1	| RAB GTPase homolog E1B | Chr4:10990036-10991466 FORWARD LENGTH=476 | 201606	51883	5.84	1911.26	46	26	7.7	60.3
AT1G12900.2	| glyceraldehyde 3-phosphate dehydrogenase A subunit 2 | Chr1:4392634-4393747 REVERSE LENGTH=317 | 201606	34539	6.17	1262.69	46	16	5.04	45.7
AT4G13940.1	| S-adenosyl-L-homocysteine hydrolase | Chr4:8054931-8056676 FORWARD LENGTH=485 | 201606	53971	5.66	1768.19	45	27	7	67.2
ATCG00120.1	| ATP synthase subunit alpha | ChrC:9938-11461 REVERSE LENGTH=507 | 201606	55351	5.19	1691.82	45	24	3.83	37.7
AT1G55490.1	| chaperonin 60 beta | Chr1:20715717-20718673 REVERSE LENGTH=600 | 201606	64169	6.21	1991.09	42	31	5.99	55.8
AT4G14960.2	| Tubulin/FtsZ family protein | Chr4:8548769-8550319 REVERSE LENGTH=450 | 201606	50191	4.93	1924.55	42	29	6.29	58.4
AT1G04820.1	| tubulin alpha-4 chain | Chr1:1356421-1358266 REVERSE LENGTH=450 | 201606	50194	4.93	1953.08	41	28	6.92	58.4
AT5G19770.1	| tubulin alpha-3 | Chr5:6682761-6684474 REVERSE LENGTH=450 | 201606	50250	4.95	1928.85	40	29	6.88	52.4
AT3G13470.1	| TCP-1/cpn60 chaperonin family protein | Chr3:4389685-4392624 FORWARD LENGTH=596 | 201606	63702	5.6	1800.05	39	28	4.83	54.9
AT1G67090.1	| ribulose bisphosphate carboxylase small chain 1A | Chr1:25048465-25049249 REVERSE LENGTH=180 | 201606	20488	7.59	1063.61	38	19	23.57	60
AT5G52640.1	| heat shock-like protein | Chr5:21352557-21355147 FORWARD LENGTH=700 | 201606	80870	4.97	981.83	38	15	1.4	20
AT2G21390.1	| Coatomer%2C alpha subunit | Chr2:9152428-9156577 FORWARD LENGTH=1218 | 201606	137407	6.45	2078.06	37	33	1.89	36.2
AT3G48870.1	| Clp ATPase | Chr3:18122363-18126008 REVERSE LENGTH=952 | 201606	105902	6.06	1906.89	37	31	2.97	39.1
AT3G52930.1	| Aldolase superfamily protein | Chr3:19627383-19628874 REVERSE LENGTH=358 | 201606	38858	6.05	1822.31	36	25	8.39	71.8
AT5G38410.1	| Ribulose bisphosphate carboxylase (small chain) family protein | Chr5:15377501-15378306 REVERSE LENGTH=181 | 201606	20556	8.22	796.27	34	14	15.47	54.1
AT2G28000.1	| chaperonin-60alpha | Chr2:11926603-11929184 FORWARD LENGTH=586 | 201606	62205	5.09	1884.64	33	25	4.32	51.7
AT1G56190.2	| Phosphoglycerate kinase family protein | Chr1:21028622-21030454 FORWARD LENGTH=405 | 201606	42703	5.39	1215.24	33	18	4.21	56.8
AT3G23810.1	| S-adenosyl-l-homocysteine (SAH) hydrolase 2 | Chr3:8588013-8589671 REVERSE LENGTH=485 | 201606	53809	5.49	1446.31	32	23	4.46	51.8
AT5G38430.1	| Ribulose bisphosphate carboxylase (small chain) family protein | Chr5:15384350-15385155 REVERSE LENGTH=181 | 201606	20558	7.59	599.75	31	12	12.48	63.5
AT3G03780.1	| methionine synthase 2 | Chr3:957602-960740 FORWARD LENGTH=765 | 201606	84873	6.09	1483.42	30	22	2.09	36.2
AT3G44110.1	| DNAJ homologue 3 | Chr3:15869115-15871059 REVERSE LENGTH=420 | 201606	47042	5.76	964.7	30	16	2.75	36.9
AT5G22060.1	| DNAJ homologue 2 | Chr5:7303798-7305668 REVERSE LENGTH=419 | 201606	47036	6.69	959.93	30	16	2.75	31
AT1G62020.1	| Coatomer%2C alpha subunit | Chr1:22919814-22923728 FORWARD LENGTH=1216 | 201606	137563	6.51	1496.19	29	26	1.64	30.1
AT1G72730.1	| DEA(D/H)-box RNA helicase family protein | Chr1:27378040-27379593 REVERSE LENGTH=414 | 201606	47083	5.16	1157.33	29	16	3.48	50
AT1G79930.1	| heat shock protein 91 | Chr1:30063781-30067067 REVERSE LENGTH=831 | 201606	92491	5.15	1417.61	27	22	1.82	33.8
AT3G14420.1	| Aldolase-type TIM barrel family protein | Chr3:4821804-4823899 FORWARD LENGTH=367 | 201606	40373	9.16	1240.74	27	21	7.62	62.1
AT3G09260.1	| Glycosyl hydrolase superfamily protein | Chr3:2840657-2843730 REVERSE LENGTH=524 | 201606	60196	6.45	1139.1	26	17	2.47	33.6
AT1G16030.1	| heat shock protein 70B | Chr1:5502386-5504326 REVERSE LENGTH=646 | 201606	71270	5.3	738.09	25	8	0.34	14.6
AT3G17390.1	| S-adenosylmethionine synthetase family protein | Chr3:5952484-5953665 REVERSE LENGTH=393 | 201606	43168	5.51	1317.3	24	20	4.12	56.5
AT1G79920.1	| Heat shock protein 70 (Hsp 70) family protein | Chr1:30059302-30062224 REVERSE LENGTH=736 | 201606	82523	8.76	1150.72	24	19	1.75	37.8
AT5G26742.1	| DEAD box RNA helicase (RH3) | Chr5:9285540-9288871 REVERSE LENGTH=747 | 201606	81293	7.24	1067.18	24	18	2.09	33.3
AT1G62750.1	| Translation elongation factor EFG/EF2 protein | Chr1:23233622-23236321 REVERSE LENGTH=783 | 201606	86345	5.43	1413.37	23	21	2.18	41.8
AT2G36460.1	| Aldolase superfamily protein | Chr2:15296929-15298387 REVERSE LENGTH=358 | 201606	38705	7.01	1115.31	23	17	4.54	53.4
AT1G01320.1	| Tetratricopeptide repeat (TPR)-like superfamily protein | Chr1:121582-130099 REVERSE LENGTH=1797 | 201606	199620	5.92	1217.37	22	21	0.55	16.9
AT2G39800.1	| delta1-pyrroline-5-carboxylate synthase 1 | Chr2:16598516-16602939 REVERSE LENGTH=717 | 201606	78110	5.89	1412.72	22	20	2.41	37.7
AT3G14415.1	| Aldolase-type TIM barrel family protein | Chr3:4818667-4820748 FORWARD LENGTH=367 | 201606	40338	8.99	1004.77	22	16	5.37	59.1
AT2G36880.1	| methionine adenosyltransferase 3 | Chr2:15479721-15480893 REVERSE LENGTH=390 | 201606	42927	5.76	1011.93	22	14	2.51	43.3
AT1G49240.1	| actin 8 | Chr1:18216539-18217947 FORWARD LENGTH=377 | 201606	42064	5.37	1042.98	21	17	4.9	53.1
AT1G57720.1	| Translation elongation factor EF1B%2C gamma chain | Chr1:21377873-21380114 FORWARD LENGTH=413 | 201606	46598	5.55	1080	21	17	4.43	48.9
AT2G04030.1	| Chaperone protein htpG family protein | Chr2:1281983-1285909 FORWARD LENGTH=780 | 201606	89064	4.93	1120.94	20	19	1.8	38.8
AT4G34450.1	| coatomer gamma-2 subunit%2C putative / gamma-2 coat protein%2C putative / gamma-2 COP | Chr4:16471956-16476795 FORWARD LENGTH=886 | 201606	99113	5.06	1165.79	20	19	1.63	32.2
AT1G79550.1	| phosphoglycerate kinase | Chr1:29924347-29926295 REVERSE LENGTH=401 | 201606	42162	5.49	1135.82	20	16	3.82	53.9
AT2G31610.1	| Ribosomal protein S3 family protein | Chr2:13450384-13451669 FORWARD LENGTH=250 | 201606	27673	9.57	920.01	20	14	9.91	56.8
AT3G08580.1	| ADP/ATP carrier 1 | Chr3:2605706-2607030 REVERSE LENGTH=381 | 201606	41563	9.84	946.31	20	14	3.94	35.7
AT1G78900.1	| vacuolar ATP synthase subunit A | Chr1:29660463-29664575 FORWARD LENGTH=623 | 201606	69111	5.11	1018.07	19	18	2.54	41.7
AT5G19820.1	| ARM repeat superfamily protein | Chr5:6695731-6701247 REVERSE LENGTH=1116 | 201606	125058	4.77	1160.19	19	18	1.08	27.6
AT5G49910.1	| chloroplast heat shock protein 70-2 | Chr5:20303470-20306295 FORWARD LENGTH=718 | 201606	77064	5.17	999.88	19	17	1.95	26.6
AT1G09640.1	| Translation elongation factor EF1B%2C gamma chain | Chr1:3120162-3122152 FORWARD LENGTH=414 | 201606	46859	5.36	992.8	19	16	2.78	37.2
AT1G64740.1	| alpha-1 tubulin | Chr1:24050114-24052296 FORWARD LENGTH=450 | 201606	50453	4.92	1109.27	19	16	2.73	34.9
AT2G17360.1	| Ribosomal protein S4 (RPS4A) family protein | Chr2:7546598-7548138 FORWARD LENGTH=261 | 201606	29898	10.18	781.31	19	16	11.07	54.8
AT5G09810.1	| actin 7 | Chr5:3052809-3054220 FORWARD LENGTH=377 | 201606	41937	5.31	898.57	19	15	3.4	41.9
AT1G74050.1	| Ribosomal protein L6 family protein | Chr1:27847256-27848680 REVERSE LENGTH=233 | 201606	26091	10.18	845.91	19	14	8.15	46.8
AT3G53870.1	| Ribosomal protein S3 family protein | Chr3:19951547-19952782 FORWARD LENGTH=249 | 201606	27503	9.57	803.97	19	13	8.48	51.8
AT5G35530.1	| Ribosomal protein S3 family protein | Chr5:13710355-13712192 REVERSE LENGTH=248 | 201606	27612	9.57	806.21	19	13	8.39	52
AT4G10340.1	| light harvesting complex of photosystem II 5 | Chr4:6408200-6409496 FORWARD LENGTH=280 | 201606	30195	6	713.68	19	11	3.51	55
AT2G45290.1	| Transketolase | Chr2:18672737-18675589 FORWARD LENGTH=741 | 201606	80385	6.12	614.2	19	10	0.68	14.8
AT5G02870.1	| Ribosomal protein L4/L1 family | Chr5:657830-659526 FORWARD LENGTH=407 | 201606	44808	10.31	1159.66	18	17	4.8	44
AT1G43170.1	| ribosomal protein 1 | Chr1:16266992-16268631 FORWARD LENGTH=389 | 201606	44816	10.18	876.21	18	16	3.39	43.7
AT3G12110.1	| actin-11 | Chr3:3858116-3859609 FORWARD LENGTH=377 | 201606	41876	5.23	730.02	18	14	3.42	40.6
AT2G37620.1	| actin 1 | Chr2:15779761-15781241 FORWARD LENGTH=377 | 201606	42056	5.31	653.84	18	13	2.97	36.9
AT5G28540.1	| heat shock protein 70 (Hsp 70) family protein | Chr5:10540665-10543274 REVERSE LENGTH=669 | 201606	73869	5.08	554.52	18	8	0.66	16.4
AT3G22890.1	| ATP sulfurylase 1 | Chr3:8112837-8114734 FORWARD LENGTH=463 | 201606	51484	6.34	847.76	17	14	2.09	35.4
AT1G02500.1	| S-adenosylmethionine synthetase 1 | Chr1:519037-520218 FORWARD LENGTH=393 | 201606	43587	5.51	893.61	17	13	2.13	37.7
AT3G46520.1	| actin-12 | Chr3:17128567-17129981 FORWARD LENGTH=377 | 201606	41996	5.37	669.26	17	13	2.99	36.9
AT4G01850.1	| S-adenosylmethionine synthetase 2 | Chr4:796298-797479 REVERSE LENGTH=393 | 201606	43627	5.67	818.95	17	13	1.85	35.1
AT5G56500.1	| TCP-1/cpn60 chaperonin family protein | Chr5:22874058-22876966 FORWARD LENGTH=597 | 201606	63627	5.73	694.91	17	12	1.34	27.8
AT3G63460.1	| transducin family protein / WD-40 repeat family protein | Chr3:23431009-23437241 REVERSE LENGTH=1104 | 201606	120769	5	1024.82	16	16	0.8	18.8
AT4G11420.1	| eukaryotic translation initiation factor 3A | Chr4:6947834-6952053 REVERSE LENGTH=987 | 201606	114571	9.21	856.87	16	16	0.93	26
AT2G20580.1	| 26S proteasome regulatory subunit S2 1A | Chr2:8859211-8864699 FORWARD LENGTH=891 | 201606	98766	4.96	961.68	16	15	1.14	24.8
AT3G09630.1	| Ribosomal protein L4/L1 family | Chr3:2953813-2955444 FORWARD LENGTH=406 | 201606	44788	10.34	958.82	16	15	4.82	42.4
AT3G09840.1	| cell division cycle 48 | Chr3:3019494-3022832 FORWARD LENGTH=809 | 201606	90079	5.13	912.82	16	15	1.19	20.4
AT1G33120.1	| Ribosomal protein L6 family | Chr1:12010986-12012223 FORWARD LENGTH=194 | 201606	22118	9.48	854.44	16	14	10.26	64.9
AT2G01250.1	| Ribosomal protein L30/L7 family protein | Chr2:132943-134264 REVERSE LENGTH=242 | 201606	28210	9.93	765.72	16	14	15.16	62.4
AT5G35630.1	| glutamine synthetase 2 | Chr5:13831220-13833239 FORWARD LENGTH=430 | 201606	47780	6.43	826.78	16	14	2.38	39.5
AT4G27090.1	| Ribosomal protein L14 | Chr4:13594104-13595187 REVERSE LENGTH=134 | 201606	15496	10.03	668.12	16	10	12.86	55.2
AT3G13640.1	| RNAse l inhibitor protein 1 | Chr3:4458751-4461323 REVERSE LENGTH=603 | 201606	69030	8.43	368.07	16	6	0.72	14.4
AT1G65930.1	| cytosolic NADP+-dependent isocitrate dehydrogenase | Chr1:24539088-24541861 FORWARD LENGTH=410 | 201606	46059	6.13	963.3	15	15	4.54	49.3
AT4G24280.1	| chloroplast heat shock protein 70-1 | Chr4:12590094-12593437 FORWARD LENGTH=718 | 201606	76575	5.07	860.25	15	15	1.66	23
AT1G59610.1	| dynamin-like 3 | Chr1:21893413-21900780 FORWARD LENGTH=920 | 201606	100452	9.1	737.63	15	14	0.86	21.3
AT5G27640.1	| translation initiation factor 3B1 | Chr5:9781207-9784759 REVERSE LENGTH=712 | 201606	81995	5.12	859.28	15	14	1.25	30.1
AT4G04640.1	| ATPase%2C F1 complex%2C gamma subunit protein | Chr4:2350761-2351882 REVERSE LENGTH=373 | 201606	41171	8.13	664.73	15	11	2.35	34.6
AT4G31700.1	| ribosomal protein S6 | Chr4:15346306-15347714 REVERSE LENGTH=250 | 201606	28578	10.61	762.2	15	11	3.25	44.8
AT1G30230.1	| translation elongation factor EF1B/ribosomal protein S6 family protein | Chr1:10639286-10640515 FORWARD LENGTH=231 | 201606	25231	4.43	530.88	15	10	4.13	45
AT5G10360.1	| Ribosomal protein S6e | Chr5:3258734-3260142 REVERSE LENGTH=249 | 201606	28373	10.83	736.32	15	10	3.95	44.6
AT1G06950.1	| translocon at the inner envelope membrane of chloroplasts 110 | Chr1:2130303-2135563 REVERSE LENGTH=1016 | 201606	112565	5.73	709.4	14	14	0.81	20.6
AT4G31480.1	| Coatomer%2C beta subunit | Chr4:15264145-15267384 FORWARD LENGTH=948 | 201606	107161	5.59	828.11	14	14	1.01	24.1
AT3G15730.1	| phospholipase D alpha 1 | Chr3:5330835-5333474 FORWARD LENGTH=810 | 201606	92246	5.53	817.69	14	13	0.88	21.2
AT4G35090.1	| catalase 2 | Chr4:16700937-16703215 REVERSE LENGTH=492 | 201606	57237	6.63	767.03	14	13	1.76	33.7
AT2G44120.2	| Ribosomal protein L30/L7 family protein | Chr2:18249227-18250417 REVERSE LENGTH=247 | 201606	28559	9.87	601.44	14	12	9.14	46.2
AT3G02360.1	| 6-phosphogluconate dehydrogenase family protein | Chr3:482498-483958 FORWARD LENGTH=486 | 201606	53829	7.02	619.66	14	12	2.44	32.5
AT1G18540.1	| Ribosomal protein L6 family protein | Chr1:6377448-6378548 REVERSE LENGTH=233 | 201606	26136	10.09	482.89	14	9	4.69	42.9
AT2G20450.1	| Ribosomal protein L14 | Chr2:8813923-8815071 FORWARD LENGTH=134 | 201606	15497	10.12	633.34	14	9	9.66	47.8
AT1G29930.1	| chlorophyll A/B binding protein 1 | Chr1:10478071-10478874 FORWARD LENGTH=267 | 201606	28280	5.47	547.89	14	8	2.21	28.5
AT2G34420.1	| photosystem II light harvesting complex protein B1B2 | Chr2:14522716-14523513 REVERSE LENGTH=265 | 201606	28093	5.28	547.89	14	8	2.24	28.7
AT1G23410.1	| Ribosomal protein S27a / Ubiquitin family protein | Chr1:8314940-8315410 FORWARD LENGTH=156 | 201606	17889	9.77	493.73	14	7	6.88	39.1
AT1G68010.1	| hydroxypyruvate reductase | Chr1:25493418-25495720 FORWARD LENGTH=386 | 201606	42449	6.68	704.72	13	13	2.93	41.7
AT3G55610.1	| delta 1-pyrroline-5-carboxylate synthase 2 | Chr3:20624278-20628989 REVERSE LENGTH=726 | 201606	79164	6.35	823.49	13	13	1.86	31
AT4G37930.1	| serine transhydroxymethyltransferase 1 | Chr4:17831891-17834742 REVERSE LENGTH=517 | 201606	57535	8.13	710.31	13	13	1.56	29.2
AT1G18080.1	| Transducin/WD40 repeat-like superfamily protein | Chr1:6222325-6223901 FORWARD LENGTH=327 | 201606	36124	7.62	600	13	12	3.45	42.5
AT1G52360.1	| Coatomer%2C beta~ subunit | Chr1:19499282-19505397 FORWARD LENGTH=926 | 201606	105370	4.84	622.72	13	12	0.61	14.3
AT1G78570.1	| rhamnose biosynthesis 1 | Chr1:29550110-29552207 FORWARD LENGTH=669 | 201606	75837	6.84	730.59	13	12	1.28	24.8
AT2G36580.1	| Pyruvate kinase family protein | Chr2:15339253-15342781 FORWARD LENGTH=527 | 201606	58099	5.96	750.83	13	12	1.54	30.9
AT3G15980.1	| Coatomer%2C beta~ subunit | Chr3:5411699-5418313 REVERSE LENGTH=909 | 201606	103438	4.84	686.42	13	12	0.62	16.3
AT3G52990.1	| Pyruvate kinase family protein | Chr3:19649046-19652237 FORWARD LENGTH=527 | 201606	57915	6.66	875.01	13	12	1.54	36.1
AT4G18480.1	| P-loop containing nucleoside triphosphate hydrolases superfamily protein | Chr4:10201897-10203361 REVERSE LENGTH=424 | 201606	46526	6.08	737.69	13	12	1.92	33.7
AT2G41840.1	| Ribosomal protein S5 family protein | Chr2:17460016-17461398 REVERSE LENGTH=285 | 201606	31087	10.3	609.38	13	10	3.93	38.2
AT2G47610.1	| Ribosomal protein L7Ae/L30e/S12e/Gadd45 family protein | Chr2:19529854-19531401 FORWARD LENGTH=257 | 201606	29339	10.14	607.08	13	10	2.56	32.3
AT3G62870.1	| Ribosomal protein L7Ae/L30e/S12e/Gadd45 family protein | Chr3:23242862-23244273 REVERSE LENGTH=256 | 201606	29187	10.15	598.94	13	10	2.57	32.4
AT5G08680.1	| ATP synthase alpha/beta family protein | Chr5:2821992-2824683 FORWARD LENGTH=559 | 201606	59993	6.06	628.95	13	10	1	27
AT1G07890.1	| ascorbate peroxidase 1 | Chr1:2438005-2439435 FORWARD LENGTH=250 | 201606	27829	5.72	599.7	13	9	4.92	54.8
AT2G21660.1	| cold%2C circadian rhythm%2C and rna binding 2 | Chr2:9265477-9266316 REVERSE LENGTH=176 | 201606	16937	5.85	673.1	13	9	7.75	54
AT1G27400.1	| Ribosomal protein L22p/L17e family protein | Chr1:9515230-9516725 FORWARD LENGTH=176 | 201606	20056	10.12	321.4	13	6	2.41	36.4
AT1G09340.1	| chloroplast RNA binding protein | Chr1:3015473-3018035 FORWARD LENGTH=378 | 201606	42764	8.19	633.83	12	12	2.2	40.2
AT1G20620.1	| catalase 3 | Chr1:7143142-7146193 FORWARD LENGTH=492 | 201606	57059	7.31	770.44	12	12	1.23	28.7
AT1G29880.1	| glycyl-tRNA synthetase / glycine-tRNA ligase | Chr1:10459662-10462781 REVERSE LENGTH=729 | 201606	82576	6.59	635.67	12	12	1.13	22.8
AT3G18130.1	| receptor for activated C kinase 1C | Chr3:6211109-6212371 REVERSE LENGTH=326 | 201606	36204	6.66	574.66	12	12	3.96	51.2
AT4G35830.1	| aconitase 1 | Chr4:16973007-16977949 REVERSE LENGTH=898 | 201606	98774	5.98	556.32	12	12	0.73	16.9
AT4G39330.1	| cinnamyl alcohol dehydrogenase 9 | Chr4:18291268-18292772 FORWARD LENGTH=360 | 201606	39365	6.21	831.97	12	12	2.18	41.9
AT5G42080.1	| dynamin-like protein | Chr5:16820661-16824536 REVERSE LENGTH=610 | 201606	68472	8.47	637.73	12	12	1.34	23.3
AT1G10290.1	| dynamin-like protein 6 | Chr1:3370774-3377120 FORWARD LENGTH=914 | 201606	99391	9.09	564.82	12	11	0.8	18.1
AT4G27440.1	| protochlorophyllide oxidoreductase B | Chr4:13725648-13727107 FORWARD LENGTH=401 | 201606	43560	9.23	703.35	12	11	2.8	31.7
AT1G61520.1	| PSI type III chlorophyll a/b-binding protein | Chr1:22700152-22701149 FORWARD LENGTH=273 | 201606	29163	8.61	657.85	12	10	1.69	27.1
AT1G70410.1	| beta carbonic anhydrase 4 | Chr1:26534167-26536505 REVERSE LENGTH=258 | 201606	28737	6.66	581.83	12	10	3.21	41.1
AT4G28080.1	| Tetratricopeptide repeat (TPR)-like superfamily protein | Chr4:13948993-13957840 REVERSE LENGTH=1819 | 201606	200475	5.81	475.54	12	10	0.31	8.5
AT2G07698.1	| ATPase%2C F1 complex%2C alpha subunit protein | Chr2:3361474-3364028 FORWARD LENGTH=777 | 201606	86221	5.44	504.37	12	9	0.62	14.3
AT5G18380.1	| Ribosomal protein S5 domain 2-like superfamily protein | Chr5:6090253-6090693 REVERSE LENGTH=146 | 201606	16835	10.21	513.63	12	9	5.96	53.4
AT2G32730.1	| 26S proteasome regulatory complex%2C non-ATPase subcomplex%2C Rpn2/Psmd1 subunit | Chr2:13880189-13885464 FORWARD LENGTH=1004 | 201606	109365	5.23	588.43	11	11	0.64	14.3
AT3G09200.1	| Ribosomal protein L10 family protein | Chr3:2823364-2825020 REVERSE LENGTH=320 | 201606	34169	5	831.57	11	11	2.79	40
AT3G11710.1	| lysyl-tRNA synthetase 1 | Chr3:3702359-3705613 REVERSE LENGTH=626 | 201606	71242	5.9	562.73	11	11	1.4	24.1
AT3G47520.1	| malate dehydrogenase | Chr3:17513657-17514868 FORWARD LENGTH=403 | 201606	42607	8.66	728.01	11	11	1.92	39.7
AT3G57290.1	| eukaryotic translation initiation factor 3E | Chr3:21196786-21199073 REVERSE LENGTH=441 | 201606	52003	5.59	638.99	11	11	2.32	37.2
ATCG00800.1	| structural constituent of ribosome | ChrC:82826-83482 REVERSE LENGTH=218 | 201606	25344	9.51	556.01	11	11	6.06	56
AT4G34200.1	| D-3-phosphoglycerate dehydrogenase | Chr4:16374041-16376561 REVERSE LENGTH=603 | 201606	63571	6.16	619.21	11	10	0.92	27
AT5G23060.1	| calcium sensing receptor | Chr5:7736760-7738412 REVERSE LENGTH=387 | 201606	41374	9.42	614.39	11	10	1.72	30.7
AT5G30510.1	| ribosomal protein S1 | Chr5:11619262-11621223 REVERSE LENGTH=416 | 201606	45310	5.13	549.29	11	10	1.5	31
AT1G03630.1	| protochlorophyllide oxidoreductase C | Chr1:907699-909245 FORWARD LENGTH=401 | 201606	44084	9.18	496.2	11	9	1.82	25.9
AT5G15200.1	| Ribosomal protein S4 | Chr5:4935124-4936334 REVERSE LENGTH=198 | 201606	23079	10.17	411.81	11	9	4.95	45.5
AT3G25520.1	| ribosomal protein L5 | Chr3:9269573-9271327 REVERSE LENGTH=301 | 201606	34394	9.32	394.24	11	7	1.62	21.3
AT1G66270.1	| Glycosyl hydrolase superfamily protein | Chr1:24700110-24702995 REVERSE LENGTH=524 | 201606	60025	6.55	238.64	11	5	0.62	13.4
AT1G50200.1	| Alanyl-tRNA synthetase | Chr1:18591429-18598311 REVERSE LENGTH=1003 | 201606	111275	6.05	583.02	10	10	0.75	18.5
AT1G54040.2	| epithiospecifier protein | Chr1:20170995-20173885 REVERSE LENGTH=341 | 201606	37042	5.56	496.61	10	10	2.82	35.8
AT2G16950.1	| transportin 1 | Chr2:7353939-7360637 FORWARD LENGTH=895 | 201606	100826	4.81	498.93	10	10	0.51	13.4
AT3G02760.1	| Class II aaRS and biotin synthetases superfamily protein | Chr3:597588-600650 REVERSE LENGTH=883 | 201606	98445	6.1	444.37	10	10	0.66	15.5
AT4G10320.1	| tRNA synthetase class I (I%2C L%2C M and V) family protein | Chr4:6397526-6404509 REVERSE LENGTH=1190 | 201606	136368	5.94	444.84	10	10	0.44	12.4
AT5G07350.1	| TUDOR-SN protein 1 | Chr5:2320344-2324892 REVERSE LENGTH=991 | 201606	108624	6.92	553.09	10	10	0.71	15.6
AT5G26360.1	| TCP-1/cpn60 chaperonin family protein | Chr5:9255561-9258891 REVERSE LENGTH=555 | 201606	60872	5.56	536.25	10	10	1.27	22.9
AT5G65010.1	| asparagine synthetase 2 | Chr5:25969224-25972278 FORWARD LENGTH=578 | 201606	65559	6.01	532.43	10	10	1.01	21.3
AT2G40290.1	| Eukaryotic translation initiation factor 2 subunit 1 | Chr2:16829030-16830889 REVERSE LENGTH=344 | 201606	39008	5.08	587.57	10	9	1.11	25.9
AT4G28470.1	| 26S proteasome regulatory subunit S2 1B | Chr4:14067082-14072357 REVERSE LENGTH=891 | 201606	98576	5.08	587.84	10	9	0.66	18.3
AT4G38510.1	| ATPase%2C V1 complex%2C subunit B protein | Chr4:18011155-18014789 REVERSE LENGTH=487 | 201606	54385	5.03	415.42	10	9	1.15	23.4
AT5G20290.1	| Ribosomal protein S8e family protein | Chr5:6851695-6853012 REVERSE LENGTH=222 | 201606	25092	10.32	760.84	10	9	2.72	43.2
AT5G41670.1	| 6-phosphogluconate dehydrogenase family protein | Chr5:16665647-16667110 REVERSE LENGTH=487 | 201606	53626	5.62	527.01	10	9	1.01	30.2
AT5G45930.1	| magnesium chelatase i2 | Chr5:18628095-18629565 FORWARD LENGTH=418 | 201606	46468	5.36	558.62	10	9	1.23	23.4
AT1G22780.1	| Ribosomal protein S13/S18 family | Chr1:8067990-8069163 FORWARD LENGTH=152 | 201606	17591	10.54	585.55	10	8	4.13	44.7
AT1G26630.1	| Eukaryotic translation initiation factor 5A-1 (eIF-5A 1) protein | Chr1:9205968-9207098 FORWARD LENGTH=159 | 201606	17358	5.55	596.44	10	8	5.63	65.4
AT2G18020.1	| Ribosomal protein L2 family | Chr2:7837151-7838160 FORWARD LENGTH=258 | 201606	28013	10.91	562.19	10	8	2.26	36.8
AT3G14990.1	| Class I glutamine amidotransferase-like superfamily protein | Chr3:5047510-5049621 FORWARD LENGTH=392 | 201606	42230	5.31	546	10	8	1.2	34.9
AT3G48930.1	| Nucleic acid-binding%2C OB-fold-like protein | Chr3:18141017-18142189 REVERSE LENGTH=160 | 201606	18174	10.56	467.6	10	8	5.06	38.1
AT4G23680.1	| Polyketide cyclase/dehydrase and lipid transport superfamily protein | Chr4:12336416-12337417 REVERSE LENGTH=151 | 201606	17520	5.89	510.97	10	8	5.48	48.3
AT4G26530.1	| Aldolase superfamily protein | Chr4:13391566-13392937 FORWARD LENGTH=358 | 201606	38555	5.65	627.42	10	8	1.12	22.6
AT5G60600.1	| 4-hydroxy-3-methylbut-2-enyl diphosphate synthase | Chr5:24359447-24363274 FORWARD LENGTH=741 | 201606	82832	6.01	440.76	10	8	0.74	18.6
AT1G09620.1	| ATP binding/leucine-tRNA ligases/aminoacyl-tRNA ligase | Chr1:3113077-3116455 REVERSE LENGTH=1091 | 201606	124513	5.74	396.44	9	9	0.45	11.8
AT1G11860.1	| Glycine cleavage T-protein family | Chr1:4001801-4003245 FORWARD LENGTH=408 | 201606	44759	8.55	562.05	9	9	1.53	32.6
AT1G20200.1	| PAM domain (PCI/PINT associated module) protein | Chr1:7001409-7004154 REVERSE LENGTH=488 | 201606	55890	8.35	665.68	9	9	1.26	26.8
AT1G23310.1	| glutamate:glyoxylate aminotransferase | Chr1:8268720-8271329 REVERSE LENGTH=481 | 201606	53780	6.49	523.34	9	9	1.73	30.8
AT1G48630.1	| receptor for activated C kinase 1B | Chr1:17981977-17983268 REVERSE LENGTH=326 | 201606	36234	6.66	389.9	9	9	3.96	52.8
AT1G64790.1	| ILITYHIA | Chr1:24065232-24081908 REVERSE LENGTH=2610 | 201606	286993	6.77	411.76	9	9	0.21	6.4
AT2G39990.1	| eukaryotic translation initiation factor 2 | Chr2:16698332-16699929 REVERSE LENGTH=293 | 201606	31956	4.92	641.57	9	9	2.2	46.4
AT2G42600.1	| phosphoenolpyruvate carboxylase 2 | Chr2:17734541-17738679 REVERSE LENGTH=963 | 201606	110311	5.57	432.37	9	9	0.46	12.6
AT2G46280.1	| TGF-beta receptor interacting protein 1 | Chr2:19003656-19005393 REVERSE LENGTH=328 | 201606	36651	6.5	562.02	9	9	2.88	40.2
AT3G16460.1	| Mannose-binding lectin superfamily protein | Chr3:5593029-5595522 FORWARD LENGTH=705 | 201606	72430	5.31	591.36	9	9	0.68	17
AT3G25230.1	| rotamase FKBP 1 | Chr3:9188257-9191137 FORWARD LENGTH=551 | 201606	61700	5.24	497.11	9	9	0.96	19.2
AT3G56150.1	| eukaryotic translation initiation factor 3C | Chr3:20833790-20836820 REVERSE LENGTH=900 | 201606	103283	5.21	514.91	9	9	0.56	15.2
AT3G58610.1	| ketol-acid reductoisomerase | Chr3:21671561-21674639 FORWARD LENGTH=591 | 201606	64172	6.36	553.66	9	9	0.79	16.8
AT4G24820.1	| 26S proteasome regulatory subunit Rpn7 | Chr4:12790471-12792599 REVERSE LENGTH=387 | 201606	44425	5.71	581.15	9	9	1.55	29.7
AT4G29040.1	| regulatory particle AAA-ATPase 2A | Chr4:14312369-14314386 FORWARD LENGTH=443 | 201606	49510	5.92	453.43	9	9	1.74	38.4
AT4G30530.1	| Class I glutamine amidotransferase-like superfamily protein | Chr4:14920605-14922286 FORWARD LENGTH=250 | 201606	28653	5.46	597.25	9	9	4.64	52.4
AT5G09900.1	| 26S proteasome regulatory subunit%2C putative (RPN5) | Chr5:3089462-3092434 REVERSE LENGTH=442 | 201606	51204	7.05	452.99	9	9	1.08	22.6
AT5G20890.1	| TCP-1/cpn60 chaperonin family protein | Chr5:7087020-7089906 REVERSE LENGTH=527 | 201606	57763	5.59	618.67	9	9	1.21	30.6
AT5G26710.1	| Glutamyl/glutaminyl-tRNA synthetase%2C class Ic | Chr5:9305673-9308247 FORWARD LENGTH=719 | 201606	81527	6.61	469.22	9	9	0.67	15.9
AT5G36230.1	| ARM repeat superfamily protein | Chr5:14273519-14276773 FORWARD LENGTH=411 | 201606	47357	5.51	472.19	9	9	1.2	30.2
AT5G61780.1	| TUDOR-SN protein 2 | Chr5:24822012-24826641 FORWARD LENGTH=985 | 201606	108131	6.2	533.19	9	9	0.59	16.5
AT1G22300.1	| general regulatory factor 10 | Chr1:7879146-7881103 REVERSE LENGTH=254 | 201606	29011	4.73	479.61	9	8	2.13	27.2
AT1G24510.1	| TCP-1/cpn60 chaperonin family protein | Chr1:8685504-8688101 REVERSE LENGTH=535 | 201606	59860	5.46	408.05	9	8	0.87	16.6
AT1G45000.1	| AAA-type ATPase family protein | Chr1:17009220-17011607 FORWARD LENGTH=399 | 201606	44898	8.25	419.23	9	8	1.77	34.6
AT1G53500.1	| NAD-dependent epimerase/dehydratase family protein | Chr1:19967157-19969239 REVERSE LENGTH=667 | 201606	75691	6.04	559.82	9	8	0.64	16
AT2G09990.1	| Ribosomal protein S5 domain 2-like superfamily protein | Chr2:3781442-3781882 FORWARD LENGTH=146 | 201606	16849	10.21	468.99	9	8	4.46	52.1
AT2G47730.1	| glutathione S-transferase phi 8 | Chr2:19558213-19559266 FORWARD LENGTH=263 | 201606	29270	8.5	365.35	9	8	2.56	29.3
AT3G13580.1	| Ribosomal protein L30/L7 family protein | Chr3:4433809-4435109 FORWARD LENGTH=244 | 201606	28473	9.95	401.68	9	8	5.57	36.5
AT3G14790.1	| rhamnose biosynthesis 3 | Chr3:4964791-4966875 FORWARD LENGTH=664 | 201606	75437	6.11	544.22	9	8	0.64	16.4
AT3G60770.1	| Ribosomal protein S13/S15 | Chr3:22460525-22461656 REVERSE LENGTH=151 | 201606	17142	10.39	437.85	9	8	7.63	53.6
AT4G00100.1	| ribosomal protein S13A | Chr4:37172-38123 FORWARD LENGTH=151 | 201606	17132	10.39	455.29	9	8	7.63	53.6
AT4G36130.1	| Ribosomal protein L2 family | Chr4:17097613-17098656 FORWARD LENGTH=258 | 201606	28159	10.83	583.89	9	8	2.23	36.4
AT5G10450.1	| G-box regulating factor 6 | Chr5:3284452-3286261 REVERSE LENGTH=248 | 201606	28072	4.77	451.08	9	8	3.35	46.4
AT5G46290.1	| 3-ketoacyl-acyl carrier protein synthase I | Chr5:18774439-18776629 REVERSE LENGTH=473 | 201606	50895	8.29	542.04	9	8	0.92	20.5
AT5G58290.1	| regulatory particle triple-A ATPase 3 | Chr5:23569155-23571116 FORWARD LENGTH=408 | 201606	45894	5.42	447.35	9	8	1.26	25
AT1G14320.1	| Ribosomal protein L16p/L10e family protein | Chr1:4888270-4889408 FORWARD LENGTH=220 | 201606	25357	10.5	428.16	9	7	3.33	38.6
AT3G11940.1	| ribosomal protein 5A | Chr3:3778175-3779354 REVERSE LENGTH=207 | 201606	23021	9.66	384.76	9	6	2.5	39.1
AT3G47470.1	| light-harvesting chlorophyll-protein complex I subunit A4 | Chr3:17493622-17494773 REVERSE LENGTH=251 | 201606	27773	6.22	473.03	9	6	1.83	39.8
AT4G14680.1	| Pseudouridine synthase/archaeosine transglycosylase-like family protein | Chr4:8413443-8415311 REVERSE LENGTH=465 | 201606	52054	6.88	335.39	9	6	0.61	12.9
AT1G04410.1	| Lactate/malate dehydrogenase family protein | Chr1:1189418-1191267 REVERSE LENGTH=332 | 201606	35890	6.11	431.42	8	8	2.17	40.7
AT1G14830.1	| DYNAMIN-like 1C | Chr1:5107699-5111470 REVERSE LENGTH=614 | 201606	69022	7.22	404.7	8	8	0.62	19.9
AT1G31330.1	| photosystem I subunit F | Chr1:11215011-11215939 REVERSE LENGTH=221 | 201606	24329	9.58	432.41	8	8	1.76	35.7
AT1G48600.1	| S-adenosyl-L-methionine-dependent methyltransferases superfamily protein | Chr1:17966448-17969077 FORWARD LENGTH=475 | 201606	54554	5.04	439.92	8	8	1.31	26.5
AT1G53310.1	| phosphoenolpyruvate carboxylase 1 | Chr1:19884261-19888070 REVERSE LENGTH=967 | 201606	110730	5.72	381.43	8	8	0.4	12.7
AT1G63940.1	| monodehydroascorbate reductase 6 | Chr1:23730206-23733534 FORWARD LENGTH=486 | 201606	52754	7.05	515.04	8	8	1.03	26.7
AT1G73600.1	| S-adenosyl-L-methionine-dependent methyltransferases superfamily protein | Chr1:27670825-27673400 FORWARD LENGTH=490 | 201606	56902	5.34	520.69	8	8	0.93	22.4
AT2G22125.1	| binding protein | Chr2:9406793-9414223 FORWARD LENGTH=2150 | 201606	232956	5.21	567.65	8	8	0.24	9.4
AT2G30860.1	| glutathione S-transferase PHI 9 | Chr2:13139132-13140057 FORWARD LENGTH=215 | 201606	24131	6.17	457.85	8	8	2.93	48.4
AT2G34480.1	| Ribosomal protein L18ae/LX family protein | Chr2:14532916-14534161 REVERSE LENGTH=178 | 201606	21407	10.49	395.77	8	8	5.82	45.5
AT2G35840.1	| Sucrose-6F-phosphate phosphohydrolase family protein | Chr2:15053952-15055776 FORWARD LENGTH=422 | 201606	48053	6.13	390.94	8	8	1.18	29.1
AT3G02200.2	| Proteasome component (PCI) domain protein | Chr3:406692-408919 FORWARD LENGTH=417 | 201606	47097	5.06	418.02	8	8	1.88	28.8
AT3G02530.1	| TCP-1/cpn60 chaperonin family protein | Chr3:528806-532457 REVERSE LENGTH=535 | 201606	59426	5.83	557.85	8	8	0.88	20.2
AT3G04840.1	| Ribosomal protein S3Ae | Chr3:1329751-1331418 FORWARD LENGTH=262 | 201606	30060	9.78	413.87	8	8	2.44	35.5
AT3G07100.1	| Sec23/Sec24 protein transport family protein | Chr3:2245689-2250077 REVERSE LENGTH=1038 | 201606	114629	8.07	468.8	8	8	0.39	9.2
AT3G14940.1	| phosphoenolpyruvate carboxylase 3 | Chr3:5025584-5029476 FORWARD LENGTH=968 | 201606	110661	5.73	391.82	8	8	0.46	12.1
AT3G18190.1	| TCP-1/cpn60 chaperonin family protein | Chr3:6232226-6233836 FORWARD LENGTH=536 | 201606	58195	7.57	473.36	8	8	0.9	21.6
AT3G20050.1	| T-complex protein 1 alpha subunit | Chr3:6998544-7002266 REVERSE LENGTH=545 | 201606	59477	5.93	393.2	8	8	0.88	20.6
AT4G01310.1	| Ribosomal L5P family protein | Chr4:544166-545480 REVERSE LENGTH=262 | 201606	28440	10	458.12	8	8	2.2	33.2
AT4G29060.1	| elongation factor Ts family protein | Chr4:14317744-14321315 FORWARD LENGTH=953 | 201606	104174	4.95	346.58	8	8	0.55	12.5
AT5G05010.1	| clathrin adaptor complexes medium subunit family protein | Chr5:1477137-1479872 FORWARD LENGTH=527 | 201606	57853	5.63	517.46	8	8	0.78	17.8
AT5G14040.1	| phosphate transporter 3%3B1 | Chr5:4531059-4532965 REVERSE LENGTH=375 | 201606	40463	9.29	304.7	8	8	1.78	28
AT5G16070.1	| TCP-1/cpn60 chaperonin family protein | Chr5:5247549-5251050 REVERSE LENGTH=535 | 201606	59347	5.88	537.64	8	8	0.88	19.6
AT1G04480.1	| Ribosomal protein L14p/L23e family protein | Chr1:1216110-1217257 FORWARD LENGTH=140 | 201606	15188	10.48	376.34	8	7	10.21	70.7
AT1G64190.1	| 6-phosphogluconate dehydrogenase family protein | Chr1:23825549-23827012 REVERSE LENGTH=487 | 201606	53686	5.34	374.6	8	7	0.86	18.5
AT1G78300.1	| general regulatory factor 2 | Chr1:29461883-29463052 FORWARD LENGTH=259 | 201606	29258	4.71	326.27	8	7	1.68	24.7
AT1G79340.1	| metacaspase 4 | Chr1:29842849-29844368 FORWARD LENGTH=418 | 201606	45968	4.7	444.62	8	7	0.72	17.5
AT3G05590.1	| ribosomal protein L18 | Chr3:1621511-1622775 FORWARD LENGTH=187 | 201606	20970	10.97	461.71	8	7	2.94	42.2
AT3G11830.1	| TCP-1/cpn60 chaperonin family protein | Chr3:3732734-3736156 FORWARD LENGTH=557 | 201606	60195	6.03	337.36	8	7	0.62	15.6
AT3G24830.1	| Ribosomal protein L13 family protein | Chr3:9064613-9065871 FORWARD LENGTH=206 | 201606	23729	10.35	521.74	8	7	3	40.3
AT3G49010.1	| breast basic conserved 1 | Chr3:18166971-18168047 REVERSE LENGTH=206 | 201606	23752	11.02	482.81	8	7	5.73	55.3
AT4G09000.1	| general regulatory factor 1 | Chr4:5775387-5777157 FORWARD LENGTH=267 | 201606	30027	4.68	368.21	8	7	2.44	33.3
AT5G23060.2	| calcium sensing receptor | Chr5:7737070-7738412 REVERSE LENGTH=310 | 201606	32995	9.08	385.44	8	7	1.12	24.2
AT5G27850.1	| Ribosomal protein L18e/L15 superfamily protein | Chr5:9873169-9874297 FORWARD LENGTH=187 | 201606	21011	10.96	481.77	8	7	3.79	40.6
AT5G38480.1	| general regulatory factor 3 | Chr5:15410277-15411285 FORWARD LENGTH=255 | 201606	28702	4.75	393.76	8	7	1.37	36.1
AT5G43010.1	| regulatory particle triple-A ATPase 4A | Chr5:17248563-17251014 REVERSE LENGTH=399 | 201606	44960	8.24	366.95	8	7	1.52	30.3
AT5G65430.1	| general regulatory factor 8 | Chr5:26148546-26150255 REVERSE LENGTH=248 | 201606	28125	4.82	384.08	8	7	2.24	34.3
AT5G66420.2	| TIM-barrel signal transduction protein | Chr5:26521893-26524986 REVERSE LENGTH=754 | 201606	81410	5.52	353.14	8	7	0.67	18.2
AT2G42100.1	| Actin-like ATPase superfamily protein | Chr2:17560211-17561945 FORWARD LENGTH=378 | 201606	42375	5.19	310.78	8	6	0.8	18.3
AT4G15000.1	| Ribosomal L27e protein family | Chr4:8571896-8572303 FORWARD LENGTH=135 | 201606	15712	10.26	308.38	8	6	3.74	41.5
AT2G37190.1	| Ribosomal protein L11 family protein | Chr2:15619559-15620059 REVERSE LENGTH=166 | 201606	18045	9.05	359.5	8	5	2.89	51.2
AT4G34870.1	| rotamase cyclophilin 5 | Chr4:16614451-16614969 FORWARD LENGTH=172 | 201606	18594	8.9	344.47	8	5	3.66	44.8
AT3G27690.1	| photosystem II light harvesting complex protein 2.3 | Chr3:10256002-10256921 FORWARD LENGTH=266 | 201606	28899	5.62	150.5	8	3	1.05	17.3
AT1G02080.2	| transcription regulator | Chr1:373694-386682 FORWARD LENGTH=2377 | 201606	265708	5.34	349.63	7	7	0.17	6.5
AT1G02930.1	| glutathione S-transferase 6 | Chr1:661363-662191 REVERSE LENGTH=208 | 201606	23471	5.8	391.53	7	7	1.87	27.4
AT1G04810.1	| 26S proteasome regulatory complex%2C non-ATPase subcomplex%2C Rpn2/Psmd1 subunit | Chr1:1350304-1355261 FORWARD LENGTH=1001 | 201606	109254	5.19	391.38	7	7	0.46	12.7
AT1G08520.1	| ALBINA 1 | Chr1:2696538-2700819 FORWARD LENGTH=760 | 201606	83688	5.26	278.86	7	7	0.56	18.2
AT1G29150.1	| non-ATPase subunit 9 | Chr1:10181240-10182499 FORWARD LENGTH=419 | 201606	47005	6.24	329.08	7	7	0.86	16.5
AT1G32060.1	| phosphoribulokinase | Chr1:11532668-11534406 FORWARD LENGTH=395 | 201606	44721	5.71	235.59	7	7	0.91	22.3
AT1G48850.1	| chorismate synthase%2C putative / 5-enolpyruvylshikimate-3-phosphate phospholyase | Chr1:18065154-18067956 REVERSE LENGTH=436 | 201606	47744	8.37	400.64	7	7	1.01	16.7
AT1G66200.1	| hypothetical protein | Chr1:24655520-24657520 REVERSE LENGTH=356 | 201606	39297	5.14	356.67	7	7	0.88	21.1
AT2G05830.1	| NagB/RpiA/CoA transferase-like superfamily protein | Chr2:2229759-2231839 FORWARD LENGTH=374 | 201606	39816	5.88	354.21	7	7	1.07	20.1
AT2G18960.1	| H[+]-ATPase 1 | Chr2:8221858-8227268 FORWARD LENGTH=949 | 201606	104614	6.25	356.83	7	7	0.32	9.8
AT2G42520.1	| P-loop containing nucleoside triphosphate hydrolases superfamily protein | Chr2:17705382-17708744 FORWARD LENGTH=633 | 201606	67813	6.63	339.18	7	7	0.63	15.2
AT2G46520.1	| cellular apoptosis susceptibility protein%2C putative / importin-alpha re-exporter | Chr2:19096867-19099785 FORWARD LENGTH=972 | 201606	109501	5.43	283.18	7	7	0.41	11.5
AT3G03960.1	| TCP-1/cpn60 chaperonin family protein | Chr3:1024432-1027604 FORWARD LENGTH=549 | 201606	59472	5.25	420.63	7	7	0.88	21.7
AT3G09820.1	| adenosine kinase 1 | Chr3:3012122-3014624 FORWARD LENGTH=344 | 201606	38268	5.29	506.56	7	7	1.13	28.2
AT3G16420.1	| PYK10-binding protein 1 | Chr3:5579560-5580674 FORWARD LENGTH=298 | 201606	32138	5.46	618.68	7	7	1.46	46
AT3G16950.2	| lipoamide dehydrogenase 1 | Chr3:5786508-5790383 REVERSE LENGTH=623 | 201606	66905	8.56	358.57	7	7	0.55	14.9
AT3G48990.1	| AMP-dependent synthetase and ligase family protein | Chr3:18159031-18161294 REVERSE LENGTH=514 | 201606	55738	6.08	431.01	7	7	0.69	16.9
AT3G52140.1	| tetratricopeptide repeat (TPR)-containing protein | Chr3:19333232-19341295 FORWARD LENGTH=1403 | 201606	154652	5.95	500.82	7	7	0.21	5.8
AT4G16155.1	| dihydrolipoamide dehydrogenase | Chr4:9153570-9157133 REVERSE LENGTH=567 | 201606	60564	7.29	381.29	7	7	0.62	16
AT4G16720.1	| Ribosomal protein L23/L15e family protein | Chr4:9400156-9401315 REVERSE LENGTH=204 | 201606	24338	11.44	370.42	7	7	2.28	29.9
AT4G17390.1	| Ribosomal protein L23/L15e family protein | Chr4:9714407-9715545 REVERSE LENGTH=204 | 201606	24338	11.44	370.42	7	7	2.28	29.9
AT4G33650.1	| dynamin-related protein 3A | Chr4:16161073-16166587 FORWARD LENGTH=808 | 201606	89970	6.02	412.89	7	7	0.59	13.2
AT4G34670.1	| Ribosomal protein S3Ae | Chr4:16548724-16550222 FORWARD LENGTH=262 | 201606	29956	9.75	361.88	7	7	1.62	37.4
AT5G13630.1	| magnesium-chelatase subunit chlH%2C chloroplast%2C putative / Mg-protoporphyrin IX chelatase%2C putative (CHLH) | Chr5:4387567-4392082 REVERSE LENGTH=1381 | 201606	153934	5.8	337.73	7	7	0.21	7.7
AT5G13650.1	| elongation factor family protein | Chr5:4397821-4402364 FORWARD LENGTH=675 | 201606	74839	6.86	539.79	7	7	0.48	15.7
AT5G35360.1	| acetyl Co-enzyme a carboxylase biotin carboxylase subunit | Chr5:13584300-13588268 FORWARD LENGTH=537 | 201606	58863	6.85	364.95	7	7	0.64	16.4
AT5G54190.1	| protochlorophyllide oxidoreductase A | Chr5:21991183-21992773 REVERSE LENGTH=405 | 201606	44121	9.42	462.24	7	7	1.56	21.2
ATCG00280.1	| photosystem II reaction center protein C | ChrC:33720-35141 FORWARD LENGTH=473 | 201606	52063	6.71	395.88	7	7	0.89	23.5
AT1G72370.1	| 40s ribosomal protein SA | Chr1:27243148-27244842 REVERSE LENGTH=298 | 201606	32499	5.05	345.82	7	6	1.14	25.2
AT2G16600.2	| rotamase CYP 3 | Chr2:7200862-7201383 FORWARD LENGTH=151 | 201606	16153	6.11	369.53	7	6	3.55	48.3
AT2G19730.1	| Ribosomal L28e protein family | Chr2:8511752-8512995 FORWARD LENGTH=143 | 201606	15943	10.58	407.99	7	6	3.64	48.3
AT2G21330.1	| fructose-bisphosphate aldolase 1 | Chr2:9128416-9130152 REVERSE LENGTH=399 | 201606	43075	6.18	400.03	7	6	0.78	17
AT2G27720.1	| 60S acidic ribosomal protein family | Chr2:11818696-11819370 FORWARD LENGTH=115 | 201606	11445	4.59	428.74	7	6	4.88	67.8
AT2G39460.1	| ribosomal protein L23AA | Chr2:16475049-16475904 FORWARD LENGTH=154 | 201606	17430	10.2	383.3	7	6	3.1	43.5
AT4G38970.1	| fructose-bisphosphate aldolase 2 | Chr4:18163714-18165659 REVERSE LENGTH=398 | 201606	43132	6.78	345.45	7	6	0.78	20.9
AT5G10470.1	| kinesin like protein for actin based chloroplast movement 1 | Chr5:3290121-3297248 REVERSE LENGTH=1273 | 201606	141519	5.87	339.07	7	6	0.19	6.5
AT5G23740.1	| ribosomal protein S11-beta | Chr5:8008251-8009330 REVERSE LENGTH=159 | 201606	17966	10.62	335.56	7	6	2.13	37.1
AT1G26910.1	| Ribosomal protein L16p/L10e family protein | Chr1:9321709-9322813 FORWARD LENGTH=221 | 201606	25349	10.45	316.63	7	5	1.66	25.8
AT1G66580.1	| senescence associated gene 24 | Chr1:24839208-24840439 FORWARD LENGTH=221 | 201606	25312	10.57	327.21	7	5	1.66	28.1
AT2G36160.1	| Ribosomal protein S11 family protein | Chr2:15169925-15171159 FORWARD LENGTH=150 | 201606	16304	10.6	314.44	7	5	3.5	46
AT2G37270.1	| ribosomal protein 5B | Chr2:15647883-15649042 REVERSE LENGTH=207 | 201606	23090	9.69	284.39	7	5	1.92	39.1
AT3G11510.1	| Ribosomal protein S11 family protein | Chr3:3623757-3624866 REVERSE LENGTH=150 | 201606	16320	10.6	329.33	7	5	3.5	46
AT3G49910.1	| Translation protein SH3-like family protein | Chr3:18504311-18504751 FORWARD LENGTH=146 | 201606	16934	10.79	367.12	7	5	4.41	34.9
AT3G52580.1	| Ribosomal protein S11 family protein | Chr3:19503324-19504701 FORWARD LENGTH=150 | 201606	16285	10.6	302.59	7	5	2.5	38
AT5G19510.1	| Translation elongation factor EF1B/ribosomal protein S6 family protein | Chr5:6581854-6583137 REVERSE LENGTH=224 | 201606	24243	4.42	362.01	7	5	1.78	35.7
AT5G39850.1	| Ribosomal protein S4 | Chr5:15950053-15951171 FORWARD LENGTH=197 | 201606	23203	10.34	240.97	7	5	2.46	29.4
AT5G13490.1	| ADP/ATP carrier 2 | Chr5:4336034-4337379 FORWARD LENGTH=385 | 201606	41834	9.79	213.93	7	4	0.64	11.7
AT1G66280.1	| Glycosyl hydrolase superfamily protein | Chr1:24706759-24709737 REVERSE LENGTH=524 | 201606	60142	6.74	109.76	7	2	0.41	8.2
AT1G05190.1	| Ribosomal protein L6 family | Chr1:1502515-1503738 REVERSE LENGTH=223 | 201606	24747	9.89	329.38	6	6	1.72	32.3
AT1G10630.1	| ADP-ribosylation factor A1F | Chr1:3513189-3514230 REVERSE LENGTH=181 | 201606	20667	6.43	383.12	6	6	3.91	44.2
AT1G20630.1	| catalase 1 | Chr1:7146812-7149609 FORWARD LENGTH=492 | 201606	57068	6.95	318.48	6	6	0.67	17.3
AT1G20950.1	| Phosphofructokinase family protein | Chr1:7297467-7301336 REVERSE LENGTH=614 | 201606	67875	6.53	355.44	6	6	0.54	16
AT1G51710.1	| ubiquitin-specific protease 6 | Chr1:19175805-19179894 REVERSE LENGTH=482 | 201606	54004	5.82	330.07	6	6	0.71	15.1
AT1G53750.1	| regulatory particle triple-A 1A | Chr1:20065921-20068324 REVERSE LENGTH=426 | 201606	48286	6.33	262.39	6	6	1.17	24.4
AT1G74910.1	| ADP-glucose pyrophosphorylase family protein | Chr1:28135770-28138456 REVERSE LENGTH=415 | 201606	45934	6.76	354.32	6	6	0.88	19.3
AT1G80410.1	| tetratricopeptide repeat (TPR)-containing protein | Chr1:30227963-30234832 REVERSE LENGTH=897 | 201606	102824	7.59	344.23	6	6	0.44	11.7
AT2G15620.1	| nitrite reductase 1 | Chr2:6810552-6812666 FORWARD LENGTH=586 | 201606	65977	5.95	311.2	6	6	0.56	15
AT2G30110.1	| ubiquitin-activating enzyme 1 | Chr2:12852632-12857369 REVERSE LENGTH=1080 | 201606	121202	5.11	243.57	6	6	0.27	6.8
AT2G30950.1	| FtsH extracellular protease family | Chr2:13174692-13177064 FORWARD LENGTH=695 | 201606	74282	6	319.08	6	6	0.4	11.5
AT2G34560.1	| P-loop containing nucleoside triphosphate hydrolases superfamily protein | Chr2:14560266-14562695 FORWARD LENGTH=384 | 201606	42960	5.57	291.83	6	6	1.16	24.5
AT2G36250.1	| Tubulin/FtsZ family protein | Chr2:15197661-15199932 REVERSE LENGTH=478 | 201606	50747	5.56	452.4	6	6	0.63	16.7
AT2G39770.1	| Glucose-1-phosphate adenylyltransferase family protein | Chr2:16589401-16590741 FORWARD LENGTH=361 | 201606	39837	6.28	258.6	6	6	0.87	21.3
AT2G42740.1	| ribosomal protein large subunit 16A | Chr2:17791794-17792946 FORWARD LENGTH=182 | 201606	20989	9.94	314.69	6	6	3.79	38.5
AT2G43030.1	| Ribosomal protein L3 family protein | Chr2:17894898-17895713 FORWARD LENGTH=271 | 201606	29345	10.43	340.8	6	6	1.33	24.7
AT2G44060.1	| Late embryogenesis abundant protein%2C group 2 | Chr2:18226922-18227988 FORWARD LENGTH=325 | 201606	36185	4.69	287.88	6	6	1.23	25.5
AT3G06580.1	| Mevalonate/galactokinase family protein | Chr3:2049141-2051867 REVERSE LENGTH=496 | 201606	55048	5.67	374.37	6	6	0.7	21.2
AT3G07110.1	| Ribosomal protein L13 family protein | Chr3:2252092-2253332 FORWARD LENGTH=206 | 201606	23679	10.41	447.84	6	6	2.39	44.2
AT3G08740.1	| elongation factor P (EF-P) family protein | Chr3:2654788-2656154 REVERSE LENGTH=236 | 201606	26439	8.61	325.78	6	6	1.55	24.2
AT3G14600.1	| Ribosomal protein L18ae/LX family protein | Chr3:4910773-4911933 FORWARD LENGTH=178 | 201606	21466	10.35	261.5	6	6	2.83	29.8
AT3G18000.1	| S-adenosyl-L-methionine-dependent methyltransferases superfamily protein | Chr3:6154578-6157331 FORWARD LENGTH=491 | 201606	56694	5.39	338.15	6	6	1.08	22.4
AT4G04910.1	| AAA-type ATPase family protein | Chr4:2489696-2495666 REVERSE LENGTH=742 | 201606	81949	5.74	276.6	6	6	0.36	12.8
AT4G09650.1	| F-type H+-transporting ATPase subunit delta | Chr4:6100799-6101503 FORWARD LENGTH=234 | 201606	25653	9.04	426.2	6	6	2.08	42.3
AT4G13930.1	| serine hydroxymethyltransferase 4 | Chr4:8048013-8050021 REVERSE LENGTH=471 | 201606	52141	6.8	398.82	6	6	0.61	19.5
AT4G17190.1	| farnesyl diphosphate synthase 2 | Chr4:9648743-9650865 REVERSE LENGTH=342 | 201606	40256	5.53	274.27	6	6	0.85	16.7
AT4G22010.1	| SKU5 similar 4 | Chr4:11663429-11666463 FORWARD LENGTH=541 | 201606	60589	9.9	227.68	6	6	0.62	15.2
AT4G30190.1	| H[+]-ATPase 2 | Chr4:14770820-14775920 REVERSE LENGTH=948 | 201606	104734	6.54	304.6	6	6	0.27	8.3
AT4G38630.1	| regulatory particle non-ATPase 10 | Chr4:18057357-18059459 REVERSE LENGTH=386 | 201606	40903	4.47	299.96	6	6	0.84	17.4
AT5G11880.1	| Pyridoxal-dependent decarboxylase family protein | Chr5:3827806-3829942 REVERSE LENGTH=489 | 201606	54643	6.21	349	6	6	0.84	17.8
AT5G19760.1	| Mitochondrial substrate carrier family protein | Chr5:6679591-6681845 REVERSE LENGTH=298 | 201606	32347	9.35	334.84	6	6	1.16	22.1
AT5G20280.1	| sucrose phosphate synthase 1F | Chr5:6844994-6849997 REVERSE LENGTH=1043 | 201606	117818	6	220.92	6	6	0.24	5.7
AT5G56350.1	| Pyruvate kinase family protein | Chr5:22820254-22822529 REVERSE LENGTH=498 | 201606	55060	6.43	316.2	6	6	0.97	16.9
AT5G57870.1	| MIF4G domain-containing protein / MA3 domain-containing protein | Chr5:23439755-23443433 FORWARD LENGTH=780 | 201606	85917	8.43	304.36	6	6	0.34	9.9
AT5G60790.1	| ABC transporter family protein | Chr5:24453760-24455767 REVERSE LENGTH=595 | 201606	67356	6.03	254.06	6	6	0.45	11.1
AT5G67030.1	| zeaxanthin epoxidase (ZEP) (ABA1) | Chr5:26753745-26757090 REVERSE LENGTH=667 | 201606	74366	6.6	348.08	6	6	0.48	13
ATCG00130.1	| ATPase%2C F0 complex%2C subunit B/B~%2C bacterial/chloroplast | ChrC:11529-12798 REVERSE LENGTH=184 | 201606	21101	7.85	397.16	6	6	2.91	53.3
AT1G09430.1	| ATP-citrate lyase A-3 | Chr1:3042135-3044978 FORWARD LENGTH=424 | 201606	47315	5.16	216.58	6	5	0.69	13.2
AT1G19920.1	| Pseudouridine synthase/archaeosine transglycosylase-like family protein | Chr1:6914835-6916657 REVERSE LENGTH=476 | 201606	53718	6.15	279.44	6	5	0.47	10.7
AT1G35160.1	| GF14 protein phi chain | Chr1:12867264-12868514 FORWARD LENGTH=267 | 201606	30289	4.79	275.33	6	5	2.41	31.5
AT1G52570.1	| phospholipase D alpha 2 | Chr1:19583940-19586551 REVERSE LENGTH=810 | 201606	92167	5.82	323.05	6	5	0.25	6.9
AT2G18110.1	| Translation elongation factor EF1B/ribosomal protein S6 family protein | Chr2:7872636-7873713 FORWARD LENGTH=231 | 201606	25365	4.49	229.92	6	5	1.25	20.3
AT3G05530.1	| regulatory particle triple-A ATPase 5A | Chr3:1603540-1605993 FORWARD LENGTH=424 | 201606	47735	4.91	248.49	6	5	0.84	21.9
AT3G11400.1	| eukaryotic translation initiation factor 3G1 | Chr3:3578536-3580366 FORWARD LENGTH=294 | 201606	32865	8.31	297.83	6	5	0.88	17.7
AT3G56340.1	| Ribosomal protein S26e family protein | Chr3:20892309-20893343 REVERSE LENGTH=130 | 201606	14961	11.1	333.41	6	5	4.13	50
AT4G10450.1	| Ribosomal protein L6 family | Chr4:6463201-6464458 REVERSE LENGTH=194 | 201606	22074	9.52	246.04	6	5	2.68	25.3
AT4G14040.1	| selenium-binding protein 2 | Chr4:8100691-8102828 REVERSE LENGTH=487 | 201606	54302	5.75	334.07	6	5	0.58	14.2
AT4G14160.1	| Sec23/Sec24 protein transport family protein | Chr4:8167574-8173026 FORWARD LENGTH=773 | 201606	86292	5.64	256.77	6	5	0.34	11.4
AT4G29410.1	| Ribosomal L28e protein family | Chr4:14468439-14469964 REVERSE LENGTH=143 | 201606	15958	11.04	299.66	6	5	2.59	31.5
AT5G15520.1	| Ribosomal protein S19e family protein | Chr5:5037242-5038136 REVERSE LENGTH=143 | 201606	15864	10.14	267.43	6	5	2.62	36.4
AT5G47880.1	| eukaryotic release factor 1-1 | Chr5:19386555-19387865 REVERSE LENGTH=436 | 201606	48864	5.19	282.46	6	5	0.67	15.4
AT5G61170.1	| Ribosomal protein S19e family protein | Chr5:24611158-24612202 FORWARD LENGTH=143 | 201606	15744	10.22	282.5	6	5	3.74	48.3
AT3G04920.1	| Ribosomal protein S24e family protein | Chr3:1360989-1362065 FORWARD LENGTH=133 | 201606	15363	10.7	258.05	6	4	2.79	30.1
AT3G09790.1	| ubiquitin 8 | Chr3:3004111-3006006 REVERSE LENGTH=631 | 201606	72009	9.1	291.03	6	4	0.26	8.4
AT3G22230.1	| Ribosomal L27e protein family | Chr3:7844136-7844543 REVERSE LENGTH=135 | 201606	15719	10.28	209.64	6	4	2.66	31.9
AT3G45030.1	| Ribosomal protein S10p/S20e family protein | Chr3:16471606-16472312 REVERSE LENGTH=124 | 201606	13984	9.73	217.96	6	4	3.29	34.7
AT4G03280.1	| photosynthetic electron transfer C | Chr4:1440314-1441717 FORWARD LENGTH=229 | 201606	24635	8.8	336.62	6	4	0.95	24.9
AT5G02610.1	| Ribosomal L29 family protein | Chr5:587611-588547 FORWARD LENGTH=123 | 201606	14322	10.92	205.85	6	4	2.12	29.3
AT5G12110.1	| elongation factor 1-beta 1 | Chr5:3914483-3915732 FORWARD LENGTH=228 | 201606	24773	4.53	317.62	6	4	0.95	31.1
AT1G07070.1	| Ribosomal protein L35Ae family protein | Chr1:2168652-2169703 FORWARD LENGTH=112 | 201606	12897	10.68	134.61	6	3	1.58	20.5
AT1G41880.1	| Ribosomal protein L35Ae family protein | Chr1:15651585-15652427 REVERSE LENGTH=111 | 201606	12848	10.68	122.65	6	3	1.58	20.7
AT1G04170.1	| eukaryotic translation initiation factor 2 gamma subunit | Chr1:1097423-1099702 FORWARD LENGTH=465 | 201606	51334	8.96	250.91	5	5	0.76	17.4
AT1G04690.1	| potassium channel beta subunit 1 | Chr1:1313662-1315420 FORWARD LENGTH=328 | 201606	36744	6.97	374.39	5	5	0.76	15.2
AT1G12270.1	| stress-inducible protein | Chr1:4172105-4174575 FORWARD LENGTH=572 | 201606	64829	5.94	232.9	5	5	0.47	13.3
AT1G25490.1	| ARM repeat superfamily protein | Chr1:8951700-8954899 FORWARD LENGTH=588 | 201606	66307	4.94	306.34	5	5	0.46	14.6
AT1G36160.1	| acetyl-CoA carboxylase 1 | Chr1:13534196-13543773 FORWARD LENGTH=2254 | 201606	252819	6.09	238.3	5	5	0.12	5
AT1G48860.1	| RNA 3~-terminal phosphate cyclase/enolpyruvate transferase%2C alpha/beta | Chr1:18068892-18071331 REVERSE LENGTH=521 | 201606	56366	6.37	268.63	5	5	0.45	13.2
AT1G54010.1	| GDSL-like Lipase/Acylhydrolase superfamily protein | Chr1:20158854-20160747 REVERSE LENGTH=386 | 201606	43572	8.33	299.68	5	5	0.61	18.4
AT1G64520.1	| regulatory particle non-ATPase 12A | Chr1:23956459-23958120 FORWARD LENGTH=267 | 201606	30915	4.81	330.22	5	5	0.95	24
AT1G74470.1	| Pyridine nucleotide-disulfide oxidoreductase family protein | Chr1:27991248-27992845 FORWARD LENGTH=467 | 201606	52204	9.03	278.44	5	5	0.89	16.1
AT1G75990.1	| PAM domain (PCI/PINT associated module) protein | Chr1:28524623-28526718 REVERSE LENGTH=487 | 201606	55899	8.52	374.03	5	5	0.68	18.1
AT2G19940.2	| Putative N-acetyl-gamma-glutamyl-phosphate reductase | Chr2:8613168-8615649 FORWARD LENGTH=401 | 201606	44348	8.18	297.08	5	5	0.75	17.2
AT2G33150.1	| peroxisomal 3-ketoacyl-CoA thiolase 3 | Chr2:14047814-14050983 REVERSE LENGTH=462 | 201606	49061	8.62	279.19	5	5	0.66	14.5
AT2G33800.1	| Ribosomal protein S5 family protein | Chr2:14300925-14302352 REVERSE LENGTH=303 | 201606	32682	8.99	288.21	5	5	1.14	23.8
AT2G34970.1	| Trimeric LpxA-like enzyme | Chr2:14746340-14748532 FORWARD LENGTH=730 | 201606	82553	4.55	251.16	5	5	0.29	12.6
AT2G36530.1	| Enolase | Chr2:15321081-15323786 REVERSE LENGTH=444 | 201606	47974	5.54	351.75	5	5	0.83	22.1
AT2G38230.1	| pyridoxine biosynthesis 1.1 | Chr2:16011475-16012404 FORWARD LENGTH=309 | 201606	33126	5.75	319.15	5	5	0.87	15.9
AT2G40060.1	| Clathrin light chain protein | Chr2:16726564-16728001 FORWARD LENGTH=258 | 201606	28876	4.9	240.61	5	5	1.36	22.5
AT3G02080.1	| Ribosomal protein S19e family protein | Chr3:364138-365161 REVERSE LENGTH=143 | 201606	15875	10.09	261.55	5	5	2.62	36.4
AT3G06650.1	| ATP-citrate lyase B-1 | Chr3:2079247-2082633 REVERSE LENGTH=608 | 201606	66342	7.92	360.9	5	5	0.46	11
AT3G11630.1	| Thioredoxin superfamily protein | Chr3:3672189-3673937 FORWARD LENGTH=266 | 201606	29188	6.92	274.33	5	5	1.03	28.2
AT3G13300.1	| Transducin/WD40 repeat-like superfamily protein | Chr3:4304085-4309949 FORWARD LENGTH=1344 | 201606	146599	5.73	249.05	5	5	0.22	6.2
AT3G13870.1	| Root hair defective 3 GTP-binding protein (RHD3) | Chr3:4565762-4571109 REVERSE LENGTH=802 | 201606	89606	5.44	245.88	5	5	0.26	9.1
AT3G19450.1	| GroES-like zinc-binding alcohol dehydrogenase family protein | Chr3:6744859-6747005 FORWARD LENGTH=365 | 201606	39700	5.33	291.2	5	5	0.68	15.1
AT3G22960.1	| Pyruvate kinase family protein | Chr3:8139369-8141771 FORWARD LENGTH=596 | 201606	65603	5.64	185.9	5	5	0.29	8.6
AT3G27830.1	| ribosomal protein L12-A | Chr3:10318576-10319151 FORWARD LENGTH=191 | 201606	20063	5.51	302.41	5	5	2.41	31.4
AT3G42050.1	| vacuolar ATP synthase subunit H family protein | Chr3:14228846-14232228 REVERSE LENGTH=441 | 201606	50709	6.58	291.19	5	5	0.51	11.1
AT3G45140.1	| lipoxygenase 2 | Chr3:16525437-16529233 FORWARD LENGTH=896 | 201606	102552	5.43	182.68	5	5	0.23	5.5
AT3G58570.1	| P-loop containing nucleoside triphosphate hydrolases superfamily protein | Chr3:21657099-21660352 FORWARD LENGTH=646 | 201606	69484	7.67	262.13	5	5	0.43	9.8
AT4G02930.1	| GTP binding Elongation factor Tu family protein | Chr4:1295751-1298354 REVERSE LENGTH=454 | 201606	49607	6.25	380.7	5	5	0.65	17.2
AT4G13170.1	| Ribosomal protein L13 family protein | Chr4:7655133-7656542 REVERSE LENGTH=206 | 201606	23842	10.39	365.44	5	5	1.82	33.5
AT4G13780.1	| methionine-tRNA ligase%2C putative / methionyl-tRNA synthetase%2C putative / MetRS | Chr4:7993366-7998433 REVERSE LENGTH=797 | 201606	91051	6.64	285.04	5	5	0.32	9.2
AT4G16130.1	| arabinose kinase | Chr4:9120875-9127656 FORWARD LENGTH=1039 | 201606	115443	5.89	258.97	5	5	0.38	11.5
AT4G17190.3	| farnesyl diphosphate synthase 2 | Chr4:9648743-9650669 REVERSE LENGTH=305 | 201606	35844	5.79	244.26	5	5	0.78	17.4
AT4G19710.2	| aspartate kinase-homoserine dehydrogenase ii | Chr4:10725229-10729536 FORWARD LENGTH=916 | 201606	100928	7.23	181.72	5	5	0.28	7.6
AT4G20980.1	| Eukaryotic translation initiation factor 3 subunit 7 (eIF-3) | Chr4:11216997-11218772 FORWARD LENGTH=591 | 201606	66911	5.54	272.04	5	5	0.36	10.5
AT4G35250.1	| NAD(P)-binding Rossmann-fold superfamily protein | Chr4:16771401-16773269 REVERSE LENGTH=395 | 201606	44152	8.71	248	5	5	0.6	12.4
AT5G05780.1	| RP non-ATPase subunit 8A | Chr5:1735862-1738176 FORWARD LENGTH=308 | 201606	34706	6.06	292.08	5	5	0.81	21.8
AT5G06290.1	| 2-cysteine peroxiredoxin B | Chr5:1919380-1921211 FORWARD LENGTH=273 | 201606	29932	5.55	265.8	5	5	0.99	27.5
AT5G08570.1	| Pyruvate kinase family protein | Chr5:2778433-2780300 FORWARD LENGTH=510 | 201606	55569	5.93	225.24	5	5	0.69	13.9
AT5G09590.1	| mitochondrial HSO70 2 | Chr5:2975721-2978508 FORWARD LENGTH=682 | 201606	73174	5.63	209.15	5	5	0.41	10
AT5G19940.1	| Plastid-lipid associated protein PAP / fibrillin family protein | Chr5:6739693-6740661 FORWARD LENGTH=239 | 201606	26580	9.49	276.78	5	5	1.18	26.8
AT5G20010.1	| RAS-related nuclear protein-1 | Chr5:6760364-6761747 FORWARD LENGTH=221 | 201606	25602	6.38	260.14	5	5	1.23	29.9
AT5G20490.1	| myosin family protein with Dil | Chr5:6927064-6936543 REVERSE LENGTH=1530 | 201606	174563	8.57	163.17	5	5	0.21	6.3
AT5G23540.1	| Mov34/MPN/PAD-1 family protein | Chr5:7937772-7939339 FORWARD LENGTH=308 | 201606	34389	6.31	222.29	5	5	1.06	25.6
AT5G24710.1	| Transducin/WD40 repeat-like superfamily protein | Chr5:8459148-8467920 REVERSE LENGTH=1377 | 201606	148890	6.27	173.6	5	5	0.18	5.7
AT5G28840.1	| GDP-D-mannose 3~%2C5~-epimerase | Chr5:10862472-10864024 REVERSE LENGTH=377 | 201606	43130	5.85	321.73	5	5	0.78	18.3
AT5G43780.1	| Pseudouridine synthase/archaeosine transglycosylase-like family protein | Chr5:17589631-17591480 REVERSE LENGTH=469 | 201606	52150	8.89	247.34	5	5	0.49	9.8
AT5G43940.1	| GroES-like zinc-binding dehydrogenase family protein | Chr5:17684265-17686379 FORWARD LENGTH=379 | 201606	41528	6.51	229.06	5	5	1.01	28.2
AT5G43940.2	| GroES-like zinc-binding dehydrogenase family protein | Chr5:17684265-17686379 FORWARD LENGTH=391 | 201606	42872	6.51	229.06	5	5	0.79	22.5
AT5G47210.1	| Hyaluronan / mRNA binding family | Chr5:19169222-19171012 REVERSE LENGTH=357 | 201606	37977	8.75	301.27	5	5	0.55	11.5
AT5G47770.1	| farnesyl diphosphate synthase 1 | Chr5:19345297-19347415 FORWARD LENGTH=384 | 201606	44860	6.57	234.63	5	5	0.74	15.6
AT5G48760.1	| Ribosomal protein L13 family protein | Chr5:19771315-19772686 REVERSE LENGTH=206 | 201606	23803	10.39	359.74	5	5	1.83	35.9
AT5G53480.1	| ARM repeat superfamily protein | Chr5:21714016-21716709 FORWARD LENGTH=870 | 201606	97167	4.71	268.15	5	5	0.29	8.5
AT5G58490.1	| NAD(P)-binding Rossmann-fold superfamily protein | Chr5:23643068-23644455 FORWARD LENGTH=324 | 201606	36190	5.62	167.67	5	5	0.77	15.7
AT5G62790.1	| 1-deoxy-D-xylulose 5-phosphate reductoisomerase | Chr5:25214358-25217292 REVERSE LENGTH=477 | 201606	52273	6.58	258.02	5	5	0.74	19.1
AT5G63420.1	| RNA-metabolising metallo-beta-lactamase family protein | Chr5:25400515-25405807 FORWARD LENGTH=911 | 201606	101061	8.42	157.85	5	5	0.23	6.3
AT5G67630.1	| P-loop containing nucleoside triphosphate hydrolases superfamily protein | Chr5:26967535-26969306 REVERSE LENGTH=469 | 201606	52366	5.43	275.9	5	5	0.49	12.6
ATCG00780.1	| ribosomal protein L14 | ChrC:80696-81064 REVERSE LENGTH=122 | 201606	13687	9.39	286.64	5	5	4.99	50
ATCG00900.1	| Ribosomal protein S7p/S5e family protein | ChrC:97478-97945 REVERSE LENGTH=155 | 201606	17347	11.28	298.04	5	5	3.13	40.6
AT1G07770.1	| ribosomal protein S15A | Chr1:2408413-2409065 REVERSE LENGTH=130 | 201606	14852	9.9	187.69	5	4	4.19	44.6
AT1G15820.1	| light harvesting complex photosystem II subunit 6 | Chr1:5446685-5447676 REVERSE LENGTH=258 | 201606	27505	6.75	276.7	5	4	0.82	16.7
AT1G65980.1	| thioredoxin-dependent peroxidase 1 | Chr1:24559524-24560753 REVERSE LENGTH=162 | 201606	17531	5.17	181.06	5	4	1.55	30.2
AT1G71500.1	| Rieske (2Fe-2S) domain-containing protein | Chr1:26936084-26937331 FORWARD LENGTH=287 | 201606	31879	8.88	277.47	5	4	1.18	23.3
AT2G38750.1	| annexin 4 | Chr2:16196582-16198431 REVERSE LENGTH=319 | 201606	36370	6.88	187.95	5	4	0.77	20.4
AT2G40590.1	| Ribosomal protein S26e family protein | Chr2:16945215-16946345 REVERSE LENGTH=131 | 201606	15062	11.09	243.59	5	4	2.87	49.6
AT3G26618.1	| eukaryotic release factor 1-3 | Chr3:9788854-9790161 FORWARD LENGTH=435 | 201606	49148	5.38	222.48	5	4	0.4	9.2
AT3G62030.1	| rotamase CYP 4 | Chr3:22973708-22975139 FORWARD LENGTH=260 | 201606	28532	8.83	199.39	5	4	1.38	19.6
AT4G13430.1	| isopropyl malate isomerase large subunit 1 | Chr4:7804194-7807789 REVERSE LENGTH=509 | 201606	55834	8.08	334.85	5	4	0.45	17.9
AT5G01410.1	| Aldolase-type TIM barrel family protein | Chr5:172576-173505 REVERSE LENGTH=309 | 201606	33480	5.79	258.49	5	4	0.64	15.9
AT5G20980.1	| methionine synthase 3 | Chr5:7124397-7128353 REVERSE LENGTH=812 | 201606	90993	8.17	323.79	5	4	0.26	7.1
AT5G28060.1	| Ribosomal protein S24e family protein | Chr5:10069791-10070792 REVERSE LENGTH=133 | 201606	15467	10.53	252.09	5	4	1.88	26.3
AT5G50850.1	| Transketolase family protein | Chr5:20689671-20692976 FORWARD LENGTH=363 | 201606	39436	5.67	301.69	5	4	0.52	16.5
AT1G09590.1	| Translation protein SH3-like family protein | Chr1:3106549-3107606 FORWARD LENGTH=164 | 201606	18698	10.46	152.35	5	3	1.41	20.7
AT1G27450.1	| adenine phosphoribosyl transferase 1 | Chr1:9532042-9533807 FORWARD LENGTH=243 | 201606	26607	8.65	194.24	5	3	0.86	29.6
AT3G47370.1	| Ribosomal protein S10p/S20e family protein | Chr3:17453671-17454437 REVERSE LENGTH=122 | 201606	13799	9.73	168.57	5	3	2.27	26.2
AT4G28390.1	| ADP/ATP carrier 3 | Chr4:14041486-14042781 REVERSE LENGTH=379 | 201606	40863	9.78	164.12	5	3	0.5	11.3
AT3G09680.1	| Ribosomal protein S12/S23 family protein | Chr3:2969197-2970291 REVERSE LENGTH=142 | 201606	15931	10.3	139.47	5	2	0.67	21.8
AT1G02920.1	| glutathione S-transferase 7 | Chr1:658886-659705 REVERSE LENGTH=209 | 201606	23583	6.14	253.16	4	4	1.01	16.7
AT1G06410.1	| trehalose-phosphatase/synthase 7 | Chr1:1955413-1958153 FORWARD LENGTH=851 | 201606	97653	5.59	189.38	4	4	0.29	10.3
AT1G07320.1	| ribosomal protein L4 | Chr1:2249190-2250189 FORWARD LENGTH=282 | 201606	30540	8.92	258.97	4	4	0.97	20.6
AT1G10670.1	| ATP-citrate lyase A-1 | Chr1:3535787-3538098 FORWARD LENGTH=423 | 201606	46991	5.39	174.51	4	4	0.42	7.3
AT1G10840.1	| translation initiation factor 3 subunit H1 | Chr1:3607885-3610299 REVERSE LENGTH=337 | 201606	38747	4.83	165.76	4	4	0.9	18.7
AT1G13320.1	| protein phosphatase 2A subunit A3 | Chr1:4563692-4567348 REVERSE LENGTH=587 | 201606	66216	4.94	215.98	4	4	0.37	11.1
AT1G14610.1	| valyl-tRNA synthetase / valine-tRNA ligase (VALRS) | Chr1:5008502-5014486 REVERSE LENGTH=1108 | 201606	126816	6.69	190.72	4	4	0.14	6
AT1G14810.1	| semialdehyde dehydrogenase family protein | Chr1:5102684-5104633 REVERSE LENGTH=375 | 201606	41005	6.52	342.89	4	4	0.5	18.7
AT1G17470.1	| developmentally regulated G-protein 1 | Chr1:6003442-6006155 FORWARD LENGTH=399 | 201606	45010	8.85	182.11	4	4	0.45	11.3
AT1G22410.1	| Class-II DAHP synthetase family protein | Chr1:7912120-7914742 FORWARD LENGTH=527 | 201606	58689	8.57	148.14	4	4	0.53	10.2
AT1G24020.1	| MLP-like protein 423 | Chr1:8500653-8501458 REVERSE LENGTH=155 | 201606	17044	5.1	207.28	4	4	1.61	29
AT1G30630.1	| Coatomer epsilon subunit | Chr1:10858546-10860173 REVERSE LENGTH=292 | 201606	32809	5.33	203.27	4	4	1.13	21.6
AT1G31730.1	| Adaptin family protein | Chr1:11359907-11363916 FORWARD LENGTH=938 | 201606	104411	5.33	186.53	4	4	0.17	9.2
AT1G34430.1	| 2-oxoacid dehydrogenases acyltransferase family protein | Chr1:12588027-12590084 REVERSE LENGTH=465 | 201606	48334	8.8	215.04	4	4	0.41	9.5
AT1G37130.1	| nitrate reductase 2 | Chr1:14158617-14161652 FORWARD LENGTH=917 | 201606	103691	6.09	162.61	4	4	0.22	5.6
AT1G43190.1	| polypyrimidine tract-binding protein 3 | Chr1:16275432-16278185 REVERSE LENGTH=432 | 201606	48659	6.35	197.36	4	4	0.29	10.6
AT1G48830.1	| Ribosomal protein S7e family protein | Chr1:18059854-18060935 REVERSE LENGTH=191 | 201606	21909	9.8	176.1	4	4	1.56	22.5
AT1G52510.1	| alpha/beta-Hydrolases superfamily protein | Chr1:19563039-19565260 REVERSE LENGTH=380 | 201606	41927	6.56	239.59	4	4	0.48	16.3
AT1G54000.1	| GDSL-like Lipase/Acylhydrolase superfamily protein | Chr1:20154548-20156365 REVERSE LENGTH=391 | 201606	43622	6.65	300.02	4	4	0.61	20.2
AT1G56430.1	| nicotianamine synthase 4 | Chr1:21137023-21137997 FORWARD LENGTH=324 | 201606	36784	5.08	375.98	4	4	0.76	29.6
AT1G62390.1	| Octicosapeptide/Phox/Bem1p (PB1) domain-containing protein / tetratricopeptide repeat (TPR)-containing protein | Chr1:23084632-23086887 REVERSE LENGTH=751 | 201606	83170	5.45	265.88	4	4	0.49	14.1
AT1G70580.1	| alanine-2-oxoglutarate aminotransferase 2 | Chr1:26613222-26615845 FORWARD LENGTH=481 | 201606	53980	6.21	246.08	4	4	1	22.5
AT1G71820.1	| SEC6 | Chr1:27010022-27016745 FORWARD LENGTH=752 | 201606	86361	4.8	170.54	4	4	0.27	6.8
AT1G73230.1	| Nascent polypeptide-associated complex NAC | Chr1:27540506-27541364 REVERSE LENGTH=165 | 201606	17993	5.91	189.51	4	4	1.49	36.4
AT1G77940.1	| Ribosomal protein L7Ae/L30e/S12e/Gadd45 family protein | Chr1:29304116-29305288 REVERSE LENGTH=112 | 201606	12454	9.62	188.12	4	4	1.67	42
AT1G78380.1	| glutathione S-transferase TAU 19 | Chr1:29486659-29487819 REVERSE LENGTH=219 | 201606	25691	5.8	231.99	4	4	0.9	16
AT1G79870.1	| D-isomer specific 2-hydroxyacid dehydrogenase family protein | Chr1:30044794-30045851 FORWARD LENGTH=313 | 201606	34482	5.62	159.32	4	4	1.05	19.5
AT2G01690.1	| ARM repeat superfamily protein | Chr2:309144-313499 REVERSE LENGTH=743 | 201606	84259	5.76	165.16	4	4	0.28	8.6
AT2G14120.1	| dynamin related protein | Chr2:5954253-5960015 REVERSE LENGTH=780 | 201606	86932	5.95	248.86	4	4	0.27	8.2
AT2G19480.1	| nucleosome assembly protein 1%3B2 | Chr2:8438601-8441040 FORWARD LENGTH=379 | 201606	43687	4.32	247.84	4	4	0.61	15
AT2G21170.1	| triosephosphate isomerase | Chr2:9071047-9073106 REVERSE LENGTH=315 | 201606	33553	7.67	182.6	4	4	0.85	21.3
AT2G27600.1	| AAA-type ATPase family protein | Chr2:11781226-11783730 FORWARD LENGTH=435 | 201606	48734	6.5	189.88	4	4	0.67	16.3
AT2G41530.1	| S-formylglutathione hydrolase | Chr2:17323656-17325430 REVERSE LENGTH=284 | 201606	31921	5.91	281.51	4	4	0.68	17.3
AT2G45960.1	| plasma membrane intrinsic protein 1B | Chr2:18910450-18911703 FORWARD LENGTH=286 | 201606	30806	9.16	184.37	4	4	0.71	17.8
AT3G07770.1	| HEAT SHOCK PROTEIN 89.1 | Chr3:2479611-2483970 FORWARD LENGTH=799 | 201606	90739	5.26	308.87	4	4	0.26	6.6
AT3G10380.1	| subunit of exocyst complex 8 | Chr3:3219922-3228356 REVERSE LENGTH=1053 | 201606	117103	5.61	174.24	4	4	0.19	7.6
AT3G12050.1	| Aha1 domain-containing protein | Chr3:3839289-3841303 FORWARD LENGTH=360 | 201606	40331	5.7	256.77	4	4	0.85	21.9
AT3G13930.1	| Dihydrolipoamide acetyltransferase%2C long form protein | Chr3:4596240-4600143 FORWARD LENGTH=539 | 201606	58887	7.55	189.1	4	4	0.33	8.9
AT3G16470.2	| Mannose-binding lectin superfamily protein | Chr3:5596096-5597709 REVERSE LENGTH=297 | 201606	32021	5.35	318.43	4	4	0.68	19.5
AT3G17820.1	| glutamine synthetase 1.3 | Chr3:6097503-6099408 FORWARD LENGTH=354 | 201606	38798	5.72	191.56	4	4	0.7	16.1
AT3G18740.1	| Ribosomal protein L7Ae/L30e/S12e/Gadd45 family protein | Chr3:6453437-6453870 FORWARD LENGTH=112 | 201606	12443	9.71	283.86	4	4	1.67	37.5
AT3G23990.1	| heat shock protein 60 | Chr3:8669013-8672278 FORWARD LENGTH=577 | 201606	61584	5.66	269.41	4	4	0.4	10.6
AT3G25800.1	| protein phosphatase 2A subunit A2 | Chr3:9422822-9425783 REVERSE LENGTH=587 | 201606	66183	5.01	212.14	4	4	0.37	15.3
AT3G25920.1	| ribosomal protein L15 | Chr3:9491268-9492558 REVERSE LENGTH=277 | 201606	29860	10.77	316.54	4	4	1.29	27.1
AT3G26060.1	| Thioredoxin superfamily protein | Chr3:9524807-9526123 FORWARD LENGTH=216 | 201606	23834	9.53	172.06	4	4	1.37	27.3
AT3G43300.1	| HOPM interactor 7 | Chr3:15234235-15245034 REVERSE LENGTH=1758 | 201606	196643	5.39	199.14	4	4	0.16	6
AT3G44890.1	| ribosomal protein L9 | Chr3:16386505-16387963 FORWARD LENGTH=197 | 201606	22177	9.68	239.01	4	4	1.1	22.3
AT3G46740.1	| translocon at the outer envelope membrane of chloroplasts 75-III | Chr3:17216104-17219296 REVERSE LENGTH=818 | 201606	89589	8.93	185.5	4	4	0.26	7.1
AT3G48750.1	| cell division control 2 | Chr3:18072238-18074296 FORWARD LENGTH=294 | 201606	34123	6.42	191.61	4	4	0.84	16.3
AT3G51260.1	| 20S proteasome alpha subunit PAD1 | Chr3:19031086-19032746 FORWARD LENGTH=250 | 201606	27434	6.86	201.25	4	4	1.12	26.8
AT3G52880.1	| monodehydroascorbate reductase 1 | Chr3:19601477-19604366 REVERSE LENGTH=434 | 201606	46629	6.41	236.44	4	4	0.43	15.9
AT3G54470.1	| uridine 5~-monophosphate synthase / UMP synthase (PYRE-F) (UMPS) | Chr3:20168285-20170245 REVERSE LENGTH=476 | 201606	52159	6.77	191.88	4	4	0.49	11.3
AT3G54890.4	| chlorophyll a-b binding protein 6 | Chr3:20339881-20340922 REVERSE LENGTH=213 | 201606	23361	6.9	315.89	4	4	1.03	28.2
AT3G56190.1	| alpha-soluble NSF attachment protein 2 | Chr3:20846119-20848356 REVERSE LENGTH=289 | 201606	33190	5.21	177.29	4	4	0.86	19
AT3G57410.1	| villin 3 | Chr3:21243615-21249809 REVERSE LENGTH=965 | 201606	106853	5.6	199.91	4	4	0.22	6.5
AT3G58510.1	| DEA(D/H)-box RNA helicase family protein | Chr3:21640608-21643464 FORWARD LENGTH=612 | 201606	66327	6.23	216.87	4	4	0.37	10.3
AT3G61220.1	| NAD(P)-binding Rossmann-fold superfamily protein | Chr3:22663025-22664316 FORWARD LENGTH=296 | 201606	33068	5.38	224.21	4	4	0.87	27
AT3G61240.1	| DEA(D/H)-box RNA helicase family protein | Chr3:22666590-22669154 FORWARD LENGTH=498 | 201606	57309	8.66	199.35	4	4	0.34	12.4
AT3G62530.1	| ARM repeat superfamily protein | Chr3:23132219-23133121 FORWARD LENGTH=221 | 201606	24659	6.15	190.05	4	4	1.31	25.8
AT3G63490.1	| Ribosomal protein L1p/L10e family | Chr3:23444269-23446020 FORWARD LENGTH=346 | 201606	37780	9.3	256.08	4	4	0.93	30.1
AT4G02450.1	| HSP20-like chaperones superfamily protein | Chr4:1073987-1075765 REVERSE LENGTH=241 | 201606	25511	4.44	302.84	4	4	0.91	21.6
AT4G02510.1	| translocon at the outer envelope membrane of chloroplasts 159 | Chr4:1104766-1109360 FORWARD LENGTH=1503 | 201606	161006	4.43	232.32	4	4	0.14	4
AT4G03050.1	| 2-oxoglutarate-dependent dioxygenase | Chr4:1344182-1346127 FORWARD LENGTH=411 | 201606	45277	5.26	149.51	4	4	0.58	17
AT4G13770.1	| cytochrome P450%2C family 83%2C subfamily A%2C polypeptide 1 | Chr4:7990682-7992282 REVERSE LENGTH=502 | 201606	57697	8.63	208.62	4	4	0.54	13.9
AT4G18100.1	| Ribosomal protein L32e | Chr4:10035715-10036475 REVERSE LENGTH=133 | 201606	15550	10.89	211.25	4	4	1.86	29.3
AT4G22670.1	| HSP70-interacting protein 1 | Chr4:11918236-11920671 FORWARD LENGTH=441 | 201606	46648	4.83	272.44	4	4	0.43	15
AT4G23460.1	| Adaptin family protein | Chr4:12243899-12248898 REVERSE LENGTH=893 | 201606	99776	4.91	227.01	4	4	0.28	7.3
AT4G25740.1	| RNA binding Plectin/S10 domain-containing protein | Chr4:13107488-13108751 REVERSE LENGTH=177 | 201606	19549	9.69	225.92	4	4	0.88	27.1
AT4G27320.1	| Adenine nucleotide alpha hydrolases-like superfamily protein | Chr4:13678860-13680717 REVERSE LENGTH=260 | 201606	28317	5.79	152.3	4	4	0.79	24.6
AT4G29220.1	| phosphofructokinase 1 | Chr4:14403621-14406071 REVERSE LENGTH=473 | 201606	52415	7.22	183.23	4	4	0.49	12.7
AT4G29840.1	| Pyridoxal-5~-phosphate-dependent enzyme family protein | Chr4:14599434-14601014 REVERSE LENGTH=526 | 201606	58367	7.12	253.86	4	4	0.43	11
AT4G33010.1	| glycine decarboxylase P-protein 1 | Chr4:15926852-15931150 REVERSE LENGTH=1037 | 201606	113822	6.51	228.59	4	4	0.2	7.3
AT4G39200.1	| Ribosomal protein S25 family protein | Chr4:18257464-18258464 FORWARD LENGTH=108 | 201606	12046	10.7	287.35	4	4	2.83	40.7
AT5G04140.1	| glutamate synthase 1 | Chr5:1130031-1138186 FORWARD LENGTH=1622 | 201606	178066	5.94	187.8	4	4	0.12	3.3
AT5G11170.1	| DEAD/DEAH box RNA helicase family protein | Chr5:3553334-3556646 FORWARD LENGTH=427 | 201606	48820	5.42	155.89	4	4	0.67	13.8
AT5G13280.1	| aspartate kinase 1 | Chr5:4249516-4252654 FORWARD LENGTH=569 | 201606	62658	6.37	214.05	4	4	0.3	7
AT5G14320.1	| Ribosomal protein S13/S18 family | Chr5:4617839-4618772 REVERSE LENGTH=169 | 201606	19369	10.27	210.92	4	4	1.34	18.3
AT5G17020.1	| exportin 1A | Chr5:5594904-5602467 FORWARD LENGTH=1075 | 201606	123905	5.39	186.87	4	4	0.27	10.4
AT5G25754.1	| RNA polymerase I-associated factor PAF67 | Chr5:8953564-8955511 FORWARD LENGTH=514 | 201606	60657	5.88	208.13	4	4	0.51	12.6
AT5G26830.1	| Threonyl-tRNA synthetase | Chr5:9437351-9441568 FORWARD LENGTH=709 | 201606	81626	6.53	177.03	4	4	0.43	13.7
AT5G27540.1	| MIRO-related GTP-ase 1 | Chr5:9722816-9727112 FORWARD LENGTH=648 | 201606	73018	5.17	151.31	4	4	0.33	11.6
AT5G45620.1	| Proteasome component (PCI) domain protein | Chr5:18501590-18503868 FORWARD LENGTH=386 | 201606	44368	5.17	219.97	4	4	0.45	11.7
AT5G54160.1	| O-methyltransferase 1 | Chr5:21982075-21984167 FORWARD LENGTH=363 | 201606	40105	5.62	288.31	4	4	0.86	22
AT5G60540.1	| pyridoxine biosynthesis 2 | Chr5:24336874-24338647 REVERSE LENGTH=255 | 201606	27535	5.18	257.71	4	4	0.57	24.3
ATCG00020.1	| photosystem II reaction center protein A | ChrC:383-1444 REVERSE LENGTH=353 | 201606	39025	5.12	302.17	4	4	0.53	17.6
ATCG00380.1	| chloroplast ribosomal protein S4 | ChrC:45223-45828 REVERSE LENGTH=201 | 201606	23340	10.33	159.56	4	4	1.42	25.9
ATCG00770.1	| ribosomal protein S8 | ChrC:80068-80472 REVERSE LENGTH=134 | 201606	15527	10.94	201.81	4	4	3.84	47.8
ATCG00790.1	| ribosomal protein L16 | ChrC:81189-82652 REVERSE LENGTH=135 | 201606	15341	11.62	240.12	4	4	1.23	31.1
AT1G01960.1	| SEC7-like guanine nucleotide exchange family protein | Chr1:330830-337582 REVERSE LENGTH=1750 | 201606	196586	5.43	166.03	4	3	0.11	3.8
AT1G54290.1	| Translation initiation factor SUI1 family protein | Chr1:20268710-20269390 REVERSE LENGTH=113 | 201606	12697	8.54	111.64	4	3	0.9	19.5
AT1G63000.1	| nucleotide-rhamnose synthase/epimerase-reductase | Chr1:23342510-23343859 FORWARD LENGTH=301 | 201606	33861	5.73	193.66	4	3	0.44	15.9
AT2G21130.1	| Cyclophilin-like peptidyl-prolyl cis-trans isomerase family protein | Chr2:9055619-9056143 REVERSE LENGTH=174 | 201606	18680	8.33	196.35	4	3	0.93	20.7
AT2G27710.1	| 60S acidic ribosomal protein family | Chr2:11816929-11817670 FORWARD LENGTH=115 | 201606	11437	4.67	205.43	4	3	1.9	21.7
AT2G42590.1	| general regulatory factor 9 | Chr2:17732118-17733775 REVERSE LENGTH=263 | 201606	29616	4.86	147.13	4	3	0.52	8.4
AT3G02560.1	| Ribosomal protein S7e family protein | Chr3:542341-543168 FORWARD LENGTH=191 | 201606	22182	9.78	189.2	4	3	1.1	26.2
AT3G19480.1	| D-3-phosphoglycerate dehydrogenase | Chr3:6752590-6754650 FORWARD LENGTH=588 | 201606	62368	8.41	180.11	4	3	0.22	6.8
AT3G60190.1	| DYNAMIN-like 1E | Chr3:22244367-22247651 REVERSE LENGTH=624 | 201606	70103	7.17	152.32	4	3	0.35	8.5
AT4G11150.1	| vacuolar ATP synthase subunit E1 | Chr4:6800091-6801696 FORWARD LENGTH=230 | 201606	26272	6.04	151.92	4	3	0.87	20
AT4G18360.3	| Aldolase-type TIM barrel family protein | Chr4:10146983-10148386 REVERSE LENGTH=259 | 201606	29074	8.75	137.87	4	3	0.76	14.7
AT4G23670.1	| Polyketide cyclase/dehydrase and lipid transport superfamily protein | Chr4:12332846-12333656 REVERSE LENGTH=151 | 201606	17621	5.91	242.33	4	3	1.53	27.2
AT4G24830.1	| arginosuccinate synthase family | Chr4:12793085-12795857 REVERSE LENGTH=494 | 201606	54154	6.25	178.25	4	3	0.47	12.8
AT4G38740.1	| rotamase CYP 1 | Chr4:18083620-18084138 REVERSE LENGTH=172 | 201606	18589	7.68	177.25	4	3	0.94	25.6
AT5G01530.1	| light harvesting complex photosystem II | Chr5:209084-210243 FORWARD LENGTH=290 | 201606	31177	5.76	211.69	4	3	0.49	13.1
AT5G03650.1	| starch branching enzyme 2.2 | Chr5:931924-937470 FORWARD LENGTH=805 | 201606	92931	5.54	123.82	4	3	0.2	6.1
AT5G16130.1	| Ribosomal protein S7e family protein | Chr5:5268984-5269912 FORWARD LENGTH=190 | 201606	22104	9.75	153.86	4	3	1.54	25.3
AT5G19990.1	| regulatory particle triple-A ATPase 6A | Chr5:6752144-6754918 FORWARD LENGTH=419 | 201606	47389	8.96	155.44	4	3	0.55	18.4
AT5G23900.1	| Ribosomal protein L13e family protein | Chr5:8064176-8065081 REVERSE LENGTH=206 | 201606	23471	11	161.46	4	3	1.41	24.8
AT5G59880.1	| actin depolymerizing factor 3 | Chr5:24120382-24121628 FORWARD LENGTH=139 | 201606	16026	5.93	250.56	4	3	1.15	33.8
ATCG00470.1	| ATP synthase epsilon chain | ChrC:52265-52663 REVERSE LENGTH=132 | 201606	14547	5.84	198.45	4	3	1.32	25
AT4G22570.1	| adenine phosphoribosyl transferase 3 | Chr4:11882310-11885250 REVERSE LENGTH=183 | 201606	20567	5.83	87.49	4	2	0.49	14.8
AT1G02560.1	| nuclear encoded CLP protease 5 | Chr1:538000-539805 FORWARD LENGTH=298 | 201606	32506	8.35	144.01	3	3	0.46	14.4
AT1G02780.1	| Ribosomal protein L19e family protein | Chr1:608120-609391 REVERSE LENGTH=214 | 201606	24648	11.35	203.78	3	3	0.95	23.4
AT1G04190.1	| Tetratricopeptide repeat (TPR)-like superfamily protein | Chr1:1106617-1108557 REVERSE LENGTH=328 | 201606	37442	8.92	135.89	3	3	0.39	13.1
AT1G08250.1	| arogenate dehydratase 6 | Chr1:2588994-2590235 REVERSE LENGTH=413 | 201606	45059	6.11	158.19	3	3	0.32	9
AT1G08730.1	| Myosin family protein with Dil domain-containing protein | Chr1:2779963-2788325 FORWARD LENGTH=1538 | 201606	175998	9.12	104.63	3	3	0.1	3.1
AT1G12840.1	| vacuolar ATP synthase subunit C (VATC) / V-ATPase C subunit / vacuolar proton pump C subunit (DET3) | Chr1:4375584-4378220 FORWARD LENGTH=375 | 201606	42878	5.4	151.59	3	3	0.34	9.1
AT1G12920.1	| eukaryotic release factor 1-2 | Chr1:4396555-4397859 REVERSE LENGTH=434 | 201606	49082	5.25	183.45	3	3	0.4	9.2
AT1G15950.1	| cinnamoyl coa reductase 1 | Chr1:5478855-5481915 FORWARD LENGTH=344 | 201606	37864	6.13	145.79	3	3	0.55	11.9
AT1G16350.1	| Aldolase-type TIM barrel family protein | Chr1:5590951-5592872 FORWARD LENGTH=502 | 201606	54359	6.04	213.27	3	3	0.47	13.7
AT1G16460.1	| rhodanese homologue 2 | Chr1:5619848-5621981 REVERSE LENGTH=318 | 201606	34923	5.1	162.96	3	3	0.43	16.4
AT1G18270.1	| ketose-bisphosphate aldolase class-II family protein | Chr1:6283634-6293772 REVERSE LENGTH=1373 | 201606	147863	5.6	103.74	3	3	0.12	6.2
AT1G23820.1	| spermidine synthase | Chr1:8420410-8422724 FORWARD LENGTH=334 | 201606	36986	4.72	161.11	3	3	0.4	12
AT1G24180.1	| Thiamin diphosphate-binding fold (THDP-binding) superfamily protein | Chr1:8560777-8563382 REVERSE LENGTH=393 | 201606	43787	8.03	110.01	3	3	0.33	8.9
AT1G31230.1	| aspartate kinase-homoserine dehydrogenase i | Chr1:11158744-11163055 REVERSE LENGTH=911 | 201606	100026	6.34	114.09	3	3	0.18	6.3
AT1G35680.1	| Ribosomal protein L21 | Chr1:13208777-13210246 FORWARD LENGTH=220 | 201606	24195	9.32	118.08	3	3	0.98	12.3
AT1G47128.1	| Granulin repeat cysteine protease family protein | Chr1:17283139-17285609 REVERSE LENGTH=462 | 201606	52131	5.27	219.05	3	3	0.49	16.2
AT1G47550.1	| exocyst complex component sec3A | Chr1:17457171-17463896 FORWARD LENGTH=887 | 201606	100742	5.57	169.8	3	3	0.13	4.3
AT1G48030.1	| mitochondrial lipoamide dehydrogenase 1 | Chr1:17717432-17719141 REVERSE LENGTH=507 | 201606	54239	6.96	148.18	3	3	0.58	11.2
AT1G48410.1	| Stabilizer of iron transporter SufD / Polynucleotidyl transferase | Chr1:17886285-17891892 REVERSE LENGTH=1048 | 201606	117201	9.38	155.75	3	3	0.11	5.9
AT1G50480.1	| 10-formyltetrahydrofolate synthetase | Chr1:18702064-18704687 FORWARD LENGTH=634 | 201606	68329	6.26	180.63	3	3	0.28	8.4
AT1G61580.1	| R-protein L3 B | Chr1:22720833-22722402 REVERSE LENGTH=390 | 201606	44974	10.13	170.63	3	3	0.32	9
AT1G62740.1	| stress-inducible protein | Chr1:23231026-23233380 FORWARD LENGTH=571 | 201606	64764	5.85	170.83	3	3	0.67	15.4
AT1G63660.1	| GMP synthase (glutamine-hydrolyzing)%2C putative / glutamine amidotransferase | Chr1:23604127-23607080 REVERSE LENGTH=534 | 201606	59677	6.08	195.56	3	3	0.23	8.2
AT1G65220.1	| ARM repeat superfamily protein | Chr1:24226204-24228799 FORWARD LENGTH=411 | 201606	47202	5.43	139.29	3	3	0.55	15.3
AT1G69410.1	| eukaryotic elongation factor 5A-3 | Chr1:26089301-26090194 FORWARD LENGTH=158 | 201606	17425	5.56	262.8	3	3	1.56	38.6
AT1G69620.1	| ribosomal protein L34 | Chr1:26189900-26191081 FORWARD LENGTH=119 | 201606	13699	11.6	133.78	3	3	1.45	27.7
AT1G69830.1	| alpha-amylase-like 3 | Chr1:26288518-26293003 REVERSE LENGTH=887 | 201606	100293	5.73	192.96	3	3	0.13	4.5
AT1G70770.1	| transmembrane protein (Protein of unknown function DUF2359%2C transmembrane) | Chr1:26688622-26691185 REVERSE LENGTH=610 | 201606	67165	8.98	158.34	3	3	0.45	13.1
AT1G72550.1	| tRNA synthetase beta subunit family protein | Chr1:27319947-27323908 REVERSE LENGTH=598 | 201606	68184	5.15	153.48	3	3	0.36	12.7
AT1G73110.1	| P-loop containing nucleoside triphosphate hydrolases superfamily protein | Chr1:27494344-27496844 REVERSE LENGTH=432 | 201606	48352	6.81	186.52	3	3	0.54	16.7
AT1G76850.1	| exocyst complex component sec5 | Chr1:28848013-28854282 FORWARD LENGTH=1090 | 201606	122681	5.57	114.99	3	3	0.11	2.7
AT1G79530.1	| glyceraldehyde-3-phosphate dehydrogenase of plastid 1 | Chr1:29916232-29919088 REVERSE LENGTH=422 | 201606	44974	8.75	254.05	3	3	0.74	14.7
AT1G79850.1	| ribosomal protein S17 | Chr1:30041473-30041922 REVERSE LENGTH=149 | 201606	16329	10.57	132.46	3	3	1.12	19.5
AT1G80480.1	| plastid transcriptionally active 17 | Chr1:30258272-30260570 REVERSE LENGTH=444 | 201606	49742	5.67	219.95	3	3	0.52	16.2
AT2G04390.1	| Ribosomal S17 family protein | Chr2:1527911-1528336 FORWARD LENGTH=141 | 201606	16037	10.04	146.38	3	3	1.78	30.5
AT2G04842.1	| threonyl-tRNA synthetase%2C putative / threonine-tRNA ligase | Chr2:1698466-1701271 REVERSE LENGTH=650 | 201606	75251	6.47	156.55	3	3	0.32	7.5
AT2G17390.1	| ankyrin repeat-containing 2B | Chr2:7555870-7557743 FORWARD LENGTH=344 | 201606	37047	4.37	278.66	3	3	0.56	14.2
AT2G26780.1	| ARM repeat superfamily protein | Chr2:11410125-11423598 FORWARD LENGTH=1826 | 201606	203592	6.21	131.52	3	3	0.09	2.7
AT2G27530.1	| Ribosomal protein L1p/L10e family | Chr2:11763443-11764570 REVERSE LENGTH=216 | 201606	24580	9.89	192.98	3	3	1.32	26.4
AT2G27820.1	| prephenate dehydratase 1 | Chr2:11856808-11858082 FORWARD LENGTH=424 | 201606	46472	6.46	158.19	3	3	0.31	10.8
AT2G30200.1	| EMBRYO DEFECTIVE 3147 | Chr2:12883162-12885482 REVERSE LENGTH=393 | 201606	41725	8.72	202	3	3	0.49	20.4
AT2G30490.1	| cinnamate-4-hydroxylase | Chr2:12993861-12995683 REVERSE LENGTH=505 | 201606	57984	8.89	158.97	3	3	0.24	7.1
AT2G31570.1	| glutathione peroxidase 2 | Chr2:13438211-13439775 REVERSE LENGTH=169 | 201606	19104	5.6	144.31	3	3	0.91	21.3
AT2G32080.1	| purin-rich alpha 1 | Chr2:13642716-13644036 REVERSE LENGTH=296 | 201606	32181	5.75	110.13	3	3	0.67	15.9
AT2G33210.1	| heat shock protein 60-2 | Chr2:14075093-14078568 REVERSE LENGTH=585 | 201606	62339	6.37	170.61	3	3	0.31	7.4
AT2G37220.1	| RNA-binding (RRM/RBD/RNP motifs) family protein | Chr2:15634980-15636331 REVERSE LENGTH=289 | 201606	30699	5.06	132.09	3	3	0.5	15.6
AT2G38040.1	| acetyl Co-enzyme a carboxylase carboxyltransferase alpha subunit | Chr2:15917612-15920749 FORWARD LENGTH=769 | 201606	85367	5.62	121.32	3	3	0.22	5.1
AT2G40660.1	| Nucleic acid-binding%2C OB-fold-like protein | Chr2:16966011-16968866 FORWARD LENGTH=389 | 201606	42290	6.98	175.3	3	3	0.34	17.5
AT2G41740.1	| villin 2 | Chr2:17410962-17416878 REVERSE LENGTH=976 | 201606	108403	5.18	171.31	3	3	0.17	4.8
AT2G43750.1	| O-acetylserine (thiol) lyase B | Chr2:18129604-18132322 REVERSE LENGTH=392 | 201606	41915	8.13	150.11	3	3	0.35	12
AT2G43910.1	| HARMLESS TO OZONE LAYER 1 | Chr2:18184658-18186951 REVERSE LENGTH=227 | 201606	25444	4.75	280.88	3	3	0.63	21.1
AT2G45810.1	| DEA(D/H)-box RNA helicase family protein | Chr2:18859836-18862318 FORWARD LENGTH=528 | 201606	60953	7.51	160.96	3	3	0.23	12.5
AT2G47390.1	| Prolyl oligopeptidase family protein | Chr2:19442278-19446253 REVERSE LENGTH=961 | 201606	106884	6	179.27	3	3	0.12	5
AT2G47510.1	| fumarase 1 | Chr2:19498614-19502020 FORWARD LENGTH=492 | 201606	53479	8.01	174.2	3	3	0.26	11.2
AT3G01780.1	| ARM repeat superfamily protein | Chr3:279171-283399 FORWARD LENGTH=1176 | 201606	132251	5.67	103.82	3	3	0.13	3.1
AT3G02260.3	| auxin transport protein (BIG) | Chr3:431152-448489 REVERSE LENGTH=5078 | 201606	572271	5.65	200.31	3	3	0.04	2.5
AT3G05560.1	| Ribosomal L22e protein family | Chr3:1614641-1615204 FORWARD LENGTH=124 | 201606	14066	9.57	210.87	3	3	4.67	42.7
AT3G06350.1	| dehydroquinate dehydratase%2C putative / shikimate dehydrogenase | Chr3:1924536-1927701 REVERSE LENGTH=603 | 201606	66097	6.41	153.6	3	3	0.21	5.8
AT3G06720.1	| importin alpha isoform 1 | Chr3:2120559-2123555 FORWARD LENGTH=532 | 201606	59235	5.14	155.37	3	3	0.23	12.6
AT3G08943.1	| ARM repeat superfamily protein | Chr3:2719198-2721911 REVERSE LENGTH=871 | 201606	97430	4.66	176.92	3	3	0.19	7.1
AT3G12390.1	| Nascent polypeptide-associated complex (NAC)%2C alpha subunit family protein | Chr3:3942344-3943595 FORWARD LENGTH=203 | 201606	21969	4.3	193.92	3	3	0.75	18.2
AT3G16450.1	| Mannose-binding lectin superfamily protein | Chr3:5588593-5589792 FORWARD LENGTH=300 | 201606	32003	5.06	164.74	3	3	0.47	16.3
AT3G20330.1	| PYRIMIDINE B | Chr3:7090354-7091904 REVERSE LENGTH=390 | 201606	43424	6.21	111.99	3	3	0.61	15.1
AT3G25860.1	| 2-oxoacid dehydrogenases acyltransferase family protein | Chr3:9460632-9462585 FORWARD LENGTH=480 | 201606	50106	8.33	276.21	3	3	0.39	16
AT3G44310.1	| nitrilase 1 | Chr3:15986901-15988841 FORWARD LENGTH=346 | 201606	38527	5.84	209.46	3	3	0.38	15
AT3G44720.1	| arogenate dehydratase 4 | Chr3:16271759-16273033 FORWARD LENGTH=424 | 201606	46352	6.05	168.95	3	3	0.31	10.8
AT3G45780.1	| phototropin 1 | Chr3:16818557-16823960 FORWARD LENGTH=996 | 201606	112246	7.54	148.51	3	3	0.16	8.8
AT3G46780.1	| plastid transcriptionally active 16 | Chr3:17228766-17231021 FORWARD LENGTH=510 | 201606	54325	8.9	189.4	3	3	0.47	15.3
AT3G48110.1	| glycine-tRNA ligase | Chr3:17763111-17770964 FORWARD LENGTH=1067 | 201606	120154	5.7	148.58	3	3	0.15	5.8
AT3G50590.2	| Transducin/WD40 repeat-like superfamily protein | Chr3:18771292-18779220 FORWARD LENGTH=1606 | 201606	176479	8.47	149.68	3	3	0.1	3.7
AT3G52340.1	| sucrose-6F-phosphate phosphohydrolase 2 | Chr3:19407412-19409182 FORWARD LENGTH=423 | 201606	49104	5.56	116.03	3	3	0.29	6.6
AT3G52750.1	| Tubulin/FtsZ family protein | Chr3:19549841-19552435 REVERSE LENGTH=473 | 201606	50400	5.68	207.6	3	3	0.28	13.3
AT3G54210.1	| Ribosomal protein L17 family protein | Chr3:20067672-20068385 REVERSE LENGTH=211 | 201606	23467	11.38	136.57	3	3	0.69	14.2
AT3G54600.1	| Class I glutamine amidotransferase-like superfamily protein | Chr3:20211048-20212876 FORWARD LENGTH=399 | 201606	43855	5.57	173.27	3	3	0.46	9.5
AT3G55440.1	| triosephosphate isomerase | Chr3:20553794-20556078 FORWARD LENGTH=254 | 201606	27380	5.39	155.85	3	3	0.57	18.1
AT3G56940.1	| dicarboxylate diiron protein%2C putative (Crd1) | Chr3:21076594-21078269 FORWARD LENGTH=409 | 201606	47885	8.55	155.01	3	3	0.41	13.4
AT3G58140.1	| phenylalanyl-tRNA synthetase class IIc family protein | Chr3:21529988-21532386 REVERSE LENGTH=429 | 201606	49620	5.98	145.92	3	3	0.29	7.2
AT3G58730.1	| vacuolar ATP synthase subunit D (VATD) / V-ATPase D subunit / vacuolar proton pump D subunit (VATPD) | Chr3:21718495-21719280 REVERSE LENGTH=261 | 201606	29098	9.52	136.05	3	3	0.53	10.7
AT3G59970.3	| methylenetetrahydrofolate reductase 1 | Chr3:22151303-22154323 FORWARD LENGTH=592 | 201606	66817	5.56	181.14	3	3	0.37	13.9
AT3G60240.2	| eukaryotic translation initiation factor 4G | Chr3:22261842-22268295 FORWARD LENGTH=1723 | 201606	188232	7.5	181.82	3	3	0.09	2.7
AT3G60330.1	| H[+]-ATPase 7 | Chr3:22298763-22303509 FORWARD LENGTH=961 | 201606	105909	6.38	166.05	3	3	0.13	4.6
AT3G61440.1	| cysteine synthase C1 | Chr3:22735885-22737792 FORWARD LENGTH=368 | 201606	40130	8.71	172.15	3	3	0.51	11.7
AT3G61470.1	| photosystem I light harvesting complex protein | Chr3:22745736-22747032 FORWARD LENGTH=257 | 201606	27851	6.9	164.36	3	3	0.56	30.4
AT3G63410.1	| S-adenosyl-L-methionine-dependent methyltransferases superfamily protein | Chr3:23415816-23417002 REVERSE LENGTH=338 | 201606	38131	9.19	201.63	3	3	0.38	13.6
AT4G02030.1	| Vps51/Vps67 family (components of vesicular transport) protein | Chr4:892262-897175 FORWARD LENGTH=780 | 201606	88746	5.9	148.86	3	3	0.26	6.3
AT4G02770.1	| photosystem I subunit D-1 | Chr4:1229247-1229873 REVERSE LENGTH=208 | 201606	22641	9.78	172.64	3	3	1.07	21.2
AT4G11380.1	| Adaptin family protein | Chr4:6920608-6925444 FORWARD LENGTH=894 | 201606	100050	4.93	199.82	3	3	0.28	9.8
AT4G14030.1	| selenium-binding protein 1 | Chr4:8098121-8100165 REVERSE LENGTH=490 | 201606	54422	5.37	194.46	3	3	0.26	8.2
AT4G14880.1	| O-acetylserine (thiol) lyase (OAS-TL) isoform A1 | Chr4:8518209-8520050 REVERSE LENGTH=322 | 201606	33898	5.91	171.58	3	3	0.44	13.7
AT4G17090.1	| chloroplast beta-amylase | Chr4:9605266-9607250 REVERSE LENGTH=548 | 201606	61713	6.59	141.14	3	3	0.22	8.8
AT4G24190.1	| Chaperone protein htpG family protein | Chr4:12551902-12555851 REVERSE LENGTH=823 | 201606	94203	4.94	145.98	3	3	0.25	7
AT4G24550.2	| Clathrin adaptor complexes medium subunit family protein | Chr4:12675873-12678903 FORWARD LENGTH=451 | 201606	50971	7.71	176.8	3	3	0.5	12.6
AT4G24800.1	| MA3 domain-containing protein | Chr4:12782463-12784902 FORWARD LENGTH=702 | 201606	77729	5	132.93	3	3	0.31	9.3
AT4G26110.1	| nucleosome assembly protein1%3B1 | Chr4:13232712-13235502 FORWARD LENGTH=372 | 201606	43199	4.38	156.96	3	3	0.33	8.3
AT4G26510.1	| uridine kinase-like 4 | Chr4:13384503-13387920 FORWARD LENGTH=469 | 201606	53232	6.37	111.15	3	3	0.26	10.2
AT4G26910.1	| Dihydrolipoamide succinyltransferase | Chr4:13520127-13522889 REVERSE LENGTH=464 | 201606	50028	9.08	139.66	3	3	0.28	5.6
AT4G26970.1	| aconitase 2 | Chr4:13543077-13548427 FORWARD LENGTH=995 | 201606	108983	6.71	103.75	3	3	0.17	6.3
AT4G27700.1	| Rhodanese/Cell cycle control phosphatase superfamily protein | Chr4:13826541-13827673 REVERSE LENGTH=224 | 201606	24971	8.78	153.39	3	3	0.94	26.8
AT4G31300.1	| N-terminal nucleophile aminohydrolases (Ntn hydrolases) superfamily protein | Chr4:15188927-15190935 FORWARD LENGTH=233 | 201606	25193	5.31	175.04	3	3	0.63	21
AT4G32180.1	| pantothenate kinase 2 | Chr4:15537724-15543715 REVERSE LENGTH=901 | 201606	100204	5.6	199.71	3	3	0.18	6.8
AT4G32260.1	| ATPase%2C F0 complex%2C subunit B/B~%2C bacterial/chloroplast | Chr4:15573859-15574586 REVERSE LENGTH=219 | 201606	23903	5.8	171.61	3	3	0.99	15.5
AT4G33250.1	| eukaryotic translation initiation factor 3K | Chr4:16039066-16040617 REVERSE LENGTH=226 | 201606	25826	4.92	148.86	3	3	0.61	14.2
AT4G34110.1	| poly(A) binding protein 2 | Chr4:16336732-16339892 FORWARD LENGTH=629 | 201606	68743	8.19	165.83	3	3	0.13	4
AT4G34230.1	| cinnamyl alcohol dehydrogenase 5 | Chr4:16386898-16388666 REVERSE LENGTH=357 | 201606	39346	5.42	127.43	3	3	0.37	9.8
AT4G34555.1	| Ribosomal protein S25 family protein | Chr4:16504381-16505339 REVERSE LENGTH=108 | 201606	12011	10.7	195.85	3	3	2.87	40.7
AT4G37910.1	| mitochondrial heat shock protein 70-1 | Chr4:17825368-17828099 REVERSE LENGTH=682 | 201606	73315	5.51	122.56	3	3	0.26	8.2
AT4G39260.1	| cold%2C circadian rhythm%2C and RNA binding 1 | Chr4:18274166-18274958 REVERSE LENGTH=169 | 201606	16626	5.58	170.26	3	3	1.09	12.4
AT4G39520.1	| GTP-binding protein-like protein | Chr4:18371329-18374000 REVERSE LENGTH=369 | 201606	41517	8.62	177.86	3	3	0.35	10.6
AT5G04130.1	| DNA GYRASE B2 | Chr5:1122084-1128031 REVERSE LENGTH=732 | 201606	81345	8.84	187	3	3	0.29	7.5
AT5G05470.1	| eukaryotic translation initiation factor 2 alpha subunit | Chr5:1620579-1622214 FORWARD LENGTH=344 | 201606	39061	5.23	164.65	3	3	0.37	9.9
AT5G05620.1	| gamma-tubulin complex protein 2 | Chr5:1679340-1681719 FORWARD LENGTH=474 | 201606	53643	5.69	118.43	3	3	0.26	12.2
AT5G09660.1	| peroxisomal NAD-malate dehydrogenase 2 | Chr5:2993645-2995551 REVERSE LENGTH=354 | 201606	37688	8.14	184.61	3	3	0.39	8.5
AT5G11490.1	| adaptin family protein | Chr5:3671964-3676144 FORWARD LENGTH=841 | 201606	94119	5.26	125.74	3	3	0.14	4.4
AT5G14590.1	| Isocitrate/isopropylmalate dehydrogenase family protein | Chr5:4703533-4706627 REVERSE LENGTH=485 | 201606	54504	8.05	145.77	3	3	0.36	9.3
AT5G22330.1	| P-loop containing nucleoside triphosphate hydrolases superfamily protein | Chr5:7391026-7394071 REVERSE LENGTH=458 | 201606	50577	5.67	128.8	3	3	0.39	11.1
AT5G22770.1	| alpha-adaptin | Chr5:7579844-7588026 REVERSE LENGTH=1012 | 201606	112934	5.85	147.47	3	3	0.16	7.1
AT5G23120.1	| photosystem II stability/assembly factor%2C chloroplast (HCF136) | Chr5:7778154-7780463 FORWARD LENGTH=403 | 201606	44133	6.79	147.33	3	3	0.33	11.7
AT5G26280.1	| TRAF-like family protein | Chr5:9208724-9210403 FORWARD LENGTH=350 | 201606	39421	8.46	126.02	3	3	0.52	14
AT5G27770.1	| Ribosomal L22e protein family | Chr5:9836166-9837113 FORWARD LENGTH=124 | 201606	14095	9.57	195.44	3	3	4.67	42.7
AT5G28500.1	| rubisco accumulation factor-like protein | Chr5:10477810-10479114 FORWARD LENGTH=434 | 201606	48321	4.99	171.87	3	3	0.29	10.1
AT5G37600.1	| hypothetical protein | Chr5:14933574-14935656 REVERSE LENGTH=356 | 201606	39318	5.28	150.1	3	3	0.23	12.4
AT5G38830.1	| Cysteinyl-tRNA synthetase%2C class Ia family protein | Chr5:15545764-15548094 REVERSE LENGTH=511 | 201606	58261	5.91	187.63	3	3	0.33	11.7
AT5G43830.1	| aluminum induced protein with YGL and LRDR motifs | Chr5:17622593-17624239 REVERSE LENGTH=251 | 201606	27720	6.38	137.13	3	3	0.81	16.3
AT5G43900.1	| myosin 2 | Chr5:17657241-17666653 REVERSE LENGTH=1505 | 201606	171534	7.78	122.89	3	3	0.1	5
AT5G44320.1	| Eukaryotic translation initiation factor 3 subunit 7 (eIF-3) | Chr5:17854901-17856667 REVERSE LENGTH=588 | 201606	66411	5.44	167.75	3	3	0.21	6.5
AT5G46430.1	| Ribosomal protein L32e | Chr5:18833429-18834409 FORWARD LENGTH=133 | 201606	15522	10.78	112.05	3	3	1.2	19.5
AT5G47010.1	| RNA helicase | Chr5:19072009-19078856 FORWARD LENGTH=1254 | 201606	138151	6.04	168.07	3	3	0.09	3.6
AT5G48230.2	| acetoacetyl-CoA thiolase 2 | Chr5:19552570-19555122 REVERSE LENGTH=403 | 201606	41842	6.46	159.43	3	3	0.35	6.9
AT5G49810.1	| methionine S-methyltransferase | Chr5:20239418-20246046 FORWARD LENGTH=1071 | 201606	119781	5.43	106.37	3	3	0.15	4.9
AT5G50950.2	| FUMARASE 2 | Chr5:20729687-20733636 FORWARD LENGTH=499 | 201606	54506	5.93	174.2	3	3	0.46	12.8
AT5G53460.1	| NADH-dependent glutamate synthase 1 | Chr5:21700518-21709629 FORWARD LENGTH=2208 | 201606	243741	5.97	194.03	3	3	0.09	3.1
AT5G54810.1	| tryptophan synthase beta-subunit 1 | Chr5:22264805-22266738 REVERSE LENGTH=470 | 201606	51179	6.36	181.61	3	3	0.38	9.6
AT5G56680.1	| Class II aminoacyl-tRNA and biotin synthetases superfamily protein | Chr5:22936645-22938841 FORWARD LENGTH=572 | 201606	64256	5.4	141.83	3	3	0.3	8.9
AT5G62670.1	| H[+]-ATPase 11 | Chr5:25159495-25164957 FORWARD LENGTH=956 | 201606	105398	6.14	168.88	3	3	0.17	5.1
ATCG00160.1	| ribosomal protein S2 | ChrC:15013-15723 REVERSE LENGTH=236 | 201606	27172	9.7	182.36	3	3	0.83	17.4
ATCG00270.1	| photosystem II reaction center protein D | ChrC:32711-33772 FORWARD LENGTH=353 | 201606	39750	5.46	132.02	3	3	0.37	9.1
ATCG01110.1	| NAD(P)H dehydrogenase subunit H | ChrC:122011-123192 REVERSE LENGTH=393 | 201606	45644	5.4	170.82	3	3	0.31	12.5
AT1G01510.1	| NAD(P)-binding Rossmann-fold superfamily protein | Chr1:187235-189836 FORWARD LENGTH=636 | 201606	70847	6.16	125.34	3	2	0.12	4.2
AT1G08360.1	| Ribosomal protein L1p/L10e family | Chr1:2636231-2637694 FORWARD LENGTH=216 | 201606	24624	9.89	110.7	3	2	0.95	18.5
AT1G24280.1	| glucose-6-phosphate dehydrogenase 3 | Chr1:8609495-8612383 FORWARD LENGTH=599 | 201606	67716	6.73	123.93	3	2	0.13	5
AT1G79330.1	| metacaspase 5 | Chr1:29838722-29840137 FORWARD LENGTH=410 | 201606	45217	6.17	103.62	3	2	0.1	5.9
AT5G20630.1	| germin 3 | Chr5:6975315-6975950 REVERSE LENGTH=211 | 201606	21993	6.26	124.08	3	2	0.45	16.1
AT5G42980.1	| thioredoxin 3 | Chr5:17242772-17243718 FORWARD LENGTH=118 | 201606	13272	5.06	155.92	3	2	0.84	28.8
ATCG00750.1	| ribosomal protein S11 | ChrC:78960-79376 REVERSE LENGTH=138 | 201606	15128	12.25	139.75	3	2	1.25	26.8
AT2G32220.1	| Ribosomal L27e protein family | Chr2:13678945-13679352 FORWARD LENGTH=135 | 201606	15632	10.19	53.36	3	1	0.3	15.6
AT1G01090.1	| pyruvate dehydrogenase E1 alpha | Chr1:47705-49166 REVERSE LENGTH=428 | 201606	47600	7.16	117.7	2	2	0.3	7.2
AT1G02090.1	| Proteasome component (PCI) domain protein | Chr1:387479-389568 REVERSE LENGTH=260 | 201606	29678	5.5	88.91	2	2	0.32	8.1
AT1G02150.1	| Tetratricopeptide repeat (TPR)-like superfamily protein | Chr1:408779-410433 FORWARD LENGTH=524 | 201606	60244	8.24	135.43	2	2	0.23	7.4
AT1G02280.1	| translocon at the outer envelope membrane of chloroplasts 33 | Chr1:448665-450246 REVERSE LENGTH=297 | 201606	33018	9.11	113.45	2	2	0.46	11.4
AT1G03475.1	| Coproporphyrinogen III oxidase | Chr1:869302-871175 REVERSE LENGTH=386 | 201606	44111	6.24	132.9	2	2	0.21	11.7
AT1G03860.1	| prohibitin 2 | Chr1:979611-981157 REVERSE LENGTH=286 | 201606	31791	9.39	124.85	2	2	0.3	11.5
AT1G04160.1	| myosin XI B | Chr1:1086495-1096146 FORWARD LENGTH=1500 | 201606	171040	7.91	94.31	2	2	0.08	4.2
AT1G04850.1	| ubiquitin-associated (UBA)/TS-N domain-containing protein | Chr1:1365311-1368706 REVERSE LENGTH=413 | 201606	46973	5.91	125.32	2	2	0.19	4.8
AT1G04920.1	| sucrose phosphate synthase 3F | Chr1:1391674-1395756 REVERSE LENGTH=1062 | 201606	120142	5.91	75.56	2	2	0.07	2.5
AT1G05010.1	| ethylene-forming enzyme | Chr1:1431419-1432695 REVERSE LENGTH=323 | 201606	36939	5.24	68.67	2	2	0.25	7.7
AT1G05520.1	| Sec23/Sec24 protein transport family protein | Chr1:1631126-1635703 REVERSE LENGTH=783 | 201606	87443	5.41	76.69	2	2	0.15	4.6
AT1G06550.1	| ATP-dependent caseinolytic (Clp) protease/crotonase family protein | Chr1:2003834-2006564 REVERSE LENGTH=387 | 201606	43515	5.4	72.85	2	2	0.33	7.8
AT1G09310.1	| plant/protein (Protein of unknown function%2C DUF538) | Chr1:3009109-3009648 FORWARD LENGTH=179 | 201606	20049	5.37	86.23	2	2	0.51	14
AT1G09780.1	| Phosphoglycerate mutase%2C 2%2C3-bisphosphoglycerate-independent | Chr1:3165550-3167812 REVERSE LENGTH=557 | 201606	60770	5.32	111.16	2	2	0.23	9.2
AT1G10200.1	| GATA type zinc finger transcription factor family protein | Chr1:3346677-3347763 REVERSE LENGTH=190 | 201606	21711	9.1	73.41	2	2	0.46	13.2
AT1G11650.1	| RNA-binding (RRM/RBD/RNP motifs) family protein | Chr1:3914895-3917301 FORWARD LENGTH=306 | 201606	33580	5.69	92.69	2	2	0.28	7.2
AT1G12000.1	| Phosphofructokinase family protein | Chr1:4050159-4053727 REVERSE LENGTH=566 | 201606	61991	5.8	148.16	2	2	0.14	5.3
AT1G12230.1	| Aldolase superfamily protein | Chr1:4148050-4150708 FORWARD LENGTH=405 | 201606	44195	6.41	116.78	2	2	0.21	7.4
AT1G12350.1	| 4-phospho-panto-thenoylcysteine synthetase | Chr1:4198870-4200633 FORWARD LENGTH=317 | 201606	35802	7.55	81.94	2	2	0.26	8.5
AT1G15930.1	| Ribosomal protein L7Ae/L30e/S12e/Gadd45 family protein | Chr1:5471702-5472741 FORWARD LENGTH=144 | 201606	15709	5.38	58.99	2	2	1.18	25
AT1G17580.1	| myosin 1 | Chr1:6039453-6049309 FORWARD LENGTH=1520 | 201606	174281	8.57	76.19	2	2	0.07	2.2
AT1G17880.1	| basic transcription factor 3 | Chr1:6152572-6153425 REVERSE LENGTH=165 | 201606	17935	6.62	110.49	2	2	0.98	22.4
AT1G18660.1	| zinc finger (C3HC4-type RING finger) family protein | Chr1:6421433-6425565 FORWARD LENGTH=486 | 201606	56170	5.73	80.93	2	2	0.16	5.8
AT1G20020.1	| ferredoxin-NADP[+]-oxidoreductase 2 | Chr1:6942851-6944868 FORWARD LENGTH=369 | 201606	41484	8.51	113.82	2	2	0.22	9.5
AT1G20110.1	| RING/FYVE/PHD zinc finger superfamily protein | Chr1:6971554-6974578 FORWARD LENGTH=601 | 201606	66153	6.33	121.85	2	2	0.21	6.2
AT1G21720.1	| proteasome beta subunit C1 | Chr1:7626394-7628070 FORWARD LENGTH=204 | 201606	23069	5.31	79.41	2	2	0.71	11.8
AT1G22430.1	| GroES-like zinc-binding dehydrogenase family protein | Chr1:7919235-7921594 FORWARD LENGTH=388 | 201606	43243	6.1	85.99	2	2	0.21	6.7
AT1G22440.1	| Zinc-binding alcohol dehydrogenase family protein | Chr1:7922560-7924759 FORWARD LENGTH=386 | 201606	43040	5.74	103.47	2	2	0.21	5.7
AT1G23190.1	| Phosphoglucomutase/phosphomannomutase family protein | Chr1:8219946-8224186 FORWARD LENGTH=583 | 201606	63359	5.92	74.44	2	2	0.14	5
AT1G23290.1	| Ribosomal protein L18e/L15 superfamily protein | Chr1:8263007-8263447 FORWARD LENGTH=146 | 201606	16339	10.5	107.69	2	2	0.65	17.1
AT1G23900.3	| gamma-adaptin 1 | Chr1:8441772-8447152 FORWARD LENGTH=864 | 201606	95845	5.41	92.12	2	2	0.09	5.1
AT1G26230.1	| TCP-1/cpn60 chaperonin family protein | Chr1:9072388-9075272 REVERSE LENGTH=611 | 201606	67097	9.23	72.22	2	2	0.13	5.6
AT1G26230.5	| TCP-1/cpn60 chaperonin family protein | Chr1:9073110-9075272 REVERSE LENGTH=470 | 201606	51254	9.02	72.22	2	2	0.18	7.9
AT1G30470.1	| SIT4 phosphatase-associated family protein | Chr1:10779423-10786415 FORWARD LENGTH=811 | 201606	90402	4.43	61.85	2	2	0.15	3.3
AT1G30530.1	| UDP-glucosyl transferase 78D1 | Chr1:10814917-10816374 FORWARD LENGTH=453 | 201606	50348	5.44	86.61	2	2	0.39	14.8
AT1G30580.1	| GTP binding protein | Chr1:10831953-10835454 REVERSE LENGTH=394 | 201606	44728	6.35	123.5	2	2	0.2	6.3
AT1G31910.1	| GHMP kinase family protein | Chr1:11459050-11461649 FORWARD LENGTH=505 | 201606	54774	5.55	60.55	2	2	0.26	6.7
AT1G32990.1	| plastid ribosomal protein l11 | Chr1:11955827-11957139 FORWARD LENGTH=222 | 201606	23305	9.69	128.01	2	2	0.42	10.8
AT1G34570.1	| Essential protein Yae1%2C N-terminal | Chr1:12655297-12656444 REVERSE LENGTH=208 | 201606	23132	4.71	79.98	2	2	0.43	12
AT1G35720.1	| annexin 1 | Chr1:13225304-13226939 FORWARD LENGTH=317 | 201606	36296	5.21	80.5	2	2	0.26	6.6
AT1G43710.1	| Pyridoxal phosphate (PLP)-dependent transferases superfamily protein | Chr1:16486534-16488298 REVERSE LENGTH=482 | 201606	54726	5.8	101.57	2	2	0.16	8.9
AT1G49600.1	| RNA-binding protein 47A | Chr1:18357236-18360150 REVERSE LENGTH=445 | 201606	48681	5.65	68.53	2	2	0.29	6.3
AT1G50250.1	| FTSH protease 1 | Chr1:18614398-18616930 REVERSE LENGTH=716 | 201606	76883	5.64	92.32	2	2	0.24	7.7
AT1G52730.3	| Transducin/WD40 repeat-like superfamily protein | Chr1:19642866-19644518 FORWARD LENGTH=265 | 201606	29464	5.58	110.26	2	2	0.32	9.1
AT1G53240.1	| Lactate/malate dehydrogenase family protein | Chr1:19854966-19856802 REVERSE LENGTH=341 | 201606	36010	8.54	141.29	2	2	0.26	6.7
AT1G53280.1	| Class I glutamine amidotransferase-like superfamily protein | Chr1:19864942-19867341 REVERSE LENGTH=438 | 201606	47474	7.98	68.19	2	2	0.09	3.4
AT1G53850.1	| 20S proteasome alpha subunit E1 | Chr1:20104131-20105792 REVERSE LENGTH=237 | 201606	26102	4.7	106.64	2	2	0.37	12.2
AT1G54080.1	| oligouridylate-binding protein 1A | Chr1:20183923-20186824 REVERSE LENGTH=426 | 201606	47546	6.67	69.29	2	2	0.19	6.1
AT1G56330.1	| secretion-associated RAS 1B | Chr1:21086845-21088478 REVERSE LENGTH=193 | 201606	22029	6.52	138.3	2	2	0.45	12.4
AT1G56450.1	| 20S proteasome beta subunit G1 | Chr1:21141970-21144186 FORWARD LENGTH=246 | 201606	27691	6.09	160.55	2	2	0.35	19.1
AT1G60070.1	| Adaptor protein complex AP-1%2C gamma subunit | Chr1:22142944-22149296 REVERSE LENGTH=862 | 201606	95408	5.97	103.63	2	2	0.14	4.9
AT1G62380.1	| ACC oxidase 2 | Chr1:23082340-23084068 FORWARD LENGTH=320 | 201606	36388	4.98	81.75	2	2	0.26	8.1
AT1G62640.1	| 3-ketoacyl-acyl carrier protein synthase III | Chr1:23192502-23194737 FORWARD LENGTH=404 | 201606	43504	7.05	90.24	2	2	0.33	10.9
AT1G62780.1	| dimethylallyl%2C adenosine tRNA methylthiotransferase | Chr1:23249349-23251066 REVERSE LENGTH=237 | 201606	27259	5.78	94.71	2	2	0.35	14.3
AT1G65260.1	| plastid transcriptionally active 4 | Chr1:24236329-24240428 FORWARD LENGTH=330 | 201606	36541	9.18	132.55	2	2	0.41	8.8
AT1G65860.1	| flavin-monooxygenase glucosinolate S-oxygenase 1 | Chr1:24499210-24502678 REVERSE LENGTH=459 | 201606	52732	6.06	74.7	2	2	0.27	10
AT1G70290.1	| trehalose-6-phosphatase synthase S8 | Chr1:26471286-26474078 REVERSE LENGTH=856 | 201606	98582	5.6	58.37	2	2	0.09	4.7
AT1G70730.1	| Phosphoglucomutase/phosphomannomutase family protein | Chr1:26669020-26672726 REVERSE LENGTH=585 | 201606	63670	5.56	112.67	2	2	0.14	6.8
AT1G70890.1	| MLP-like protein 43 | Chr1:26725912-26726489 REVERSE LENGTH=158 | 201606	17992	5.54	77.28	2	2	1.49	24.1
AT1G71270.1	| Vps52 / Sac2 family | Chr1:26863736-26869817 FORWARD LENGTH=707 | 201606	81286	5.24	93.4	2	2	0.23	7.6
AT1G71840.1	| transducin family protein / WD-40 repeat family protein | Chr1:27022424-27024380 FORWARD LENGTH=407 | 201606	44448	4.33	75.4	2	2	0.21	6.1
AT1G72150.1	| PATELLIN 1 | Chr1:27148558-27150652 FORWARD LENGTH=573 | 201606	64121	4.82	80.94	2	2	0.14	6.1
AT1G72960.1	| Root hair defective 3 GTP-binding protein (RHD3) | Chr1:27446263-27450862 FORWARD LENGTH=795 | 201606	89390	5.41	80.92	2	2	0.1	3.4
AT1G74960.1	| fatty acid biosynthesis 1 | Chr1:28152564-28155948 REVERSE LENGTH=541 | 201606	58418	8.1	97.32	2	2	0.33	8.9
AT1G74970.1	| ribosomal protein S9 | Chr1:28157761-28159202 REVERSE LENGTH=208 | 201606	22620	10.46	139.43	2	2	1.07	23.1
AT1G76010.1	| Alba DNA/RNA-binding protein | Chr1:28528505-28530488 REVERSE LENGTH=350 | 201606	37417	9.78	86.58	2	2	0.39	8.6
AT1G76810.1	| eukaryotic translation initiation factor 2 (eIF-2) family protein | Chr1:28831366-28836310 REVERSE LENGTH=1294 | 201606	142656	5.29	113.99	2	2	0.09	2.6
AT1G78370.1	| glutathione S-transferase TAU 20 | Chr1:29484428-29485204 REVERSE LENGTH=217 | 201606	25105	5.63	139.69	2	2	0.39	12.4
AT1G79470.1	| Aldolase-type TIM barrel family protein | Chr1:29894772-29896661 REVERSE LENGTH=503 | 201606	54558	6.34	114.55	2	2	0.26	7.6
AT1G80660.1	| H[+]-ATPase 9 | Chr1:30316227-30319948 REVERSE LENGTH=954 | 201606	105598	5.99	116.82	2	2	0.08	5
AT1G80660.2	| H[+]-ATPase 9 | Chr1:30316227-30319337 REVERSE LENGTH=825 | 201606	91320	6.78	116.82	2	2	0.15	5.3
AT2G02560.1	| cullin-associated and neddylation dissociated | Chr2:690345-697342 FORWARD LENGTH=1219 | 201606	136636	5.77	124.93	2	2	0.16	6.6
AT2G03760.1	| sulfotransferase 12 | Chr2:1149475-1150455 REVERSE LENGTH=326 | 201606	37515	5.36	97.85	2	2	0.25	5.2
AT2G04520.1	| Nucleic acid-binding%2C OB-fold-like protein | Chr2:1574802-1575239 REVERSE LENGTH=145 | 201606	16798	4.83	84.23	2	2	1.08	26.2
AT2G13360.1	| alanine:glyoxylate aminotransferase | Chr2:5539417-5540902 REVERSE LENGTH=401 | 201606	44465	7.69	197.71	2	2	0.32	13.5
AT2G14750.1	| APS kinase | Chr2:6314128-6315501 FORWARD LENGTH=276 | 201606	30281	8.31	63.61	2	2	0.31	8
AT2G17380.1	| associated protein 19 | Chr2:7553122-7554887 FORWARD LENGTH=161 | 201606	18975	6.9	104.67	2	2	0.54	10.6
AT2G18450.1	| succinate dehydrogenase 1-2 | Chr2:7997510-8000801 REVERSE LENGTH=632 | 201606	70003	5.85	164.51	2	2	0.13	4.4
AT2G18990.1	| thioredoxin-like/ATP-binding protein | Chr2:8238851-8239932 REVERSE LENGTH=211 | 201606	24550	6.35	77.94	2	2	0.96	16.1
AT2G20190.1	| CLIP-associated protein | Chr2:8711862-8718813 REVERSE LENGTH=1439 | 201606	160107	6.72	120.05	2	2	0.05	2
AT2G20760.1	| Clathrin light chain protein | Chr2:8943279-8945108 REVERSE LENGTH=338 | 201606	37202	5.89	97.83	2	2	0.56	10.4
AT2G20830.2	| folic acid binding / transferase | Chr2:8968370-8970479 REVERSE LENGTH=431 | 201606	47916	5.42	126.39	2	2	0.19	8.1
AT2G21580.1	| Ribosomal protein S25 family protein | Chr2:9236629-9237510 FORWARD LENGTH=108 | 201606	12062	10.7	99.78	2	2	1.74	27.8
AT2G23350.1	| poly(A) binding protein 4 | Chr2:9943209-9946041 FORWARD LENGTH=662 | 201606	72006	6.41	97.24	2	2	0.12	5
AT2G24050.1	| MIF4G domain-containing protein / MA3 domain-containing protein | Chr2:10225500-10228456 REVERSE LENGTH=747 | 201606	83408	7.57	124.44	2	2	0.16	4.6
AT2G28815.1	| 50S ribosomal protein L16 | Chr2:12367001-12368064 REVERSE LENGTH=291 | 201606	33136	10.94	126.99	2	2	0.13	7.6
AT2G31390.1	| pfkB-like carbohydrate kinase family protein | Chr2:13383635-13386116 REVERSE LENGTH=325 | 201606	35424	5.31	103.41	2	2	0.26	8.6
AT2G31670.1	| Stress responsive alpha-beta barrel domain protein | Chr2:13472699-13473490 REVERSE LENGTH=263 | 201606	28961	6.45	69.76	2	2	0.53	16.3
AT2G31900.1	| myosin-like protein XIF | Chr2:13560760-13569623 REVERSE LENGTH=1556 | 201606	178227	8.36	76.19	2	2	0.07	2.9
AT2G32060.1	| Ribosomal protein L7Ae/L30e/S12e/Gadd45 family protein | Chr2:13639228-13640104 REVERSE LENGTH=144 | 201606	15661	5.62	90.39	2	2	0.69	14.6
AT2G33040.1	| gamma subunit of Mt ATP synthase | Chr2:14018978-14021047 REVERSE LENGTH=325 | 201606	35597	9.01	157.51	2	2	0.59	20.3
AT2G37040.1	| PHE ammonia lyase 1 | Chr2:15557602-15560237 REVERSE LENGTH=725 | 201606	79189	5.9	109.88	2	2	0.17	8.1
AT2G39310.1	| jacalin-related lectin 22 | Chr2:16414262-16416323 REVERSE LENGTH=458 | 201606	50602	5.15	110.89	2	2	0.39	10
AT2G39330.1	| jacalin-related lectin 23 | Chr2:16419787-16421573 REVERSE LENGTH=459 | 201606	50583	6.78	110.89	2	2	0.18	8.3
AT2G41475.1	| Embryo-specific protein 3%2C (ATS3) | Chr2:17295259-17296329 REVERSE LENGTH=179 | 201606	20335	9.06	85.75	2	2	0.5	12.3
AT2G42500.1	| protein phosphatase 2A-3 | Chr2:17698099-17701226 REVERSE LENGTH=313 | 201606	36437	4.98	217.69	2	2	0.26	13.4
AT2G43090.1	| Aconitase/3-isopropylmalate dehydratase protein | Chr2:17918957-17919712 FORWARD LENGTH=251 | 201606	27059	6.33	95.33	2	2	0.36	12.4
AT2G44070.1	| NagB/RpiA/CoA transferase-like superfamily protein | Chr2:18231097-18232469 REVERSE LENGTH=333 | 201606	37574	8.83	116.53	2	2	0.25	6.6
AT2G45470.1	| FASCICLIN-like arabinogalactan protein 8 | Chr2:18742797-18744059 REVERSE LENGTH=420 | 201606	43162	5.43	122.9	2	2	0.21	10.7
AT3G01340.1	| Transducin/WD40 repeat-like superfamily protein | Chr3:127557-128465 REVERSE LENGTH=302 | 201606	32895	5.64	143.69	2	2	0.46	13.2
AT3G02020.1	| aspartate kinase 3 | Chr3:340739-343410 REVERSE LENGTH=559 | 201606	61918	8.12	155.61	2	2	0.22	5.7
AT3G03250.1	| UDP-GLUCOSE PYROPHOSPHORYLASE 1 | Chr3:749761-754014 REVERSE LENGTH=469 | 201606	51877	5.8	106.3	2	2	0.17	4.5
AT3G06860.1	| multifunctional protein 2 | Chr3:2161926-2166009 FORWARD LENGTH=725 | 201606	79303	9.24	75.45	2	2	0.11	4.7
AT3G07480.1	| 2Fe-2S ferredoxin-like superfamily protein | Chr3:2389026-2389505 FORWARD LENGTH=159 | 201606	17762	7.74	92.37	2	2	0.59	17
AT3G08910.1	| DNAJ heat shock family protein | Chr3:2710402-2711811 REVERSE LENGTH=323 | 201606	35831	9.25	107.61	2	2	0.41	15.8
AT3G08940.2	| light harvesting complex photosystem II | Chr3:2717717-2718665 FORWARD LENGTH=287 | 201606	31231	5.85	147.47	2	2	0.3	8.4
AT3G09350.1	| Fes1A | Chr3:2871216-2873109 FORWARD LENGTH=363 | 201606	40428	5	92.94	2	2	0.51	11.8
AT3G10350.1	| P-loop containing nucleoside triphosphate hydrolases superfamily protein | Chr3:3208310-3210678 FORWARD LENGTH=411 | 201606	44953	7.63	88.23	2	2	0.2	9
AT3G11910.1	| ubiquitin-specific protease 13 | Chr3:3761758-3770290 REVERSE LENGTH=1115 | 201606	131137	5.38	75.18	2	2	0.07	2.9
AT3G12080.1	| GTP-binding family protein | Chr3:3847851-3851980 FORWARD LENGTH=663 | 201606	73366	6.15	67.43	2	2	0.12	3.3
AT3G12800.1	| short-chain dehydrogenase-reductase B | Chr3:4063463-4064757 REVERSE LENGTH=298 | 201606	31891	9.19	74.45	2	2	0.3	6.7
AT3G13290.1	| varicose-like protein | Chr3:4297529-4303113 FORWARD LENGTH=1340 | 201606	146592	5.75	120.1	2	2	0.12	5.4
AT3G13460.1	| evolutionarily conserved C-terminal region 2 | Chr3:4385274-4388220 REVERSE LENGTH=667 | 201606	72716	5.68	104.25	2	2	0.12	4.3
AT3G14210.1	| GDSL-like lipase/acylhydrolase superfamily protein | Chr3:4729886-4731562 FORWARD LENGTH=392 | 201606	44374	7.59	122.41	2	2	0.45	11.2
AT3G16390.1	| nitrile specifier protein 3 | Chr3:5562602-5564356 FORWARD LENGTH=467 | 201606	51428	5.03	74.64	2	2	0.18	7.1
AT3G16410.1	| nitrile specifier protein 4 | Chr3:5572145-5574359 FORWARD LENGTH=619 | 201606	67847	4.99	74.64	2	2	0.13	3.4
AT3G16640.1	| translationally controlled tumor protein | Chr3:5669709-5670729 REVERSE LENGTH=168 | 201606	18956	4.52	147.85	2	2	0.54	20.8
AT3G17970.2	| translocon at the outer membrane of chloroplasts 64-III | Chr3:6148030-6151531 FORWARD LENGTH=560 | 201606	61197	8.4	75.1	2	2	0.15	5.5
AT3G18060.1	| transducin family protein / WD-40 repeat family protein | Chr3:6183880-6186788 FORWARD LENGTH=609 | 201606	66798	5.61	105.04	2	2	0.13	4.6
AT3G19130.1	| RNA-binding protein 47B | Chr3:6611398-6613823 REVERSE LENGTH=435 | 201606	48260	6.08	68.53	2	2	0.29	6.4
AT3G19980.1	| flower-specific%2C phytochrome-associated protein phosphatase 3 | Chr3:6962008-6964761 FORWARD LENGTH=303 | 201606	35393	4.93	64.16	2	2	0.26	8.6
AT3G20800.1	| Cell differentiation%2C Rcd1-like protein | Chr3:7271412-7273897 REVERSE LENGTH=316 | 201606	35145	6.99	165.93	2	2	0.27	9.5
AT3G21280.1	| ubiquitin carboxyl-terminal hydrolase | Chr3:7478166-7482037 REVERSE LENGTH=532 | 201606	60193	5.97	76.72	2	2	0.23	5.8
AT3G22200.1	| Pyridoxal phosphate (PLP)-dependent transferases superfamily protein | Chr3:7835286-7838863 FORWARD LENGTH=504 | 201606	55552	8.01	118.32	2	2	0.16	6.7
AT3G22850.1	| aluminum induced protein with YGL and LRDR motifs | Chr3:8089067-8090275 FORWARD LENGTH=248 | 201606	27489	5.84	63.65	2	2	0.35	7.3
AT3G23600.1	| alpha/beta-Hydrolases superfamily protein | Chr3:8473833-8475655 FORWARD LENGTH=239 | 201606	26130	5.17	76.95	2	2	0.37	15.5
AT3G25580.1	| Thioredoxin superfamily protein | Chr3:9292557-9294148 FORWARD LENGTH=210 | 201606	24542	6.35	77.94	2	2	0.96	16.2
AT3G26030.1	| serine/threonine protein phosphatase 2A 55 kDa regulatory subunit B prime delta | Chr3:9517741-9519260 FORWARD LENGTH=477 | 201606	55719	6.27	76.14	2	2	0.16	4
AT3G26460.1	| Polyketide cyclase/dehydrase and lipid transport superfamily protein | Chr3:9684053-9684607 REVERSE LENGTH=152 | 201606	17876	5.02	136.17	2	2	0.58	15.8
AT3G28710.1	| ATPase%2C V0/A0 complex%2C subunit C/D | Chr3:10773144-10775594 REVERSE LENGTH=351 | 201606	41335	5.04	70.9	2	2	0.22	8
AT3G28900.1	| Ribosomal protein L34e superfamily protein | Chr3:10902864-10904415 REVERSE LENGTH=120 | 201606	13699	11.37	71.72	2	2	0.82	16.7
AT3G29360.1	| UDP-glucose 6-dehydrogenase family protein | Chr3:11267375-11268817 REVERSE LENGTH=480 | 201606	53709	5.69	116.79	2	2	0.26	9.6
AT3G43600.1	| aldehyde oxidase 2 | Chr3:15512778-15517375 REVERSE LENGTH=1321 | 201606	146313	5.49	81.97	2	2	0.12	3.9
AT3G44340.1	| hypothetical protein | Chr3:16011923-16019873 REVERSE LENGTH=1096 | 201606	118927	6.91	62.76	2	2	0.15	6.1
AT3G45190.1	| SIT4 phosphatase-associated family protein | Chr3:16541994-16548161 REVERSE LENGTH=789 | 201606	88098	4.44	110.49	2	2	0.21	6.6
AT3G46000.1	| actin depolymerizing factor 2 | Chr3:16907743-16908822 REVERSE LENGTH=137 | 201606	15963	5.24	160.19	2	2	0.67	25.5
AT3G46060.1	| RAB GTPase homolog 8A | Chr3:16917908-16919740 FORWARD LENGTH=216 | 201606	23991	7.66	129.27	2	2	0.41	12.5
AT3G46440.1	| UDP-XYL synthase 5 | Chr3:17089268-17091611 REVERSE LENGTH=341 | 201606	38593	7.1	103.89	2	2	0.24	13.5
AT3G48560.1	| chlorsulfuron/imidazolinone resistant 1 | Chr3:18001530-18003542 REVERSE LENGTH=670 | 201606	72881	6.2	65.83	2	2	0.12	4
AT3G48690.1	| alpha/beta-Hydrolases superfamily protein | Chr3:18037186-18038160 REVERSE LENGTH=324 | 201606	35773	5.23	112.97	2	2	0.42	11.7
AT3G49680.1	| branched-chain aminotransferase 3 | Chr3:18422768-18425473 FORWARD LENGTH=413 | 201606	45343	8.33	100.2	2	2	0.2	6.1
AT3G50820.1	| photosystem II subunit O-2 | Chr3:18891008-18892311 REVERSE LENGTH=331 | 201606	35226	5.92	79.99	2	2	0.27	6.6
AT3G51800.1	| metallopeptidase M24 family protein | Chr3:19211261-19213568 REVERSE LENGTH=392 | 201606	43294	6.36	93.63	2	2	0.47	14.8
AT3G52180.1	| dual specificity protein phosphatase (DsPTP1) family protein | Chr3:19349884-19353459 REVERSE LENGTH=379 | 201606	43112	6.12	112.06	2	2	0.21	9
AT3G53020.1	| Ribosomal protein L24e family protein | Chr3:19660749-19661912 REVERSE LENGTH=163 | 201606	18734	10.78	113.85	2	2	0.55	20.2
AT3G53460.1	| chloroplast RNA-binding protein 29 | Chr3:19819738-19821423 REVERSE LENGTH=342 | 201606	36099	5.24	120.91	2	2	0.26	6.7
AT3G53610.1	| RAB GTPase homolog 8 | Chr3:19876531-19878264 REVERSE LENGTH=216 | 201606	24095	8.35	88.31	2	2	0.41	18.1
AT3G53740.1	| Ribosomal protein L36e family protein | Chr3:19913921-19914813 REVERSE LENGTH=103 | 201606	11673	11.78	123.42	2	2	1.84	25.2
AT3G55000.1	| tonneau family protein | Chr3:20381612-20383577 FORWARD LENGTH=260 | 201606	29431	5.37	94.05	2	2	0.52	14.2
AT3G56240.1	| copper chaperone | Chr3:20863460-20864402 REVERSE LENGTH=121 | 201606	13077	4.91	114.83	2	2	0.86	26.4
AT3G59990.1	| methionine aminopeptidase 2B | Chr3:22155921-22158551 REVERSE LENGTH=439 | 201606	49542	5.51	100.9	2	2	0.29	5.7
AT3G60245.1	| Zinc-binding ribosomal protein family protein | Chr3:22268803-22269750 FORWARD LENGTH=92 | 201606	10462	10.24	151.7	2	2	2.19	35.9
AT3G61820.1	| Eukaryotic aspartyl protease family protein | Chr3:22880074-22881525 REVERSE LENGTH=483 | 201606	52113	8.76	59.42	2	2	0.17	8.5
AT3G62010.1	| metal ion-binding protein | Chr3:22964945-22971149 FORWARD LENGTH=1254 | 201606	142260	6.6	71.3	2	2	0.09	2.5
AT4G00660.1	| RNAhelicase-like 8 | Chr4:274638-277438 FORWARD LENGTH=505 | 201606	58221	8.39	102.5	2	2	0.15	8.5
AT4G02520.1	| glutathione S-transferase PHI 2 | Chr4:1110673-1111531 REVERSE LENGTH=212 | 201606	24114	5.92	100.95	2	2	0.67	23.1
AT4G02570.1	| cullin 1 | Chr4:1129315-1133435 FORWARD LENGTH=738 | 201606	86988	6.71	81.67	2	2	0.15	4.5
AT4G03080.1	| BRI1 suppressor 1 (BSU1)-like 1 | Chr4:1359935-1365166 REVERSE LENGTH=881 | 201606	96599	5.92	77.48	2	2	0.19	3.9
AT4G04040.1	| Phosphofructokinase family protein | Chr4:1939250-1942765 FORWARD LENGTH=569 | 201606	63158	5.44	76.33	2	2	0.14	4.4
AT4G05420.1	| damaged DNA binding protein 1A | Chr4:2746288-2752663 FORWARD LENGTH=1088 | 201606	122427	5.14	63.58	2	2	0.11	2.6
AT4G10840.1	| Tetratricopeptide repeat (TPR)-like superfamily protein | Chr4:6656614-6659033 FORWARD LENGTH=609 | 201606	66866	5.34	96.8	2	2	0.13	3.9
AT4G11010.1	| nucleoside diphosphate kinase 3 | Chr4:6732780-6734298 REVERSE LENGTH=238 | 201606	25832	9.28	106.74	2	2	0.38	8.8
AT4G11820.1	| hydroxymethylglutaryl-CoA synthase / HMG-CoA synthase / 3-hydroxy-3-methylglutaryl coenzyme A synthase | Chr4:7109124-7111213 REVERSE LENGTH=406 | 201606	45576	6.76	95.46	2	2	0.2	6.4
AT4G12800.1	| photosystem I subunit l | Chr4:7521469-7522493 FORWARD LENGTH=219 | 201606	23094	9.85	95.39	2	2	0.43	13.7
AT4G13180.1	| NAD(P)-binding Rossmann-fold superfamily protein | Chr4:7657373-7658164 REVERSE LENGTH=263 | 201606	27924	6.33	72.88	2	2	0.34	7.2
AT4G13350.1	| NSP (nuclear shuttle protein)-interacting GTPase | Chr4:7770170-7773321 REVERSE LENGTH=602 | 201606	65272	6.88	134.51	2	2	0.14	3.7
AT4G15560.1	| Deoxyxylulose-5-phosphate synthase | Chr4:8884218-8887254 FORWARD LENGTH=717 | 201606	77468	7.04	118.37	2	2	0.11	2.9
AT4G17520.1	| Hyaluronan / mRNA binding family | Chr4:9771496-9773313 FORWARD LENGTH=360 | 201606	38882	8.71	113.75	2	2	0.38	9.2
AT4G17530.1	| RAB GTPase homolog 1C | Chr4:9773721-9775424 REVERSE LENGTH=202 | 201606	22532	5.27	128.25	2	2	0.44	13.4
AT4G17560.1	| Ribosomal protein L19 family protein | Chr4:9780343-9781752 FORWARD LENGTH=225 | 201606	25560	10.03	107.95	2	2	0.62	15.1
AT4G17770.1	| trehalose phosphatase/synthase 5 | Chr4:9877055-9880084 FORWARD LENGTH=862 | 201606	98305	5.76	59.55	2	2	0.18	8.6
AT4G19490.1	| VPS54 | Chr4:10616017-10622934 FORWARD LENGTH=1034 | 201606	114479	5.84	65.77	2	2	0.08	2.4
AT4G20850.1	| tripeptidyl peptidase ii | Chr4:11160935-11169889 REVERSE LENGTH=1380 | 201606	153356	5.77	78.01	2	2	0.06	2
AT4G23600.1	| Tyrosine transaminase family protein | Chr4:12310657-12312885 FORWARD LENGTH=422 | 201606	47408	5.89	145.05	2	2	0.19	9.5
AT4G25080.1	| magnesium-protoporphyrin IX methyltransferase | Chr4:12877015-12878128 FORWARD LENGTH=312 | 201606	33946	7.68	78.03	2	2	0.44	12.2
AT4G26270.1	| phosphofructokinase 3 | Chr4:13301094-13304030 REVERSE LENGTH=489 | 201606	54088	6.61	91.26	2	2	0.26	8.8
AT4G27690.1	| vacuolar protein sorting 26B | Chr4:13824019-13826235 FORWARD LENGTH=303 | 201606	35353	7.02	80.99	2	2	0.42	18.8
AT4G28480.1	| DNAJ heat shock family protein | Chr4:14073310-14075091 FORWARD LENGTH=348 | 201606	38224	8.92	161.5	2	2	0.54	16.4
AT4G28750.1	| Photosystem I reaction centre subunit IV / PsaE protein | Chr4:14202951-14203888 REVERSE LENGTH=143 | 201606	14958	9.92	139.83	2	2	0.72	26.6
AT4G29810.1	| MAP kinase kinase 2 | Chr4:14593299-14595241 REVERSE LENGTH=363 | 201606	39994	6	95.72	2	2	0.23	5.8
AT4G30300.1	| non-intrinsic ABC protein 15 | Chr4:14831005-14831550 REVERSE LENGTH=181 | 201606	20676	9.28	127.48	2	2	0.49	13.3
AT4G31120.1	| SHK1 binding protein 1 | Chr4:15132185-15136568 REVERSE LENGTH=642 | 201606	72509	5.31	99.6	2	2	0.12	3.9
AT4G32840.1	| phosphofructokinase 6 | Chr4:15845010-15848305 REVERSE LENGTH=462 | 201606	51155	6.61	117.7	2	2	0.18	6.7
AT4G33510.1	| 3-deoxy-d-arabino-heptulosonate 7-phosphate synthase | Chr4:16116496-16118549 FORWARD LENGTH=507 | 201606	56399	8.93	75.13	2	2	0.56	11
AT4G34620.1	| small subunit ribosomal protein 16 | Chr4:16535084-16536092 REVERSE LENGTH=113 | 201606	12748	9.81	116.46	2	2	0.89	26.5
AT4G34740.1	| GLN phosphoribosyl pyrophosphate amidotransferase 2 | Chr4:16574894-16576579 REVERSE LENGTH=561 | 201606	61676	6.3	103.46	2	2	0.14	7.1
AT4G35100.1	| plasma membrane intrinsic protein 3 | Chr4:16708672-16709958 FORWARD LENGTH=280 | 201606	29952	8.98	93.3	2	2	0.32	11.1
AT4G37980.1	| cinnamyl alcohol dehydrogenase 7 | Chr4:17852670-17854302 FORWARD LENGTH=357 | 201606	38677	6.75	94.07	2	2	0.24	9.8
AT4G39280.1	| phenylalanyl-tRNA synthetase%2C putative / phenylalanine-tRNA ligase | Chr4:18281641-18284831 REVERSE LENGTH=485 | 201606	55928	8.4	90.41	2	2	0.25	6.6
AT4G39960.1	| Molecular chaperone Hsp40/DnaJ family protein | Chr4:18534194-18536320 FORWARD LENGTH=447 | 201606	48686	9.22	102.98	2	2	0.29	13.6
AT5G03940.1	| chloroplast signal recognition particle 54 kDa subunit | Chr5:1060265-1063257 REVERSE LENGTH=564 | 201606	61478	9.47	63.77	2	2	0.31	7.6
AT5G04590.1	| sulfite reductase | Chr5:1319404-1322298 FORWARD LENGTH=642 | 201606	72361	8.51	119.34	2	2	0.19	6.2
AT5G06460.1	| ubiquitin activating enzyme 2 | Chr5:1970239-1974382 FORWARD LENGTH=1077 | 201606	120574	5.13	84.34	2	2	0.07	3.5
AT5G06600.1	| ubiquitin-specific protease 12 | Chr5:2019545-2027834 REVERSE LENGTH=1116 | 201606	131152	5.51	77.41	2	2	0.07	3.2
AT5G08180.1	| Ribosomal protein L7Ae/L30e/S12e/Gadd45 family protein | Chr5:2631843-2633374 REVERSE LENGTH=156 | 201606	17222	9.46	73.45	2	2	1.04	17.9
AT5G08280.1	| hydroxymethylbilane synthase | Chr5:2663763-2665596 REVERSE LENGTH=382 | 201606	41531	8.75	100.4	2	2	0.22	8.4
AT5G08650.1	| Small GTP-binding protein | Chr5:2806533-2813220 REVERSE LENGTH=681 | 201606	75959	6.3	103.56	2	2	0.12	3.8
AT5G11110.1	| sucrose phosphate synthase 2F | Chr5:3536426-3540901 FORWARD LENGTH=1047 | 201606	117634	6.18	78.13	2	2	0.07	3.1
AT5G12370.1	| exocyst complex component sec10 | Chr5:4003002-4008445 REVERSE LENGTH=825 | 201606	90209	5.23	86.3	2	2	0.15	4.8
AT5G13030.1	| selenoprotein O | Chr5:4133216-4136461 FORWARD LENGTH=633 | 201606	71794	6.27	60.7	2	2	0.19	5.2
AT5G13780.1	| Acyl-CoA N-acyltransferases (NAT) superfamily protein | Chr5:4447610-4448603 REVERSE LENGTH=192 | 201606	22043	6.91	140.26	2	2	0.45	12.5
AT5G14200.3	| isopropylmalate dehydrogenase 1 | Chr5:4576220-4577962 FORWARD LENGTH=388 | 201606	42037	5.72	94.42	2	2	0.22	9
AT5G14780.1	| formate dehydrogenase | Chr5:4777043-4779190 FORWARD LENGTH=384 | 201606	42668	7.12	60.19	2	2	0.21	8.6
AT5G15650.1	| reversibly glycosylated polypeptide 2 | Chr5:5092203-5094093 FORWARD LENGTH=360 | 201606	41377	5.76	84.97	2	2	0.22	9.4
AT5G16470.1	| zinc finger (C2H2 type) family protein | Chr5:5379516-5379830 FORWARD LENGTH=104 | 201606	11346	9.84	66.79	2	2	1.05	13.5
AT5G16970.1	| alkenal reductase | Chr5:5576291-5578001 REVERSE LENGTH=345 | 201606	38394	5.81	85.19	2	2	0.38	10.4
AT5G16990.1	| Zinc-binding dehydrogenase family protein | Chr5:5581831-5583849 REVERSE LENGTH=343 | 201606	38249	8.09	96.69	2	2	0.38	10.2
AT5G17380.1	| Thiamine pyrophosphate dependent pyruvate decarboxylase family protein | Chr5:5724920-5726720 REVERSE LENGTH=572 | 201606	61831	5.74	134.63	2	2	0.22	6.1
AT5G18110.1	| Putative cap-binding protein | Chr5:5989105-5990588 REVERSE LENGTH=221 | 201606	25957	6.45	122.63	2	2	0.37	11.8
AT5G18420.1	| CCR4-NOT transcription complex subunit | Chr5:6105638-6109337 REVERSE LENGTH=441 | 201606	50912	5.19	126.18	2	2	0.18	8.6
AT5G18660.1	| NAD(P)-binding Rossmann-fold superfamily protein | Chr5:6220872-6222125 REVERSE LENGTH=417 | 201606	46263	7.48	116.93	2	2	0.31	8.6
AT5G20830.1	| sucrose synthase 1 | Chr5:7050599-7054032 REVERSE LENGTH=808 | 201606	93509	5.84	115.73	2	2	0.14	6.1
AT5G21326.1	| Ca2+regulated serine-threonine protein kinase family protein | Chr5:7218081-7221743 FORWARD LENGTH=439 | 201606	49940	8.48	103.04	2	2	0.28	7.7
AT5G22800.1	| Alanyl-tRNA synthetase%2C class IIc | Chr5:7616221-7619961 REVERSE LENGTH=978 | 201606	108220	5.42	73.57	2	2	0.08	3.4
AT5G26260.1	| TRAF-like family protein | Chr5:9200492-9202153 FORWARD LENGTH=351 | 201606	39802	9.21	130.02	2	2	0.23	7.4
AT5G28850.2	| Calcium-binding EF-hand family protein | Chr5:10877360-10881278 REVERSE LENGTH=536 | 201606	62394	5.03	69.66	2	2	0.14	6
AT5G37475.1	| Translation initiation factor eIF3 subunit | Chr5:14866328-14867749 REVERSE LENGTH=225 | 201606	25153	4.69	108.35	2	2	0.92	22.7
AT5G38520.1	| alpha/beta-Hydrolases superfamily protein | Chr5:15421605-15423234 FORWARD LENGTH=362 | 201606	39773	6.54	80.44	2	2	0.37	8.6
AT5G39320.1	| UDP-glucose 6-dehydrogenase family protein | Chr5:15743254-15744696 FORWARD LENGTH=480 | 201606	53633	5.6	133.64	2	2	0.26	6.5
AT5G40950.1	| ribosomal protein large subunit 27 | Chr5:16410866-16411845 FORWARD LENGTH=198 | 201606	21781	9.96	99.51	2	2	0.46	12.1
AT5G41520.1	| RNA binding Plectin/S10 domain-containing protein | Chr5:16609377-16610583 REVERSE LENGTH=180 | 201606	19721	9.72	100.57	2	2	0.52	15
AT5G41970.1	| Metal-dependent protein hydrolase | Chr5:16791198-16792961 FORWARD LENGTH=373 | 201606	42558	5.88	97.39	2	2	0.22	8
AT5G42950.1	| GYF domain-containing protein | Chr5:17224436-17231044 FORWARD LENGTH=1714 | 201606	187789	6.29	102.68	2	2	0.07	4
AT5G48570.1	| FKBP-type peptidyl-prolyl cis-trans isomerase family protein | Chr5:19690746-19693656 REVERSE LENGTH=578 | 201606	65467	5.16	75.95	2	2	0.21	4.3
AT5G48880.1	| peroxisomal 3-keto-acyl-CoA thiolase 2 | Chr5:19814576-19816775 REVERSE LENGTH=414 | 201606	43601	6.61	134.82	2	2	0.46	14.5
AT5G51110.1	| Transcriptional coactivator/pterin dehydratase | Chr5:20778316-20779380 REVERSE LENGTH=220 | 201606	24167	9.06	161.32	2	2	0.67	22.7
AT5G51970.1	| GroES-like zinc-binding alcohol dehydrogenase family protein | Chr5:21111820-21113284 FORWARD LENGTH=364 | 201606	40028	5.67	85.62	2	2	0.36	10.7
AT5G52520.1	| Class II aaRS and biotin synthetases superfamily protein | Chr5:21311112-21313875 FORWARD LENGTH=543 | 201606	60880	6.56	112.3	2	2	0.23	6.4
AT5G52920.1	| plastidic pyruvate kinase beta subunit 1 | Chr5:21463680-21466612 FORWARD LENGTH=579 | 201606	63766	6.56	138.14	2	2	0.14	6
AT5G53400.1	| HSP20-like chaperones superfamily protein | Chr5:21661588-21663383 FORWARD LENGTH=304 | 201606	34713	5.3	113.55	2	2	0.27	7.6
AT5G54600.1	| Translation protein SH3-like family protein | Chr5:22183046-22184403 FORWARD LENGTH=198 | 201606	22077	9.7	100.53	2	2	0.45	11.1
AT5G57290.1	| 60S acidic ribosomal protein family | Chr5:23207049-23207835 REVERSE LENGTH=120 | 201606	11913	4.45	170.51	2	2	0.98	21.7
AT5G58410.1	| HEAT/U-box domain-containing protein | Chr5:23609663-23617343 FORWARD LENGTH=1873 | 201606	210664	5.32	78.48	2	2	0.04	1
AT5G64460.1	| Phosphoglycerate mutase family protein | Chr5:25773009-25775104 REVERSE LENGTH=282 | 201606	31978	5.9	103.69	2	2	0.3	7.4
AT5G66470.1	| GTP-binding protein Era-like protein | Chr5:26541986-26544302 REVERSE LENGTH=427 | 201606	49128	6.59	56.73	2	2	0.29	8
AT5G67385.2	| Phototropic-responsive NPH3 family protein | Chr5:26885094-26887083 FORWARD LENGTH=559 | 201606	63126	7.91	133.79	2	2	0.14	4.5
ATCG00150.1	| ATPase%2C F0 complex%2C subunit A protein | ChrC:14021-14770 REVERSE LENGTH=249 | 201606	27390	4.97	91.55	2	2	0.35	13.3
ATCG00350.1	| Photosystem I%2C PsaA/PsaB protein | ChrC:39605-41857 REVERSE LENGTH=750 | 201606	83406	6.6	117.03	2	2	0.11	2.7
ATCG00500.1	| acetyl-CoA carboxylase carboxyl transferase subunit beta | ChrC:57075-58541 FORWARD LENGTH=488 | 201606	56258	5.9	88.67	2	2	0.16	8.8
ATCG00650.1	| ribosomal protein S18 | ChrC:67917-68222 FORWARD LENGTH=101 | 201606	12053	12.16	88.55	2	2	0.96	26.7
ATCG00720.1	| photosynthetic electron transfer B | ChrC:74841-76292 FORWARD LENGTH=215 | 201606	24251	8.89	117.18	2	2	0.41	15.3
ATCG00740.1	| RNA polymerase subunit alpha | ChrC:77901-78890 REVERSE LENGTH=329 | 201606	38398	7.2	61.74	2	2	0.24	8.2
ATCG01120.1	| chloroplast ribosomal protein S15 | ChrC:123296-123562 REVERSE LENGTH=88 | 201606	10712	10.81	98.01	2	2	1.12	38.6
ATMG00510.1	| NADH dehydrogenase subunit 7 | ChrM:132071-138153 FORWARD LENGTH=394 | 201606	44948	7.7	101.05	2	2	0.2	5.6
AT1G60780.1	| Clathrin adaptor complexes medium subunit family protein | Chr1:22369289-22371885 REVERSE LENGTH=428 | 201606	49172	6.01	94.99	2	1	0.09	5.8
AT2G25140.1	| casein lytic proteinase B4 | Chr2:10697877-10701998 REVERSE LENGTH=964 | 201606	108937	6.54	74.55	2	1	0.04	1.8
AT3G21180.1	| autoinhibited Ca(2+)-ATPase 9 | Chr3:7425770-7431941 FORWARD LENGTH=1086 | 201606	119377	6.31	37.25	2	1	0.04	0.7
AT3G29320.1	| Glycosyl transferase%2C family 35 | Chr3:11252871-11257587 FORWARD LENGTH=962 | 201606	109087	5.36	53.73	2	1	0.04	1.1
AT3G48960.1	| Ribosomal protein L13e family protein | Chr3:18150444-18151412 REVERSE LENGTH=206 | 201606	23545	10.55	38.68	2	1	0.69	15.5
AT3G61140.1	| COP9 signalosome complex subunit 1 | Chr3:22626335-22628895 FORWARD LENGTH=441 | 201606	51060	6.9	43.92	2	1	0.08	2.3
AT5G27970.1	| ARM repeat superfamily protein | Chr5:10004720-10015429 FORWARD LENGTH=1630 | 201606	181853	5.73	65.86	2	1	0.02	0.7
AT5G46630.1	| Clathrin adaptor complexes medium subunit family protein | Chr5:18920580-18923252 FORWARD LENGTH=438 | 201606	49747	9.27	38.23	2	1	0.09	6.4
AT1G01100.1	| 60S acidic ribosomal protein family | Chr1:50284-50954 REVERSE LENGTH=112 | 201606	11212	4.3	30.26	1	1	0.44	14.3
AT1G01620.1	| plasma membrane intrinsic protein 1C | Chr1:225986-227176 REVERSE LENGTH=286 | 201606	30841	9.02	48.69	1	1	0.31	8
AT1G01780.1	| GATA type zinc finger transcription factor family protein | Chr1:282919-284082 FORWARD LENGTH=205 | 201606	23772	6.77	42.34	1	1	0.19	3.4
AT1G02890.2	| AAA-type ATPase family protein | Chr1:645372-651797 REVERSE LENGTH=1218 | 201606	133720	5.73	47.29	1	1	0.03	2.9
AT1G02980.1	| cullin 2 | Chr1:677869-681212 FORWARD LENGTH=742 | 201606	86538	7.26	32.57	1	1	0.1	4.9
AT1G03680.1	| thioredoxin M-type 1 | Chr1:916990-917865 REVERSE LENGTH=179 | 201606	19880	9.14	31.95	1	1	0.23	8.9
AT1G04270.1	| cytosolic ribosomal protein S15 | Chr1:1141852-1142960 REVERSE LENGTH=152 | 201606	17118	10.34	55.15	1	1	0.61	8.6
AT1G04300.1	| TRAF-like superfamily protein | Chr1:1148818-1153895 REVERSE LENGTH=1074 | 201606	120151	6.02	28.77	1	1	0.04	1.5
AT1G04350.1	| 2-oxoglutarate (2OG) and Fe(II)-dependent oxygenase superfamily protein | Chr1:1165296-1166538 FORWARD LENGTH=360 | 201606	41227	5.61	58.03	1	1	0.22	9.2
AT1G04530.1	| Tetratricopeptide repeat (TPR)-like superfamily protein | Chr1:1234456-1235895 REVERSE LENGTH=310 | 201606	34759	4.3	86.76	1	1	0.13	2.9
AT1G04600.1	| myosin XI A | Chr1:1262123-1272376 FORWARD LENGTH=1730 | 201606	197938	5.44	28.42	1	1	0.04	2.5
AT1G04710.1	| peroxisomal 3-ketoacyl-CoA thiolase 4 | Chr1:1321941-1324556 FORWARD LENGTH=443 | 201606	47152	8.59	63.73	1	1	0.19	5.9
AT1G04750.1	| vesicle-associated membrane protein 721 | Chr1:1331857-1333426 REVERSE LENGTH=219 | 201606	25091	8.96	56.48	1	1	0.18	5.5
AT1G06220.1	| Ribosomal protein S5/Elongation factor G/III/V family protein | Chr1:1900524-1904583 FORWARD LENGTH=987 | 201606	110942	5.05	49.15	1	1	0.04	1.7
AT1G06650.2	| 2-oxoglutarate (2OG) and Fe(II)-dependent oxygenase superfamily protein | Chr1:2035909-2037186 FORWARD LENGTH=369 | 201606	42278	6.2	42.86	1	1	0.1	6
AT1G06680.1	| photosystem II subunit P-1 | Chr1:2047940-2049186 FORWARD LENGTH=263 | 201606	28249	6.9	68.85	1	1	0.16	8
AT1G07110.1	| fructose-2%2C6-bisphosphatase | Chr1:2178363-2183980 REVERSE LENGTH=744 | 201606	82792	5.95	44.04	1	1	0.11	2.7
AT1G07780.6	| phosphoribosylanthranilate isomerase 1 | Chr1:2410657-2411833 REVERSE LENGTH=225 | 201606	25046	8.39	56.56	1	1	0.18	9.3
AT1G08200.1	| UDP-D-apiose/UDP-D-xylose synthase 2 | Chr1:2574259-2576609 REVERSE LENGTH=389 | 201606	44218	5.58	74.02	1	1	0.1	9
AT1G08380.1	| photosystem I subunit O | Chr1:2641004-2641739 REVERSE LENGTH=140 | 201606	15248	9.78	70.18	1	1	0.31	17.1
AT1G08420.1	| BRI1 suppressor 1 (BSU1)-like 2 | Chr1:2649959-2656564 FORWARD LENGTH=1018 | 201606	109368	5.47	51.02	1	1	0.12	2.9
AT1G09090.2	| respiratory burst oxidase-like protein | Chr1:2932743-2936495 FORWARD LENGTH=843 | 201606	96956	9.26	27.2	1	1	0.04	2
AT1G09130.1	| ATP-dependent caseinolytic (Clp) protease/crotonase family protein | Chr1:2940063-2942217 REVERSE LENGTH=330 | 201606	36455	8.64	39.29	1	1	0.26	4.8
AT1G09740.1	| Adenine nucleotide alpha hydrolases-like superfamily protein | Chr1:3154603-3155834 FORWARD LENGTH=171 | 201606	18423	6.04	28.29	1	1	0.25	5.3
AT1G10360.1	| glutathione S-transferase TAU 18 | Chr1:3395738-3396806 REVERSE LENGTH=227 | 201606	26065	6.66	49.4	1	1	0.17	4
AT1G10760.1	| Pyruvate phosphate dikinase%2C PEP/pyruvate binding domain-containing protein | Chr1:3581210-3590043 REVERSE LENGTH=1399 | 201606	157055	5.66	37.16	1	1	0.03	1.2
AT1G10870.1	| ARF-GAP domain 4 | Chr1:3616905-3623612 REVERSE LENGTH=775 | 201606	87950	6.14	56.5	1	1	0.05	1.5
AT1G11430.1	| plastid developmental protein DAG | Chr1:3847273-3848938 FORWARD LENGTH=232 | 201606	26355	8.99	29.93	1	1	0.17	7.3
AT1G11750.1	| CLP protease proteolytic subunit 6 | Chr1:3967609-3969535 FORWARD LENGTH=271 | 201606	29534	9.38	56.38	1	1	0.15	3.3
AT1G11790.1	| arogenate dehydratase 1 | Chr1:3981476-3984962 FORWARD LENGTH=392 | 201606	44148	6.83	27.03	1	1	0.21	5.9
AT1G12310.1	| Calcium-binding EF-hand family protein | Chr1:4187500-4187946 REVERSE LENGTH=148 | 201606	16506	4.77	79.87	1	1	0.28	10.8
AT1G12410.1	| CLP protease proteolytic subunit 2 | Chr1:4223099-4224954 FORWARD LENGTH=279 | 201606	31303	9.19	31.87	1	1	0.14	3.9
AT1G12430.1	| armadillo repeat kinesin 3 | Chr1:4234122-4238552 REVERSE LENGTH=919 | 201606	101224	6.23	40.85	1	1	0.09	2.4
AT1G12780.1	| UDP-D-glucose/UDP-D-galactose 4-epimerase 1 | Chr1:4356124-4358120 REVERSE LENGTH=351 | 201606	39418	6.14	38.28	1	1	0.11	4.3
AT1G13270.1	| methionine aminopeptidase 1B | Chr1:4544999-4547155 FORWARD LENGTH=369 | 201606	41026	7.14	30.89	1	1	0.11	2.4
AT1G14000.1	| VH1-interacting kinase | Chr1:4797606-4800043 FORWARD LENGTH=438 | 201606	49532	7.77	39.7	1	1	0.09	3.4
AT1G14410.1	| ssDNA-binding transcriptional regulator | Chr1:4929352-4930810 REVERSE LENGTH=263 | 201606	29097	9.38	30.48	1	1	0.15	5.7
AT1G14940.1	| Polyketide cyclase/dehydrase and lipid transport superfamily protein | Chr1:5154775-5155512 REVERSE LENGTH=155 | 201606	18096	6.65	39.88	1	1	0.25	16.1
AT1G15140.1	| FAD/NAD(P)-binding oxidoreductase | Chr1:5210403-5212137 REVERSE LENGTH=295 | 201606	32018	7.79	39.05	1	1	0.47	8.8
AT1G15250.1	| Zinc-binding ribosomal protein family protein | Chr1:5248825-5249381 REVERSE LENGTH=95 | 201606	11095	11.86	30.99	1	1	0.44	7.4
AT1G15290.1	| Tetratricopeptide repeat (TPR)-like superfamily protein | Chr1:5257327-5264814 REVERSE LENGTH=1608 | 201606	178835	6.55	72.31	1	1	0.07	3.4
AT1G17180.1	| glutathione S-transferase TAU 25 | Chr1:5872208-5872958 FORWARD LENGTH=221 | 201606	25745	5.25	27.44	1	1	0.17	3.2
AT1G17220.1	| Translation initiation factor 2%2C small GTP-binding protein | Chr1:5885383-5890165 FORWARD LENGTH=1026 | 201606	110135	7.15	28.06	1	1	0.08	2.9
AT1G17720.1	| Protein phosphatase 2A%2C regulatory subunit PR55 | Chr1:6093949-6098065 REVERSE LENGTH=501 | 201606	56696	5.52	42.77	1	1	0.08	5.4
AT1G17745.1	| D-3-phosphoglycerate dehydrogenase | Chr1:6101157-6104979 FORWARD LENGTH=624 | 201606	66755	5.81	47.38	1	1	0.13	4.6
AT1G18060.1	| microbial collagenase | Chr1:6212065-6213314 REVERSE LENGTH=226 | 201606	25353	9.68	28.4	1	1	0.18	4.4
AT1G19780.1	| cyclic nucleotide gated channel 8 | Chr1:6833885-6836578 REVERSE LENGTH=753 | 201606	86726	9.15	27.2	1	1	0.05	0.9
AT1G20220.1	| Alba DNA/RNA-binding protein | Chr1:7005090-7007285 REVERSE LENGTH=315 | 201606	33800	9.92	35.46	1	1	0.13	2.2
AT1G20440.1	| cold-regulated 47 | Chr1:7084722-7085664 REVERSE LENGTH=265 | 201606	29879	4.75	32.59	1	1	0.15	3
AT1G21440.1	| Phosphoenolpyruvate carboxylase family protein | Chr1:7502325-7504103 REVERSE LENGTH=336 | 201606	36512	6.67	72.15	1	1	0.25	6.5
AT1G22060.1	| sporulation-specific protein | Chr1:7773373-7780586 REVERSE LENGTH=1999 | 201606	230749	5.01	86.85	1	1	0.02	1.5
AT1G22920.1	| COP9 signalosome 5A | Chr1:8109882-8111895 REVERSE LENGTH=357 | 201606	39821	5.11	29.5	1	1	0.23	5.9
AT1G23130.1	| Polyketide cyclase/dehydrase and lipid transport superfamily protein | Chr1:8200434-8200997 FORWARD LENGTH=160 | 201606	17962	5.84	50.84	1	1	0.26	6.9
AT1G23440.1	| Peptidase C15%2C pyroglutamyl peptidase I-like protein | Chr1:8321940-8324019 FORWARD LENGTH=217 | 201606	23945	6.6	35.24	1	1	0.19	4.1
AT1G24050.1	| RNA-processing%2C Lsm domain-containing protein | Chr1:8507057-8508439 FORWARD LENGTH=188 | 201606	20535	5.16	43.15	1	1	0.22	9.6
AT1G25350.1	| glutamine-tRNA ligase%2C putative / glutaminyl-tRNA synthetase%2C putative / GlnRS | Chr1:8889280-8894205 REVERSE LENGTH=795 | 201606	91703	6.11	40.79	1	1	0.05	4.3
AT1G25420.1	| Regulator of Vps4 activity in the MVB pathway protein | Chr1:8916141-8917980 FORWARD LENGTH=323 | 201606	36019	9.1	34.37	1	1	0.26	5.3
AT1G26550.1	| FKBP-like peptidyl-prolyl cis-trans isomerase family protein | Chr1:9171800-9172716 FORWARD LENGTH=142 | 201606	15019	9.56	33	1	1	0.31	8.5
AT1G28010.1	| P-glycoprotein 14 | Chr1:9763436-9767917 FORWARD LENGTH=1247 | 201606	136775	8.96	38.69	1	1	0.03	0.6
AT1G28130.1	| Auxin-responsive GH3 family protein | Chr1:9825431-9827883 FORWARD LENGTH=609 | 201606	69619	5.11	42.7	1	1	0.06	3.6
AT1G29250.1	| Alba DNA/RNA-binding protein | Chr1:10223461-10224592 REVERSE LENGTH=130 | 201606	14564	5.31	29.47	1	1	0.32	13.8
AT1G29350.1	| RNA polymerase II degradation factor-like protein (DUF1296) | Chr1:10268761-10273613 REVERSE LENGTH=831 | 201606	90938	5.51	98.22	1	1	0.1	3.1
AT1G29900.1	| carbamoyl phosphate synthetase B | Chr1:10468164-10471976 FORWARD LENGTH=1187 | 201606	131072	5.53	51.15	1	1	0.07	3.5
AT1G29990.1	| prefoldin 6 | Chr1:10507666-10508821 FORWARD LENGTH=129 | 201606	14847	9.07	71.81	1	1	0.73	18.6
AT1G30070.1	| SGS domain-containing protein | Chr1:10546794-10548072 REVERSE LENGTH=222 | 201606	24975	8.78	31.98	1	1	0.39	9.5
AT1G30120.1	| pyruvate dehydrogenase E1 beta | Chr1:10584350-10586477 REVERSE LENGTH=406 | 201606	44672	5.92	47.09	1	1	0.1	2.5
AT1G30360.1	| Early-responsive to dehydration stress protein (ERD4) | Chr1:10715892-10718799 FORWARD LENGTH=724 | 201606	82282	9.28	27.49	1	1	0.05	1.4
AT1G31070.1	| N-acetylglucosamine-1-phosphate uridylyltransferase 1 | Chr1:11084951-11087740 FORWARD LENGTH=383 | 201606	42873	5.75	62.42	1	1	0.1	6.3
AT1G31780.1	| oligomeric golgi complex subunit | Chr1:11391341-11394610 FORWARD LENGTH=680 | 201606	76714	5.64	38.92	1	1	0.06	1
AT1G32220.1	| NAD(P)-binding Rossmann-fold superfamily protein | Chr1:11608038-11609591 FORWARD LENGTH=296 | 201606	32130	5.56	81	1	1	0.14	4.7
AT1G32470.1	| Single hybrid motif superfamily protein | Chr1:11739479-11740246 REVERSE LENGTH=166 | 201606	18000	5.11	26.23	1	1	0.26	5.4
AT1G35220.1	| FAM91 carboxy-terminus protein | Chr1:12909293-12913916 FORWARD LENGTH=1005 | 201606	112698	5.52	43.81	1	1	0.04	1.1
AT1G35260.1	| MLP-like protein 165 | Chr1:12937059-12937689 REVERSE LENGTH=152 | 201606	17886	6.97	39.22	1	1	0.26	5.3
AT1G35670.1	| calcium-dependent protein kinase 2 | Chr1:13205456-13208058 FORWARD LENGTH=495 | 201606	56393	5.27	40.18	1	1	0.08	2.2
AT1G36180.1	| acetyl-CoA carboxylase 2 | Chr1:13546047-13558339 FORWARD LENGTH=2355 | 201606	264216	6.65	30.77	1	1	0.02	2.4
AT1G41830.1	| SKU5-similar 6 | Chr1:15603892-15607802 REVERSE LENGTH=542 | 201606	60711	9.47	41.23	1	1	0.15	4.6
AT1G45230.1	| DCL protein (DUF3223) | Chr1:17169874-17171381 REVERSE LENGTH=219 | 201606	25774	6.12	30.08	1	1	0.17	5.9
AT1G45545.1	| WEAK CHLOROPLAST MOVEMENT UNDER BLUE LIGHT-like protein (DUF827) | Chr1:17180615-17182957 REVERSE LENGTH=752 | 201606	84516	5.11	26.15	1	1	0.1	2.5
AT1G48350.1	| Ribosomal L18p/L5e family protein | Chr1:17867269-17868215 FORWARD LENGTH=170 | 201606	18886	9.92	38.68	1	1	0.24	11.8
AT1G49760.1	| poly(A) binding protein 8 | Chr1:18416740-18419753 FORWARD LENGTH=671 | 201606	72961	7.13	52.03	1	1	0.06	5.2
AT1G49820.1	| S-methyl-5-thioribose kinase | Chr1:18443005-18444907 FORWARD LENGTH=420 | 201606	48325	5.47	31.99	1	1	0.29	6.2
AT1G49970.1	| CLP protease proteolytic subunit 1 | Chr1:18501936-18504462 REVERSE LENGTH=387 | 201606	42942	8.81	67.95	1	1	0.1	3.6
AT1G50140.1	| P-loop containing nucleoside triphosphate hydrolases superfamily protein | Chr1:18569921-18578663 REVERSE LENGTH=1003 | 201606	113670	6.12	47.29	1	1	0.08	3
AT1G50240.2	| kinase family with ARM repeat domain-containing protein | Chr1:18607063-18614094 FORWARD LENGTH=1322 | 201606	147203	7.19	33.59	1	1	0.03	2.4
AT1G50360.1	| P-loop containing nucleoside triphosphate hydrolases superfamily protein | Chr1:18650688-18657106 FORWARD LENGTH=1153 | 201606	130783	8.57	38.99	1	1	0.07	4.1
AT1G51660.1	| mitogen-activated protein kinase kinase 4 | Chr1:19154575-19155675 FORWARD LENGTH=366 | 201606	40491	9.46	30.95	1	1	0.36	7.7
AT1G51690.1	| protein phosphatase 2A 55 kDa regulatory subunit B alpha isoform | Chr1:19166218-19169974 FORWARD LENGTH=513 | 201606	57526	5.47	75.27	1	1	0.07	2.7
AT1G52230.1	| photosystem I subunit H2 | Chr1:19454902-19455508 FORWARD LENGTH=145 | 201606	15264	9.9	28.39	1	1	0.31	7.6
AT1G52290.1	| Protein kinase superfamily protein | Chr1:19470251-19472362 REVERSE LENGTH=509 | 201606	55966	5.89	51.09	1	1	0.08	3.7
AT1G52760.1	| lysophospholipase 2 | Chr1:19651378-19652576 FORWARD LENGTH=332 | 201606	37179	6.12	45.83	1	1	0.12	4.2
AT1G53510.1	| mitogen-activated protein kinase 18 | Chr1:19970961-19974158 REVERSE LENGTH=615 | 201606	69651	9.24	33.3	1	1	0.06	2.3
AT1G53880.1	| translation initiation factor eIF-2B subunit alpha | Chr1:20115961-20118269 FORWARD LENGTH=385 | 201606	43012	5.1	39.6	1	1	0.1	3.4
AT1G54100.1	| aldehyde dehydrogenase 7B4 | Chr1:20195435-20198853 REVERSE LENGTH=508 | 201606	54801	5.45	44.1	1	1	0.16	3.9
AT1G54510.1	| NIMA-related serine/threonine kinase 1 | Chr1:20358603-20362006 REVERSE LENGTH=612 | 201606	69591	9.5	33.76	1	1	0.06	1.1
AT1G55480.1	| protein containing PDZ domain%2C a K-box domain%2C and a TPR region | Chr1:20713822-20715351 FORWARD LENGTH=335 | 201606	37558	8.19	28.29	1	1	0.25	9
AT1G55670.1	| photosystem I subunit G | Chr1:20802874-20803356 REVERSE LENGTH=160 | 201606	17075	9.57	57.87	1	1	0.27	5
AT1G55860.1	| LOW protein: E3 ubiquitin ligase-like protein | Chr1:20879900-20892910 REVERSE LENGTH=3681 | 201606	407598	4.96	37.58	1	1	0.01	0.3
AT1G56050.1	| GTP-binding protein-like protein | Chr1:20963793-20966181 FORWARD LENGTH=421 | 201606	45999	5.73	71.03	1	1	0.2	7.4
AT1G58190.2	| receptor like protein 9 | Chr1:21540720-21547996 FORWARD LENGTH=1029 | 201606	117053	5.51	36.57	1	1	0.07	1.5
AT1G58848.1	| Disease resistance protein (CC-NBS-LRR class) family | Chr1:21792140-21795455 FORWARD LENGTH=1049 | 201606	122051	6.85	43.6	1	1	0.03	1.8
AT1G59900.1	| pyruvate dehydrogenase complex E1 alpha subunit | Chr1:22051368-22053660 FORWARD LENGTH=389 | 201606	43488	7.16	32.52	1	1	0.1	5.1
AT1G60740.1	| Thioredoxin superfamily protein | Chr1:22361127-22361817 FORWARD LENGTH=162 | 201606	17575	5.33	50.56	1	1	0.26	19.1
AT1G62560.1	| flavin-monooxygenase glucosinolate S-oxygenase 3 | Chr1:23159912-23162551 FORWARD LENGTH=462 | 201606	52827	5.64	45.88	1	1	0.17	4.3
AT1G63020.5	| nuclear RNA polymerase D1A | Chr1:23355329-23359611 REVERSE LENGTH=1145 | 201606	128697	6.5	45.12	1	1	0.03	0.6
AT1G63970.1	| isoprenoid F | Chr1:23738923-23740336 REVERSE LENGTH=231 | 201606	24967	8.94	78.79	1	1	0.18	5.2
AT1G64400.1	| AMP-dependent synthetase and ligase family protein | Chr1:23915802-23919681 REVERSE LENGTH=665 | 201606	75388	7.54	96.9	1	1	0.12	5
AT1G64550.1	| general control non-repressible 3 | Chr1:23968850-23973369 FORWARD LENGTH=715 | 201606	79993	5.7	77.01	1	1	0.05	3.5
AT1G64710.1	| GroES-like zinc-binding alcohol dehydrogenase family protein | Chr1:24044686-24046313 FORWARD LENGTH=380 | 201606	41916	5.7	27.54	1	1	0.1	2.4
AT1G65010.1	| WEB family protein (DUF827) | Chr1:24149543-24154024 FORWARD LENGTH=1345 | 201606	153122	4.92	28.39	1	1	0.03	2.1
AT1G65960.1	| glutamate decarboxylase 2 | Chr1:24555868-24557253 FORWARD LENGTH=365 | 201606	41954	6.07	27.22	1	1	0.35	11.2
AT1G66070.1	| Translation initiation factor eIF3 subunit | Chr1:24596194-24597520 REVERSE LENGTH=226 | 201606	25491	4.78	40.26	1	1	0.38	12.8
AT1G66410.1	| calmodulin 4 | Chr1:24774431-24775785 REVERSE LENGTH=149 | 201606	16908	4.14	96.04	1	1	0.27	10.7
AT1G66430.1	| pfkB-like carbohydrate kinase family protein | Chr1:24778400-24780393 FORWARD LENGTH=384 | 201606	41730	5.54	40.97	1	1	0.35	9.6
AT1G67760.1	| TCP-1/cpn60 chaperonin family protein | Chr1:25405814-25406272 REVERSE LENGTH=120 | 201606	13391	10.08	90.55	1	1	0.35	20.8
AT1G70520.1	| cysteine-rich RLK (RECEPTOR-like protein kinase) 2 | Chr1:26584888-26587334 REVERSE LENGTH=649 | 201606	72981	8.75	51.09	1	1	0.06	3.7
AT1G70530.1	| cysteine-rich RLK (RECEPTOR-like protein kinase) 3 | Chr1:26588750-26591379 REVERSE LENGTH=646 | 201606	72421	8.71	51.09	1	1	0.06	2.5
AT1G70830.3	| MLP-like protein 28 | Chr1:26710203-26711395 REVERSE LENGTH=201 | 201606	22716	4.88	83.7	1	1	0.44	11.9
AT1G71410.1	| ARM repeat superfamily protein | Chr1:26913070-26917515 REVERSE LENGTH=909 | 201606	99159	7	39.47	1	1	0.09	2.6
AT1G72160.1	| Sec14p-like phosphatidylinositol transfer family protein | Chr1:27153823-27155609 REVERSE LENGTH=490 | 201606	56298	5.21	30.01	1	1	0.08	1.6
AT1G72340.1	| NagB/RpiA/CoA transferase-like superfamily protein | Chr1:27236898-27238482 FORWARD LENGTH=382 | 201606	42393	5.25	29.59	1	1	0.1	7.9
AT1G72750.1	| translocase inner membrane subunit 23-2 | Chr1:27383577-27384143 FORWARD LENGTH=188 | 201606	19923	9.55	79.82	1	1	0.23	8
AT1G72810.1	| Pyridoxal-5~-phosphate-dependent enzyme family protein | Chr1:27398760-27400393 REVERSE LENGTH=516 | 201606	57402	8.23	56.41	1	1	0.08	2.3
AT1G72880.1	| Survival protein SurE-like phosphatase/nucleotidase | Chr1:27423678-27425928 REVERSE LENGTH=385 | 201606	40934	5.3	40.3	1	1	0.11	4.4
AT1G73690.1	| cyclin-dependent kinase D1%3B1 | Chr1:27715113-27717018 FORWARD LENGTH=398 | 201606	45281	9.38	51.09	1	1	0.2	3.8
AT1G73820.1	| Ssu72-like family protein | Chr1:27755740-27757158 REVERSE LENGTH=193 | 201606	22394	5.65	36.52	1	1	0.2	8.3
AT1G74030.1	| enolase 1 | Chr1:27839465-27841901 REVERSE LENGTH=477 | 201606	51841	5.79	35.84	1	1	0.27	6.3
AT1G74730.1	| transmembrane protein%2C putative (DUF1118) | Chr1:28078995-28079831 FORWARD LENGTH=198 | 201606	20722	9.3	50.69	1	1	0.22	6.6
AT1G74850.1	| plastid transcriptionally active 2 | Chr1:28119237-28122314 REVERSE LENGTH=862 | 201606	97120	5.67	28.84	1	1	0.04	0.9
AT1G75420.1	| UDP-Glycosyltransferase superfamily protein | Chr1:28305469-28307317 FORWARD LENGTH=463 | 201606	51896	9.55	26.54	1	1	0.08	3.7
AT1G76080.1	| chloroplastic drought-induced stress protein of 32 kD | Chr1:28548063-28549348 REVERSE LENGTH=302 | 201606	33948	8.65	42.31	1	1	0.13	3
AT1G77680.1	| Ribonuclease II/R family protein | Chr1:29192188-29195963 REVERSE LENGTH=1055 | 201606	118195	6.16	43.06	1	1	0.04	1.2
AT1G77760.1	| nitrate reductase 1 | Chr1:29236005-29239367 REVERSE LENGTH=917 | 201606	103716	6.34	35.03	1	1	0.04	0.9
AT1G78630.1	| Ribosomal protein L13 family protein | Chr1:29575997-29577406 FORWARD LENGTH=241 | 201606	26886	9.93	57.83	1	1	0.17	7.1
AT1G79570.1	| kinase superfamily with octicosapeptide/Phox/Bem1p domain-containing protein | Chr1:29932856-29937540 REVERSE LENGTH=1248 | 201606	137614	5.2	39.7	1	1	0.03	1.3
AT2G01350.1	| quinolinate phoshoribosyltransferase | Chr2:165332-167209 REVERSE LENGTH=348 | 201606	38045	5.9	36.04	1	1	0.11	4.3
AT2G01450.1	| MAP kinase 17 | Chr2:199722-202010 REVERSE LENGTH=486 | 201606	56028	6.45	33.3	1	1	0.08	1.4
AT2G01540.1	| Calcium-dependent lipid-binding (CaLB domain) family protein | Chr2:242297-243233 REVERSE LENGTH=180 | 201606	20357	6.42	53.92	1	1	0.22	8.3
AT2G04620.1	| zinc transporter-like protein | Chr2:1610506-1612902 REVERSE LENGTH=798 | 201606	91107	6.91	28.77	1	1	0.05	1
AT2G04660.1	| anaphase-promoting complex/cyclosome 2 | Chr2:1624933-1629039 FORWARD LENGTH=865 | 201606	98470	4.79	30.41	1	1	0.09	1.7
AT2G05920.1	| Subtilase family protein | Chr2:2269831-2272207 REVERSE LENGTH=754 | 201606	80535	8.58	45.04	1	1	0.11	3.7
AT2G05990.1	| NAD(P)-binding Rossmann-fold superfamily protein | Chr2:2322876-2324867 FORWARD LENGTH=390 | 201606	41416	9.1	55.75	1	1	0.11	3.1
AT2G10450.1	| 14-3-3 family protein | Chr2:4020305-4020773 FORWARD LENGTH=82 | 201606	9635	4.66	28.75	1	1	0.52	12.2
AT2G15430.1	| DNA-directed RNA polymerase family protein | Chr2:6733661-6735482 FORWARD LENGTH=319 | 201606	35724	4.63	29.44	1	1	0.12	5
AT2G16700.1	| actin depolymerizing factor 5 | Chr2:7244717-7245467 FORWARD LENGTH=143 | 201606	16628	6.82	54.62	1	1	0.28	8.4
AT2G17290.1	| Calcium-dependent protein kinase family protein | Chr2:7517005-7519239 FORWARD LENGTH=544 | 201606	61529	5.41	49.65	1	1	0.07	4.8
AT2G17790.1	| vacuolar protein sorting-associated 35A-like protein | Chr2:7733685-7739344 FORWARD LENGTH=787 | 201606	90121	5.13	43.51	1	1	0.05	2.7
AT2G18040.1	| peptidylprolyl cis/trans isomerase%2C NIMA-interacting 1 | Chr2:7842346-7843537 FORWARD LENGTH=119 | 201606	13064	9.13	43.95	1	1	0.86	29.4
AT2G19330.1	| plant intracellular ras group-related LRR 6 | Chr2:8372947-8374453 FORWARD LENGTH=380 | 201606	43126	9.34	28.7	1	1	0.1	1.8
AT2G19740.1	| Ribosomal protein L31e family protein | Chr2:8513577-8514346 FORWARD LENGTH=119 | 201606	13750	9.95	52.01	1	1	0.34	6.7
AT2G19750.1	| Ribosomal protein S30 family protein | Chr2:8515037-8515806 FORWARD LENGTH=62 | 201606	6883	12.24	57.8	1	1	0.78	16.1
AT2G19760.1	| profilin 1 | Chr2:8517074-8518067 REVERSE LENGTH=131 | 201606	14371	4.7	56.61	1	1	0.33	32.8
AT2G20560.1	| DNAJ heat shock family protein | Chr2:8848353-8849815 REVERSE LENGTH=337 | 201606	37143	8.81	71.71	1	1	0.4	12.5
AT2G20930.1	| SNARE-like superfamily protein | Chr2:9000790-9001656 REVERSE LENGTH=140 | 201606	15783	8.54	44.06	1	1	0.68	20.7
AT2G21060.1	| glycine-rich protein 2B | Chr2:9036983-9037588 REVERSE LENGTH=201 | 201606	19408	6.29	45.36	1	1	0.24	6.5
AT2G21270.1	| ubiquitin fusion degradation 1 | Chr2:9108126-9110012 FORWARD LENGTH=319 | 201606	35529	6.27	50.94	1	1	0.26	7.2
AT2G21410.1	| vacuolar proton ATPase A2 | Chr2:9162703-9168141 FORWARD LENGTH=821 | 201606	93616	5.39	87.99	1	1	0.05	1.2
AT2G22230.1	| Thioesterase superfamily protein | Chr2:9450042-9451427 FORWARD LENGTH=220 | 201606	24340	8.61	42.87	1	1	0.18	3.6
AT2G22290.1	| RAB GTPase homolog H1D | Chr2:9466568-9467688 FORWARD LENGTH=207 | 201606	23212	6.38	50.64	1	1	0.43	9.2
AT2G22360.1	| DNAJ heat shock family protein | Chr2:9498162-9500459 FORWARD LENGTH=442 | 201606	48358	9.25	61.7	1	1	0.09	5
AT2G22450.1	| riboflavin biosynthesis protein | Chr2:9530654-9532691 FORWARD LENGTH=476 | 201606	52452	5.8	54.4	1	1	0.08	1.9
AT2G23070.1	| Protein kinase superfamily protein | Chr2:9824162-9826871 REVERSE LENGTH=432 | 201606	50490	9.48	66.32	1	1	0.09	3
AT2G24060.1	| Translation initiation factor 3 protein | Chr2:10229453-10231390 FORWARD LENGTH=312 | 201606	35234	5.77	34.7	1	1	0.12	5.1
AT2G24270.4	| aldehyde dehydrogenase 11A3 | Chr2:10327109-10329601 REVERSE LENGTH=503 | 201606	54499	6.23	63.12	1	1	0.08	3
AT2G25080.1	| glutathione peroxidase 1 | Chr2:10668134-10669828 FORWARD LENGTH=236 | 201606	26170	9.42	26.45	1	1	0.17	5.1
AT2G25800.1	| elongation factor Ts (DUF810) | Chr2:11006138-11009728 REVERSE LENGTH=987 | 201606	110579	8.38	32.22	1	1	0.08	3.9
AT2G26250.1	| 3-ketoacyl-CoA synthase 10 | Chr2:11170799-11173059 REVERSE LENGTH=550 | 201606	62435	9.14	35.25	1	1	0.07	3.1
AT2G26570.1	| WEAK CHLOROPLAST MOVEMENT UNDER BLUE LIGHT-like protein (DUF827) | Chr2:11299565-11302076 FORWARD LENGTH=807 | 201606	89354	5.01	45.06	1	1	0.05	2.7
AT2G27020.1	| 20S proteasome alpha subunit G1 | Chr2:11528515-11530858 REVERSE LENGTH=249 | 201606	27645	5.93	48.67	1	1	0.35	7.6
AT2G27210.1	| BRI1 suppressor 1 (BSU1)-like 3 | Chr2:11630188-11636182 FORWARD LENGTH=1006 | 201606	108254	5.48	51.02	1	1	0.08	1.7
AT2G27680.1	| NAD(P)-linked oxidoreductase superfamily protein | Chr2:11803981-11805965 REVERSE LENGTH=384 | 201606	43355	8.21	48.15	1	1	0.1	3.6
AT2G27880.1	| Argonaute family protein | Chr2:11871488-11876712 FORWARD LENGTH=997 | 201606	111817	9.51	50.16	1	1	0.08	3.6
AT2G28090.1	| Heavy metal transport/detoxification superfamily protein | Chr2:11972398-11974007 REVERSE LENGTH=245 | 201606	28020	9.3	35.11	1	1	0.16	3.3
AT2G29140.1	| pumilio 3 | Chr2:12531392-12535060 FORWARD LENGTH=964 | 201606	106547	5.8	54.51	1	1	0.08	1.9
AT2G29450.1	| glutathione S-transferase tau 5 | Chr2:12624774-12625566 REVERSE LENGTH=224 | 201606	26098	5.44	84.77	1	1	0.37	8.9
AT2G29960.1	| cyclophilin 5 | Chr2:12769183-12770528 REVERSE LENGTH=201 | 201606	21577	9.06	28.64	1	1	0.21	4
AT2G30520.1	| Phototropic-responsive NPH3 family protein | Chr2:13002920-13005573 REVERSE LENGTH=593 | 201606	66554	7.49	48.32	1	1	0.13	5.1
AT2G30870.1	| glutathione S-transferase PHI 10 | Chr2:13141490-13142392 FORWARD LENGTH=215 | 201606	24215	5.49	35.31	1	1	0.41	7.9
AT2G32850.1	| Protein kinase superfamily protein | Chr2:13935448-13937977 REVERSE LENGTH=650 | 201606	72854	7.16	63.62	1	1	0.06	4.6
AT2G32920.1	| PDI-like 2-3 | Chr2:13962502-13965406 REVERSE LENGTH=440 | 201606	48180	5.63	28.49	1	1	0.09	3
AT2G34470.1	| urease accessory protein G | Chr2:14530900-14532411 REVERSE LENGTH=275 | 201606	30235	6.03	34.05	1	1	0.15	4
AT2G35050.1	| kinase superfamily with octicosapeptide/Phox/Bem1p domain-containing protein | Chr2:14769708-14774796 FORWARD LENGTH=1257 | 201606	140074	5.62	39.7	1	1	0.06	2.1
AT2G35370.1	| glycine decarboxylase complex H | Chr2:14891239-14892050 FORWARD LENGTH=165 | 201606	18050	5.24	26.23	1	1	0.57	9.7
AT2G37600.1	| Ribosomal protein L36e family protein | Chr2:15774410-15775203 REVERSE LENGTH=113 | 201606	12728	11.74	55.7	1	1	0.89	23
AT2G37690.1	| phosphoribosylaminoimidazole carboxylase%2C putative / AIR carboxylase | Chr2:15806111-15810240 FORWARD LENGTH=642 | 201606	70335	6.52	34.54	1	1	0.06	1.9
AT2G38020.1	| vacuoleless1 (VCL1) | Chr2:15910098-15914190 REVERSE LENGTH=858 | 201606	97768	5.58	53.86	1	1	0.04	1.2
AT2G38620.1	| cyclin-dependent kinase B1%3B2 | Chr2:16152551-16153406 FORWARD LENGTH=257 | 201606	29755	9.07	38.91	1	1	0.15	11.3
AT2G38670.1	| phosphorylethanolamine cytidylyltransferase 1 | Chr2:16168979-16171680 FORWARD LENGTH=421 | 201606	47347	7.27	30.86	1	1	0.09	2.9
AT2G38700.1	| mevalonate diphosphate decarboxylase 1 | Chr2:16180918-16183785 REVERSE LENGTH=412 | 201606	46013	6.33	45.23	1	1	0.09	2.9
AT2G40730.1	| kinase family with ARM repeat domain-containing protein | Chr2:16990083-16996072 REVERSE LENGTH=798 | 201606	86221	7.68	28.44	1	1	0.16	6.5
AT2G41220.1	| glutamate synthase 2 | Chr2:17177934-17188388 FORWARD LENGTH=1629 | 201606	178951	6.57	52.49	1	1	0.02	1.3
AT2G41510.1	| cytokinin oxidase/dehydrogenase 1 | Chr2:17314626-17316861 FORWARD LENGTH=575 | 201606	65169	9.37	29.21	1	1	0.07	4.3
AT2G41560.1	| autoinhibited Ca(2+)-ATPase%2C isoform 4 | Chr2:17332256-17337179 REVERSE LENGTH=1030 | 201606	113476	5.77	88.69	1	1	0.04	2.9
AT2G42210.1	| Mitochondrial import inner membrane translocase subunit Tim17/Tim22/Tim23 family protein | Chr2:17590642-17591591 FORWARD LENGTH=159 | 201606	16989	7.93	34.4	1	1	0.27	5.7
AT2G42220.1	| Rhodanese/Cell cycle control phosphatase superfamily protein | Chr2:17592105-17593305 FORWARD LENGTH=234 | 201606	25722	8.87	41.19	1	1	0.17	3
AT2G42230.2	| C-CAP/cofactor C-like domain-containing protein | Chr2:17593705-17596563 REVERSE LENGTH=568 | 201606	62908	5.34	34.32	1	1	0.07	1.4
AT2G42580.1	| tetratricopetide-repeat thioredoxin-like 3 | Chr2:17728855-17731461 FORWARD LENGTH=691 | 201606	76383	9.02	29.3	1	1	0.06	1.9
AT2G42810.1	| protein phosphatase 5.2 | Chr2:17812336-17815896 REVERSE LENGTH=484 | 201606	55124	5.88	37.63	1	1	0.16	5.6
AT2G42910.1	| Phosphoribosyltransferase family protein | Chr2:17856396-17858394 FORWARD LENGTH=337 | 201606	37936	6.01	84.28	1	1	0.12	5
AT2G43100.1	| isopropylmalate isomerase 2 | Chr2:17920685-17921455 FORWARD LENGTH=256 | 201606	27426	5.75	77.99	1	1	0.35	9.4
AT2G43800.1	| Actin-binding FH2 (formin homology 2) family protein | Chr2:18145721-18148721 FORWARD LENGTH=894 | 201606	98601	7.75	40.8	1	1	0.09	3.4
AT2G44160.1	| methylenetetrahydrofolate reductase 2 | Chr2:18262301-18265185 FORWARD LENGTH=594 | 201606	67387	5.33	82.78	1	1	0.2	6.7
AT2G44640.1	| TRIGALACTOSYLDIACYLGLYCEROL-like protein | Chr2:18417286-18419063 FORWARD LENGTH=451 | 201606	49914	8.81	27.9	1	1	0.09	2.4
AT2G45330.1	| RNA 2~-phosphotransferase%2C Tpt1 / KptA family | Chr2:18686340-18687874 FORWARD LENGTH=289 | 201606	32452	9.61	32.66	1	1	0.14	7.6
AT2G45540.2	| WD-40 repeat family protein / beige-like protein | Chr2:18757881-18772229 REVERSE LENGTH=3001 | 201606	330678	5.6	35.99	1	1	0.03	1.1
AT2G45710.1	| Zinc-binding ribosomal protein family protein | Chr2:18831243-18831999 FORWARD LENGTH=84 | 201606	9741	9.21	75.32	1	1	1.28	35.7
AT2G45790.1	| phosphomannomutase | Chr2:18855876-18857753 FORWARD LENGTH=246 | 201606	27972	5.33	26.22	1	1	0.16	4.5
AT2G46910.1	| Plastid-lipid associated protein PAP / fibrillin family protein | Chr2:19272427-19273856 FORWARD LENGTH=284 | 201606	31789	8.35	57.68	1	1	0.14	6.7
AT2G47250.1	| RNA helicase family protein | Chr2:19399923-19402981 REVERSE LENGTH=729 | 201606	83228	6.94	63.58	1	1	0.05	1.6
AT2G47450.1	| chloroplast signal recognition particle component (CAO) | Chr2:19472781-19473902 FORWARD LENGTH=373 | 201606	41538	4.52	27.82	1	1	0.11	7.5
AT2G47570.1	| 60S ribosomal protein L18 | Chr2:19515898-19516922 REVERSE LENGTH=186 | 201606	20907	10.52	52.82	1	1	0.22	8.1
AT2G47710.1	| Adenine nucleotide alpha hydrolases-like superfamily protein | Chr2:19555045-19555956 REVERSE LENGTH=162 | 201606	17518	7.74	48.68	1	1	0.26	7.4
AT3G01180.1	| starch synthase 2 | Chr3:62456-65678 REVERSE LENGTH=792 | 201606	88108	6.47	65.25	1	1	0.05	2.3
AT3G01310.1	| Phosphoglycerate mutase-like family protein | Chr3:94343-101603 REVERSE LENGTH=1056 | 201606	120478	5.64	27.16	1	1	0.11	3.9
AT3G02090.1	| Insulinase (Peptidase family M16) protein | Chr3:365624-368526 FORWARD LENGTH=531 | 201606	59180	6.3	79.13	1	1	0.07	4
AT3G03710.1	| polyribonucleotide nucleotidyltransferase | Chr3:919542-924906 FORWARD LENGTH=922 | 201606	100188	5.4	57.92	1	1	0.04	3.3
AT3G03920.1	| H/ACA ribonucleoprotein complex%2C subunit Gar1/Naf1 protein | Chr3:1009123-1010379 REVERSE LENGTH=202 | 201606	21027	11.42	51.43	1	1	0.22	12.4
AT3G04550.1	| rubisco accumulation factor-like protein | Chr3:1225961-1227310 FORWARD LENGTH=449 | 201606	50282	5.78	31.98	1	1	0.18	5.1
AT3G04600.1	| Nucleotidylyl transferase superfamily protein | Chr3:1243152-1245958 FORWARD LENGTH=402 | 201606	46010	5.67	40.31	1	1	0.09	7.5
AT3G04710.1	| ankyrin repeat family protein | Chr3:1278229-1280942 FORWARD LENGTH=456 | 201606	49628	5.15	26.81	1	1	0.18	7.2
AT3G04770.1	| 40s ribosomal protein SA B | Chr3:1309465-1310846 REVERSE LENGTH=332 | 201606	37618	9.67	48.34	1	1	0.12	4.8
AT3G04880.1	| DNA-damage-repair/toleration protein (DRT102) | Chr3:1346431-1347363 REVERSE LENGTH=310 | 201606	33669	5.14	37.66	1	1	0.13	3.9
AT3G04910.1	| with no lysine (K) kinase 1 | Chr3:1355084-1358057 FORWARD LENGTH=700 | 201606	81183	5.02	69.33	1	1	0.11	2.9
AT3G06050.1	| peroxiredoxin IIF | Chr3:1826311-1827809 REVERSE LENGTH=201 | 201606	21546	8.99	32.24	1	1	0.47	13.4
AT3G06730.1	| Thioredoxin z | Chr3:2124276-2125845 FORWARD LENGTH=183 | 201606	20828	5.65	71.46	1	1	0.22	7.7
AT3G07740.1	| ADA2 2A | Chr3:2470014-2473062 REVERSE LENGTH=548 | 201606	62687	7.85	34.8	1	1	0.07	1.5
AT3G07810.1	| RNA-binding (RRM/RBD/RNP motifs) family protein | Chr3:2492875-2495052 FORWARD LENGTH=494 | 201606	51840	8.42	54.47	1	1	0.08	3
AT3G08850.1	| Regulatory-associated protein of TOR 1 | Chr3:2686978-2694911 REVERSE LENGTH=1344 | 201606	149523	6.2	36.04	1	1	0.06	1.9
AT3G09810.1	| isocitrate dehydrogenase VI | Chr3:3008753-3011070 FORWARD LENGTH=374 | 201606	40949	6.71	41.81	1	1	0.11	4.3
AT3G10700.1	| galacturonic acid kinase | Chr3:3346789-3350863 REVERSE LENGTH=424 | 201606	46270	5.54	34.42	1	1	0.2	4.5
AT3G11170.1	| fatty acid desaturase 7 | Chr3:3499959-3502126 FORWARD LENGTH=446 | 201606	51427	8.15	64.02	1	1	0.08	3.1
AT3G12290.1	| Amino acid dehydrogenase family protein | Chr3:3919591-3921326 FORWARD LENGTH=299 | 201606	31798	8.27	34.26	1	1	0.3	7.4
AT3G15190.1	| chloroplast 30S ribosomal protein S20 | Chr3:5116216-5117412 FORWARD LENGTH=202 | 201606	22098	10.14	58.75	1	1	0.2	5.4
AT3G16490.1	| IQ-domain 26 | Chr3:5603962-5605489 REVERSE LENGTH=389 | 201606	43975	10.08	28.7	1	1	0.1	1.8
AT3G16560.1	| Protein phosphatase 2C family protein | Chr3:5636051-5637702 REVERSE LENGTH=493 | 201606	54150	5	34.36	1	1	0.17	3.7
AT3G16760.1	| Tetratricopeptide repeat (TPR)-like superfamily protein | Chr3:5703213-5705080 FORWARD LENGTH=475 | 201606	48913	9.24	27.34	1	1	0.09	1.5
AT3G17020.1	| Adenine nucleotide alpha hydrolases-like superfamily protein | Chr3:5802728-5804063 REVERSE LENGTH=163 | 201606	17935	6.41	64.43	1	1	0.58	17.8
AT3G17240.1	| lipoamide dehydrogenase 2 | Chr3:5890278-5892166 REVERSE LENGTH=507 | 201606	54237	6.55	63.68	1	1	0.36	5.9
AT3G17880.1	| tetraticopeptide domain-containing thioredoxin | Chr3:6123534-6126113 FORWARD LENGTH=380 | 201606	42991	5.5	86.56	1	1	0.1	6.6
AT3G18090.1	| nuclear RNA polymerase D2B | Chr3:6195323-6200204 FORWARD LENGTH=1055 | 201606	120716	8.95	26.5	1	1	0.04	1.6
AT3G19170.1	| presequence protease 1 | Chr3:6625578-6631874 REVERSE LENGTH=1080 | 201606	121680	5.48	28.48	1	1	0.07	4
AT3G19700.1	| Leucine-rich repeat protein kinase family protein | Chr3:6843662-6846791 FORWARD LENGTH=991 | 201606	111203	7.8	30	1	1	0.04	1.6
AT3G19710.1	| branched-chain aminotransferase4 | Chr3:6847202-6849429 REVERSE LENGTH=354 | 201606	39393	5.9	61.21	1	1	0.23	7.9
AT3G19950.1	| RING/U-box superfamily protein | Chr3:6942853-6943839 FORWARD LENGTH=328 | 201606	36253	4.35	33.28	1	1	0.12	3
AT3G19960.1	| myosin 1 | Chr3:6949787-6956736 FORWARD LENGTH=1166 | 201606	131903	8.58	38.99	1	1	0.1	2.9
AT3G20000.1	| translocase of the outer mitochondrial membrane 40 | Chr3:6967685-6970247 FORWARD LENGTH=309 | 201606	34228	6.32	33.66	1	1	0.27	10.7
AT3G20370.1	| TRAF-like family protein | Chr3:7105481-7107079 FORWARD LENGTH=379 | 201606	43536	6.17	26.2	1	1	0.1	1.8
AT3G20390.1	| endoribonuclease L-PSP family protein | Chr3:7110227-7111695 REVERSE LENGTH=187 | 201606	19917	8.53	42.18	1	1	0.23	10.2
AT3G20630.1	| ubiquitin-specific protease 14 | Chr3:7203001-7208340 REVERSE LENGTH=797 | 201606	88945	5.06	59.16	1	1	0.05	1.8
AT3G20820.1	| Leucine-rich repeat (LRR) family protein | Chr3:7280930-7282027 FORWARD LENGTH=365 | 201606	40464	8.77	43.24	1	1	0.11	5.5
AT3G21110.1	| purin 7 | Chr3:7402696-7405273 REVERSE LENGTH=411 | 201606	46434	6.06	38.59	1	1	0.09	4.6
AT3G21200.1	| proton gradient regulation 7 | Chr3:7436091-7437845 FORWARD LENGTH=317 | 201606	35783	5.65	33.54	1	1	0.26	7.3
AT3G21220.1	| MAP kinase kinase 5 | Chr3:7445917-7446963 FORWARD LENGTH=348 | 201606	38704	8.97	26.22	1	1	0.38	7.5
AT3G21650.1	| Protein phosphatase 2A regulatory B subunit family protein | Chr3:7621680-7623412 REVERSE LENGTH=546 | 201606	62148	8.69	29.31	1	1	0.07	3.5
AT3G22110.1	| 20S proteasome alpha subunit C1 | Chr3:7792819-7793571 REVERSE LENGTH=250 | 201606	27572	6.6	83.77	1	1	0.57	13.6
AT3G22480.1	| prefoldin 2 | Chr3:7969080-7969526 FORWARD LENGTH=148 | 201606	16573	8.59	28.68	1	1	0.28	6.8
AT3G23700.1	| Nucleic acid-binding proteins superfamily | Chr3:8531689-8533742 REVERSE LENGTH=392 | 201606	42952	5.39	62.36	1	1	0.1	3.6
AT3G24170.1	| glutathione-disulfide reductase | Chr3:8729762-8734115 REVERSE LENGTH=499 | 201606	54293	6.36	77.64	1	1	0.08	2
AT3G24210.1	| Ankyrin repeat family protein | Chr3:8753712-8755627 REVERSE LENGTH=607 | 201606	68241	8.5	47.26	1	1	0.06	1.3
AT3G24430.1	| ATP binding protein | Chr3:8868731-8872154 REVERSE LENGTH=532 | 201606	58184	5.91	74.33	1	1	0.07	4.3
AT3G24630.1	| hypothetical protein | Chr3:8988398-8990737 FORWARD LENGTH=724 | 201606	81595	9.16	32.53	1	1	0.05	2.5
AT3G25530.1	| glyoxylate reductase 1 | Chr3:9271949-9273514 REVERSE LENGTH=289 | 201606	30957	5.88	48.39	1	1	0.31	6.6
AT3G26020.1	| Protein phosphatase 2A regulatory B subunit family protein | Chr3:9514363-9516585 FORWARD LENGTH=510 | 201606	59178	8.94	29.31	1	1	0.15	2.7
AT3G27120.1	| P-loop containing nucleoside triphosphate hydrolases superfamily protein | Chr3:10000248-10004281 REVERSE LENGTH=680 | 201606	75871	6.26	47.29	1	1	0.06	1.8
AT3G27530.1	| golgin Putative 6 | Chr3:10193778-10199659 REVERSE LENGTH=914 | 201606	102568	4.86	89.72	1	1	0.13	4.7
AT3G27740.1	| carbamoyl phosphate synthetase A | Chr3:10281470-10283792 REVERSE LENGTH=430 | 201606	47428	5.68	35.75	1	1	0.19	4.4
AT3G27925.1	| DegP protease 1 | Chr3:10366659-10368864 REVERSE LENGTH=439 | 201606	46816	6	33.69	1	1	0.09	3.2
AT3G44320.1	| nitrilase 3 | Chr3:15993419-15995493 FORWARD LENGTH=346 | 201606	38340	5.62	108.38	1	1	0.24	7.8
AT3G45570.1	| RING/U-box protein with C6HC-type zinc finger domain-containing protein | Chr3:16725094-16726116 REVERSE LENGTH=312 | 201606	36309	4.93	29.12	1	1	0.12	2.6
AT3G46616.1	| hypothetical protein | Chr3:17173444-17173752 REVERSE LENGTH=50 | 201606	5780	9.84	33.17	1	1	0.98	18
AT3G46970.1	| alpha-glucan phosphorylase 2 | Chr3:17301625-17306111 REVERSE LENGTH=841 | 201606	95499	5.79	29.51	1	1	0.04	5.4
AT3G47340.1	| glutamine-dependent asparagine synthase 1 | Chr3:17438136-17441043 REVERSE LENGTH=584 | 201606	66035	6.17	37.02	1	1	0.07	3.6
AT3G47820.1	| PLANT U-BOX 39 | Chr3:17644368-17645963 FORWARD LENGTH=531 | 201606	58001	7.24	39.7	1	1	0.07	3.4
AT3G48000.1	| aldehyde dehydrogenase 2B4 | Chr3:17717082-17719843 REVERSE LENGTH=538 | 201606	58951	7.11	53.04	1	1	0.07	3.3
AT3G48090.1	| alpha/beta-Hydrolases superfamily protein | Chr3:17755553-17757692 REVERSE LENGTH=623 | 201606	72044	5.73	70.53	1	1	0.06	2.4
AT3G48420.1	| Haloacid dehalogenase-like hydrolase (HAD) superfamily protein | Chr3:17929743-17931551 FORWARD LENGTH=319 | 201606	34680	8.31	37.63	1	1	0.13	4.4
AT3G48730.1	| glutamate-1-semialdehyde 2%2C1-aminomutase 2 | Chr3:18049697-18051550 FORWARD LENGTH=472 | 201606	50452	7.01	61.1	1	1	0.09	3
AT3G48860.1	| coiled-coil protein | Chr3:18117619-18120865 FORWARD LENGTH=494 | 201606	54170	8.63	33.38	1	1	0.08	3
AT3G50270.1	| HXXXD-type acyl-transferase family protein | Chr3:18635926-18637278 FORWARD LENGTH=450 | 201606	50231	5.85	82.13	1	1	0.09	5.3
AT3G50520.1	| Phosphoglycerate mutase family protein | Chr3:18748058-18749418 FORWARD LENGTH=230 | 201606	26077	6.19	38.54	1	1	0.17	4.3
AT3G50730.1	| Protein kinase superfamily protein | Chr3:18851533-18853137 REVERSE LENGTH=371 | 201606	42628	8.45	51.09	1	1	0.1	4
AT3G50950.1	| HOPZ-ACTIVATED RESISTANCE 1 | Chr3:18936127-18938685 FORWARD LENGTH=852 | 201606	98176	5.88	37.08	1	1	0.09	2.1
AT3G51140.1	| DnaJ (DUF3353) | Chr3:18998182-18999437 FORWARD LENGTH=278 | 201606	31516	10.66	35.31	1	1	0.14	5.4
AT3G51160.1	| NAD(P)-binding Rossmann-fold superfamily protein | Chr3:19007232-19008353 REVERSE LENGTH=373 | 201606	42049	5.75	60.14	1	1	0.1	2.7
AT3G51310.1	| VPS35 homolog C | Chr3:19044634-19049321 REVERSE LENGTH=790 | 201606	90203	5.21	40.6	1	1	0.05	1.8
AT3G51600.1	| lipid transfer protein 5 | Chr3:19138661-19139124 REVERSE LENGTH=118 | 201606	13000	10.43	31.54	1	1	0.37	6.8
AT3G51630.1	| with no lysine (K) kinase 5 | Chr3:19149487-19151924 FORWARD LENGTH=549 | 201606	62961	5.35	69.33	1	1	0.14	3.3
AT3G52960.1	| Thioredoxin superfamily protein | Chr3:19639699-19640403 FORWARD LENGTH=234 | 201606	24783	9.12	36.56	1	1	0.4	15.4
AT3G53180.1	| nodulin/glutamine synthase-like protein | Chr3:19707068-19711188 FORWARD LENGTH=852 | 201606	94840	5.56	54.96	1	1	0.09	2.2
AT3G53580.1	| diaminopimelate epimerase family protein | Chr3:19864784-19866907 FORWARD LENGTH=362 | 201606	39473	5.45	55.16	1	1	0.11	5.2
AT3G53680.1	| Acyl-CoA N-acyltransferase with RING/FYVE/PHD-type zinc finger domain-containing protein | Chr3:19892863-19897412 REVERSE LENGTH=841 | 201606	95213	6.78	26.57	1	1	0.04	1.2
AT3G53760.1	| GAMMA-TUBULIN COMPLEX PROTEIN 4 | Chr3:19918182-19922264 REVERSE LENGTH=745 | 201606	86309	6.43	34.39	1	1	0.05	1.7
AT3G53900.1	| uracil phosphoribosyltransferase | Chr3:19956914-19958699 REVERSE LENGTH=231 | 201606	25259	6.31	31.17	1	1	0.18	4.3
AT3G53960.1	| Major facilitator superfamily protein | Chr3:19978306-19980886 REVERSE LENGTH=602 | 201606	67419	6.84	37.85	1	1	0.06	1.5
AT3G53990.1	| Adenine nucleotide alpha hydrolases-like superfamily protein | Chr3:19989658-19991019 REVERSE LENGTH=160 | 201606	17896	5.66	32.51	1	1	0.58	10
AT3G54360.1	| zinc ion binding protein | Chr3:20128570-20131581 REVERSE LENGTH=405 | 201606	45414	5.14	37.15	1	1	0.2	4.7
AT3G54540.1	| general control non-repressible 4 | Chr3:20190393-20192564 FORWARD LENGTH=723 | 201606	80602	5.94	56.89	1	1	0.11	2.9
AT3G55070.1	| LisH/CRA/RING-U-box domains-containing protein | Chr3:20408377-20410887 FORWARD LENGTH=418 | 201606	48325	8.4	42.34	1	1	0.09	2.2
AT3G55120.1	| Chalcone-flavanone isomerase family protein | Chr3:20430248-20431415 REVERSE LENGTH=246 | 201606	26750	5.43	52.09	1	1	0.17	5.3
AT3G55170.1	| Ribosomal L29 family protein | Chr3:20453136-20454293 REVERSE LENGTH=123 | 201606	14168	10.92	47.39	1	1	0.33	13.8
AT3G55630.1	| DHFS-FPGS homolog D | Chr3:20636785-20639395 FORWARD LENGTH=470 | 201606	53084	7.57	75.27	1	1	0.08	2.8
AT3G55770.1	| GATA type zinc finger transcription factor family protein | Chr3:20703799-20705115 FORWARD LENGTH=199 | 201606	22334	9.17	42.34	1	1	0.45	9
AT3G56070.1	| rotamase cyclophilin 2 | Chr3:20806987-20807517 REVERSE LENGTH=176 | 201606	19136	7.68	36.74	1	1	0.24	7.4
AT3G57150.1	| homologue of NAP57 | Chr3:21154255-21155952 REVERSE LENGTH=565 | 201606	63329	9.19	28.7	1	1	0.07	1.4
AT3G57520.1	| seed imbibition 2 | Chr3:21288982-21292694 REVERSE LENGTH=773 | 201606	86002	5.44	38.28	1	1	0.05	1.7
AT3G57610.1	| adenylosuccinate synthase | Chr3:21334519-21336603 REVERSE LENGTH=490 | 201606	53388	6.68	52.97	1	1	0.08	3.7
AT3G58180.1	| ARM repeat superfamily protein | Chr3:21544189-21545981 FORWARD LENGTH=314 | 201606	34242	4.86	43.47	1	1	0.13	3.5
AT3G59020.1	| ARM repeat superfamily protein | Chr3:21810973-21817418 REVERSE LENGTH=1029 | 201606	118478	4.75	40.21	1	1	0.04	2.3
AT3G59760.1	| O-acetylserine (thiol) lyase isoform C | Chr3:22072119-22075345 REVERSE LENGTH=433 | 201606	46428	8.59	52.19	1	1	0.09	6.2
AT3G60820.1	| N-terminal nucleophile aminohydrolases (Ntn hydrolases) superfamily protein | Chr3:22472038-22473809 REVERSE LENGTH=223 | 201606	24856	6.95	92.39	1	1	0.18	5.8
AT3G62120.1	| Class II aaRS and biotin synthetases superfamily protein | Chr3:23001227-23003849 REVERSE LENGTH=530 | 201606	61344	6.09	41.32	1	1	0.15	3.8
AT3G62940.1	| Cysteine proteinases superfamily protein | Chr3:23263106-23264197 REVERSE LENGTH=316 | 201606	35821	8.21	50.52	1	1	0.12	4.1
AT3G63140.1	| chloroplast stem-loop binding protein of 41 kDa | Chr3:23327006-23328620 REVERSE LENGTH=406 | 201606	44074	8.54	109.06	1	1	0.21	7.6
AT4G01395.1	| conserved oligomeric Golgi complex subunit 4 | Chr4:573098-575648 REVERSE LENGTH=738 | 201606	83553	4.84	36.31	1	1	0.16	5.4
AT4G01800.1	| Albino or Glassy Yellow 1 | Chr4:770926-776131 REVERSE LENGTH=1022 | 201606	115682	6.07	31.62	1	1	0.04	2.2
AT4G01810.1	| Sec23/Sec24 protein transport family protein | Chr4:776734-779802 REVERSE LENGTH=880 | 201606	96742	6.36	60.48	1	1	0.04	1.5
AT4G02340.1	| alpha/beta-Hydrolases superfamily protein | Chr4:1035722-1037403 FORWARD LENGTH=324 | 201606	36805	6.26	39.02	1	1	0.12	3.4
AT4G03190.1	| GRR1-like protein 1 | Chr4:1405108-1407057 REVERSE LENGTH=585 | 201606	66803	8.12	71.86	1	1	0.06	6.5
AT4G08320.1	| Tetratricopeptide repeat (TPR)-like superfamily protein | Chr4:5252853-5254990 FORWARD LENGTH=426 | 201606	47022	4.72	34.59	1	1	0.19	4
AT4G09010.1	| ascorbate peroxidase 4 | Chr4:5777502-5779338 REVERSE LENGTH=349 | 201606	38082	8.59	29.01	1	1	0.24	9.7
AT4G09320.1	| nucleoside diphosphate kinase | Chr4:5923484-5924366 FORWARD LENGTH=149 | 201606	16547	6.3	79.28	1	1	0.64	16.8
AT4G10120.1	| Sucrose-phosphate synthase family protein | Chr4:6315033-6319785 FORWARD LENGTH=1050 | 201606	119716	6.23	31.02	1	1	0.07	2.2
AT4G10120.5	| Sucrose-phosphate synthase family protein | Chr4:6315991-6319785 FORWARD LENGTH=849 | 201606	95878	6.17	31.02	1	1	0.04	3.3
AT4G10480.1	| Nascent polypeptide-associated complex (NAC)%2C alpha subunit family protein | Chr4:6478089-6479079 REVERSE LENGTH=212 | 201606	23157	4.25	30.48	1	1	0.19	6.1
AT4G11400.1	| ARID/BRIGHT DNA-binding %2C ELM2 domain and myb-like DNA-binding domain-containing protein | Chr4:6938717-6940539 FORWARD LENGTH=573 | 201606	66765	7.97	39.88	1	1	0.06	1.4
AT4G11600.1	| glutathione peroxidase 6 | Chr4:7010021-7011330 REVERSE LENGTH=232 | 201606	25739	9.38	36.09	1	1	0.62	10.3
AT4G12720.1	| MutT/nudix family protein | Chr4:7487716-7489557 FORWARD LENGTH=282 | 201606	32092	5.32	46.34	1	1	0.14	6.4
AT4G14210.1	| phytoene desaturase 3 | Chr4:8190426-8194769 REVERSE LENGTH=566 | 201606	63380	6.08	54.53	1	1	0.14	3.4
AT4G15480.1	| UDP-Glycosyltransferase superfamily protein | Chr4:8849000-8850472 REVERSE LENGTH=490 | 201606	55359	5.34	34.6	1	1	0.08	1.8
AT4G16060.1	| hypothetical protein | Chr4:9094424-9096147 FORWARD LENGTH=289 | 201606	33047	6.92	40.92	1	1	0.13	3.5
AT4G16143.1	| importin alpha isoform 2 | Chr4:9134450-9137134 REVERSE LENGTH=535 | 201606	59440	5	43.07	1	1	0.15	6.4
AT4G16265.1	| RNA polymerases M/15 Kd subunit | Chr4:9202529-9203975 REVERSE LENGTH=114 | 201606	13668	6.19	32.56	1	1	0.35	21.9
AT4G16390.1	| pentatricopeptide (PPR) repeat-containing protein | Chr4:9257985-9260093 FORWARD LENGTH=702 | 201606	79276	5.87	81.2	1	1	0.11	5.3
AT4G16860.1	| Disease resistance protein (TIR-NBS-LRR class) family | Chr4:9488584-9495700 REVERSE LENGTH=1147 | 201606	132227	5.6	41.12	1	1	0.03	1.7
AT4G16890.1	| TIR-NBS-LRR class disease resistance protein | Chr4:9500506-9505482 REVERSE LENGTH=1437 | 201606	164946	5.21	41.12	1	1	0.03	1.5
AT4G16920.1	| Disease resistance protein (TIR-NBS-LRR class) family | Chr4:9519173-9525691 REVERSE LENGTH=1304 | 201606	149973	5.41	41.12	1	1	0.03	1.2
AT4G16940.1	| Disease resistance protein (TIR-NBS-LRR class) family | Chr4:9533149-9537510 REVERSE LENGTH=1147 | 201606	132430	5.13	41.12	1	1	0.07	1.7
AT4G17140.1	| pleckstrin homology (PH) domain-containing protein | Chr4:9613617-9636618 REVERSE LENGTH=4216 | 201606	474532	5.81	30.99	1	1	0.01	1
AT4G18040.1	| eukaryotic translation initiation factor 4E | Chr4:10016724-10018151 REVERSE LENGTH=235 | 201606	26674	5	87.27	1	1	0.36	8.1
AT4G18060.1	| SH3 domain-containing protein | Chr4:10027668-10029662 REVERSE LENGTH=351 | 201606	39680	6.4	50.93	1	1	0.23	4.6
AT4G18330.2	| Translation elongation factor EF1A/initiation factor IF2gamma family protein | Chr4:10126747-10128587 FORWARD LENGTH=471 | 201606	52055	8.91	26.58	1	1	0.17	4.9
AT4G19860.1	| alpha/beta-Hydrolases superfamily protein | Chr4:10777655-10780260 REVERSE LENGTH=535 | 201606	60848	5.04	31.26	1	1	0.07	1.7
AT4G20410.1	| gamma-soluble NSF attachment protein | Chr4:11014099-11016454 REVERSE LENGTH=291 | 201606	32739	4.86	59.33	1	1	0.29	8.2
AT4G21280.1	| photosystem II subunit QA | Chr4:11334446-11335587 FORWARD LENGTH=223 | 201606	23781	9.64	54.81	1	1	0.41	12.6
AT4G21710.1	| DNA-directed RNA polymerase family protein | Chr4:11535684-11542200 REVERSE LENGTH=1188 | 201606	136131	7.91	56.66	1	1	0.06	3.2
AT4G21800.1	| P-loop containing nucleoside triphosphate hydrolases superfamily protein | Chr4:11573289-11574976 FORWARD LENGTH=379 | 201606	42638	4.51	57.33	1	1	0.1	2.4
AT4G22890.1	| PGR5-LIKE A | Chr4:12007157-12009175 FORWARD LENGTH=324 | 201606	36040	5.2	66.52	1	1	0.26	7.1
AT4G23290.1	| cysteine-rich RLK (RECEPTOR-like protein kinase) 21 | Chr4:12177910-12180810 REVERSE LENGTH=647 | 201606	72568	8.8	51.09	1	1	0.06	4
AT4G23650.1	| calcium-dependent protein kinase 6 | Chr4:12324967-12327415 REVERSE LENGTH=529 | 201606	59527	5.95	44.55	1	1	0.15	5.1
AT4G23850.1	| AMP-dependent synthetase and ligase family protein | Chr4:12403720-12408263 REVERSE LENGTH=666 | 201606	75201	5.64	96.9	1	1	0.12	5.6
AT4G23895.3	| Pleckstrin homology (PH) domain-containing protein | Chr4:12422883-12426318 FORWARD LENGTH=467 | 201606	52253	5.88	50.37	1	1	0.08	4.3
AT4G24220.1	| NAD(P)-binding Rossmann-fold superfamily protein | Chr4:12565219-12566474 FORWARD LENGTH=388 | 201606	44544	5.09	46.3	1	1	0.1	8.2
AT4G24490.1	| RAB geranylgeranyl transferase alpha subunit 1 | Chr4:12655330-12658103 REVERSE LENGTH=678 | 201606	77374	5.59	47.78	1	1	0.06	2.1
AT4G24510.1	| HXXXD-type acyl-transferase family protein | Chr4:12660929-12662537 FORWARD LENGTH=421 | 201606	47550	5.38	61.06	1	1	0.09	2.4
AT4G24680.2	| modifier of snc1 | Chr4:12733425-12739737 FORWARD LENGTH=1413 | 201606	153853	9.39	37.54	1	1	0.03	1.8
AT4G24750.1	| Rhodanese/Cell cycle control phosphatase superfamily protein | Chr4:12758422-12760749 REVERSE LENGTH=292 | 201606	32208	8.77	36.76	1	1	0.14	6.2
AT4G24840.1	| oligomeric golgi complex subunit-like protein | Chr4:12796525-12800926 REVERSE LENGTH=756 | 201606	85307	5.53	58.9	1	1	0.16	4.5
AT4G25100.1	| Fe superoxide dismutase 1 | Chr4:12884649-12886501 REVERSE LENGTH=212 | 201606	23776	6.06	38.61	1	1	0.19	5.2
AT4G26300.1	| Arginyl-tRNA synthetase%2C class Ic | Chr4:13308400-13313109 REVERSE LENGTH=642 | 201606	72854	6.73	37.11	1	1	0.19	4.5
AT4G26500.1	| chloroplast sulfur E | Chr4:13382456-13383571 REVERSE LENGTH=371 | 201606	40979	5.46	114.72	1	1	0.11	9.7
AT4G26870.1	| Class II aminoacyl-tRNA and biotin synthetases superfamily protein | Chr4:13505381-13507619 FORWARD LENGTH=532 | 201606	60922	6.21	44.96	1	1	0.07	2.6
AT4G26900.1	| HIS HF | Chr4:13515514-13519608 FORWARD LENGTH=592 | 201606	64552	6.31	27.39	1	1	0.07	1.9
AT4G27000.1	| RNA-binding (RRM/RBD/RNP motifs) family protein | Chr4:13554983-13557763 REVERSE LENGTH=415 | 201606	45115	5.62	47.37	1	1	0.1	3.1
AT4G27010.1	| ribosome 60S biogenesis amino-terminal protein | Chr4:13558943-13568296 FORWARD LENGTH=2374 | 201606	269424	5.86	29.26	1	1	0.02	0.3
AT4G27500.1	| proton pump interactor 1 | Chr4:13743614-13745900 FORWARD LENGTH=612 | 201606	68951	9.04	31.76	1	1	0.06	2.3
AT4G27640.1	| ARM repeat superfamily protein | Chr4:13798013-13802976 REVERSE LENGTH=1048 | 201606	116128	4.77	108.58	1	1	0.11	4.4
AT4G28650.1	| Leucine-rich repeat transmembrane protein kinase family protein | Chr4:14144155-14147276 REVERSE LENGTH=1013 | 201606	111264	6.57	51.09	1	1	0.04	1.5
AT4G29010.1	| Enoyl-CoA hydratase/isomerase family | Chr4:14297312-14302016 REVERSE LENGTH=721 | 201606	78208	9.36	93.33	1	1	0.11	6.9
AT4G29510.1	| arginine methyltransferase 11 | Chr4:14491739-14493752 FORWARD LENGTH=390 | 201606	44208	4.83	28.19	1	1	0.1	2.3
AT4G30010.1	| ATP-dependent RNA helicase | Chr4:14672947-14673219 FORWARD LENGTH=90 | 201606	10489	9.33	26.32	1	1	0.47	10
AT4G30310.1	| FGGY family of carbohydrate kinase | Chr4:14831913-14834798 FORWARD LENGTH=499 | 201606	54702	5.53	44.1	1	1	0.08	4.6
AT4G30890.1	| ubiquitin-specific protease 24 | Chr4:15036383-15038825 REVERSE LENGTH=551 | 201606	60574	7.7	34.06	1	1	0.07	3.3
AT4G31570.1	| nucleoporin | Chr4:15297061-15306036 FORWARD LENGTH=2730 | 201606	306981	4.71	28.7	1	1	0.01	0.7
AT4G31790.1	| Tetrapyrrole (Corrin/Porphyrin) Methylase | Chr4:15377479-15378530 FORWARD LENGTH=277 | 201606	31056	4.98	55.07	1	1	0.14	4.7
AT4G31990.1	| aspartate aminotransferase 5 | Chr4:15471074-15473521 REVERSE LENGTH=453 | 201606	49971	8.18	68.42	1	1	0.39	11.3
AT4G32330.1	| TPX2 (targeting protein for Xklp2) protein family | Chr4:15609801-15611867 FORWARD LENGTH=437 | 201606	47685	8.59	46.17	1	1	0.09	3.2
AT4G32760.1	| ENTH/VHS/GAT family protein | Chr4:15799376-15803832 FORWARD LENGTH=675 | 201606	73146	5.02	58.51	1	1	0.06	3.1
AT4G32960.1	| BRISC/BRCA1-A complex protein | Chr4:15908785-15910141 REVERSE LENGTH=264 | 201606	29690	6.66	54.85	1	1	0.15	3
AT4G33200.1	| myosin | Chr4:16002768-16014792 REVERSE LENGTH=1522 | 201606	174965	8.91	28.42	1	1	0.07	1.8
AT4G33760.1	| tRNA synthetase class II (D%2C K and N) family protein | Chr4:16189285-16193260 REVERSE LENGTH=664 | 201606	74869	6.73	28.01	1	1	0.06	3.9
AT4G34050.1	| S-adenosyl-L-methionine-dependent methyltransferases superfamily protein | Chr4:16310844-16311973 FORWARD LENGTH=259 | 201606	29251	5.13	41.8	1	1	0.15	7.7
AT4G34090.1	| cyclin delta-3 | Chr4:16328051-16330110 REVERSE LENGTH=330 | 201606	37114	5.65	56.59	1	1	0.12	8.8
AT4G34290.1	| SWIB/MDM2 domain superfamily protein | Chr4:16410883-16412122 FORWARD LENGTH=144 | 201606	16102	9.79	37.52	1	1	0.66	15.3
AT4G34490.1	| cyclase associated protein 1 | Chr4:16484896-16487355 REVERSE LENGTH=476 | 201606	51451	6.23	57.19	1	1	0.18	7.6
AT4G34570.1	| thymidylate synthase 2 | Chr4:16511129-16514110 REVERSE LENGTH=565 | 201606	63852	8.12	37.15	1	1	0.07	1.2
AT4G34830.1	| Pentatricopeptide repeat (PPR) superfamily protein | Chr4:16599976-16605994 REVERSE LENGTH=1089 | 201606	120950	8.06	40.89	1	1	0.07	1.9
AT4G35260.1	| isocitrate dehydrogenase 1 | Chr4:16774494-16776233 REVERSE LENGTH=367 | 201606	40001	8.36	51.39	1	1	0.11	4.1
AT4G35310.1	| calmodulin-domain protein kinase 5 | Chr4:16802436-16804628 FORWARD LENGTH=556 | 201606	62487	5.15	49.65	1	1	0.07	5.8
AT4G36520.1	| Chaperone DnaJ-domain superfamily protein | Chr4:17230589-17235435 REVERSE LENGTH=1422 | 201606	163500	5.78	26.26	1	1	0.03	0.6
AT4G36800.1	| RUB1 conjugating enzyme 1 | Chr4:17341237-17342148 REVERSE LENGTH=184 | 201606	21002	7.7	33.76	1	1	0.22	3.8
AT4G37870.1	| phosphoenolpyruvate carboxykinase 1 | Chr4:17802974-17806332 REVERSE LENGTH=671 | 201606	73929	6.61	27.09	1	1	0.06	1.5
AT4G38420.1	| SKU5 similar 9 | Chr4:17982840-17985173 FORWARD LENGTH=549 | 201606	62623	9.62	26.81	1	1	0.14	3.5
AT4G38680.1	| glycine rich protein 2 | Chr4:18072240-18072851 REVERSE LENGTH=203 | 201606	19484	5.62	106.36	1	1	0.23	10.8
AT4G38930.1	| Ubiquitin fusion degradation UFD1 family protein | Chr4:18149907-18151616 FORWARD LENGTH=311 | 201606	34788	5.45	50.94	1	1	0.13	2.6
AT4G39400.1	| Leucine-rich receptor-like protein kinase family protein | Chr4:18324826-18328416 FORWARD LENGTH=1196 | 201606	131772	5.99	30	1	1	0.03	1.3
AT4G39980.1	| 3-deoxy-D-arabino-heptulosonate 7-phosphate synthase 1 | Chr4:18539654-18541832 FORWARD LENGTH=525 | 201606	58456	8.28	46.45	1	1	0.24	5.3
AT5G01350.1	| UvrABC system C protein | Chr5:145865-146911 REVERSE LENGTH=72 | 201606	8027	9.86	30.17	1	1	0.65	13.9
AT5G01390.2	| DNAJ heat shock family protein | Chr5:160500-162199 REVERSE LENGTH=277 | 201606	30719	9.12	69.49	1	1	0.14	8.3
AT5G01750.1	| LURP-one-like protein (DUF567) | Chr5:290034-290685 FORWARD LENGTH=174 | 201606	19658	8.7	50.27	1	1	0.23	8
AT5G01770.1	| regulatory-associated protein of TOR 2 (RAPTOR2) | Chr5:294539-301773 REVERSE LENGTH=1336 | 201606	149371	6.04	36.04	1	1	0.03	1.6
AT5G03070.1	| importin alpha isoform 9 | Chr5:718468-721395 REVERSE LENGTH=519 | 201606	57047	5.67	85.1	1	1	0.08	3.1
AT5G03540.1	| exocyst subunit exo70 family protein A1 | Chr5:889606-893916 FORWARD LENGTH=638 | 201606	72424	8.16	36.64	1	1	0.06	1.4
AT5G03880.1	| Thioredoxin family protein | Chr5:1038674-1041453 REVERSE LENGTH=339 | 201606	37301	9.01	66.62	1	1	0.12	6.2
AT5G04430.1	| binding to TOMV RNA 1L (long form) | Chr5:1250602-1253523 REVERSE LENGTH=313 | 201606	33857	5.7	51.68	1	1	0.13	4.5
AT5G04740.1	| ACT domain-containing protein | Chr5:1368713-1371391 REVERSE LENGTH=301 | 201606	33335	5.27	45.12	1	1	0.13	3
AT5G04950.1	| nicotianamine synthase 1 | Chr5:1457876-1458838 REVERSE LENGTH=320 | 201606	35923	6.15	60.53	1	1	0.12	4.1
AT5G05170.1	| Cellulose synthase family protein | Chr5:1530401-1535090 REVERSE LENGTH=1065 | 201606	121031	7.66	28.22	1	1	0.15	3.9
AT5G05720.1	| RNA-binding (RRM/RBD/RNP motifs) family protein | Chr5:1716871-1719541 FORWARD LENGTH=451 | 201606	51130	7.54	28.7	1	1	0.08	1.6
AT5G05860.1	| UDP-glucosyl transferase 76C2 | Chr5:1765545-1767348 FORWARD LENGTH=450 | 201606	50963	5.28	27.32	1	1	0.08	3.1
AT5G06660.1	| transmembrane/coiled-coil protein (Protein of unknown function DUF106%2C transmembrane) | Chr5:2046863-2047453 FORWARD LENGTH=196 | 201606	21632	9.83	27.87	1	1	0.21	5.6
AT5G08610.1	| P-loop containing nucleoside triphosphate hydrolases superfamily protein | Chr5:2790341-2794059 FORWARD LENGTH=850 | 201606	94470	9.5	44.62	1	1	0.05	2.6
AT5G10270.1	| cyclin-dependent kinase C%3B1 | Chr5:3221715-3224674 REVERSE LENGTH=505 | 201606	57036	9.29	51.09	1	1	0.08	3.2
AT5G10290.1	| leucine-rich repeat transmembrane protein kinase family protein | Chr5:3235462-3238171 REVERSE LENGTH=613 | 201606	69185	5.85	38.29	1	1	0.06	1.1
AT5G10860.1	| Cystathionine beta-synthase (CBS) family protein | Chr5:3429173-3430142 REVERSE LENGTH=206 | 201606	22829	9.1	51.91	1	1	0.43	9.2
AT5G11040.1	| TRS120 | Chr5:3495332-3500610 FORWARD LENGTH=1186 | 201606	130654	5.87	27.04	1	1	0.07	1.4
AT5G11340.1	| Acyl-CoA N-acyltransferases (NAT) superfamily protein | Chr5:3619226-3621068 FORWARD LENGTH=164 | 201606	18826	7.57	34.36	1	1	0.24	6.1
AT5G11520.1	| aspartate aminotransferase 3 | Chr5:3685257-3687721 REVERSE LENGTH=449 | 201606	49152	9.34	37.08	1	1	0.09	3.6
AT5G11580.1	| Regulator of chromosome condensation (RCC1) family protein | Chr5:3718913-3721125 FORWARD LENGTH=553 | 201606	61189	5.08	43.25	1	1	0.07	3.3
AT5G11670.1	| NADP-malic enzyme 2 | Chr5:3754456-3758040 FORWARD LENGTH=588 | 201606	64771	6.01	58.66	1	1	0.07	4.3
AT5G11980.1	| conserved oligomeric Golgi complex component-related / COG complex component-like protein | Chr5:3868809-3872146 REVERSE LENGTH=569 | 201606	63696	5.06	40.97	1	1	0.07	2.3
AT5G12470.1	| UvrABC system C protein%2C putative (DUF3411) | Chr5:4044950-4047290 REVERSE LENGTH=386 | 201606	41582	7.01	68.77	1	1	0.65	14.8
AT5G13360.1	| Auxin-responsive GH3 family protein | Chr5:4283805-4286120 FORWARD LENGTH=594 | 201606	67760	5.26	58.34	1	1	0.13	3.7
AT5G13370.1	| Auxin-responsive GH3 family protein | Chr5:4286996-4289424 FORWARD LENGTH=595 | 201606	67791	5.49	58.34	1	1	0.06	3.4
AT5G13430.1	| Ubiquinol-cytochrome C reductase iron-sulfur subunit | Chr5:4305414-4307399 REVERSE LENGTH=272 | 201606	29817	8.63	43.63	1	1	0.15	7.4
AT5G13450.1	| delta subunit of Mt ATP synthase | Chr5:4310558-4311941 REVERSE LENGTH=238 | 201606	26362	9.25	40.71	1	1	0.37	12.6
AT5G13510.1	| Ribosomal protein L10 family protein | Chr5:4341294-4341956 FORWARD LENGTH=220 | 201606	24891	9.37	35.78	1	1	0.18	7.3
AT5G14060.1	| Aspartate kinase family protein | Chr5:4536143-4538993 FORWARD LENGTH=544 | 201606	60137	6.31	68.82	1	1	0.15	4.2
AT5G14250.1	| Proteasome component (PCI) domain protein | Chr5:4597970-4600561 FORWARD LENGTH=429 | 201606	48167	5.96	45.84	1	1	0.09	2.6
AT5G15090.1	| voltage dependent anion channel 3 | Chr5:4889641-4891389 REVERSE LENGTH=274 | 201606	29193	7.85	27.72	1	1	0.15	4.7
AT5G15250.1	| FTSH protease 6 | Chr5:4950411-4952777 REVERSE LENGTH=688 | 201606	74696	7.21	29.71	1	1	0.12	2.2
AT5G15450.1	| casein lytic proteinase B3 | Chr5:5014399-5018255 REVERSE LENGTH=968 | 201606	109047	5.93	38.56	1	1	0.08	4.2
AT5G15610.1	| Proteasome component (PCI) domain protein | Chr5:5079579-5081929 FORWARD LENGTH=442 | 201606	50306	5.29	44.5	1	1	0.39	6.8
AT5G16300.1	| Vps51/Vps67 family (components of vesicular transport) protein | Chr5:5338119-5342186 FORWARD LENGTH=1068 | 201606	119640	5.51	56.12	1	1	0.04	0.9
AT5G17990.1	| tryptophan biosynthesis 1 | Chr5:5957330-5959681 FORWARD LENGTH=444 | 201606	46947	6.9	53.44	1	1	0.3	8.6
AT5G18580.1	| tonneau 2 (TON2) | Chr5:6175154-6178214 FORWARD LENGTH=480 | 201606	55832	4.87	59.66	1	1	0.08	4.2
AT5G19180.1	| E1 C-terminal related 1 | Chr5:6453375-6455750 FORWARD LENGTH=454 | 201606	51136	5.46	28.6	1	1	0.08	4.2
AT5G19220.1	| ADP glucose pyrophosphorylase large subunit 1 | Chr5:6463931-6466775 REVERSE LENGTH=522 | 201606	58037	8.03	34.03	1	1	0.07	6.5
AT5G19290.1	| alpha/beta-Hydrolases superfamily protein | Chr5:6494113-6495105 FORWARD LENGTH=330 | 201606	37038	6.31	52.46	1	1	0.12	3.9
AT5G19485.1	| transferases/nucleotidyltransferase | Chr5:6573907-6576352 REVERSE LENGTH=456 | 201606	49746	7.23	63.92	1	1	0.09	3.1
AT5G19550.1	| aspartate aminotransferase 2 | Chr5:6598201-6601597 FORWARD LENGTH=405 | 201606	44467	6.8	75.9	1	1	0.1	3.2
AT5G20720.1	| chaperonin 20 | Chr5:7015015-7016354 FORWARD LENGTH=253 | 201606	26785	8.86	75.37	1	1	0.17	24.5
AT5G20920.1	| eukaryotic translation initiation factor 2 beta subunit | Chr5:7094994-7096661 REVERSE LENGTH=268 | 201606	30929	6.79	71.48	1	1	0.49	9.7
AT5G20990.1	| molybdopterin biosynthesis CNX1 protein / molybdenum cofactor biosynthesis enzyme CNX1 (CNX1) | Chr5:7128737-7133397 REVERSE LENGTH=670 | 201606	71747	5.94	42.27	1	1	0.06	1.8
AT5G22480.1	| ZPR1 zinc-finger domain protein | Chr5:7451643-7456168 REVERSE LENGTH=493 | 201606	54727	4.61	61.27	1	1	0.08	2.4
AT5G23310.1	| Fe superoxide dismutase 3 | Chr5:7850624-7852241 FORWARD LENGTH=263 | 201606	30512	8.62	86.73	1	1	0.14	6.5
AT5G24400.1	| NagB/RpiA/CoA transferase-like superfamily protein | Chr5:8330532-8331784 REVERSE LENGTH=325 | 201606	35964	7.64	52.09	1	1	0.26	10.2
AT5G26667.1	| P-loop containing nucleoside triphosphate hydrolases superfamily protein | Chr5:9276659-9277788 FORWARD LENGTH=208 | 201606	23281	6.36	36.07	1	1	0.7	12.5
AT5G26860.1	| lon protease 1 | Chr5:9451048-9456631 FORWARD LENGTH=985 | 201606	109667	5.63	73.6	1	1	0.08	3.8
AT5G27470.1	| seryl-tRNA synthetase / serine-tRNA ligase | Chr5:9695087-9697154 FORWARD LENGTH=451 | 201606	52052	6.27	61	1	1	0.17	5.8
AT5G28050.1	| Cytidine/deoxycytidylate deaminase family protein | Chr5:10044209-10045755 REVERSE LENGTH=185 | 201606	20388	5.64	54.37	1	1	0.22	9.7
AT5G35430.1	| Tetratricopeptide repeat (TPR)-like superfamily protein | Chr5:13662077-13665735 FORWARD LENGTH=786 | 201606	87652	6.26	128.15	1	1	0.1	4.7
AT5G35590.1	| proteasome alpha subunit A1 | Chr5:13765417-13767768 REVERSE LENGTH=246 | 201606	27391	5.6	76.77	1	1	0.16	13.4
AT5G35620.1	| Eukaryotic initiation factor 4E protein | Chr5:13824946-13826331 REVERSE LENGTH=198 | 201606	22614	5.49	42.16	1	1	0.44	19.7
AT5G35830.1	| Ankyrin repeat family protein | Chr5:14000313-14001416 REVERSE LENGTH=282 | 201606	31964	9.05	42.81	1	1	0.14	5
AT5G37450.1	| Leucine-rich repeat protein kinase family protein | Chr5:14852801-14857098 REVERSE LENGTH=935 | 201606	104437	6.8	30	1	1	0.08	1.4
AT5G38660.1	| acclimation of photosynthesis to environment | Chr5:15473285-15475497 REVERSE LENGTH=286 | 201606	31646	8.6	47.86	1	1	0.3	9.8
AT5G39090.1	| HXXXD-type acyl-transferase family protein | Chr5:15643612-15644958 FORWARD LENGTH=448 | 201606	50170	6.36	28.7	1	1	0.09	1.6
AT5G40390.1	| Raffinose synthase family protein | Chr5:16161720-16165085 FORWARD LENGTH=783 | 201606	87322	4.91	26.62	1	1	0.05	1.3
AT5G40890.1	| chloride channel A | Chr5:16381645-16384999 REVERSE LENGTH=775 | 201606	86093	6.81	50.56	1	1	0.05	2.2
AT5G41210.1	| glutathione S-transferase THETA 1 | Chr5:16492550-16493884 REVERSE LENGTH=245 | 201606	27750	9.5	41.29	1	1	0.16	4.5
AT5G42390.1	| Insulinase (Peptidase family M16) family protein | Chr5:16945308-16952647 FORWARD LENGTH=1265 | 201606	141374	6.13	44.1	1	1	0.09	2.8
AT5G42650.1	| allene oxide synthase | Chr5:17097803-17099359 REVERSE LENGTH=518 | 201606	58331	8.75	30.82	1	1	0.24	6.4
AT5G42790.1	| proteasome alpha subunit F1 | Chr5:17159270-17160975 REVERSE LENGTH=278 | 201606	30685	4.99	35.52	1	1	0.14	5.8
AT5G42970.1	| Proteasome component (PCI) domain protein | Chr5:17237470-17240649 REVERSE LENGTH=397 | 201606	45214	4.87	31.1	1	1	0.1	3
AT5G43500.1	| actin-related protein 9 | Chr5:17470038-17473429 FORWARD LENGTH=596 | 201606	66884	5.9	42.51	1	1	0.06	2.7
AT5G44090.1	| Calcium-binding EF-hand family protein | Chr5:17743264-17747909 REVERSE LENGTH=538 | 201606	62912	4.97	29.51	1	1	0.07	2
AT5G45390.1	| CLP protease P4 | Chr5:18396351-18397586 FORWARD LENGTH=292 | 201606	31535	5.37	119.85	1	1	0.14	8.2
AT5G45950.1	| GDSL-like Lipase/Acylhydrolase superfamily protein | Chr5:18634155-18636512 FORWARD LENGTH=357 | 201606	40228	8.34	40.08	1	1	0.23	6.4
AT5G46110.1	| Glucose-6-phosphate/phosphate translocator-like protein | Chr5:18697606-18700212 FORWARD LENGTH=410 | 201606	44775	9.75	32.02	1	1	0.1	2.4
AT5G46790.1	| PYR1-like 1 | Chr5:18984063-18984728 REVERSE LENGTH=221 | 201606	25516	5.32	39.19	1	1	0.18	8.1
AT5G46800.1	| Mitochondrial substrate carrier family protein | Chr5:18988779-18989810 REVERSE LENGTH=300 | 201606	31174	9.55	29.99	1	1	0.3	7.3
AT5G47330.1	| alpha/beta-Hydrolases superfamily protein | Chr5:19207170-19208711 FORWARD LENGTH=314 | 201606	34850	6.71	27.4	1	1	0.13	3.8
AT5G47540.1	| Mo25 family protein | Chr5:19283265-19285328 REVERSE LENGTH=343 | 201606	39604	6.57	40.36	1	1	0.11	5
AT5G48120.1	| ARM repeat superfamily protein | Chr5:19508210-19514774 REVERSE LENGTH=1134 | 201606	126228	5.69	31.36	1	1	0.07	1.5
AT5G48300.1	| ADP glucose pyrophosphorylase 1 | Chr5:19570326-19572557 FORWARD LENGTH=520 | 201606	56957	6.13	90.12	1	1	0.08	4.2
AT5G48620.1	| Disease resistance protein (CC-NBS-LRR class) family | Chr5:19717406-19720932 FORWARD LENGTH=908 | 201606	105180	6.37	30.8	1	1	0.08	2.1
AT5G48780.1	| disease resistance protein (TIR-NBS class) | Chr5:19777511-19779632 FORWARD LENGTH=639 | 201606	73210	8.57	30.8	1	1	0.06	1.1
AT5G48800.1	| Phototropic-responsive NPH3 family protein | Chr5:19786881-19789003 FORWARD LENGTH=614 | 201606	70247	6.48	63.6	1	1	0.06	4.2
AT5G48860.1	| hypothetical protein | Chr5:19811651-19812865 REVERSE LENGTH=175 | 201606	20187	11.54	30.42	1	1	0.23	4
AT5G48940.1	| Leucine-rich repeat transmembrane protein kinase family protein | Chr5:19839785-19843744 FORWARD LENGTH=1135 | 201606	124902	5.48	30	1	1	0.03	1.1
AT5G49500.1	| Signal recognition particle%2C SRP54 subunit protein | Chr5:20077556-20080206 REVERSE LENGTH=497 | 201606	55454	9.16	68.46	1	1	0.08	2.6
AT5G49570.1	| peptide-N-glycanase 1 | Chr5:20112071-20116125 REVERSE LENGTH=721 | 201606	83250	5.37	30.9	1	1	0.05	1.7
AT5G49830.1	| exocyst complex component 84B | Chr5:20250803-20254766 REVERSE LENGTH=752 | 201606	83267	5.21	31.96	1	1	0.05	0.9
AT5G50260.1	| Cysteine proteinases superfamily protein | Chr5:20455605-20456862 FORWARD LENGTH=361 | 201606	41138	7.15	28.7	1	1	0.11	1.9
AT5G50750.1	| reversibly glycosylated polypeptide 4 | Chr5:20641066-20642470 FORWARD LENGTH=364 | 201606	42238	6.56	38.5	1	1	0.1	6.9
AT5G50840.1	| alpha-taxilin-like protein | Chr5:20685903-20688739 FORWARD LENGTH=404 | 201606	46995	5.42	61.34	1	1	0.09	2.2
AT5G51070.1	| Clp ATPase | Chr5:20764479-20768481 FORWARD LENGTH=945 | 201606	103627	5.89	62.31	1	1	0.04	2.2
AT5G51430.1	| conserved oligomeric Golgi complex component-related / COG complex component-like protein | Chr5:20887044-20890795 REVERSE LENGTH=836 | 201606	92772	5.1	47.7	1	1	0.05	1.7
AT5G51750.1	| subtilase 1.3 | Chr5:21020266-21022608 FORWARD LENGTH=780 | 201606	85467	9.39	44.85	1	1	0.05	2.9
AT5G53170.1	| FTSH protease 11 | Chr5:21563023-21567922 REVERSE LENGTH=806 | 201606	89061	5.8	27.14	1	1	0.1	2.9
AT5G53530.1	| vacuolar protein sorting 26A | Chr5:21746275-21748156 REVERSE LENGTH=302 | 201606	35242	7.67	37.8	1	1	0.27	14.6
AT5G53850.1	| haloacid dehalogenase-like hydrolase family protein | Chr5:21861617-21864817 REVERSE LENGTH=402 | 201606	45336	5.87	28.67	1	1	0.1	3.2
AT5G54060.1	| UDP-glucose:flavonoid 3-o-glucosyltransferase | Chr5:21936902-21938308 REVERSE LENGTH=468 | 201606	52585	5.95	44.05	1	1	0.08	1.5
AT5G54270.1	| light-harvesting chlorophyll B-binding protein 3 | Chr5:22038424-22039383 FORWARD LENGTH=265 | 201606	28745	4.96	54.86	1	1	0.15	3.8
AT5G54430.1	| Adenine nucleotide alpha hydrolases-like superfamily protein | Chr5:22097563-22099693 REVERSE LENGTH=242 | 201606	26414	6.07	79.52	1	1	0.37	7.4
AT5G54440.1	| CLUB | Chr5:22100056-22107695 FORWARD LENGTH=1259 | 201606	142018	5.81	56.34	1	1	0.06	3.3
AT5G54630.1	| zinc finger protein-like protein | Chr5:22192607-22194260 REVERSE LENGTH=472 | 201606	51836	9.45	30.56	1	1	0.08	1.7
AT5G54770.1	| thiazole biosynthetic enzyme%2C chloroplast (ARA6) (THI1) (THI4) | Chr5:22246634-22247891 FORWARD LENGTH=349 | 201606	36755	5.82	45.32	1	1	0.12	3.7
AT5G54900.1	| RNA-binding protein 45A | Chr5:22295412-22298126 FORWARD LENGTH=387 | 201606	42411	6.09	73.71	1	1	0.1	3.4
AT5G54960.1	| pyruvate decarboxylase-2 | Chr5:22310858-22312681 REVERSE LENGTH=607 | 201606	66802	5.63	83.61	1	1	0.13	3.3
AT5G55220.1	| trigger factor type chaperone family protein | Chr5:22397677-22400678 FORWARD LENGTH=547 | 201606	62151	5.25	48.89	1	1	0.14	2.6
AT5G55280.1	| homolog of bacterial cytokinesis Z-ring protein FTSZ 1-1 | Chr5:22420740-22422527 REVERSE LENGTH=433 | 201606	45708	6.92	53.04	1	1	0.2	4.8
AT5G56140.1	| RNA-binding KH domain-containing protein | Chr5:22725462-22727932 FORWARD LENGTH=315 | 201606	34020	7.88	38.17	1	1	0.13	4.1
AT5G57020.1	| myristoyl-CoA:protein N-myristoyltransferase | Chr5:23075451-23076755 FORWARD LENGTH=434 | 201606	50052	6.34	40.79	1	1	0.18	7.1
AT5G58470.1	| TBP-associated factor 15B | Chr5:23638566-23640854 REVERSE LENGTH=422 | 201606	42746	8.73	36.19	1	1	0.21	5.9
AT5G61140.2	| U5 small nuclear ribonucleoprotein helicase | Chr5:24589999-24603311 FORWARD LENGTH=2157 | 201606	245685	6.42	40.88	1	1	0.03	1.5
AT5G61450.1	| P-loop containing nucleoside triphosphate hydrolases superfamily protein | Chr5:24710240-24712882 REVERSE LENGTH=447 | 201606	50440	6.13	31.93	1	1	0.09	2.2
AT5G62560.1	| RING/U-box superfamily protein with ARM repeat domain-containing protein | Chr5:25110073-25111752 FORWARD LENGTH=559 | 201606	60883	5.56	39.7	1	1	0.07	3.8
AT5G62600.1	| ARM repeat superfamily protein | Chr5:25123337-25132473 REVERSE LENGTH=958 | 201606	108160	5.62	38.29	1	1	0.04	1.5
AT5G63190.1	| MA3 domain-containing protein | Chr5:25346145-25348563 FORWARD LENGTH=702 | 201606	77907	5.07	39.05	1	1	0.05	2
AT5G63310.1	| nucleoside diphosphate kinase 2 | Chr5:25372122-25373838 REVERSE LENGTH=231 | 201606	25819	9.14	40.08	1	1	0.17	7.8
AT5G64040.1	| photosystem I reaction center subunit PSI-N%2C chloroplast%2C putative / PSI-N%2C putative (PSAN) | Chr5:25628724-25629409 REVERSE LENGTH=171 | 201606	18702	9.11	48.67	1	1	0.25	10.5
AT5G64050.1	| glutamate tRNA synthetase | Chr5:25630196-25633099 REVERSE LENGTH=570 | 201606	63768	7.62	28.03	1	1	0.14	3.3
AT5G65220.1	| Ribosomal L29 family protein | Chr5:26061301-26062506 FORWARD LENGTH=173 | 201606	19365	10.51	93.18	1	1	0.24	12.1
AT5G66030.1	| Golgi-localized GRIP domain-containing protein | Chr5:26405133-26409888 REVERSE LENGTH=788 | 201606	89976	4.93	39.25	1	1	0.05	2.3
AT5G66190.1	| ferredoxin-NADP[+]-oxidoreductase 1 | Chr5:26451203-26453012 REVERSE LENGTH=360 | 201606	40643	8.32	37.89	1	1	0.23	7.2
AT5G66280.1	| GDP-D-mannose 4%2C6-dehydratase 1 | Chr5:26476434-26477519 FORWARD LENGTH=361 | 201606	40939	6.61	60.14	1	1	0.11	2.8
AT5G66710.1	| Protein kinase superfamily protein | Chr5:26636609-26638564 FORWARD LENGTH=405 | 201606	46268	8.93	51.09	1	1	0.09	3.7
ATCG00190.1	| RNA polymerase subunit beta | ChrC:23111-26329 REVERSE LENGTH=1072 | 201606	121611	8.68	66.69	1	1	0.03	1.5
ATCG00330.1	| chloroplast ribosomal protein S14 | ChrC:36938-37240 REVERSE LENGTH=100 | 201606	11849	11.23	40.75	1	1	0.41	10
ATCG00540.1	| photosynthetic electron transfer A | ChrC:61657-62619 FORWARD LENGTH=320 | 201606	35449	8.34	55.71	1	1	0.12	2.5
ATCG00670.1	| plastid-encoded CLP P | ChrC:69910-71882 REVERSE LENGTH=196 | 201606	22140	4.98	109.89	1	1	0.2	7.7
ATCG00680.1	| photosystem II reaction center protein B | ChrC:72371-73897 FORWARD LENGTH=508 | 201606	56172	6.4	38.59	1	1	0.25	7.3
ATCG00810.1	| ribosomal protein L22 | ChrC:83467-83949 REVERSE LENGTH=160 | 201606	18803	9.7	87.91	1	1	0.55	17.5
ATCG00820.1	| ribosomal protein S19 | ChrC:84005-84283 REVERSE LENGTH=92 | 201606	10570	10.77	63.65	1	1	0.47	12
ATCG00830.1	| ribosomal protein L2 | ChrC:84337-85843 REVERSE LENGTH=274 | 201606	30131	10.85	65.04	1	1	0.32	11.3
ATCG00905.1	| ribosomal protein S12C | ChrC:97999-98793 REVERSE LENGTH=85 | 201606	9365	11.07	36.57	1	1	1.37	28.2
ATMG00070.1	| NADH dehydrogenase subunit 9 | ChrM:23663-24235 REVERSE LENGTH=190 | 201606	22787	7.79	51.08	1	1	0.2	5.3

## Sheet: Supplementary Data Set 1B
Supplementary Data Set 1. Proteins identified in an ABCE2:YFP co-immunoprecipitation assay
Supplementary Data Set 1B. Peptides identified in replicate 1
Protein	Peptide number / sequence	Modification(s)	Position of the modification(s)	Peptide score	Peptide spectrum matches (PSMs)	Ion mass/charge (m/z)	Theoretical mass (Da)	Charge (z)	Calculated mass (Da)	Theoretical - calculated mass (Da)	Missed trypsin cleavage sites	e-value
AT4G19210.1	57				171
	FTSPPDWQEILTHFR			130.44	41	625.311	1872.91	3	1872.92	-0.003	0	2.1e-12
	AVKGNVGEVLDQKDER			122.05	1	586.305	1755.89	3	1755.91	-0.019	2	1.7e-11
	VAETPQESAEEIQSYAR			118.97	6	954.45	1906.88	2	1906.89	-0.005	0	5.5e-11
	PADIYLIDEPSAYLDSEQR			116.55	3	732.353	2194.04	3	2194.04	-0.006	0	3.7e-11
	KAELCADLELNQVIDR			107.33	1	943.987	1885.96	2	1885.96	0.003	1	1.2e-10
	PGQVLGLVGTNGIGK			105.69	8	705.407	1408.8	2	1408.8	-0.004	0	3.2e-09
	VALTLCLGKPADIYLIDEPSAYLDSEQR			105.43	1	1050.87	3149.59	3	3149.59	-0.009	1	1.6e-10
	MLAGLLKPDDTEGPDR	Oxidation (M)	0.4000000000000000.0	99.24	4	581.956	1742.85	3	1742.85	-0.003	1	1.5e-09
	CPFEAIQIINLPR			98.52	3	785.92	1569.83	2	1569.83	-0.008	0	6.7e-10
	EGINIFLAGFVPTENLR			98.01	4	630.673	1889	3	1889.01	-0.006	0	3.6e-08
	PGAYGVVTLPFSVR			97.5	4	731.903	1461.79	2	1461.8	-0.006	0	1e-08
	AELCADLELNQVIDR			94.7	2	879.933	1757.85	2	1757.86	-0.011	0	2.1e-09
	AELCADLELNQVIDRDVENLSGGELQR			92.29	1	764.876	3055.47	4	3055.49	-0.013	1	3.7e-09
	MLAGLLKPDDTEGPDR			91.93	2	576.627	1726.86	3	1726.86	0.002	1	1.5e-08
	VSEGEFTDSQIIVMLGENGTGK	Oxidation (M)	0.0000000000000400000000.0	90.69	1	776.703	2327.09	3	2326.1	0.987	0	3.1e-09
	AIIKPQYVDHIPR			90.35	6	388.226	1548.88	4	1548.88	-0.002	1	4.5e-09
	KTAFVVEHDFIMATYLADR	Oxidation (M)	0.0000000000040000000.0	89.88	2	748.381	2242.12	3	2242.11	0.011	1	3.7e-09
	TAFVVEHDFIMATYLADR	Oxidation (M)	0.000000000040000000.0	88.89	4	705.678	2114.01	3	2114.01	-0.003	0	4.6e-09
	GNVGEVLDQKDERDK			87.54	1	567.947	1700.82	3	1700.83	-0.013	2	1.9e-08
	GNVGEVLDQKDER			87.49	6	486.91	1457.71	3	1457.71	-0.004	1	7.4e-09
	TAFVVEHDFIMATYLADR			87.4	3	700.344	2098.01	3	2098.02	-0.01	0	2.9e-08
	EGINIFLAGFVPTENLR			83.58	2	945.507	1889	2	1889.01	-0.006	0	1e-06
	VALTLCLGKPADIYLIDEPSAYLDSEQR			83.16	1	788.418	3149.64	4	3149.59	0.047	1	1.6e-08
	GNVGEVLDQKDER			80.6	1	729.86	1457.71	2	1457.71	-0.005	1	1.6e-07
	LPVPRPGQVLGLVGTNGIGK			80.05	1	658.06	1971.16	3	1971.16	-0.005	1	3.1e-08
	AELCADLELNQVIDR			80.05	1	586.962	1757.86	3	1757.86	0.002	0	1.8e-07
	AIIKPQYVDHIPR			79.17	1	517.302	1548.88	3	1548.88	0.006	1	3.8e-08
	KCPFEAIQIINLPR			78.39	1	566.981	1697.92	3	1697.93	-0.009	1	2.5e-06
	EGINIFLAGFVPTENLR	Glu->pyro-Glu (N-term E)	3.00000000000000000.0	78.21	1	625.001	1871.98	3	1870.99	0.988	0	5.5e-07
	ILEDNLKAIIKPQYVDHIPR			75.57	1	475.875	2374.34	5	2374.34	0.002	2	8.2e-08
	GNVGEVLDQK			73.94	2	529.776	1057.54	2	1057.54	-0.002	0	4.9e-07
	VAETPQESAEEIQSYAR			72.26	1	636.637	1906.89	3	1906.89	-0.003	0	4.8e-07
	GSELQNYFTR			69.79	4	607.792	1213.57	2	1213.57	-0.003	0	1.6e-05
	CPFEAIQIINLPR			68.6	3	524.283	1569.83	3	1569.83	-0.005	0	1.3e-06
	DVENLSGGELQR			65.39	2	658.824	1315.63	2	1315.64	-0.003	0	5.6e-05
	DLEKDTTHR			63.07	1	372.186	1113.54	3	1113.54	-0.004	1	8e-05
	EIPEFNVSYKPQK	Glu->pyro-Glu (N-term E)	3.0000000000000.0	59.3	1	780.899	1559.78	2	1559.8	-0.016	1	2.8e-06
	EIPEFNVSYKPQK			59.18	3	526.942	1577.8	3	1577.81	-0.006	1	1.1e-05
	EIPEFNVSYKPQK			58.16	1	789.91	1577.81	2	1577.81	-0.002	1	3e-05
	INKLESTKDR			56.9	1	401.896	1202.67	3	1202.66	0.004	2	6.6e-05
	IAIVSSDR			55.59	5	430.744	859.474	2	859.476	-0.003	0	0.00091
	FRDESLTFK			55.48	5	571.794	1141.57	2	1141.58	-0.004	1	0.00054
	LCIEVTVGSK			54.37	5	553.298	1104.58	2	1104.59	-0.004	0	0.0011
	YKYPTMTK	Oxidation (M)	0.00000400.0	47.33	1	350.178	1047.51	3	1046.51	1.001	1	0.0003
	LAFISEELCIGCGICVK			45.07	1	656.994	1967.96	3	1967.95	0.007	0	0.0001
	ILEDNLK			44.93	7	422.742	843.469	2	843.47	-0.001	0	0.0083
	PGQVLGLVGTNGIGKSTALK			44.38	1	637.367	1909.08	3	1909.1	-0.02	1	6.9e-05
	KCPFEAIQIINLPR			43.33	1	425.489	1697.93	4	1697.93	0	1	0.00034
	VALTLCLGK			42.77	1	487.787	973.56	2	973.563	-0.003	0	0.014
	ILAGKLKPNLGR			40.66	1	427.277	1278.81	3	1278.81	-0.004	2	0.00015
	GNVGEVLDQKDERDK			39.24	1	426.464	1701.83	4	1700.83	0.995	2	0.00021
	DESLTFK			38	1	420.212	838.409	2	838.407	0.002	0	0.026
	INKLESTK			37.92	1	466.776	931.538	2	931.534	0.005	1	0.016
	DPTNFRPR			37.07	1	501.757	1001.5	2	1001.5	-0.005	1	0.0037
	YGANTFK			35.83	4	400.7	799.385	2	799.386	-0.002	0	0.0072
	KTAFVVEHDFIMATYLADR			32.89	1	743.373	2227.1	3	2226.11	0.983	1	0.00082
	AVKGNVGEVLDQK			31.1	1	453.248	1356.72	3	1355.74	0.98	1	0.0045
AT5G56010.1	54				94
	KPEEINKEEYAAFYK			122.42	2	620.309	1857.9	3	1857.91	-0.01	2	2.6e-11
	GIEVLYMVDAIDEYAIGQLK			118.95	1	747.384	2239.13	3	2239.14	-0.015	0	7e-12
	KPEEINKEEYAAFYK			111.22	1	930.471	1858.93	2	1857.91	1.012	2	1.8e-09
	TMEINPENSIMDELRK	2 Oxidation (M)	0.0400000000400000.0	110.01	2	651.311	1950.91	3	1950.9	0.01	1	2e-10
	HNDDEQYVWESQAGGSFTVTR			102.28	5	809.694	2426.06	3	2425.06	1.002	0	2.6e-10
	ELISNSSDALDK			100.81	4	646.32	1290.63	2	1290.63	-0.004	0	2.2e-08
	ELISNSSDALDKIR	Glu->pyro-Glu (N-term E)	3.00000000000000.0	98.72	1	771.906	1541.8	2	1541.81	-0.008	1	1.6e-09
	ELISNSSDALDKIR			95.05	5	520.944	1559.81	3	1559.82	-0.005	1	8.5e-08
	GIVDSEDLPLNISR			94.59	4	764.402	1526.79	2	1526.79	-0.005	0	5.3e-09
	KAVENSPFLEK			93.21	1	631.342	1260.67	2	1260.67	-0.001	1	1.2e-07
	TMEINPENSIMDELR	2 Oxidation (M)	0.040000000040000.0	90.67	1	912.904	1823.79	2	1822.81	0.986	0	2.6e-08
	SLSNDWEEHLAVK			90.51	1	764.375	1526.74	2	1526.74	-0.001	0	1.8e-07
	EGLKLDETEDEKK			89.78	1	511.924	1532.75	3	1532.76	-0.007	2	2.7e-07
	VIKDVLGDKVEK			88.54	2	448.269	1341.79	3	1341.79	-0.002	2	1.8e-07
	SGDELTSLKDYVTR			87.82	2	792.397	1582.78	2	1582.78	-0.004	1	2.9e-08
	SGDELTSLKDYVTR			85.46	2	528.601	1582.78	3	1582.78	-0.003	1	9.7e-09
	LDGQPELFIHIIPDK			82.23	2	578.984	1733.93	3	1733.93	-0.004	0	6e-08
	SLSNDWEEHLAVK			81.56	1	509.917	1526.73	3	1526.74	-0.006	0	1.4e-06
	ADLVNNLGTIAR			80.28	3	628.848	1255.68	2	1255.69	-0.007	0	1.9e-06
	AVENSPFLEK			78.51	3	567.294	1132.57	2	1132.58	-0.003	0	1.4e-06
	RVFIMDNCEDIIPEYLGFVK	Oxidation (M)	0.00004000000000000000.0	75.47	1	825.403	2473.19	3	2473.2	-0.016	1	8.4e-08
	EGQNDIFYITGESKK			74.67	1	576.95	1727.83	3	1727.84	-0.008	1	1e-07
	HFSVEGQLEFK			74.31	5	660.829	1319.64	2	1319.65	-0.008	0	9.5e-06
	IKEVSHEWDLVNK			71.5	1	798.916	1595.82	2	1595.83	-0.013	1	5e-06
	KPEEINKEEYAAFYK			70.02	1	465.486	1857.91	4	1857.91	0	2	5.1e-07
	LGIHEDSQNR			69.28	2	390.194	1167.56	3	1167.56	-0.003	0	2.8e-06
	VFIMDNCEDIIPEYLGFVK	Oxidation (M)	0.0004000000000000000.0	67.94	2	773.385	2317.13	3	2317.1	0.031	0	4.7e-07
	EVSHEWDLVNK			65.51	1	678.328	1354.64	2	1354.65	-0.01	0	2.2e-05
	EGLKLDETEDEKK			63.43	2	384.196	1532.76	4	1532.76	-0.002	2	0.00012
	IKEVSHEWDLVNK			61.76	1	532.95	1595.83	3	1595.83	-0.003	1	8.4e-06
	KHSEFISYPISLWIEK			61.72	1	659.682	1976.02	3	1976.04	-0.016	1	1.2e-05
	HSEFISYPISLWIEK			61.04	2	616.987	1847.94	3	1847.95	-0.006	0	2e-06
	APFDLFDTK			60.65	2	527.264	1052.51	2	1052.52	-0.005	0	2.3e-05
	EGQNDIFYITGESK			59.92	1	800.874	1599.73	2	1599.74	-0.008	0	2.4e-06
	SGDELTSLK			59.56	1	475.247	948.479	2	948.476	0.002	0	7.9e-05
	EDQMEYIEER	Oxidation (M)	0.0004000000.0	59.29	2	679.281	1356.55	2	1356.55	-0.002	0	1.9e-05
	VIKDVLGDK			55.77	1	493.79	985.565	2	985.581	-0.016	1	0.00028
	MKEGQNDIFYITGESK	Oxidation (M)	0.4000000000000000.0	55.26	1	625.963	1874.87	3	1874.87	-0.005	1	7.6e-06
	RAPFDLFDTK			53.31	2	605.314	1208.61	2	1208.62	-0.006	1	0.00062
	AILFVPK			49.33	3	394.256	786.497	2	786.5	-0.004	0	0.0024
	ELISNSSDALDKIR	Glu->pyro-Glu (N-term E)	3.00000000000000.0	49.16	1	514.944	1541.81	3	1541.81	0.004	1	3.2e-05
	KAVENSPFLEK			48.4	1	421.232	1260.67	3	1260.67	0.003	1	0.0013
	SKLDGQPELFIHIIPDK			48.11	1	651.024	1950.05	3	1949.06	0.988	1	3.1e-05
	EKFEGLCK			45.06	1	505.749	1009.48	2	1009.49	-0.007	1	0.0044
	HFSVEGQLEFK			44.84	2	440.89	1319.65	3	1319.65	-0.004	0	0.00069
	FESLTDK			43.82	2	420.21	838.406	2	838.407	-0.001	0	0.0066
	KTMEINPENSIMDELR	2 Oxidation (M)	0.0040000000040000.0	43.01	1	651.305	1950.89	3	1950.9	-0.009	1	0.00011
	APFDLFDTKK			39.52	1	591.31	1180.61	2	1180.61	-0.007	1	0.00037
	MKEGQNDIFYITGESKK	Oxidation (M)	0.40000000000000000.0	38.54	1	501.75	2002.97	4	2002.97	0.002	2	0.00024
	FYEAFSK			34.09	2	446.215	890.415	2	890.417	-0.003	0	0.006
	KHSEFISYPISLWIEK			33.69	1	495.015	1976.03	4	1976.04	-0.008	1	0.0029
	SKLDGQPELFIHIIPDK			33.47	1	488.27	1949.05	4	1949.06	-0.011	1	0.00073
	MKEGQNDIFYITGESK			32.51	1	620.637	1858.89	3	1858.88	0.012	1	0.00089
	DVLGDKVEK			32.2	1	501.772	1001.53	2	1001.54	-0.009	1	0.046
AT5G56030.1	53				92
	KPEEINKEEYAAFYK			122.42	2	620.309	1857.9	3	1857.91	-0.01	2	2.6e-11
	GIEVLYMVDAIDEYAIGQLK			118.95	1	747.384	2239.13	3	2239.14	-0.015	0	7e-12
	KPEEINKEEYAAFYK			111.22	1	930.471	1858.93	2	1857.91	1.012	2	1.8e-09
	TMEINPENSIMDELRK	2 Oxidation (M)	0.0400000000400000.0	110.01	2	651.311	1950.91	3	1950.9	0.01	1	2e-10
	HNDDEQYVWESQAGGSFTVTR			102.28	5	809.694	2426.06	3	2425.06	1.002	0	2.6e-10
	ELISNSSDALDK			100.81	4	646.32	1290.63	2	1290.63	-0.004	0	2.2e-08
	ELISNSSDALDKIR	Glu->pyro-Glu (N-term E)	3.00000000000000.0	98.72	1	771.906	1541.8	2	1541.81	-0.008	1	1.6e-09
	ELISNSSDALDKIR			95.05	5	520.944	1559.81	3	1559.82	-0.005	1	8.5e-08
	GIVDSEDLPLNISR			94.59	4	764.402	1526.79	2	1526.79	-0.005	0	5.3e-09
	KAVENSPFLEK			93.21	1	631.342	1260.67	2	1260.67	-0.001	1	1.2e-07
	TMEINPENSIMDELR	2 Oxidation (M)	0.040000000040000.0	90.67	1	912.904	1823.79	2	1822.81	0.986	0	2.6e-08
	SLSNDWEEHLAVK			90.51	1	764.375	1526.74	2	1526.74	-0.001	0	1.8e-07
	EGLKLDETEDEKK			89.78	1	511.924	1532.75	3	1532.76	-0.007	2	2.7e-07
	VIKDVLGDKVEK			88.54	2	448.269	1341.79	3	1341.79	-0.002	2	1.8e-07
	SGDELTSLKDYVTR			87.82	2	792.397	1582.78	2	1582.78	-0.004	1	2.9e-08
	SGDELTSLKDYVTR			85.46	2	528.601	1582.78	3	1582.78	-0.003	1	9.7e-09
	LDGQPELFIHIIPDK			82.23	2	578.984	1733.93	3	1733.93	-0.004	0	6e-08
	SLSNDWEEHLAVK			81.56	1	509.917	1526.73	3	1526.74	-0.006	0	1.4e-06
	ADLVNNLGTIAR			80.28	3	628.848	1255.68	2	1255.69	-0.007	0	1.9e-06
	AVENSPFLEK			78.51	3	567.294	1132.57	2	1132.58	-0.003	0	1.4e-06
	RVFIMDNCEDIIPEYLGFVK	Oxidation (M)	0.00004000000000000000.0	75.47	1	825.403	2473.19	3	2473.2	-0.016	1	8.4e-08
	EGQNDIFYITGESKK			74.67	1	576.95	1727.83	3	1727.84	-0.008	1	1e-07
	HFSVEGQLEFK			74.31	5	660.829	1319.64	2	1319.65	-0.008	0	9.5e-06
	IKEVSHEWDLVNK			71.5	1	798.916	1595.82	2	1595.83	-0.013	1	5e-06
	KPEEINKEEYAAFYK			70.02	1	465.486	1857.91	4	1857.91	0	2	5.1e-07
	LGIHEDSQNR			69.28	2	390.194	1167.56	3	1167.56	-0.003	0	2.8e-06
	VFIMDNCEDIIPEYLGFVK	Oxidation (M)	0.0004000000000000000.0	67.94	2	773.385	2317.13	3	2317.1	0.031	0	4.7e-07
	EVSHEWDLVNK			65.51	1	678.328	1354.64	2	1354.65	-0.01	0	2.2e-05
	EGLKLDETEDEKK			63.43	2	384.196	1532.76	4	1532.76	-0.002	2	0.00012
	IKEVSHEWDLVNK			61.76	1	532.95	1595.83	3	1595.83	-0.003	1	8.4e-06
	KHSEFISYPISLWIEK			61.72	1	659.682	1976.02	3	1976.04	-0.016	1	1.2e-05
	HSEFISYPISLWIEK			61.04	2	616.987	1847.94	3	1847.95	-0.006	0	2e-06
	APFDLFDTK			60.65	2	527.264	1052.51	2	1052.52	-0.005	0	2.3e-05
	EGQNDIFYITGESK			59.92	1	800.874	1599.73	2	1599.74	-0.008	0	2.4e-06
	SGDELTSLK			59.56	1	475.247	948.479	2	948.476	0.002	0	7.9e-05
	VIKDVLGDK			55.77	1	493.79	985.565	2	985.581	-0.016	1	0.00028
	MKEGQNDIFYITGESK	Oxidation (M)	0.4000000000000000.0	55.26	1	625.963	1874.87	3	1874.87	-0.005	1	7.6e-06
	RAPFDLFDTK			53.31	2	605.314	1208.61	2	1208.62	-0.006	1	0.00062
	AILFVPK			49.33	3	394.256	786.497	2	786.5	-0.004	0	0.0024
	ELISNSSDALDKIR	Glu->pyro-Glu (N-term E)	3.00000000000000.0	49.16	1	514.944	1541.81	3	1541.81	0.004	1	3.2e-05
	KAVENSPFLEK			48.4	1	421.232	1260.67	3	1260.67	0.003	1	0.0013
	SKLDGQPELFIHIIPDK			48.11	1	651.024	1950.05	3	1949.06	0.988	1	3.1e-05
	EKFEGLCK			45.06	1	505.749	1009.48	2	1009.49	-0.007	1	0.0044
	HFSVEGQLEFK			44.84	2	440.89	1319.65	3	1319.65	-0.004	0	0.00069
	FESLTDK			43.82	2	420.21	838.406	2	838.407	-0.001	0	0.0066
	KTMEINPENSIMDELR	2 Oxidation (M)	0.0040000000040000.0	43.01	1	651.305	1950.89	3	1950.9	-0.009	1	0.00011
	APFDLFDTKK			39.52	1	591.31	1180.61	2	1180.61	-0.007	1	0.00037
	MKEGQNDIFYITGESKK	Oxidation (M)	0.40000000000000000.0	38.54	1	501.75	2002.97	4	2002.97	0.002	2	0.00024
	FYEAFSK			34.09	2	446.215	890.415	2	890.417	-0.003	0	0.006
	KHSEFISYPISLWIEK			33.69	1	495.015	1976.03	4	1976.04	-0.008	1	0.0029
	SKLDGQPELFIHIIPDK			33.47	1	488.27	1949.05	4	1949.06	-0.011	1	0.00073
	MKEGQNDIFYITGESK			32.51	1	620.637	1858.89	3	1858.88	0.012	1	0.00089
	DVLGDKVEK			32.2	1	501.772	1001.53	2	1001.54	-0.009	1	0.046
AT5G02500.1	51				101
	SINPDEAVAYGAAVQGAILSGEGNEK			134.71	3	854.085	2559.23	3	2559.24	-0.013	0	2.3e-13
	VQDLLLLDVTPLSLGLETAGGVMTTLIPR	Oxidation (M)	0.00000000000000000000004000000.0	131.17	1	1017.89	3050.66	3	3050.69	-0.029	0	7.6e-13
	IINEPTAAAIAYGLDKK			127.26	10	596.667	1786.98	3	1786.98	-0.004	1	3.2e-12
	NQVAMNPVNTVFDAKR	Oxidation (M)	0.0000400000000000.0	123.64	1	607.307	1818.9	3	1818.9	-0.004	1	4.2e-12
	ATAGDTHLGGEDFDNR			119.17	4	559.248	1674.72	3	1674.72	-0.001	0	6.7e-12
	GEGPAIGIDLGTTYSCVGVWQHDR			116.76	1	863.413	2587.22	3	2587.21	0.006	0	1.1e-11
	ATAGDTHLGGEDFDNR			116.41	1	838.37	1674.72	2	1674.72	0.001	0	3.2e-11
	VQDLLLLDVTPLSLGLETAGGVMTTLIPR			113.52	1	1012.55	3034.64	3	3034.7	-0.063	0	2.3e-11
	IQAGPADKPMIYVEYK	Oxidation (M)	0.0000000004000000.0	105.54	1	613.646	1837.91	3	1837.93	-0.014	1	4.5e-10
	EQVFSTYSDNQPGVLIQVYEGER			100.72	1	886.759	2657.25	3	2657.26	-0.007	0	3.6e-10
	IINEPTAAAIAYGLDKK			96.88	1	894.496	1786.98	2	1786.98	-0.005	1	1.4e-09
	IINEPTAAAIAYGLDK			96.48	2	830.446	1658.88	2	1658.89	-0.011	0	1.7e-09
	TLSSTAQTTIEIDSLYEGIDFYSTITR			94.67	1	1009.16	3024.47	3	3024.48	-0.013	0	1.3e-09
	NQVAMNPVNTVFDAK	Oxidation (M)	0.000040000000000.0	92.33	3	832.413	1662.81	2	1662.8	0.007	0	2.2e-09
	FSDSSVQSDMKLWPFK	Oxidation (M)	0.0000000004000000.0	87.55	1	959.448	1916.88	2	1916.9	-0.017	1	6.2e-09
	TTPSYVAFTDSER			82.06	5	737.348	1472.68	2	1472.68	0.002	0	4.7e-07
	VEIIANDQGNR			80.56	4	614.814	1227.61	2	1227.62	-0.007	0	2.9e-07
	FEELNMDLFR	Oxidation (M)	0.0000040000.0	80.3	1	665.298	1328.58	2	1328.61	-0.026	0	2.3e-07
	VQQLLQDFFNGKELCK			79.04	1	656.665	1966.97	3	1966	0.975	1	9.1e-08
	MDKSTVHDVVLVGGSTR	Oxidation (M)	0.40000000000000000.0	78.93	1	606.304	1815.89	3	1815.91	-0.025	1	7.5e-08
	ARFEELNMDLFR	Oxidation (M)	0.000000040000.0	77.14	1	778.879	1555.74	2	1555.74	-0.001	1	1.4e-07
	NAVVTVPAYFNDSQR			73.51	4	840.919	1679.82	2	1679.83	-0.004	0	1.3e-07
	MVNHFVQEFKR	Oxidation (M)	0.40000000000.0	72.74	1	363.437	1449.72	4	1449.72	-0.002	1	5.7e-07
	MVNHFVQEFKR	Oxidation (M)	0.40000000000.0	71.76	1	484.245	1449.71	3	1449.72	-0.006	1	3.6e-05
	ELESICNPIIAK			69.27	2	693.865	1385.72	2	1385.72	-0.007	0	7.4e-06
	VQQLLQDFFNGK			68.14	9	718.878	1435.74	2	1435.75	-0.005	0	2.6e-05
	FSDSSVQSDMK	Oxidation (M)	0.00000000040.0	67.79	2	623.763	1245.51	2	1245.52	-0.007	0	4.4e-07
	NALENYAYNMR			63.11	2	679.814	1357.61	2	1357.61	0.005	0	1.4e-05
	NQVAMNPVNTVFDAK			62.66	2	824.408	1646.8	2	1646.81	-0.007	0	1.3e-06
	MVNHFVQEFK	Oxidation (M)	0.4000000000.0	60.1	3	432.212	1293.62	3	1293.62	-0.002	0	4.1e-05
	VQDLLLLDVTPLSLGLETAGGVMTTLIPR			58.33	1	759.692	3034.74	4	3034.7	0.041	0	3.4e-06
	STVHDVVLVGGSTR			56.37	2	476.258	1425.75	3	1425.76	-0.006	0	1.9e-05
	NALENYAYNMR	Oxidation (M)	0.00000000040.0	56.12	2	687.808	1373.6	2	1373.6	-0.003	0	0.00019
	EIAEAYLGVTIK			56.07	3	653.864	1305.71	2	1305.72	-0.005	0	0.00031
	DAGVIAGLNVMR	Oxidation (M)	0.000000000040.0	55.21	1	616.324	1230.63	2	1230.64	-0.006	0	0.00036
	ARFEELNMDLFR			53.35	2	514.255	1539.74	3	1539.75	-0.006	1	0.001
	MKELESICNPIIAK			50.37	1	549.29	1644.85	3	1644.86	-0.009	1	2.7e-05
	RFSDSSVQSDMK	Oxidation (M)	0.000000000040.0	50.07	1	468.215	1401.62	3	1401.62	0.005	1	0.00021
	ARFEELNMDLFRK	Oxidation (M)	0.0000000400000.0	45.8	1	421.963	1683.83	4	1683.84	-0.016	2	0.00052
	DAGVIAGLNVMR			45.69	3	608.326	1214.64	2	1214.64	-0.007	0	0.00076
	STVHDVVLVGGSTR			45.33	1	713.886	1425.76	2	1425.76	-0.001	0	0.00075
	DNNLLGK			44.12	1	387.211	772.407	2	772.408	-0.001	0	0.002
	IGEKLPAADKK			42.03	1	585.345	1168.67	2	1168.68	-0.006	2	0.0033
	ARFEELNMDLFR	Oxidation (M)	0.000000040000.0	41.72	1	519.586	1555.74	3	1555.74	-0.009	1	0.0026
	NAVVTVPAYFNDSQR			41.09	2	561.28	1680.82	3	1679.83	0.993	0	0.00014
	EFAAEEISSMVLIK	Oxidation (M)	0.00000000040000.0	41.08	1	528.267	1581.78	3	1581.8	-0.015	0	0.018
	VQQLLQDFFNGK			38.75	2	479.587	1435.74	3	1435.75	-0.006	0	0.00023
	IPKVQQLLQDFFNGK			35.55	1	592.326	1773.95	3	1773.98	-0.023	1	0.038
	MVNHFVQEFK	Oxidation (M)	0.4000000000.0	30.93	1	647.822	1293.63	2	1293.62	0.013	0	0.0019
	GEEKEFAAEEISSMVLIK	Oxidation (M)	0.000000000000040000.0	29.68	1	676.344	2026.01	3	2025	1.013	1	0.003
	EFAAEEISSMVLIK			26.65	1	522.95	1565.83	3	1565.8	0.028	0	0.5
AT3G08530.1	44				52
	VPGNENPSILISFASK			116.87	1	836.94	1671.87	2	1671.88	-0.017	0	2.8e-11
	EGLVSDAIESFIR			106.13	3	718.37	1434.72	2	1434.73	-0.011	0	7.2e-09
	QLIDQVVSTALPESK			98.57	1	814.947	1627.88	2	1626.88	0.996	0	2.8e-09
	FQSVPVQAGQTPPLLQYFGTLLTR			90.16	1	888.145	2661.41	3	2660.43	0.981	0	4e-09
	TANLANNQIINYK			84.94	2	738.886	1475.76	2	1475.77	-0.016	0	2.1e-08
	GQCDEELINVTNK			84.52	1	760.363	1518.71	2	1518.7	0.013	0	3.1e-08
	QVGYTPDYLFLLQTILR			82.08	1	680.725	2039.15	3	2039.11	0.045	0	2.5e-08
	AQVPGTTQDHLQIFNIEAK			82.03	1	704.04	2109.1	3	2109.09	0.014	0	2e-08
	FNLNVQAVNVLLDNVR			81.46	2	610.006	1827	3	1827	-0.004	0	4e-08
	SLLPVEPLVEECEKR			80.1	1	599.993	1796.96	3	1796.93	0.023	1	3.1e-08
	ADDATHFLEVIR			75.84	1	462.904	1385.69	3	1385.69	-0.004	0	5.7e-07
	RGNLPGAENLVVQR			75.48	1	508.286	1521.84	3	1521.84	-0.001	1	1.5e-06
	VDSELIYAYAK			74.74	1	636.325	1270.63	2	1270.64	-0.01	0	1.3e-06
	SQALEAHAASFAQFK			73.18	1	535.939	1604.8	3	1604.8	0.001	0	1.4e-07
	VNPGNAPLVVGQLLDDECPEDFIK			71.59	1	880.437	2638.29	3	2638.3	-0.005	0	1.9e-07
	VEEDSVWSQVAK			68.83	1	688.84	1375.66	2	1375.66	0.003	0	6.5e-07
	FQSVPVQAGQTPPLLQYFGTLLTR			68.59	1	666.111	2660.41	4	2660.43	-0.02	0	4.2e-07
	LQQFQGAVDAAR			63.32	1	652.339	1302.66	2	1302.67	-0.005	0	9.9e-06
	SFNAGQITSK			60.82	2	526.774	1051.53	2	1051.53	0.004	0	4e-05
	YKEAAELAAESPQGILR			60.69	1	615.99	1844.95	3	1844.96	-0.016	1	2.8e-06
	AGLYIQSLK			58.15	1	496.789	991.564	2	991.57	-0.006	0	0.00028
	EVCFACVDAEEFR			57.73	1	816.357	1630.7	2	1630.68	0.023	0	4.2e-06
	LPDARPLINVCDR			57.73	1	513.604	1537.79	3	1537.8	-0.013	1	1.1e-05
	AHMGIFTELGVLYAR	Oxidation (M)	0.004000000000000.0	56.09	2	565.294	1692.86	3	1692.87	-0.006	0	1e-05
	VANVELYYK			55.43	1	549.791	1097.57	2	1097.58	-0.008	0	4.8e-05
	VVAAFAER			53.91	1	431.743	861.471	2	861.471	0.001	0	0.00037
	FQELFAQTK			52.28	2	556.288	1110.56	2	1110.57	-0.009	0	0.00063
	LYDEALYEAAK			50.7	1	643.321	1284.63	2	1284.62	0.005	0	3e-05
	RDPTLAVVAYR			50.57	1	630.847	1259.68	2	1259.7	-0.02	1	0.0007
	IIIDSNNNPEHFLTTNPYYDSK			48.67	1	865.737	2594.19	3	2594.23	-0.039	0	2.7e-05
	LNSYESLELSR			48.12	1	655.824	1309.63	2	1309.65	-0.019	0	4.4e-05
	ESNFYDAEK			47.83	1	551.735	1101.46	2	1101.46	-0.006	0	0.00024
	LAVTLVK			46.55	1	372.252	742.49	2	742.495	-0.005	0	0.0025
	FNLIYVITK			46.35	2	555.83	1109.65	2	1109.65	-0.002	0	0.0024
	VAAYIYK			45.38	1	414.236	826.457	2	826.459	-0.002	0	0.0027
	EATSFLLDVLKPNLPEHAFLQTK			44.92	1	653.61	2610.41	4	2610.41	0.007	1	6.1e-05
	VMDYINR	Oxidation (M)	0.0400000.0	37.9	1	463.731	925.447	2	925.433	0.014	0	0.026
	IVLQNSAFSGNFNLQNLLILTAIK			37.78	1	878.158	2631.45	3	2630.48	0.972	0	0.00029
	RGQCDEELINVTNK			35.54	1	838.409	1674.8	2	1674.8	0.005	1	0.0015
	YIEGYVQK			34.73	1	500.26	998.506	2	998.507	-0.001	0	0.0037
	GKLNSYESLELSR			31.47	1	499.257	1494.75	3	1494.77	-0.02	1	0.16
	AAANAPITMK	Acetyl (Protein N-term); Oxidation (M)	1.0000000040.0	27.59	1	523.773	1045.53	2	1044.53	1.004	0	0.031
	DLLLVNLR			27.47	1	478.297	954.58	2	954.586	-0.006	0	0.05
	QLIDQVVSTALPESK	Gln->pyro-Glu (N-term Q)	2.000000000000000.0	26.92	1	805.929	1609.84	2	1609.86	-0.014	0	0.003
AT3G09440.1	42				90
	IINEPTAAAIAYGLDKK			127.26	10	596.667	1786.98	3	1786.98	-0.004	1	3.2e-12
	ATAGDTHLGGEDFDNR			119.17	4	559.248	1674.72	3	1674.72	-0.001	0	6.7e-12
	GEGPAIGIDLGTTYSCVGVWQHDR			116.76	1	863.413	2587.22	3	2587.21	0.006	0	1.1e-11
	ATAGDTHLGGEDFDNR			116.41	1	838.37	1674.72	2	1674.72	0.001	0	3.2e-11
	SINPDEAVAYGAAVQAAILSGEGNEK			115.45	2	858.759	2573.25	3	2573.26	-0.007	0	1.5e-11
	EQVFSTYSDNQPGVLIQVYEGER			100.72	1	886.759	2657.25	3	2657.26	-0.007	0	3.6e-10
	IINEPTAAAIAYGLDKK			96.88	1	894.496	1786.98	2	1786.98	-0.005	1	1.4e-09
	IINEPTAAAIAYGLDK			96.48	2	830.446	1658.88	2	1658.89	-0.011	0	1.7e-09
	NQVAMNPINTVFDAKR	Oxidation (M)	0.0000400000000000.0	95.88	1	612.3	1833.88	3	1832.92	0.958	1	1e-09
	TLSSTAQTTIEIDSLFDGIDFYAPITR			93.91	2	992.498	2974.47	3	2974.48	-0.01	0	4.2e-09
	NQVAMNPINTVFDAK	Oxidation (M)	0.000040000000000.0	90.51	2	839.415	1676.82	2	1676.82	-0.004	0	7.3e-09
	NSIDDVVLVGGSTR			83.51	2	716.372	1430.73	2	1430.74	-0.006	0	1.1e-06
	TTPSYVAFTDSER			82.06	5	737.348	1472.68	2	1472.68	0.002	0	4.7e-07
	VEIIANDQGNR			80.56	4	614.814	1227.61	2	1227.62	-0.007	0	2.9e-07
	FEELNIDLFR			77.5	2	648.838	1295.66	2	1294.66	1.005	0	4.1e-06
	ARFEELNIDLFRK			77.44	1	550.966	1649.88	3	1649.89	-0.012	2	3.8e-07
	SGPAEKPMIVVNYK	Oxidation (M)	0.00000004000000.0	76.89	1	774.897	1547.78	2	1547.8	-0.022	1	2.3e-07
	FTDSSVQSDIKLWPFTLK			75.65	1	704.702	2111.08	3	2111.09	-0.011	1	8.1e-08
	NAVVTVPAYFNDSQR			73.51	4	840.919	1679.82	2	1679.83	-0.004	0	1.3e-07
	MVNHFVQEFKR	Oxidation (M)	0.40000000000.0	72.74	1	363.437	1449.72	4	1449.72	-0.002	1	5.7e-07
	MVNHFVQEFKR	Oxidation (M)	0.40000000000.0	71.76	1	484.245	1449.71	3	1449.72	-0.006	1	3.6e-05
	ELESICNPIIAK			69.27	2	693.865	1385.72	2	1385.72	-0.007	0	7.4e-06
	MREIAEAYLGTTIK			65.92	1	798.426	1594.84	2	1594.84	-0.001	1	2e-06
	VQQLLVDFFNGK			65.74	5	704.872	1407.73	2	1406.76	0.974	0	1.9e-06
	FTDSSVQSDIK			65.68	2	613.798	1225.58	2	1225.58	-0.001	0	4.1e-06
	NALENYAYNMR			63.11	2	679.814	1357.61	2	1357.61	0.005	0	1.4e-05
	RFTDSSVQSDIK			60.96	1	691.846	1381.68	2	1381.68	-0.006	1	0.00018
	MVNHFVQEFK	Oxidation (M)	0.4000000000.0	60.1	3	432.212	1293.62	3	1293.62	-0.002	0	4.1e-05
	FEELNIDLFRK			59.04	1	475.255	1422.74	3	1422.75	-0.006	1	0.00018
	EIAEAYLGTTIK			58.7	3	655.364	1308.71	2	1307.7	1.017	0	2.1e-05
	NALENYAYNMR	Oxidation (M)	0.00000000040.0	56.12	2	687.808	1373.6	2	1373.6	-0.003	0	0.00019
	DAGVIAGLNVMR	Oxidation (M)	0.000000000040.0	55.21	1	616.324	1230.63	2	1230.64	-0.006	0	0.00036
	ARFEELNIDLFR			54.92	3	508.27	1521.79	3	1521.79	-0.007	1	7.1e-05
	NQVAMNPINTVFDAK			51.35	1	831.916	1661.82	2	1660.82	0.993	0	1.5e-05
	MKELESICNPIIAK			50.37	1	549.29	1644.85	3	1644.86	-0.009	1	2.7e-05
	DAGVIAGLNVMR			45.69	3	608.326	1214.64	2	1214.64	-0.007	0	0.00076
	DNNLLGK			44.12	1	387.211	772.407	2	772.408	-0.001	0	0.002
	EIAEAYLGTTIK			41.56	1	436.909	1307.7	3	1307.7	0.008	0	0.0017
	NAVVTVPAYFNDSQR			41.09	2	561.28	1680.82	3	1679.83	0.993	0	0.00014
	MDKNSIDDVVLVGGSTR	Oxidation (M)	0.40000000000000000.0	39.73	1	607.975	1820.9	3	1820.89	0.009	1	0.00095
	MVNHFVQEFK	Oxidation (M)	0.4000000000.0	30.93	1	647.822	1293.63	2	1293.62	0.013	0	0.0019
	LWPFTLK			28.76	4	452.766	903.517	2	903.522	-0.004	0	0.026
AT5G50920.1	41				49
	LIGSPPGYVGYTEGGQLTEAVR			122.15	1	755.384	2263.13	3	2263.15	-0.017	0	7e-12
	RPYTVVLFDEIEK			95.74	1	804.928	1607.84	2	1607.86	-0.015	1	1e-07
	LGHNFVGTEQILLGLIGEGTGIAAK			93.52	1	628.096	2508.35	4	2507.38	0.979	0	2.3e-09
	EIADILLKEVFER			93.29	1	525.63	1573.87	3	1573.87	-0.004	1	9.2e-08
	YTDESLVAAAQLSYQYISDR			91.87	1	765.032	2292.07	3	2292.09	-0.017	0	2.5e-09
	VITLDMGLLVAGTK	Oxidation (M)	0.00000400000000.0	89.73	1	724.429	1446.84	2	1445.82	1.028	0	8.8e-09
	LAEEGKLDPVVGR			86.55	2	691.883	1381.75	2	1381.76	-0.005	1	9.6e-08
	VVDEGYNPSYGAR			84.5	1	713.828	1425.64	2	1425.65	-0.012	0	2.9e-08
	GELQCIGATTLDEYRK			83.73	1	927.459	1852.9	2	1852.9	0.005	1	1.4e-08
	MPTLEEYGTNLTK	Oxidation (M)	0.4000000000000.0	83.19	1	756.86	1511.7	2	1511.72	-0.013	0	7.9e-08
	NTLLIMTSNVGSSVIEK	Oxidation (M)	0.00000400000000000.0	83.1	1	911.47	1820.93	2	1820.95	-0.029	0	6.6e-08
	IASGDVPETIEGK			78.47	1	658.34	1314.66	2	1314.67	-0.002	0	2e-06
	NPNRPIASFIFSGPTGVGK			76.78	1	980.017	1958.02	2	1958.04	-0.019	1	6.3e-08
	TAIAEGLAQR			74.55	2	515.285	1028.56	2	1028.56	-0.006	0	6.8e-06
	VLENLGADPSNIR			69.98	1	699.366	1396.72	2	1396.73	-0.013	0	4.1e-06
	FQPVKVPEPTVDETIQILK			69.41	1	727.746	2180.22	3	2180.21	0.007	1	6.9e-07
	TKNNPCLIGEPGVGK			66.22	1	792.4	1582.79	2	1582.81	-0.028	1	1.6e-05
	VLELSLEEAR			65.99	2	579.816	1157.62	2	1157.63	-0.012	0	1.3e-05
	AIDLIDEAGSR			62.31	1	580.299	1158.58	2	1158.59	-0.005	0	0.00014
	LDEMIVFR	Oxidation (M)	0.00040000.0	60.59	1	520.272	1038.53	2	1037.52	1.009	0	7.4e-05
	GSGFVAVEIPFTPR			60	2	738.893	1475.77	2	1475.78	-0.005	0	3.7e-06
	IASGDVPETIEGKK			58.32	1	481.925	1442.75	3	1442.76	-0.01	1	7.3e-06
	LLKMEETLHKR	Oxidation (M)	0.00040000000.0	55.31	1	354.2	1412.77	4	1412.78	-0.008	2	1.4e-05
	EIADILLK			53.77	2	457.779	913.543	2	913.548	-0.006	0	0.00067
	HIEKDPALER			51.61	2	403.218	1206.63	3	1206.64	-0.003	1	6.6e-05
	IIGQDEAVK			47.91	1	486.769	971.523	2	971.529	-0.006	0	0.002
	LLEDSMAEK	Oxidation (M)	0.000004000.0	43.94	2	526.251	1050.49	2	1050.49	-0.003	0	0.00012
	VVQILGR			43.58	2	392.753	783.491	2	783.497	-0.006	0	0.0011
	SLVTEELK			41.65	1	459.759	917.503	2	917.507	-0.004	0	0.022
	VSTDESDRLLK			40.06	1	631.828	1261.64	2	1261.65	-0.009	1	0.0041
	LDPVVGR			38.11	1	378.22	754.426	2	754.434	-0.008	0	0.018
	QYFRPEFLNR			36.83	1	457.237	1368.69	3	1368.69	-0.005	1	0.00079
	IGFDLDYDEKDSSYNR			36.64	1	646.306	1935.9	3	1935.85	0.047	1	0.00037
	EIELQVTER			35.9	1	558.793	1115.57	2	1115.58	-0.01	0	0.0063
	IASGDVPETIEGK			32.6	1	439.231	1314.67	3	1314.67	0.006	0	0.0087
	SMGINLK	Oxidation (M)	0.0400000.0	32.49	1	389.709	777.404	2	777.405	-0.001	0	0.087
	SLVTEELKQYFRPEFLNR			32.3	1	568.067	2268.24	4	2268.19	0.05	2	0.0022
	RVLELSLEEAR			32.04	1	438.917	1313.73	3	1313.73	-0.002	1	0.14
	DREIELR			31.63	1	465.749	929.483	2	929.493	-0.01	1	0.15
	ALAAYYFGSEEAMIR	Oxidation (M)	0.000000000000400.0	31.5	1	854.399	1706.78	2	1706.8	-0.013	0	0.0048
	QYFRPEFLNR	Gln->pyro-Glu (N-term Q)	2.0000000000.0	27.84	1	676.842	1351.67	2	1351.67	0.003	1	0.0081
AT5G56000.1	41				79
	KPEEINKEEYAAFYK			122.42	2	620.309	1857.9	3	1857.91	-0.01	2	2.6e-11
	KPEEINKEEYAAFYK			111.22	1	930.471	1858.93	2	1857.91	1.012	2	1.8e-09
	TMEINPENSIMDELRK	2 Oxidation (M)	0.0400000000400000.0	110.01	2	651.311	1950.91	3	1950.9	0.01	1	2e-10
	HNDDEQYVWESQAGGSFTVTR			102.28	5	809.694	2426.06	3	2425.06	1.002	0	2.6e-10
	ELISNSSDALDK			100.81	4	646.32	1290.63	2	1290.63	-0.004	0	2.2e-08
	ELISNSSDALDKIR	Glu->pyro-Glu (N-term E)	3.00000000000000.0	98.72	1	771.906	1541.8	2	1541.81	-0.008	1	1.6e-09
	ELISNSSDALDKIR			95.05	5	520.944	1559.81	3	1559.82	-0.005	1	8.5e-08
	GIVDSEDLPLNISR			94.59	4	764.402	1526.79	2	1526.79	-0.005	0	5.3e-09
	KAVENSPFLEK			93.21	1	631.342	1260.67	2	1260.67	-0.001	1	1.2e-07
	TMEINPENSIMDELR	2 Oxidation (M)	0.040000000040000.0	90.67	1	912.904	1823.79	2	1822.81	0.986	0	2.6e-08
	SLSNDWEEHLAVK			90.51	1	764.375	1526.74	2	1526.74	-0.001	0	1.8e-07
	VIKDVLGDKVEK			88.54	2	448.269	1341.79	3	1341.79	-0.002	2	1.8e-07
	SGDELTSLKDYVTR			87.82	2	792.397	1582.78	2	1582.78	-0.004	1	2.9e-08
	SGDELTSLKDYVTR			85.46	2	528.601	1582.78	3	1582.78	-0.003	1	9.7e-09
	LDGQPELFIHIIPDK			82.23	2	578.984	1733.93	3	1733.93	-0.004	0	6e-08
	SLSNDWEEHLAVK			81.56	1	509.917	1526.73	3	1526.74	-0.006	0	1.4e-06
	ADLVNNLGTIAR			80.28	3	628.848	1255.68	2	1255.69	-0.007	0	1.9e-06
	AVENSPFLEK			78.51	3	567.294	1132.57	2	1132.58	-0.003	0	1.4e-06
	HFSVEGQLEFK			74.31	5	660.829	1319.64	2	1319.65	-0.008	0	9.5e-06
	KPEEINKEEYAAFYK			70.02	1	465.486	1857.91	4	1857.91	0	2	5.1e-07
	LGIHEDSQNR			69.28	2	390.194	1167.56	3	1167.56	-0.003	0	2.8e-06
	KHSEFISYPISLWIEK			61.72	1	659.682	1976.02	3	1976.04	-0.016	1	1.2e-05
	HSEFISYPISLWIEK			61.04	2	616.987	1847.94	3	1847.95	-0.006	0	2e-06
	APFDLFDTK			60.65	2	527.264	1052.51	2	1052.52	-0.005	0	2.3e-05
	SGDELTSLK			59.56	1	475.247	948.479	2	948.476	0.002	0	7.9e-05
	EDQMEYIEER	Oxidation (M)	0.0004000000.0	59.29	2	679.281	1356.55	2	1356.55	-0.002	0	1.9e-05
	VIKDVLGDK			55.77	1	493.79	985.565	2	985.581	-0.016	1	0.00028
	RAPFDLFDTK			53.31	2	605.314	1208.61	2	1208.62	-0.006	1	0.00062
	AILFVPK			49.33	3	394.256	786.497	2	786.5	-0.004	0	0.0024
	ELISNSSDALDKIR	Glu->pyro-Glu (N-term E)	3.00000000000000.0	49.16	1	514.944	1541.81	3	1541.81	0.004	1	3.2e-05
	KAVENSPFLEK			48.4	1	421.232	1260.67	3	1260.67	0.003	1	0.0013
	SKLDGQPELFIHIIPDK			48.11	1	651.024	1950.05	3	1949.06	0.988	1	3.1e-05
	EKFEGLCK			45.06	1	505.749	1009.48	2	1009.49	-0.007	1	0.0044
	HFSVEGQLEFK			44.84	2	440.89	1319.65	3	1319.65	-0.004	0	0.00069
	FESLTDK			43.82	2	420.21	838.406	2	838.407	-0.001	0	0.0066
	KTMEINPENSIMDELR	2 Oxidation (M)	0.0040000000040000.0	43.01	1	651.305	1950.89	3	1950.9	-0.009	1	0.00011
	APFDLFDTKK			39.52	1	591.31	1180.61	2	1180.61	-0.007	1	0.00037
	FYEAFSK			34.09	2	446.215	890.415	2	890.417	-0.003	0	0.006
	KHSEFISYPISLWIEK			33.69	1	495.015	1976.03	4	1976.04	-0.008	1	0.0029
	SKLDGQPELFIHIIPDK			33.47	1	488.27	1949.05	4	1949.06	-0.011	1	0.00073
	DVLGDKVEK			32.2	1	501.772	1001.53	2	1001.54	-0.009	1	0.046
AT3G11130.1	40				48
	VPGNENPSILISFASK			116.87	1	836.94	1671.87	2	1671.88	-0.017	0	2.8e-11
	EGLVSDAIESFIR			106.13	3	718.37	1434.72	2	1434.73	-0.011	0	7.2e-09
	ASEDTNVYDDLVR			105.88	1	748.84	1495.66	2	1495.68	-0.014	0	1.6e-10
	QLIDQVVSTALPESK			98.57	1	814.947	1627.88	2	1626.88	0.996	0	2.8e-09
	FQSVPVQAGQTPPLLQYFGTLLTR			90.16	1	888.145	2661.41	3	2660.43	0.981	0	4e-09
	TANLANNQIINYK			84.94	2	738.886	1475.76	2	1475.77	-0.016	0	2.1e-08
	GQCDEELINVTNK			84.52	1	760.363	1518.71	2	1518.7	0.013	0	3.1e-08
	AQVPGTTQDHLQIFNIEAK			82.03	1	704.04	2109.1	3	2109.09	0.014	0	2e-08
	FNLNVQAVNVLLDNVR			81.46	2	610.006	1827	3	1827	-0.004	0	4e-08
	RGNLPGAENLVVQR			75.48	1	508.286	1521.84	3	1521.84	-0.001	1	1.5e-06
	VDSELIYAYAK			74.74	1	636.325	1270.63	2	1270.64	-0.01	0	1.3e-06
	SQALEAHAASFAQFK			73.18	1	535.939	1604.8	3	1604.8	0.001	0	1.4e-07
	VNPGNAPLVVGQLLDDECPEDFIK			71.59	1	880.437	2638.29	3	2638.3	-0.005	0	1.9e-07
	FQSVPVQAGQTPPLLQYFGTLLTR			68.59	1	666.111	2660.41	4	2660.43	-0.02	0	4.2e-07
	LQQFQGAVDAAR			63.32	1	652.339	1302.66	2	1302.67	-0.005	0	9.9e-06
	SFNAGQITSK			60.82	2	526.774	1051.53	2	1051.53	0.004	0	4e-05
	YKEAAELAAESPQGILR			60.69	1	615.99	1844.95	3	1844.96	-0.016	1	2.8e-06
	AGLYIQSLK			58.15	1	496.789	991.564	2	991.57	-0.006	0	0.00028
	EVCFACVDAEEFR			57.73	1	816.357	1630.7	2	1630.68	0.023	0	4.2e-06
	LPDARPLINVCDR			57.73	1	513.604	1537.79	3	1537.8	-0.013	1	1.1e-05
	AHMGIFTELGVLYAR	Oxidation (M)	0.004000000000000.0	56.09	2	565.294	1692.86	3	1692.87	-0.006	0	1e-05
	VANVELYYK			55.43	1	549.791	1097.57	2	1097.58	-0.008	0	4.8e-05
	VVAAFAER			53.91	1	431.743	861.471	2	861.471	0.001	0	0.00037
	FQELFAQTK			52.28	2	556.288	1110.56	2	1110.57	-0.009	0	0.00063
	LYDEALYEAAK			50.7	1	643.321	1284.63	2	1284.62	0.005	0	3e-05
	RDPTLAVVAYR			50.57	1	630.847	1259.68	2	1259.7	-0.02	1	0.0007
	IIIDSNNNPEHFLTTNPYYDSK			48.67	1	865.737	2594.19	3	2594.23	-0.039	0	2.7e-05
	LNSYESLELSR			48.12	1	655.824	1309.63	2	1309.65	-0.019	0	4.4e-05
	ESNFYDAEK			47.83	1	551.735	1101.46	2	1101.46	-0.006	0	0.00024
	LAVTLVK			46.55	1	372.252	742.49	2	742.495	-0.005	0	0.0025
	FNLIYVITK			46.35	2	555.83	1109.65	2	1109.65	-0.002	0	0.0024
	VAAYIYK			45.38	1	414.236	826.457	2	826.459	-0.002	0	0.0027
	IIYAFISNWAK			42.32	1	663.361	1324.71	2	1324.72	-0.01	0	0.00011
	VMDYINR	Oxidation (M)	0.0400000.0	37.9	1	463.731	925.447	2	925.433	0.014	0	0.026
	IVLQNSAFSGNFNLQNLLILTAIK			37.78	1	878.158	2631.45	3	2630.48	0.972	0	0.00029
	RGQCDEELINVTNK			35.54	1	838.409	1674.8	2	1674.8	0.005	1	0.0015
	YIEGYVQK			34.73	1	500.26	998.506	2	998.507	-0.001	0	0.0037
	GKLNSYESLELSR			31.47	1	499.257	1494.75	3	1494.77	-0.02	1	0.16
	DLLLVNLR			27.47	1	478.297	954.58	2	954.586	-0.006	0	0.05
	QLIDQVVSTALPESK	Gln->pyro-Glu (N-term Q)	2.000000000000000.0	26.92	1	805.929	1609.84	2	1609.86	-0.014	0	0.003
AT1G13440.1	39				97
	FGIVEGLMTTVHSITATQK	Oxidation (M)	0.0000000400000000000.0	125.81	2	683.692	2048.05	3	2048.06	-0.006	0	1.6e-12
	FGIVEGLMTTVHSITATQK			122.98	5	678.361	2032.06	3	2032.07	-0.004	0	1.7e-11
	TLLFGEKPVTVFGIR			116.64	21	559.661	1675.96	3	1675.97	-0.006	1	2.7e-11
	VPTVDVSVVDLTVR			113.82	7	749.923	1497.83	2	1497.84	-0.008	0	4.4e-11
	NPEDIPWGEAGADFVVESTGVFTDKDK			111.97	2	975.119	2922.34	3	2922.36	-0.02	1	3.2e-11
	GILGYTEDDVVSTDFVGDNR			105.33	5	724.672	2170.99	3	2171	-0.008	0	1.3e-10
	SDLDIVSNASCTTNCLAPLAK			104.48	1	1125.54	2249.06	2	2249.07	-0.011	0	2.8e-10
	VPTVDVSVVDLTVR			95.06	1	500.286	1497.84	3	1497.84	-0.004	0	2.1e-08
	LVSWYDNEWGYSSR			92.11	2	881.391	1760.77	2	1760.78	-0.012	0	2.3e-09
	DDKTLLFGEKPVTVFGIR			90.69	1	679.032	2034.07	3	2034.12	-0.041	2	3.1e-09
	MKGILGYTEDDVVSTDFVGDNR	Oxidation (M)	0.4000000000000000000000.0	81.85	1	816.732	2447.18	3	2446.13	1.042	1	4.5e-08
	VPTVDVSVVDLTVRLEK			81.45	2	623.69	1868.05	3	1868.06	-0.014	1	1.5e-07
	IRIGINGFGR			71.1	1	368.222	1101.64	3	1101.64	0.004	1	1.5e-06
	AGIALSDK			70.62	2	387.721	773.426	2	773.428	-0.002	0	2.7e-05
	KVVISAPSK			70.52	2	464.794	927.573	2	927.575	-0.003	1	1.2e-05
	DAPMFVVGVNEHEYK	Oxidation (M)	0.000400000000000.0	66.29	2	584.273	1749.8	3	1749.8	-0.005	0	6.1e-07
	SSIFDAK			64.38	3	384.203	766.392	2	766.386	0.006	0	0.00026
	TVDGPSMKDWR	Oxidation (M)	0.00000040000.0	63.31	1	654.812	1307.61	2	1306.6	1.011	1	1.2e-06
	VVDLIVHMSK	Oxidation (M)	0.0000000400.0	61.6	1	578.821	1155.63	2	1155.63	-0.005	0	9.9e-06
	VVDLIVHMSK			60.27	2	380.886	1139.63	3	1139.64	-0.002	0	1.3e-05
	AASFNIIPSSTGAAK			58.62	4	717.88	1433.74	2	1433.75	-0.006	0	2.6e-05
	TLLFGEKPVTVFGIR			57.43	2	838.989	1675.96	2	1675.97	-0.003	1	1.4e-05
	IGINGFGR			55.65	6	417.234	832.453	2	832.456	-0.003	0	0.00082
	DDVELVAVNDPFITTEYMTYMFK	2 Oxidation (M)	0.00000000000000000400400.0	53	1	925.098	2772.27	3	2772.26	0.017	0	1.1e-05
	AGIALSDKFVK			52.31	1	383.558	1147.65	3	1147.66	-0.007	1	0.00013
	PVTVFGIR			52.11	1	444.768	887.522	2	887.523	-0.001	0	5.5e-05
	TLLFGEKPVTVFGIR			51.52	1	419.992	1675.94	4	1675.97	-0.028	1	0.00017
	VLPSLNGK			51.35	4	414.252	826.49	2	826.491	-0.001	0	0.00041
	VVDLIVHMSK			48.67	1	570.822	1139.63	2	1139.64	-0.008	0	0.00021
	YDSVHGQWK			48.33	1	373.849	1118.53	3	1118.52	0.011	0	3.4e-05
	FGIVEGLMTTVHSITATQK			44.75	1	509.021	2032.06	4	2032.07	-0.01	0	6.4e-05
	LVSWYDNEWGYSSR			44.31	1	587.934	1760.78	3	1760.78	0.002	0	7e-05
	VVDLIVHMSK	Oxidation (M)	0.0000000400.0	42.42	1	386.219	1155.63	3	1155.63	0.002	0	0.00034
	VINDRFGIVEGLMTTVHSITATQK	Oxidation (M)	0.000000000000400000000000.0	42.31	1	662.351	2645.38	4	2645.39	-0.008	1	0.00011
	LTGMSFR	Oxidation (M)	0.0004000.0	41.37	1	414.207	826.399	2	826.401	-0.001	0	0.0041
	TLLFGEK			34.69	2	404.233	806.452	2	806.454	-0.002	0	0.033
	VVISAPSK			34.52	2	400.746	799.478	2	799.48	-0.003	0	0.016
	VVDLIVHMSKA	Oxidation (M)	0.00000004000.0	29.25	1	410.231	1227.67	3	1226.67	1.001	1	0.013
	FGIVEGLMTTVHSITATQK	Oxidation (M)	0.0000000400000000000.0	27.41	1	513.274	2049.07	4	2048.06	1.006	0	0.0027
ATCG00490.1	38				77
	ESTLGFVDLLRDDYVEKDR			113.16	2	568.286	2269.11	4	2269.12	-0.008	2	7.8e-11
	LEGDRESTLGFVDLLR			105.15	4	607.322	1818.94	3	1818.95	-0.005	1	2.4e-10
	NEGRDLAVEGNEIIR			95.37	1	562.284	1683.83	3	1683.85	-0.023	1	6.7e-08
	TFQGPPHGIQVER			95.03	5	489.255	1464.74	3	1464.75	-0.004	0	8.5e-08
	GGLDFTKDDENVNSQPFMR	Oxidation (M)	0.0000000000000000040.0	91.83	1	1093.49	2184.96	2	2184.97	-0.018	1	2.5e-09
	ESTLGFVDLLR			86.94	3	625.34	1248.66	2	1248.67	-0.007	0	4.6e-07
	LTYYTPEYETKDTDILAAFR			85.6	1	804.399	2410.18	3	2409.17	1.001	1	9.4e-09
	LSGGDHIHAGTVVGK			81.13	1	724.38	1446.74	2	1446.76	-0.013	0	1.3e-07
	DNGLLLHIHR			78.25	1	594.83	1187.64	2	1186.66	0.987	0	6.5e-07
	DLAVEGNEIIR			73.72	4	614.829	1227.64	2	1227.65	-0.003	0	1.8e-06
	GHYLNATAGTCEEMIKR	Oxidation (M)	0.00000000000004000.0	69.95	1	492.483	1965.9	4	1965.9	-0.001	1	2.8e-07
	LSGGDHIHAGTVVGK			66.21	1	362.697	1446.76	4	1446.76	-0.001	0	1.3e-06
	GGLDFTKDDENVNSQPFMR	Oxidation (M)	0.0000000000000000040.0	65.43	2	729.331	2184.97	3	2184.97	-0.002	1	9.9e-07
	WSPELAAACEVWK			65.11	2	773.863	1545.71	2	1545.73	-0.016	0	9.1e-07
	DNGLLLHIHR			65.07	1	396.558	1186.65	3	1186.66	-0.005	0	1.7e-05
	PLLGCTIKPK			64.81	3	376.225	1125.65	3	1125.66	-0.004	1	1.3e-05
	VALEACVQAR			58.18	2	558.793	1115.57	2	1115.58	-0.005	0	6e-05
	DDENVNSQPFMR	Oxidation (M)	0.000000000040.0	57.35	2	734.31	1466.61	2	1466.61	-0.004	0	8.7e-06
	ESTLGFVDLLRDDYVEKDR			56.89	1	757.379	2269.11	3	2269.12	-0.009	2	4.6e-06
	GGLDFTK			56.4	2	369.194	736.374	2	736.376	-0.002	0	0.00046
	ESTLGFVDLLR	Glu->pyro-Glu (N-term E)	3.00000000000.0	55.16	1	616.334	1230.65	2	1230.66	-0.008	0	0.00014
	DTDILAAFR			54.95	11	511.267	1020.52	2	1020.52	-0.004	0	0.00044
	ESTLGFVDLLRDDYVEKDR	Glu->pyro-Glu (N-term E)	3.0000000000000000000.0	51.95	1	751.695	2252.07	3	2251.11	0.952	2	1.7e-05
	YGRPLLGCTIK			50.94	1	426.572	1276.69	3	1276.7	-0.003	1	7.2e-05
	ALAALRLEDLR			49.57	1	414.248	1239.72	3	1239.73	-0.007	1	0.0011
	ESTLGFVDLLRDDYVEK			49.37	1	667.002	1997.98	3	1997.99	-0.011	1	2.5e-05
	FLFCAEAIYK			47.84	4	631.317	1260.62	2	1260.62	-0.003	0	8e-05
	PLLGCTIK			46.24	1	451.259	900.504	2	900.51	-0.006	0	0.0032
	LTYYTPEYETK			43.28	4	704.336	1406.66	2	1406.66	-0.003	0	0.00012
	IPPAYTK			41.95	2	395.227	788.44	2	788.443	-0.003	0	0.0032
	LTYYTPEYETKDTDILAAFR			39.11	1	603.297	2409.16	4	2409.17	-0.015	1	0.00021
	YGRPLLGCTIKPK			38.74	1	501.618	1501.83	3	1501.84	-0.011	2	0.00039
	AVYECLR			37.83	3	455.726	909.437	2	909.438	-0.001	0	0.0091
	EITFNFPTIDKLDGQE			36.21	1	622.973	1865.9	3	1865.9	-0.008	1	0.00066
	EITFNFPTIDKLDGQE			33.44	1	933.959	1865.9	2	1865.9	-0.001	1	0.0011
	GGLDFTKDDENVNSQPFMR			30.58	1	724.348	2170.02	3	2168.98	1.042	1	0.0014
	LEGDRESTLGFVDLLRDDYVEK			28.9	1	643.079	2568.29	4	2568.27	0.015	2	0.0019
	SQAETGEIK			27.16	1	481.74	961.466	2	961.472	-0.005	0	0.042
AT3G04120.1	37				92
	FGIVEGLMTTVHSITATQK	Oxidation (M)	0.0000000400000000000.0	125.81	2	683.692	2048.05	3	2048.06	-0.006	0	1.6e-12
	FGIVEGLMTTVHSITATQK			122.98	5	678.361	2032.06	3	2032.07	-0.004	0	1.7e-11
	TLLFGEKPVTVFGIR			116.64	21	559.661	1675.96	3	1675.97	-0.006	1	2.7e-11
	VPTVDVSVVDLTVR			113.82	7	749.923	1497.83	2	1497.84	-0.008	0	4.4e-11
	GILGYTEDDVVSTDFVGDNR			105.33	5	724.672	2170.99	3	2171	-0.008	0	1.3e-10
	SDLDIVSNASCTTNCLAPLAK			104.48	1	1125.54	2249.06	2	2249.07	-0.011	0	2.8e-10
	VPTVDVSVVDLTVR			95.06	1	500.286	1497.84	3	1497.84	-0.004	0	2.1e-08
	NPEDIPWAEAGADYVVESTGVFTDKDK			94.81	1	985.455	2953.34	3	2952.37	0.975	1	1.3e-09
	LVSWYDNEWGYSSR			92.11	2	881.391	1760.77	2	1760.78	-0.012	0	2.3e-09
	VPTVDVSVVDLTVRLEK			81.45	2	623.69	1868.05	3	1868.06	-0.014	1	1.5e-07
	IRIGINGFGR			71.1	1	368.222	1101.64	3	1101.64	0.004	1	1.5e-06
	AGIALSDK			70.62	2	387.721	773.426	2	773.428	-0.002	0	2.7e-05
	KVVISAPSK			70.52	2	464.794	927.573	2	927.575	-0.003	1	1.2e-05
	DAPMFVVGVNEHEYK	Oxidation (M)	0.000400000000000.0	66.29	2	584.273	1749.8	3	1749.8	-0.005	0	6.1e-07
	SSIFDAK			64.38	3	384.203	766.392	2	766.386	0.006	0	0.00026
	TVDGPSMKDWR	Oxidation (M)	0.00000040000.0	63.31	1	654.812	1307.61	2	1306.6	1.011	1	1.2e-06
	VVDLIVHMSK	Oxidation (M)	0.0000000400.0	61.6	1	578.821	1155.63	2	1155.63	-0.005	0	9.9e-06
	VVDLIVHMSK			60.27	2	380.886	1139.63	3	1139.64	-0.002	0	1.3e-05
	AASFNIIPSSTGAAK			58.62	4	717.88	1433.74	2	1433.75	-0.006	0	2.6e-05
	TLLFGEKPVTVFGIR			57.43	2	838.989	1675.96	2	1675.97	-0.003	1	1.4e-05
	IGINGFGR			55.65	6	417.234	832.453	2	832.456	-0.003	0	0.00082
	DDVELVAVNDPFITTEYMTYMFK	2 Oxidation (M)	0.00000000000000000400400.0	53	1	925.098	2772.27	3	2772.26	0.017	0	1.1e-05
	AGIALSDKFVK			52.31	1	383.558	1147.65	3	1147.66	-0.007	1	0.00013
	PVTVFGIR			52.11	1	444.768	887.522	2	887.523	-0.001	0	5.5e-05
	TLLFGEKPVTVFGIR			51.52	1	419.992	1675.94	4	1675.97	-0.028	1	0.00017
	VVDLIVHMSK			48.67	1	570.822	1139.63	2	1139.64	-0.008	0	0.00021
	YDSVHGQWK			48.33	1	373.849	1118.53	3	1118.52	0.011	0	3.4e-05
	FGIVEGLMTTVHSITATQK			44.75	1	509.021	2032.06	4	2032.07	-0.01	0	6.4e-05
	LVSWYDNEWGYSSR			44.31	1	587.934	1760.78	3	1760.78	0.002	0	7e-05
	VVDLIVHMSK	Oxidation (M)	0.0000000400.0	42.42	1	386.219	1155.63	3	1155.63	0.002	0	0.00034
	VINDRFGIVEGLMTTVHSITATQK	Oxidation (M)	0.000000000000400000000000.0	42.31	1	662.351	2645.38	4	2645.39	-0.008	1	0.00011
	LTGMSFR	Oxidation (M)	0.0004000.0	41.37	1	414.207	826.399	2	826.401	-0.001	0	0.0041
	VLPALNGK			35.89	2	406.255	810.495	2	810.496	-0.002	0	0.018
	TLLFGEK			34.69	2	404.233	806.452	2	806.454	-0.002	0	0.033
	VVISAPSK			34.52	2	400.746	799.478	2	799.48	-0.003	0	0.016
	VVDLIVHMSKA	Oxidation (M)	0.00000004000.0	29.25	1	410.231	1227.67	3	1226.67	1.001	1	0.013
	FGIVEGLMTTVHSITATQK	Oxidation (M)	0.0000000400000000000.0	27.41	1	513.274	2049.07	4	2048.06	1.006	0	0.0027
AT5G17920.1	36				52
	LNLPILPTTTIGSFPQTVELR			148.33	1	770.77	2309.29	3	2309.3	-0.011	0	1.2e-14
	ALAGQKDEALFSANAAALASR			120	1	692.365	2074.07	3	2074.08	-0.007	1	4.2e-11
	KLNLPILPTTTIGSFPQTVELR			117.63	1	813.466	2437.38	3	2437.39	-0.019	1	1.5e-11
	GMLTGPVTILNWSFVR	Oxidation (M)	0.0400000000000000.0	105.76	1	602.984	1805.93	3	1805.95	-0.019	0	5.1e-09
	YGAGIGPGVYDIHSPR			100.93	1	553.612	1657.82	3	1657.82	-0.006	0	3.4e-10
	ALGVDTVPVLVGPVSYLLLSK			98.73	1	535.818	2139.24	4	2139.26	-0.012	0	5.5e-10
	ALGVDTVPVLVGPVSYLLLSK			91.14	3	714.09	2139.25	3	2139.26	-0.006	0	2.8e-09
	IPSSEEIADR			85.26	1	558.777	1115.54	2	1115.55	-0.007	0	5.2e-07
	DEALFSANAAALASR			84.39	1	753.876	1505.74	2	1505.75	-0.011	0	6.8e-08
	HETCYQIALAIKDEVEDLEK			75.25	2	601.794	2403.14	4	2403.16	-0.018	1	1.3e-07
	LNLPILPTTTIGSFPQTVELR			74.88	1	578.328	2309.28	4	2309.3	-0.018	0	1e-07
	WFDTNYHYIVPELGPEVNFSYASHK			73.94	1	754.117	3012.44	4	3012.41	0.031	0	1.2e-07
	HETCYQIALAIKDEVEDLEK			73.08	1	802.383	2404.13	3	2403.16	0.966	1	1.1e-06
	IPSSEEIADRVNK			68.73	1	729.372	1456.73	2	1456.75	-0.023	1	7.2e-06
	GVTAFGFDLVR			66.32	4	591.316	1180.62	2	1180.62	-0.006	0	1.3e-05
	LVVSTSCSLLHTAVDLINETK			66.15	1	767.408	2299.2	3	2299.21	-0.008	0	2.3e-06
	FALESFWDGK			65.73	2	600.289	1198.56	2	1198.57	-0.002	0	9.1e-06
	YLFAGVVDGR			61.09	2	548.791	1095.57	2	1095.57	-0.003	0	2.1e-05
	KVSEEDYVK			60.93	1	549.275	1096.54	2	1095.55	0.991	1	0.00015
	GVDKSFELLSLLPK			60.68	2	515.968	1544.88	3	1544.88	0	1	0.00011
	SFELLSLLPK			59.5	7	573.84	1145.66	2	1145.67	-0.004	0	1.1e-05
	CVKPPVIYGDVSRPK			58.71	1	429.489	1713.93	4	1713.92	0.004	2	3.1e-06
	GGIGVIQIDEAALR			56.98	1	706.396	1410.78	2	1410.78	-0.005	0	4.6e-06
	ILPIYKEVITELK			54.73	1	520.648	1558.92	3	1557.94	0.984	1	1.5e-05
	SEHAFYLDWAVHSFR			52.36	1	466.969	1863.85	4	1863.87	-0.022	0	2e-05
	VVDLQEELDIDVLVHGEPER			52.2	1	769.077	2304.21	3	2303.16	1.046	0	1.3e-05
	VVEVNALAK			51.37	1	471.783	941.552	2	941.555	-0.003	0	0.00059
	ASHIVGYPR	Acetyl (Protein N-term)	1.000000000.0	50.86	2	521.276	1040.54	2	1040.54	-0.004	0	0.00016
	MLAVLEQNILWVNPDCGLK			49.76	1	738.374	2212.1	3	2212.14	-0.037	0	2.2e-05
	VSEEDYVK			48.72	1	484.735	967.456	2	967.45	0.006	0	0.0012
	YTEVKPALK			45.09	1	350.199	1047.58	3	1047.6	-0.021	1	0.0002
	EVITELK			40.8	1	416.24	830.466	2	830.475	-0.009	0	0.03
	GNASVPAMEMTK	2 Oxidation (M)	0.000000040400.0	37.57	1	634.781	1267.55	2	1266.56	0.989	0	0.00066
	KLNLPILPTTTIGSFPQTVELR			35	1	610.352	2437.38	4	2437.39	-0.015	1	0.00095
	LVVSTSCSLLHTAVDLINETK			30.15	1	575.807	2299.2	4	2299.21	-0.009	0	0.0015
	CVKPPVIYGDVSR			27.55	1	497.262	1488.76	3	1488.78	-0.012	1	0.3
AT3G12580.1	35				75
	IINEPTAAAIAYGLDKK			127.26	10	596.667	1786.98	3	1786.98	-0.004	1	3.2e-12
	ATAGDTHLGGEDFDNR			119.17	4	559.248	1674.72	3	1674.72	-0.001	0	6.7e-12
	GEGPAIGIDLGTTYSCVGVWQHDR			116.76	1	863.413	2587.22	3	2587.21	0.006	0	1.1e-11
	ATAGDTHLGGEDFDNR			116.41	1	838.37	1674.72	2	1674.72	0.001	0	3.2e-11
	SINPDEAVAYGAAVQAAILSGEGNEK			115.45	2	858.759	2573.25	3	2573.26	-0.007	0	1.5e-11
	IINEPTAAAIAYGLDKK			96.88	1	894.496	1786.98	2	1786.98	-0.005	1	1.4e-09
	IINEPTAAAIAYGLDK			96.48	2	830.446	1658.88	2	1658.89	-0.011	0	1.7e-09
	NQVAMNPTNTVFDAK	Oxidation (M)	0.000040000000000.0	89.36	1	833.403	1664.79	2	1664.78	0.01	0	8.7e-09
	TTPSYVAFTDSER			82.06	5	737.348	1472.68	2	1472.68	0.002	0	4.7e-07
	VEIIANDQGNR			80.56	4	614.814	1227.61	2	1227.62	-0.007	0	2.9e-07
	FEELNMDLFR	Oxidation (M)	0.0000040000.0	80.3	1	665.298	1328.58	2	1328.61	-0.026	0	2.3e-07
	VQQLLQDFFNGKELCK			79.04	1	656.665	1966.97	3	1966	0.975	1	9.1e-08
	ARFEELNMDLFR	Oxidation (M)	0.000000040000.0	77.14	1	778.879	1555.74	2	1555.74	-0.001	1	1.4e-07
	NAVVTVPAYFNDSQR			73.51	4	840.919	1679.82	2	1679.83	-0.004	0	1.3e-07
	MVNHFVQEFKR	Oxidation (M)	0.40000000000.0	72.74	1	363.437	1449.72	4	1449.72	-0.002	1	5.7e-07
	MVNHFVQEFKR	Oxidation (M)	0.40000000000.0	71.76	1	484.245	1449.71	3	1449.72	-0.006	1	3.6e-05
	EIAEAFLGSPVK			71.74	2	630.841	1259.67	2	1259.68	-0.008	0	1.8e-05
	YSDPSVQADK			68.18	1	555.258	1108.5	2	1108.5	-0.003	0	6.4e-07
	VQQLLQDFFNGK			68.14	9	718.878	1435.74	2	1435.75	-0.005	0	2.6e-05
	SSVHDVVLVGGSTR			67.29	1	706.87	1411.72	2	1411.74	-0.017	0	9.9e-07
	NALENYAYNMR			63.11	2	679.814	1357.61	2	1357.61	0.005	0	1.4e-05
	MVNHFVQEFK	Oxidation (M)	0.4000000000.0	60.1	3	432.212	1293.62	3	1293.62	-0.002	0	4.1e-05
	DAGVISGLNVMR	Oxidation (M)	0.000000000040.0	57.12	1	624.316	1246.62	2	1246.63	-0.016	0	5e-05
	NALENYAYNMR	Oxidation (M)	0.00000000040.0	56.12	2	687.808	1373.6	2	1373.6	-0.003	0	0.00019
	ARFEELNMDLFR			53.35	2	514.255	1539.74	3	1539.75	-0.006	1	0.001
	ELESLCNPIIAR			49.11	1	707.874	1413.73	2	1413.73	0.005	0	9.1e-05
	ARFEELNMDLFRK	Oxidation (M)	0.0000000400000.0	45.8	1	421.963	1683.83	4	1683.84	-0.016	2	0.00052
	QFSAEEISSMVLIK	Oxidation (M)	0.00000000040000.0	45.13	1	799.397	1596.78	2	1596.81	-0.028	0	5.9e-05
	RYSDPSVQADK			45.05	1	422.542	1264.6	3	1264.61	-0.002	1	0.00057
	DNNLLGK			44.12	1	387.211	772.407	2	772.408	-0.001	0	0.002
	ARFEELNMDLFR	Oxidation (M)	0.000000040000.0	41.72	1	519.586	1555.74	3	1555.74	-0.009	1	0.0026
	NAVVTVPAYFNDSQR			41.09	2	561.28	1680.82	3	1679.83	0.993	0	0.00014
	VQQLLQDFFNGK			38.75	2	479.587	1435.74	3	1435.75	-0.006	0	0.00023
	IPKVQQLLQDFFNGK			35.55	1	592.326	1773.95	3	1773.98	-0.023	1	0.038
	MVNHFVQEFK	Oxidation (M)	0.4000000000.0	30.93	1	647.822	1293.63	2	1293.62	0.013	0	0.0019
AT1G56070.1	34				47
	STLTDSLVAAAGIIAQEVAGDVR			159.58	6	753.071	2256.19	3	2256.2	-0.006	0	1e-14
	YRVENLYEGPLDDQYANAIR			123.85	2	800.389	2398.14	3	2398.16	-0.011	1	3.6e-11
	GVQYLNEIKDSVVAGFQWASK			114.62	2	780.404	2338.19	3	2338.2	-0.005	1	1.8e-11
	NATLTNEKEVDAHPIR			113.46	1	603.313	1806.92	3	1806.92	-0.005	1	1e-10
	ILAEEFGWDKDLAK			93.63	1	545.618	1633.83	3	1633.84	-0.002	1	1.6e-08
	DGNEYLINLIDSPGHVDFSSEVTAALR			86.91	1	978.154	2931.44	3	2931.43	0.014	0	7.1e-09
	ILAEEFGWDKDLAKK			86.05	1	588.316	1761.93	3	1761.93	-0.003	2	1.5e-08
	AYLPVVESFGFSSQLR			82.86	2	900.469	1798.92	2	1798.92	-0.002	0	4.6e-08
	DLQDDFMGGAEIIK	Oxidation (M)	0.00000040000000.0	82.2	1	784.368	1566.72	2	1566.72	-0.003	0	1.8e-07
	STGISLYYEMTDESLK	Oxidation (M)	0.0000000004000000.0	81.95	1	926.925	1851.84	2	1851.85	-0.01	0	2.1e-08
	VIYASQITAKPR			80.16	1	449.597	1345.77	3	1345.77	-0.004	1	4.6e-08
	NCDPNGPLMLYVSK	Oxidation (M)	0.00000000400000.0	78.41	1	812.373	1622.73	2	1622.74	-0.011	0	8.6e-08
	RVIYASQITAK			72.26	1	417.247	1248.72	3	1248.72	-0.001	1	7.8e-07
	AYLPVVESFGFSSQLR			68.27	1	600.647	1798.92	3	1798.92	-0.005	0	6.4e-07
	EAMTPLSEFEDKL	Oxidation (M)	0.0040000000000.0	67.82	1	763.355	1524.69	2	1524.7	-0.007	1	4.6e-07
	LWGENFFDPATR			66.19	2	726.847	1451.68	2	1451.68	-0.003	0	3.3e-06
	EGPLAEENMR	Oxidation (M)	0.0000000040.0	63.13	1	581.267	1160.52	2	1160.51	0.006	0	1.2e-05
	GFVQFCYEPIK			62.27	2	694.336	1386.66	2	1386.66	-0.006	0	2.4e-06
	IMGPNYIPGEKK	Oxidation (M)	0.040000000000.0	60.63	1	454.908	1361.7	3	1361.7	0.002	1	3.5e-06
	IMGPNYIPGEK	Oxidation (M)	0.04000000000.0	55.69	1	618.299	1234.58	2	1233.61	0.978	0	4.4e-05
	DKLWPMLAK	Oxidation (M)	0.000004000.0	54.92	1	373.207	1116.6	3	1116.6	-0.001	1	4.5e-05
	VIYASQITAK			53.18	1	547.313	1092.61	2	1092.62	-0.007	0	0.00018
	DSVVAGFQWASK			48.82	1	647.83	1293.64	2	1293.63	0.01	0	0.0001
	SDPVVSFR			46.05	1	453.742	905.469	2	905.461	0.008	0	0.0014
	FSVSPVVR			45.66	2	445.756	889.498	2	889.502	-0.005	0	0.0077
	FGVVESK			45.04	2	383.21	764.406	2	764.407	-0.001	0	0.0045
	GVQYLNEIK			41.96	1	532.289	1062.56	2	1062.57	-0.007	0	0.018
	IRPVLTVNK			40.5	1	520.333	1038.65	2	1038.65	-0.004	1	0.0023
	GHVFEEMQRPGTPLYNIK	Oxidation (M)	0.000000400000000000.0	38.98	1	533.765	2131.03	4	2131.05	-0.021	1	0.00022
	QIIATCMNDQK	Oxidation (M)	0.00000040000.0	35.29	1	669.312	1336.61	2	1336.61	-0.002	0	0.00098
	GGGQVIPTAR			34.71	2	478.268	954.522	2	954.525	-0.003	0	0.0039
	FTADELR			31.36	1	426.219	850.424	2	850.418	0.005	0	0.18
	NATLTNEKEVDAHPIR			28.98	1	452.738	1806.92	4	1806.92	-0.001	1	0.0019
	LYMEARPMEEGLAEAIDDGR	2 Oxidation (M)	0.00400004000000000000.0	26.75	1	1149.53	2297.05	2	2297.03	0.023	1	0.018
AT5G02490.1	34				75
	IINEPTAAAIAYGLDKK			127.26	10	596.667	1786.98	3	1786.98	-0.004	1	3.2e-12
	NQVAMNPVNTVFDAKR	Oxidation (M)	0.0000400000000000.0	123.64	1	607.307	1818.9	3	1818.9	-0.004	1	4.2e-12
	EQVFSTYSDNQPGVLIQVFEGER			121.42	1	881.41	2641.21	3	2641.27	-0.059	0	7.2e-12
	ATAGDTHLGGEDFDNR			119.17	4	559.248	1674.72	3	1674.72	-0.001	0	6.7e-12
	GEGPAIGIDLGTTYSCVGVWQHDR			116.76	1	863.413	2587.22	3	2587.21	0.006	0	1.1e-11
	ATAGDTHLGGEDFDNR			116.41	1	838.37	1674.72	2	1674.72	0.001	0	3.2e-11
	SINPDEAVAYGAAVQAAILSGEGNEK			115.45	2	858.759	2573.25	3	2573.26	-0.007	0	1.5e-11
	IINEPTAAAIAYGLDKK			96.88	1	894.496	1786.98	2	1786.98	-0.005	1	1.4e-09
	IINEPTAAAIAYGLDK			96.48	2	830.446	1658.88	2	1658.89	-0.011	0	1.7e-09
	NQVAMNPVNTVFDAK	Oxidation (M)	0.000040000000000.0	92.33	3	832.413	1662.81	2	1662.8	0.007	0	2.2e-09
	TTPSYVAFTDSER			82.06	5	737.348	1472.68	2	1472.68	0.002	0	4.7e-07
	VEIIANDQGNR			80.56	4	614.814	1227.61	2	1227.62	-0.007	0	2.9e-07
	VQQLLQDFFNGKELCK			79.04	1	656.665	1966.97	3	1966	0.975	1	9.1e-08
	NAVVTVPAYFNDSQR			73.51	4	840.919	1679.82	2	1679.83	-0.004	0	1.3e-07
	MVNHFVQEFKR	Oxidation (M)	0.40000000000.0	72.74	1	363.437	1449.72	4	1449.72	-0.002	1	5.7e-07
	MVNHFVQEFKR	Oxidation (M)	0.40000000000.0	71.76	1	484.245	1449.71	3	1449.72	-0.006	1	3.6e-05
	VQQLLQDFFNGK			68.14	9	718.878	1435.74	2	1435.75	-0.005	0	2.6e-05
	FSDASVQSDR			64.34	1	556.255	1110.5	2	1110.49	0.002	0	4e-05
	NALENYAYNMR			63.11	2	679.814	1357.61	2	1357.61	0.005	0	1.4e-05
	NQVAMNPVNTVFDAK			62.66	2	824.408	1646.8	2	1646.81	-0.007	0	1.3e-06
	MVNHFVQEFK	Oxidation (M)	0.4000000000.0	60.1	3	432.212	1293.62	3	1293.62	-0.002	0	4.1e-05
	NALENYAYNMR	Oxidation (M)	0.00000000040.0	56.12	2	687.808	1373.6	2	1373.6	-0.003	0	0.00019
	DAGVIAGLNVLR			53.81	1	599.346	1196.68	2	1196.69	-0.01	0	0.00021
	ELESVCNPIIAK			51.88	1	686.854	1371.69	2	1371.71	-0.013	0	0.0003
	STVHEIVLVGGSTR			49.74	1	727.897	1453.78	2	1453.79	-0.01	0	2.2e-05
	DNNLLGK			44.12	1	387.211	772.407	2	772.408	-0.001	0	0.002
	IGEKLPAADKK			42.03	1	585.345	1168.67	2	1168.68	-0.006	2	0.0033
	EIAEAFLGTTVK			42.02	1	426.898	1277.67	3	1277.69	-0.014	0	0.00062
	NAVVTVPAYFNDSQR			41.09	2	561.28	1680.82	3	1679.83	0.993	0	0.00014
	VQQLLQDFFNGK			38.75	2	479.587	1435.74	3	1435.75	-0.006	0	0.00023
	IPKVQQLLQDFFNGK			35.55	1	592.326	1773.95	3	1773.98	-0.023	1	0.038
	EIAEAFLGTTVK			34.16	1	640.342	1278.67	2	1277.69	0.982	0	0.011
	MVNHFVQEFK	Oxidation (M)	0.4000000000.0	30.93	1	647.822	1293.63	2	1293.62	0.013	0	0.0019
	QFAAEEISSMVLIK			28.29	1	522.613	1564.82	3	1564.82	0.001	0	0.027
ATCG00480.1	34				67
	IFNVLGEPVDNLGPVDTR			114.77	1	978.01	1954.01	2	1954.02	-0.01	0	2.1e-10
	GIYPAVDPLDSTSTMLQPR	Oxidation (M)	0.0000000000000040000.0	112.24	1	1039.02	2076.03	2	2076.02	0.007	0	3e-11
	DTLGQEINVTCEVQQLLGNNR			111.15	1	801.388	2401.14	3	2400.17	0.972	0	6.7e-11
	FVQAGSEVSALLGR			97.71	6	717.388	1432.76	2	1432.77	-0.006	0	6.4e-09
	VALVYGQMNEPPGAR	Oxidation (M)	0.000000040000000.0	96.49	2	809.401	1616.79	2	1616.8	-0.011	0	1.1e-09
	IAQIIGPVLDVAFPPGK			95.46	6	579.006	1734	3	1734.01	-0.011	0	1.1e-09
	IFNVLGEPVDNLGPVDTR			90.68	2	652.343	1954.01	3	1954.02	-0.007	0	2.1e-08
	DVNEQDVLLFIDNIFR			87.92	1	650.668	1948.98	3	1948.99	-0.008	0	9.2e-09
	MPNIYNALVVK	Oxidation (M)	0.40000000000.0	84.5	2	639.349	1276.68	2	1276.68	-0.002	0	1e-07
	VGLTALTMAEYFR			84.23	1	736.383	1470.75	2	1470.75	-0.003	0	7.8e-08
	ESGVINEQNLAESK			82.37	2	759.377	1516.74	2	1516.74	0.002	0	1.2e-07
	IVGEEHYETAQQVK			75.57	2	544.271	1629.79	3	1629.8	-0.008	0	1.4e-07
	MPSAVGYQPTLSTEMGTLQER	2 Oxidation (M)	0.400000000000004000000.0	74.1	1	1164.53	2327.05	2	2327.08	-0.031	0	1.1e-07
	TNPTTSNPEVSIR			73.55	3	708.356	1414.7	2	1414.7	-0.009	0	1.5e-06
	VGLTALTMAEYFR	Oxidation (M)	0.0000000400000.0	72.82	2	744.375	1486.73	2	1486.75	-0.014	0	2.3e-07
	GIYPAVDPLDSTSTMLQPR	Oxidation (M)	0.0000000000000040000.0	71.87	2	693.015	2076.02	3	2076.02	0.004	0	1.8e-07
	AVAMSATEGLKR	Oxidation (M)	0.000400000000.0	69.28	1	417.221	1248.64	3	1248.65	-0.007	1	1.8e-06
	TVLIMELINNIAK	Oxidation (M)	0.0000400000000.0	67.65	5	744.426	1486.84	2	1486.84	-0.004	0	9.5e-06
	RTNPTTSNPEVSIR	Acetyl (Protein N-term)	1.00000000000000.0	66.61	1	807.406	1612.8	2	1612.82	-0.02	1	2.6e-06
	FVQAGSEVSALLGR			64.54	1	478.922	1433.74	3	1432.77	0.976	0	3.5e-05
	AVAMSATEGLK	Oxidation (M)	0.00040000000.0	64.3	2	547.281	1092.55	2	1092.55	-0.002	0	1.1e-05
	SAPAFIELDTK			61.52	1	596.315	1190.62	2	1190.62	-0.004	0	2.1e-06
	TVLIMELINNIAK			56.71	3	736.427	1470.84	2	1470.85	-0.009	0	0.00032
	TREGNDLYMEMK	2 Oxidation (M)	0.000000004040.0	56.44	1	506.892	1517.65	3	1517.65	0.006	1	1.1e-05
	LSIFETGIK			51.26	4	504.289	1006.56	2	1006.57	-0.007	0	0.0011
	TVLIMELINNIAK			48.06	1	491.29	1470.85	3	1470.85	-0.001	0	0.002
	IGLFGGAGVGK			43.35	4	488.282	974.55	2	974.555	-0.005	0	0.0014
	MPNIYNALVVK			40.01	1	631.344	1260.67	2	1260.69	-0.017	0	0.00069
	AVAMSATEGLK			39.59	1	539.277	1076.54	2	1076.55	-0.014	0	0.033
	VVDLLAPYRR			39.35	1	401.239	1200.69	3	1200.7	-0.002	1	0.022
	VVDLLAPYR			38.19	1	523.303	1044.59	2	1044.6	-0.005	0	0.0024
	RGMDVVDMGNPLSVPVGGATLGR	2 Oxidation (M)	0.00400004000000000000000.0	37.47	2	777.728	2330.16	3	2329.15	1.009	1	0.00043
	AHGGVSVFGGVGER			32.89	1	664.833	1327.65	2	1327.66	-0.011	0	0.0013
	ATNLEMESK			32.2	1	511.747	1021.48	2	1021.48	0.004	0	0.016
AT2G21390.1	33				37
	SSLPIPTDAIFYAGTGNLLCR			119.88	1	756.056	2265.14	3	2265.15	-0.001	0	1.1e-11
	ILENAGHLPLAYITASVHGLTDIAER			109.76	1	694.361	2773.42	4	2773.48	-0.06	0	5.7e-11
	LAIELGDNVPSLPEGK			96.21	1	826.442	1650.87	2	1650.88	-0.013	0	1.8e-09
	GPPALVFDFSQLEAK			88.2	1	540.626	1618.86	3	1617.84	1.017	0	5.4e-09
	SLLDTNPTIESQAR			86.58	1	772.896	1543.78	2	1543.78	-0.006	0	1.9e-08
	VSGNTIFCLDR			80.43	1	641.314	1280.61	2	1280.62	-0.006	0	2.3e-07
	QDIIVSNSEDK			79.89	2	624.312	1246.61	2	1246.6	0.005	0	6.2e-06
	ERPAFALSGDSLFYAK			78.43	1	591.296	1770.87	3	1770.89	-0.029	1	6.2e-07
	NNVMGQFHNALYLGDVK	Oxidation (M)	0.00040000000000000.0	76.54	1	646	1934.98	3	1934.93	0.047	0	6.7e-08
	LVLGELQTPFVR			75.85	1	686.4	1370.79	2	1370.79	-0.007	0	4e-06
	GVNWASFHPTLPLIVSGADDR			72.56	2	751.38	2251.12	3	2251.14	-0.021	0	1.6e-07
	GTGGSAVFIAR			72.48	1	518.281	1034.55	2	1034.55	-0.003	0	4.2e-06
	VFLSILQTIPLVVVESR			71.26	1	638.725	1913.15	3	1912.14	1.015	0	2.3e-07
	SEDKVVIFDLQQR			71.25	1	526.282	1575.82	3	1575.83	-0.002	1	2.6e-06
	CLFTLLGHLDYIR			65.55	2	540.953	1619.84	3	1619.85	-0.014	0	2.3e-05
	LVLQCTLHETIR			65.34	1	741.903	1481.79	2	1481.8	-0.011	0	8e-06
	LSFLYLITGNLDK			65.29	2	748.92	1495.83	2	1495.83	-0.004	0	4.8e-05
	LGVEALR			63.74	1	379.231	756.447	2	756.449	-0.002	0	6.4e-05
	AFSSSPVVPLAIER			57.74	1	736.905	1471.8	2	1471.8	-0.008	0	4.3e-05
	GIFEGGLESANR			55.65	1	625.309	1248.6	2	1248.61	-0.007	0	9.6e-05
	TLDVPIYITK			52.51	1	582.339	1162.66	2	1161.66	0.999	0	0.00024
	GPPALVFDFSQLEAK			49.37	1	809.926	1617.84	2	1617.84	-0.003	0	2.3e-05
	FSQMNSDLFGGVDAIVK	Oxidation (M)	0.00040000000000000.0	48.15	1	922.445	1842.88	2	1842.88	-0.007	0	3.1e-05
	SASPADDLMR	Oxidation (M)	0.0000000040.0	45.2	1	539.748	1077.48	2	1077.48	0.005	0	0.0001
	GFPEVALHFVEDERIR			44.98	1	479.497	1913.96	4	1912.98	0.978	1	6.1e-05
	YCLPNGDSGIIR			42.41	1	682.839	1363.66	2	1363.65	0.007	0	0.00016
	GWSESSSPNVR			41.33	1	603.788	1205.56	2	1204.55	1.015	0	0.0011
	GFPEVALHFVEDER			40.99	1	548.939	1643.8	3	1643.79	0.001	0	0.00014
	DSQVIPIR			37.56	1	464.264	926.513	2	926.519	-0.005	0	0.0079
	RPGTPSLNQSPR			33.51	1	655.344	1308.67	2	1308.69	-0.016	1	0.004
	VSGNTIFCLDRDGK			32.72	1	527.925	1580.75	3	1580.76	-0.007	1	0.00085
	EDLVVSASLDQTVR			28.76	1	766.405	1530.8	2	1530.79	0.007	0	0.021
	VWDIGALK			27.94	1	451.26	900.506	2	900.507	-0.001	0	0.087
AT5G14740.2	33				90
	VLAESESSAFEDQCGR			130.96	2	892.89	1783.77	2	1783.77	-0.002	0	5.3e-13
	LLIEKDDLKDVAAAK			117.84	3	547.98	1640.92	3	1640.93	-0.015	2	2.8e-10
	EAVNVSLANLLTYPFVR			115.37	1	953.523	1905.03	2	1905.04	-0.004	0	6.3e-11
	KITAELQAASSSDSK			109.32	1	768.884	1535.75	2	1534.78	0.97	1	2.9e-10
	YAGVGAAIEYAVLHLK			108.92	20	558.978	1673.91	3	1673.91	-0.001	0	6.5e-11
	ITAELQAASSSDSK			104.24	8	704.354	1406.69	2	1406.69	0.004	0	8.3e-10
	KITAELQAASSSDSK			102.66	1	512.6	1534.78	3	1534.78	-0.006	1	2e-09
	GNESYEDAIEALKK	Acetyl (Protein N-term)	1.00000000000000.0	89.89	2	804.889	1607.76	2	1607.77	-0.004	1	4e-08
	VENIVVIGHSACGGIK			85.39	1	826.942	1651.87	2	1651.87	-0.003	0	2.8e-07
	EAVNVSLANLLTYPFVR			82.47	8	636.347	1906.02	3	1905.04	0.983	0	3.5e-08
	GLMSFPLDGNNSTDFIEDWVK	Oxidation (M)	0.004000000000000000000.0	81.5	3	801.038	2400.09	3	2400.09	-0.003	0	2.3e-08
	VENIVVIGHSACGGIK			81.17	1	551.629	1651.87	3	1651.87	-0.006	0	7.4e-08
	VCPSHVLDFHPGDAFVVR			78.6	3	513.757	2051	4	2051.01	-0.004	0	4.3e-08
	GNESYEDAIEALKK			76.1	2	522.925	1565.75	3	1565.76	-0.005	1	7.3e-08
	EKYETNPALYGELAK			75.9	3	575.959	1724.86	3	1724.86	-0.007	1	6.5e-07
	IKEGFVTFK			73.91	2	534.806	1067.6	2	1067.6	-0.005	1	6.5e-06
	LLIEKDDLKDVAAAK			73.71	2	411.239	1640.93	4	1640.93	-0.007	2	8.7e-07
	EAVNVSLANLLTYPFVR	Glu->pyro-Glu (N-term E)	3.00000000000000000.0	72.52	1	630.006	1887	3	1887.03	-0.029	0	3e-07
	YETNPALYGELAK			68.5	3	734.867	1467.72	2	1467.72	-0.005	0	1.2e-06
	VKYAGVGAAIEYAVLHLK			67	1	476.275	1901.07	4	1901.08	-0.007	1	5.2e-07
	DDLKDVAAAK			67	1	523.276	1044.54	2	1044.55	-0.008	1	4.9e-05
	NIANMVPPFDK	Oxidation (M)	0.00004000000.0	62.5	3	631.315	1260.62	2	1260.62	-0.002	0	9.6e-06
	LLIEKDDLK			54.47	1	362.884	1085.63	3	1085.63	-0.003	1	0.0007
	SFDPVER			53.97	2	425.209	848.402	2	848.403	0	0	0.0001
	YMVFACSDSR	Oxidation (M)	0.0400000000.0	52.31	2	626.256	1250.5	2	1250.51	-0.008	0	1.2e-05
	EGFVTFKK			52.16	1	478.764	955.513	2	954.517	0.995	1	0.00016
	IKEGFVTFK			50.78	1	356.873	1067.6	3	1067.6	-0.005	1	0.00033
	LLIEKDDLK			46.82	3	543.822	1085.63	2	1085.63	-0.003	1	0.0041
	NIANMVPPFDKVK	Oxidation (M)	0.0000400000000.0	45.56	2	496.93	1487.77	3	1487.78	-0.012	1	5.3e-05
	YMVFACSDSR			42.39	2	618.265	1234.52	2	1234.51	0.005	0	0.00025
	EGFVTFK			40.54	2	414.217	826.419	2	826.423	-0.004	0	0.0062
	IKEGFVTFKK			38.9	1	598.852	1195.69	2	1195.7	-0.008	2	0.019
	NIANMVPPFDK			34.87	1	623.323	1244.63	2	1244.62	0.01	0	0.0019
AT1G55490.1	31				42
	ATLDNDEEKVGADIVKR			123.22	1	624.992	1871.95	3	1871.96	-0.005	2	7e-12
	GGYPILIIAEDIEQEALATLVVNK			122.3	1	857.47	2569.39	3	2568.41	0.984	0	3.4e-12
	DLVGVLEDAIR			101.2	1	400.559	1198.65	3	1198.66	-0.001	0	1.5e-08
	TNDLAGDGTTTSVVLAQGFIAEGVK			94.78	1	822.091	2463.25	3	2463.25	0.001	0	1.6e-09
	NLIEQAEQDYEKEK			94.12	1	868.922	1735.83	2	1735.83	0.004	1	1.2e-08
	IVNDGVTVAR			81	2	522.292	1042.57	2	1042.58	-0.007	0	1.8e-06
	ETSTIVGDGSTQDAVKK			79.9	1	579.297	1734.87	3	1734.86	0.005	1	1.5e-07
	LADLVGVTLGPK			78.14	1	591.856	1181.7	2	1181.7	-0.004	0	2e-07
	NAGVNGSVVSEK			76.52	2	580.794	1159.57	2	1159.58	-0.009	0	4.1e-07
	SAENNLYVVEGMQFDR	Oxidation (M)	0.0000000000040000.0	71.29	1	944.93	1887.85	2	1886.85	0.999	0	2.1e-07
	DLVGVLEDAIR			67.05	7	600.332	1198.65	2	1198.66	-0.007	0	4.1e-05
	ETSTIVGDGSTQDAVK			64.6	1	804.391	1606.77	2	1606.77	0	0	1.8e-05
	GYISPYFVTDSEK			64.18	2	753.359	1504.7	2	1504.71	-0.006	0	1.5e-06
	EEVGLSLDK			63.4	1	495.259	988.504	2	988.508	-0.003	0	0.00013
	AAVEEGIVVGGGCTLLR			63.35	1	850.954	1699.89	2	1699.89	0	0	8.8e-06
	VVAAGANPVLITR			60.93	1	640.885	1279.76	2	1279.76	-0.006	0	8.3e-06
	ATLDNDEEKVGADIVK			59.27	1	572.953	1715.84	3	1715.86	-0.021	1	2.8e-06
	CCLEHAASVAK			54.74	1	623.291	1244.57	2	1244.56	0.002	0	3.1e-05
	EVELEDPVENIGAK			51.36	2	771.388	1540.76	2	1540.76	-0.001	0	0.00014
	LRVEDALNATK			50.56	1	615.343	1228.67	2	1228.68	-0.006	1	0.00074
	SQYLDDIAILTGATVIR			49.9	1	617.336	1848.99	3	1848	0.988	0	2.1e-05
	ALVTELKK			48.79	1	451.282	900.549	2	900.564	-0.015	1	0.0026
	NLIEQAEQDYEK			47.73	1	740.364	1478.71	2	1478.69	0.024	0	0.0041
	FGYNAATGK			45.64	1	464.727	927.44	2	927.445	-0.005	0	0.0035
	ALSYPLK			44.64	2	396.236	790.458	2	790.459	-0.001	0	0.0062
	NLIEQAEQDYEKEKLNER			43.22	1	750.37	2248.09	3	2248.1	-0.008	2	0.00031
	LLLVDKK			43.01	1	414.778	827.541	2	827.548	-0.007	1	0.0048
	ALVTELK			39.92	1	387.238	772.462	2	772.469	-0.008	0	0.032
	NLIEQAEQDYEKEK			39.66	1	579.618	1735.83	3	1735.83	0.007	1	0.00039
	GVVTLEEGK			37.46	1	466.258	930.502	2	930.502	-0.001	0	0.005
	VEDALNATK			29.21	1	480.759	959.503	2	959.492	0.011	0	0.16
AT3G48870.1	31				37
	LIGSPPGYVGYTEGGQLTEAVR			122.15	1	755.384	2263.13	3	2263.15	-0.017	0	7e-12
	YTDEALVAAAQLSHQYISDR			113.19	1	751.04	2250.1	3	2250.09	0.007	0	3.2e-11
	LGHNFVGTEQILLGLIGEGTGIAAK			93.52	1	628.096	2508.35	4	2507.38	0.979	0	2.3e-09
	LAEEGKLDPVVGR			86.55	2	691.883	1381.75	2	1381.76	-0.005	1	9.6e-08
	GELQCIGATTIDEYRK			83.73	1	927.459	1852.9	2	1852.9	0.005	1	1.4e-08
	VPEPTVEEAIQILQGLR			83.61	1	631.347	1891.02	3	1891.04	-0.022	0	8.3e-07
	MPTLEEYGTNLTK	Oxidation (M)	0.4000000000000.0	83.19	1	756.86	1511.7	2	1511.72	-0.013	0	7.9e-08
	NTLLIMTSNVGSSVIEK	Oxidation (M)	0.00000400000000000.0	83.1	1	911.47	1820.93	2	1820.95	-0.029	0	6.6e-08
	IASGDVPETIEGK			78.47	1	658.34	1314.66	2	1314.67	-0.002	0	2e-06
	NPNRPIASFIFSGPTGVGK			76.78	1	980.017	1958.02	2	1958.04	-0.019	1	6.3e-08
	TAIAEGLAQR			74.55	2	515.285	1028.56	2	1028.56	-0.006	0	6.8e-06
	VLENLGADPSNIR			69.98	1	699.366	1396.72	2	1396.73	-0.013	0	4.1e-06
	TKNNPCLIGEPGVGK			66.22	1	792.4	1582.79	2	1582.81	-0.028	1	1.6e-05
	VLELSLEEAR			65.99	2	579.816	1157.62	2	1157.63	-0.012	0	1.3e-05
	AIDLIDEAGSR			62.31	1	580.299	1158.58	2	1158.59	-0.005	0	0.00014
	VIGQDEAVK			61.16	1	479.762	957.509	2	957.513	-0.004	0	0.00016
	LDEMIVFR	Oxidation (M)	0.00040000.0	60.59	1	520.272	1038.53	2	1037.52	1.009	0	7.4e-05
	GSGFVAVEIPFTPR			60	2	738.893	1475.77	2	1475.78	-0.005	0	3.7e-06
	HIEKDPALER			51.61	2	403.218	1206.63	3	1206.64	-0.003	1	6.6e-05
	VVQILAR			44.99	1	399.763	797.512	2	797.512	0	0	0.0016
	LLEDSMAEK	Oxidation (M)	0.000004000.0	43.94	2	526.251	1050.49	2	1050.49	-0.003	0	0.00012
	SLVTEELK			41.65	1	459.759	917.503	2	917.507	-0.004	0	0.022
	LDPVVGR			38.11	1	378.22	754.426	2	754.434	-0.008	0	0.018
	QYFRPEFLNR			36.83	1	457.237	1368.69	3	1368.69	-0.005	1	0.00079
	EIELQVTER			35.9	1	558.793	1115.57	2	1115.58	-0.01	0	0.0063
	IASGDVPETIEGK			32.6	1	439.231	1314.67	3	1314.67	0.006	0	0.0087
	SMGINLK	Oxidation (M)	0.0400000.0	32.49	1	389.709	777.404	2	777.405	-0.001	0	0.087
	SLVTEELKQYFRPEFLNR			32.3	1	568.067	2268.24	4	2268.19	0.05	2	0.0022
	RVLELSLEEAR			32.04	1	438.917	1313.73	3	1313.73	-0.002	1	0.14
	ALAAYYFGSEEAMIR	Oxidation (M)	0.000000000000400.0	31.5	1	854.399	1706.78	2	1706.8	-0.013	0	0.0048
	QYFRPEFLNR	Gln->pyro-Glu (N-term Q)	2.0000000000.0	27.84	1	676.842	1351.67	2	1351.67	0.003	1	0.0081
AT1G54270.1	30				53
	LETLCDLYETLAITQSVIFVNTR			118.21	1	900.482	2698.42	3	2698.39	0.035	0	1.3e-11
	TATFCSGVLQQLDYALLQCQALVLAPTR			117.14	1	1046.88	3137.6	3	3136.61	0.998	0	2.9e-10
	FYNVVVEELPSNVADLL			105.42	2	641.003	1919.99	3	1919.99	-0.002	0	1.3e-10
	IQVGVFSATMPPEALEITR	Oxidation (M)	0.0000000004000000000.0	104.28	1	692.363	2074.07	3	2074.08	-0.011	0	4e-10
	ILQAGVHVVVGTPGR			103.47	3	501.629	1501.87	3	1501.87	-0.007	0	5e-09
	GIDVQQVSLVINFDLPTQPENYLHR			94.68	1	966.17	2895.49	3	2894.49	0.996	0	2.6e-09
	GIYAYGFEKPSAIQQR			90.46	3	609.984	1826.93	3	1826.93	-0.002	1	1.2e-08
	GLDVIQQAQSGTGK			84.59	3	701.867	1401.72	2	1400.73	0.993	0	9.5e-08
	LETLCDLYETLAITQSVIFVNTR			84.24	1	675.607	2698.4	4	2698.39	0.008	0	1.7e-08
	GVAINFVTLDDQR			78.23	3	724.371	1446.73	2	1446.75	-0.02	0	4.2e-06
	MFVLDEADEMLSR	2 Oxidation (M)	0.4000000004000.0	73.74	1	794.35	1586.68	2	1586.7	-0.01	0	3.2e-07
	RDELTLEGIK			73.03	2	587.325	1172.63	2	1172.64	-0.005	1	1.4e-05
	SRDHTVSATHGDMDQNTR			70.44	1	507.727	2026.88	4	2026.89	-0.01	1	2.5e-07
	VHACVGGTSVR			69.88	1	571.785	1141.56	2	1141.57	-0.011	0	1.6e-06
	VLITTDLLAR			69.48	5	557.843	1113.67	2	1113.68	-0.005	0	1.2e-05
	GFKDQIYDIFQLLPPK			68.36	5	641.682	1922.03	3	1921.04	0.99	1	9.1e-06
	AGSAPEGTQFDTR	Acetyl (Protein N-term)	1.0000000000000.0	64.74	1	689.818	1377.62	2	1377.62	0.006	0	2.9e-06
	DQIYDIFQLLPPK			62.63	2	530.619	1588.84	3	1588.85	-0.015	0	2.1e-06
	KGVAINFVTLDDQR			61.5	1	525.948	1574.82	3	1574.84	-0.019	1	1.1e-05
	QFYVNVEKEDWK			61.16	1	792.88	1583.75	2	1583.76	-0.016	1	0.00014
	ALGDYQGVK			55.65	1	475.747	949.48	2	949.487	-0.007	0	2.2e-05
	KVDWLTDK			54.82	1	502.774	1003.53	2	1003.53	-0.001	1	0.001
	GFKDQIYDIFQLLPPK			53.66	3	481.265	1921.03	4	1921.04	-0.004	1	9.4e-06
	ELAQQIEK			53	2	479.762	957.51	2	957.513	-0.003	0	0.0012
	VDWLTDK			48.86	1	438.727	875.439	2	875.439	0	0	0.0018
	DELTLEGIK			46.75	2	509.276	1016.54	2	1016.54	-0.002	0	0.0039
	QFYVNVEK			45.26	1	513.765	1025.52	2	1025.52	-0.002	0	0.0036
	QSLRPDCIK			36.51	1	558.787	1115.56	2	1115.58	-0.017	1	0.0072
	MLFDIQK	Oxidation (M)	0.4000000.0	34.3	1	455.736	909.457	2	909.463	-0.006	0	0.0091
	GIVPFCK			33.09	1	410.72	819.426	2	819.431	-0.005	0	0.028
AT2G39730.2	30				69
	VQLAETYLSQAALGDANADAIGR			157.71	3	783.389	2347.14	3	2346.18	0.963	0	5.5e-15
	RVQLAETYLSQAALGDANADAIGR			144.83	1	835.093	2502.26	3	2502.28	-0.026	1	7.8e-14
	GMVDSVFQAPMGTGTHHAVLSSYEYVSQGLR	2 Oxidation (M)	0.0400000000400000000000000000000.0	119.63	1	839.887	3355.52	4	3355.56	-0.042	0	6.1e-12
	GLAYDTSDDQQDITR			116.26	4	849.384	1696.75	2	1696.75	-0.001	0	3.8e-11
	KFVESLGVEK			107.11	2	568.32	1134.62	2	1134.63	-0.003	1	4.3e-09
	IKDEDIVTLVDQFPGQSIDFFGALR			103.43	2	941.827	2822.46	3	2822.45	0.011	1	3.8e-10
	MGINPIMMSAGELESGNAGEPAK	3 Oxidation (M)	0.40000044000000000000000.0	90.33	1	1176.53	2351.05	2	2351.04	0.008	0	4e-09
	MCCLFINDLDAGAGR	Oxidation (M)	0.400000000000000.0	84.11	1	864.873	1727.73	2	1727.74	-0.011	0	1.6e-08
	VPIICTGNDFSTLYAPLIR			83.64	5	717.379	2149.12	3	2149.12	-0.008	0	2.7e-08
	NFLTLPNIKVPLILGIWGGK			80.73	1	731.773	2192.3	3	2192.31	-0.01	1	2.7e-08
	EGPPVFEQPEMTYEK	Oxidation (M)	0.000000000040000.0	68.26	2	898.9	1795.79	2	1795.8	-0.013	0	1.3e-06
	GTFYGKTEEKEPSK			64.66	1	400.953	1599.78	4	1599.78	0.006	2	8.7e-07
	YREAADLIK			62.82	1	360.2	1077.58	3	1077.58	-0.003	1	6.1e-05
	IKDEDIVTLVDQFPGQSIDFFGALR			62.49	2	706.62	2822.45	4	2822.45	0	1	2.7e-06
	VPLILGIWGGK			60.2	22	576.858	1151.7	2	1151.71	-0.006	0	2.7e-05
	GTFYGKTEEKEPSK			60.12	1	534.263	1599.77	3	1599.78	-0.01	2	2.3e-06
	SFQCELVMAK			55.46	2	606.79	1211.57	2	1211.57	-0.002	0	8.4e-06
	EAADLIK			55.14	2	380.215	758.415	2	758.417	-0.002	0	0.00084
	SFQCELVMAK	Oxidation (M)	0.0000000400.0	53.68	1	614.797	1227.58	2	1227.56	0.016	0	2.1e-05
	ARVYDDEVR			50.63	1	375.187	1122.54	3	1121.55	0.992	1	0.00017
	GLAYDTSDDQQDITR			48.06	1	566.591	1696.75	3	1696.75	-0.002	0	3.1e-05
	MGINPIMMSAGELESGNAGEPAK	2 Oxidation (M)	0.00000044000000000000000.0	47.27	1	779.68	2336.02	3	2335.05	0.969	0	3.7e-05
	YREAADLIK			46.73	1	539.797	1077.58	2	1077.58	-0.002	1	0.0058
	FVESLGVEK			46.53	3	504.27	1006.52	2	1006.53	-0.008	0	0.017
	EGPPVFEQPEMTYEK			42.75	1	890.904	1779.79	2	1779.8	-0.009	0	9.8e-05
	NFLTLPNIK			42.5	2	530.311	1058.61	2	1058.61	-0.005	0	0.0047
	VQLAETYLSQAALGDANADAIGR			40.91	1	587.548	2346.16	4	2346.18	-0.02	0	0.00015
	VYDDEVR			38.79	1	448.21	894.406	2	894.408	-0.002	0	0.00079
	EAADLIK	Glu->pyro-Glu (N-term E)	3.0000000.0	31.96	1	371.208	740.402	2	740.407	-0.005	0	0.072
	FYWAPTR			28.79	1	470.736	939.458	2	939.46	-0.002	0	0.032
AT3G13920.1	30				54
	LETLCDLYETLAITQSVIFVNTR			118.21	1	900.482	2698.42	3	2698.39	0.035	0	1.3e-11
	FYNVVVEELPSNVADLL			105.42	2	641.003	1919.99	3	1919.99	-0.002	0	1.3e-10
	IQVGVFSATMPPEALEITR	Oxidation (M)	0.0000000004000000000.0	104.28	1	692.363	2074.07	3	2074.08	-0.011	0	4e-10
	ILQAGVHVVVGTPGR			103.47	3	501.629	1501.87	3	1501.87	-0.007	0	5e-09
	AGSAPEGTQFDAR	Acetyl (Protein N-term)	1.0000000000000.0	98.2	2	674.809	1347.6	2	1347.61	-0.002	0	3.9e-09
	GIDVQQVSLVINFDLPTQPENYLHR			94.68	1	966.17	2895.49	3	2894.49	0.996	0	2.6e-09
	GIYAYGFEKPSAIQQR			90.46	3	609.984	1826.93	3	1826.93	-0.002	1	1.2e-08
	GLDVIQQAQSGTGK			84.59	3	701.867	1401.72	2	1400.73	0.993	0	9.5e-08
	LETLCDLYETLAITQSVIFVNTR			84.24	1	675.607	2698.4	4	2698.39	0.008	0	1.7e-08
	KGVAINFVTR			81.09	1	552.827	1103.64	2	1103.64	-0.005	1	1.2e-06
	MFVLDEADEMLSR	2 Oxidation (M)	0.4000000004000.0	73.74	1	794.35	1586.68	2	1586.7	-0.01	0	3.2e-07
	RDELTLEGIK			73.03	2	587.325	1172.63	2	1172.64	-0.005	1	1.4e-05
	SRDHTVSATHGDMDQNTR			70.44	1	507.727	2026.88	4	2026.89	-0.01	1	2.5e-07
	VHACVGGTSVR			69.88	1	571.785	1141.56	2	1141.57	-0.011	0	1.6e-06
	VLITTDLLAR			69.48	5	557.843	1113.67	2	1113.68	-0.005	0	1.2e-05
	GFKDQIYDIFQLLPPK			68.36	5	641.682	1922.03	3	1921.04	0.99	1	9.1e-06
	QFYVNVEKEEWK			65.73	1	799.892	1597.77	2	1597.78	-0.009	1	3.1e-05
	DQIYDIFQLLPPK			62.63	2	530.619	1588.84	3	1588.85	-0.015	0	2.1e-06
	GVAINFVTR			60.58	2	488.779	975.544	2	975.55	-0.006	0	0.00017
	KVDWLTDK			54.82	1	502.774	1003.53	2	1003.53	-0.001	1	0.001
	GFKDQIYDIFQLLPPK			53.66	3	481.265	1921.03	4	1921.04	-0.004	1	9.4e-06
	ELAQQIEK			53	2	479.762	957.51	2	957.513	-0.003	0	0.0012
	ALGDYLGVK			52	2	468.261	934.508	2	934.512	-0.004	0	0.0016
	VDWLTDK			48.86	1	438.727	875.439	2	875.439	0	0	0.0018
	DELTLEGIK			46.75	2	509.276	1016.54	2	1016.54	-0.002	0	0.0039
	QFYVNVEK			45.26	1	513.765	1025.52	2	1025.52	-0.002	0	0.0036
	QFYVNVEKEEWK			38.79	1	533.6	1597.78	3	1597.78	0.001	1	0.0003
	MLFDIQK	Oxidation (M)	0.4000000.0	34.3	1	455.736	909.457	2	909.463	-0.006	0	0.0091
	GIVPFCK			33.09	1	410.72	819.426	2	819.431	-0.005	0	0.028
	GVAINFVTRDDER			27.15	1	498.266	1491.78	3	1490.75	1.028	1	0.23
AT2G39730.1	29				68
	VQLAETYLSQAALGDANADAIGR			157.71	3	783.389	2347.14	3	2346.18	0.963	0	5.5e-15
	RVQLAETYLSQAALGDANADAIGR			144.83	1	835.093	2502.26	3	2502.28	-0.026	1	7.8e-14
	GMVDSVFQAPMGTGTHHAVLSSYEYVSQGLR	2 Oxidation (M)	0.0400000000400000000000000000000.0	119.63	1	839.887	3355.52	4	3355.56	-0.042	0	6.1e-12
	GLAYDTSDDQQDITR			116.26	4	849.384	1696.75	2	1696.75	-0.001	0	3.8e-11
	KFVESLGVEK			107.11	2	568.32	1134.62	2	1134.63	-0.003	1	4.3e-09
	GAQQVNLPVPEGCTDPVAENFDPTAR			104.65	1	928.113	2781.32	3	2781.3	0.014	0	1.5e-10
	IKDEDIVTLVDQFPGQSIDFFGALR			103.43	2	941.827	2822.46	3	2822.45	0.011	1	3.8e-10
	MGINPIMMSAGELESGNAGEPAK	3 Oxidation (M)	0.40000044000000000000000.0	90.33	1	1176.53	2351.05	2	2351.04	0.008	0	4e-09
	MCCLFINDLDAGAGR	Oxidation (M)	0.400000000000000.0	84.11	1	864.873	1727.73	2	1727.74	-0.011	0	1.6e-08
	VPIICTGNDFSTLYAPLIR			83.64	5	717.379	2149.12	3	2149.12	-0.008	0	2.7e-08
	NFLTLPNIKVPLILGIWGGK			80.73	1	731.773	2192.3	3	2192.31	-0.01	1	2.7e-08
	EGPPVFEQPEMTYEK	Oxidation (M)	0.000000000040000.0	68.26	2	898.9	1795.79	2	1795.8	-0.013	0	1.3e-06
	YREAADLIK			62.82	1	360.2	1077.58	3	1077.58	-0.003	1	6.1e-05
	IKDEDIVTLVDQFPGQSIDFFGALR			62.49	2	706.62	2822.45	4	2822.45	0	1	2.7e-06
	VPLILGIWGGK			60.2	22	576.858	1151.7	2	1151.71	-0.006	0	2.7e-05
	SFQCELVMAK			55.46	2	606.79	1211.57	2	1211.57	-0.002	0	8.4e-06
	EAADLIK			55.14	2	380.215	758.415	2	758.417	-0.002	0	0.00084
	SFQCELVMAK	Oxidation (M)	0.0000000400.0	53.68	1	614.797	1227.58	2	1227.56	0.016	0	2.1e-05
	ARVYDDEVR			50.63	1	375.187	1122.54	3	1121.55	0.992	1	0.00017
	GLAYDTSDDQQDITR			48.06	1	566.591	1696.75	3	1696.75	-0.002	0	3.1e-05
	MGINPIMMSAGELESGNAGEPAK	2 Oxidation (M)	0.00000044000000000000000.0	47.27	1	779.68	2336.02	3	2335.05	0.969	0	3.7e-05
	YREAADLIK			46.73	1	539.797	1077.58	2	1077.58	-0.002	1	0.0058
	FVESLGVEK			46.53	3	504.27	1006.52	2	1006.53	-0.008	0	0.017
	EGPPVFEQPEMTYEK			42.75	1	890.904	1779.79	2	1779.8	-0.009	0	9.8e-05
	NFLTLPNIK			42.5	2	530.311	1058.61	2	1058.61	-0.005	0	0.0047
	VQLAETYLSQAALGDANADAIGR			40.91	1	587.548	2346.16	4	2346.18	-0.02	0	0.00015
	VYDDEVR			38.79	1	448.21	894.406	2	894.408	-0.002	0	0.00079
	EAADLIK	Glu->pyro-Glu (N-term E)	3.0000000.0	31.96	1	371.208	740.402	2	740.407	-0.005	0	0.072
	FYWAPTR			28.79	1	470.736	939.458	2	939.46	-0.002	0	0.032
AT4G14960.2	29				42
	LADNCTGLQGFLVFNAVGGGTGSGLGSLLLER			168.75	1	1065.55	3193.63	3	3192.62	1.004	0	1.5e-16
	FDGALNVDVTEFQTNLVPYPR			114.3	2	799.062	2394.16	3	2394.19	-0.022	0	1.1e-10
	AVFVDLEPTVIDEVR			110.92	3	567.972	1700.89	3	1700.9	-0.004	0	8e-11
	LVSQVISSLTASLR			106.58	6	737.433	1472.85	2	1472.86	-0.006	0	2.5e-09
	QLFHPEQLISGKEDAANNFAR	Gln->pyro-Glu (N-term Q)	2.000000000000000000000.0	97.99	1	790.405	2368.19	3	2367.16	1.033	1	6.5e-10
	TVGGGDDAFNTFFSETGAGK			88.14	2	659.959	1976.86	3	1976.88	-0.021	0	1.7e-08
	QLFHPEQLISGKEDAANNFAR			78.43	1	1193.11	2384.2	2	2384.19	0.01	1	4.4e-08
	AFHEQLSVAEITNSAFEPASMMAK	2 Oxidation (M)	0.000000000000000000004400.0	77.68	1	881.411	2641.21	3	2640.22	0.993	0	5.2e-08
	QLFHPEQLISGK			76.87	2	466.256	1395.75	3	1395.75	-0.005	0	8.6e-07
	IDHKFDLMYAK	Oxidation (M)	0.00000004000.0	72.22	1	698.843	1395.67	2	1395.69	-0.014	1	1.3e-05
	IHFMLSSYAPVISAEK	Oxidation (M)	0.0004000000000000.0	69.64	1	603.646	1807.91	3	1807.92	-0.003	0	4.5e-07
	EDAANNFAR			66.44	2	504.23	1006.44	2	1006.45	-0.002	0	7.4e-06
	EDLAALEK			61.08	1	444.736	887.458	2	887.46	-0.002	0	0.00019
	IDHKFDLMYAK	Oxidation (M)	0.00000004000.0	59.88	1	466.237	1395.69	3	1395.69	0.005	1	0.00024
	EIVDLCLDR			59.56	1	566.785	1131.56	2	1131.56	-0.005	0	0.00025
	DVNAAVGTIK			58.91	2	494.275	986.535	2	986.54	-0.004	0	5.5e-05
	LADNCTGLQGFLVFNAVGGGTGSGLGSLLLER			52.86	1	799.407	3193.6	4	3192.62	0.976	0	1.1e-05
	SLNIERPTYTNLNR			51.54	1	845.95	1689.88	2	1689.88	0.005	1	0.0012
	TIQFVDWCPTGFK			50.9	2	800.402	1598.79	2	1597.76	1.029	0	2.6e-05
	AVFVDLEPTVIDEVR			49.23	1	851.446	1700.88	2	1700.9	-0.022	0	0.0001
	YMACCLMYR	2 Oxidation (M)	0.040000400.0	44.84	1	650.252	1298.49	2	1298.49	-0.003	0	6.2e-05
	LSVDYGKK			44.03	1	455.254	908.493	2	908.497	-0.004	1	0.0011
	LVSQVISSLTASLR			41.98	1	491.956	1472.85	3	1472.86	-0.011	0	0.00058
	FDLMYAK	Oxidation (M)	0.0004000.0	41.82	1	452.218	902.421	2	902.421	0	0	0.0072
	QLFHPEQLISGK	Gln->pyro-Glu (N-term Q)	2.000000000000.0	39.18	1	690.367	1378.72	2	1378.72	-0.004	0	0.00087
	CGINYQPPTVVPGGDLAK			38.86	1	629.314	1884.92	3	1884.94	-0.02	0	0.00023
	LSVDYGK			37.37	1	391.207	780.4	2	780.402	-0.002	0	0.014
	EDLAALEK	Glu->pyro-Glu (N-term E)	3.00000000.0	36.11	1	436.244	870.474	2	869.449	1.024	0	0.15
	SLNIERPTYTNLNR			28.44	1	564.293	1689.86	3	1689.88	-0.022	1	0.0022
AT5G19770.1	29				40
	LADNCTGLQGFLVFNAVGGGTGSGLGSLLLER			168.75	1	1065.55	3193.63	3	3192.62	1.004	0	1.5e-16
	AVCMISNNTAVAEVFSR	Oxidation (M)	0.00040000000000000.0	114.81	1	942.948	1883.88	2	1883.89	-0.005	0	1.7e-11
	AVFVDLEPTVIDEVR			110.92	3	567.972	1700.89	3	1700.9	-0.004	0	8e-11
	SLDIERPTYTNLNR			106.28	2	564.627	1690.86	3	1690.86	-0.005	1	6.6e-09
	QLFHPEQLISGKEDAANNFAR	Gln->pyro-Glu (N-term Q)	2.000000000000000000000.0	97.99	1	790.405	2368.19	3	2367.16	1.033	1	6.5e-10
	LISQIISSLTTSLR			79.02	1	766.454	1530.89	2	1530.9	-0.005	0	1e-06
	QLFHPEQLISGKEDAANNFAR			78.43	1	1193.11	2384.2	2	2384.19	0.01	1	4.4e-08
	LISQIISSLTTSLR			78.18	6	511.305	1530.89	3	1530.9	-0.005	0	1.3e-06
	QLFHPEQLISGK			76.87	2	466.256	1395.75	3	1395.75	-0.005	0	8.6e-07
	IHFMLSSYAPVISAAK	Oxidation (M)	0.0004000000000000.0	76.68	1	875.952	1749.89	2	1749.91	-0.023	0	8.2e-08
	FDGAINVDITEFQTNLVPYPR			72.27	1	803.734	2408.18	3	2408.2	-0.02	0	1.7e-07
	IDHKFDLMYAK	Oxidation (M)	0.00000004000.0	72.22	1	698.843	1395.67	2	1395.69	-0.014	1	1.3e-05
	EDAANNFAR			66.44	2	504.23	1006.44	2	1006.45	-0.002	0	7.4e-06
	EDLAALEK			61.08	1	444.736	887.458	2	887.46	-0.002	0	0.00019
	IDHKFDLMYAK	Oxidation (M)	0.00000004000.0	59.88	1	466.237	1395.69	3	1395.69	0.005	1	0.00024
	EIVDLCLDR			59.56	1	566.785	1131.56	2	1131.56	-0.005	0	0.00025
	DVNAAVGTIK			58.91	2	494.275	986.535	2	986.54	-0.004	0	5.5e-05
	LADNCTGLQGFLVFNAVGGGTGSGLGSLLLER			52.86	1	799.407	3193.6	4	3192.62	0.976	0	1.1e-05
	AVFVDLEPTVIDEVR			49.23	1	851.446	1700.88	2	1700.9	-0.022	0	0.0001
	YMACCLMYR	2 Oxidation (M)	0.040000400.0	44.84	1	650.252	1298.49	2	1298.49	-0.003	0	6.2e-05
	LSVDYGKK			44.03	1	455.254	908.493	2	908.497	-0.004	1	0.0011
	FDLMYAK	Oxidation (M)	0.0004000.0	41.82	1	452.218	902.421	2	902.421	0	0	0.0072
	QLFHPEQLISGK	Gln->pyro-Glu (N-term Q)	2.000000000000.0	39.18	1	690.367	1378.72	2	1378.72	-0.004	0	0.00087
	TVQFVDWCPTGFK			39.15	1	792.877	1583.74	2	1583.74	-0.006	0	0.00075
	IHFMLSSYAPVISAAK	Oxidation (M)	0.0004000000000000.0	39.1	1	584.31	1749.91	3	1749.91	-0.004	0	0.00022
	CGINYQPPTVVPGGDLAK			38.86	1	629.314	1884.92	3	1884.94	-0.02	0	0.00023
	LSVDYGK			37.37	1	391.207	780.4	2	780.402	-0.002	0	0.014
	EDLAALEK	Glu->pyro-Glu (N-term E)	3.00000000.0	36.11	1	436.244	870.474	2	869.449	1.024	0	0.15
	AVCMISNNTAVAEVFSR			28.01	1	935.455	1868.89	2	1867.89	1.003	0	0.0032
AT1G04820.1	28				41
	LADNCTGLQGFLVFNAVGGGTGSGLGSLLLER			168.75	1	1065.55	3193.63	3	3192.62	1.004	0	1.5e-16
	FDGALNVDVTEFQTNLVPYPR			114.3	2	799.062	2394.16	3	2394.19	-0.022	0	1.1e-10
	AVFVDLEPTVIDEVR			110.92	3	567.972	1700.89	3	1700.9	-0.004	0	8e-11
	SLSIERPTYTNLNR			108.51	1	555.295	1662.86	3	1662.87	-0.005	1	2.6e-09
	LVSQVISSLTASLR			106.58	6	737.433	1472.85	2	1472.86	-0.006	0	2.5e-09
	QLFHPEQLISGKEDAANNFAR	Gln->pyro-Glu (N-term Q)	2.000000000000000000000.0	97.99	1	790.405	2368.19	3	2367.16	1.033	1	6.5e-10
	TVGGGDDAFNTFFSETGAGK			88.14	2	659.959	1976.86	3	1976.88	-0.021	0	1.7e-08
	QLFHPEQLISGKEDAANNFAR			78.43	1	1193.11	2384.2	2	2384.19	0.01	1	4.4e-08
	AFHEQLSVAEITNSAFEPASMMAK	2 Oxidation (M)	0.000000000000000000004400.0	77.68	1	881.411	2641.21	3	2640.22	0.993	0	5.2e-08
	QLFHPEQLISGK			76.87	2	466.256	1395.75	3	1395.75	-0.005	0	8.6e-07
	IDHKFDLMYAK	Oxidation (M)	0.00000004000.0	72.22	1	698.843	1395.67	2	1395.69	-0.014	1	1.3e-05
	IHFMLSSYAPVISAEK	Oxidation (M)	0.0004000000000000.0	69.64	1	603.646	1807.91	3	1807.92	-0.003	0	4.5e-07
	EDAANNFAR			66.44	2	504.23	1006.44	2	1006.45	-0.002	0	7.4e-06
	EDLAALEK			61.08	1	444.736	887.458	2	887.46	-0.002	0	0.00019
	IDHKFDLMYAK	Oxidation (M)	0.00000004000.0	59.88	1	466.237	1395.69	3	1395.69	0.005	1	0.00024
	EIVDLCLDR			59.56	1	566.785	1131.56	2	1131.56	-0.005	0	0.00025
	DVNAAVGTIK			58.91	2	494.275	986.535	2	986.54	-0.004	0	5.5e-05
	LADNCTGLQGFLVFNAVGGGTGSGLGSLLLER			52.86	1	799.407	3193.6	4	3192.62	0.976	0	1.1e-05
	TIQFVDWCPTGFK			50.9	2	800.402	1598.79	2	1597.76	1.029	0	2.6e-05
	AVFVDLEPTVIDEVR			49.23	1	851.446	1700.88	2	1700.9	-0.022	0	0.0001
	YMACCLMYR	2 Oxidation (M)	0.040000400.0	44.84	1	650.252	1298.49	2	1298.49	-0.003	0	6.2e-05
	LSVDYGKK			44.03	1	455.254	908.493	2	908.497	-0.004	1	0.0011
	LVSQVISSLTASLR			41.98	1	491.956	1472.85	3	1472.86	-0.011	0	0.00058
	FDLMYAK	Oxidation (M)	0.0004000.0	41.82	1	452.218	902.421	2	902.421	0	0	0.0072
	QLFHPEQLISGK	Gln->pyro-Glu (N-term Q)	2.000000000000.0	39.18	1	690.367	1378.72	2	1378.72	-0.004	0	0.00087
	CGINYQPPTVVPGGDLAK			38.86	1	629.314	1884.92	3	1884.94	-0.02	0	0.00023
	LSVDYGK			37.37	1	391.207	780.4	2	780.402	-0.002	0	0.014
	EDLAALEK	Glu->pyro-Glu (N-term E)	3.00000000.0	36.11	1	436.244	870.474	2	869.449	1.024	0	0.15
AT3G12780.1	28				49
	ADLNVPLDDNQTITDDTR			123.33	2	1008.47	2014.92	2	2014.94	-0.019	0	2.7e-12
	ELDYLVGAVSNPK			105.19	2	702.87	1403.72	2	1403.73	-0.005	0	3.1e-09
	ADDCIGPEVESLVASLPEGGVLLLENVR			101.65	1	738.629	2950.49	4	2950.5	-0.009	0	8.1e-10
	KLASLADLYVNDAFGTAHR			99.04	2	516.273	2061.06	4	2061.06	-0.002	1	7.6e-10
	AQGLSVGSSLVEEDKLELATELLAK			97.09	1	867.457	2599.35	3	2599.4	-0.047	1	7.9e-10
	FLKPSVAGFLLQK			87.36	6	483.291	1446.85	3	1446.86	-0.008	1	1.4e-07
	FAAGTEAIANK			87.32	2	546.786	1091.56	2	1091.56	-0.003	0	5.8e-07
	GVTTIIGGGDSVAAVEK			84.4	2	787.423	1572.83	2	1572.84	-0.004	0	6.3e-08
	SVGDLTSADLK			81.9	1	553.289	1104.56	2	1104.57	-0.002	0	1.9e-06
	LASLADLYVNDAFGTAHR			81.19	1	484.248	1932.96	4	1932.97	-0.008	0	3.7e-08
	LSELLGIEVTK			78.54	2	601.351	1200.69	2	1200.7	-0.009	0	3e-06
	RPFAAIVGGSK			73.63	1	551.813	1101.61	2	1101.63	-0.018	1	1.2e-05
	VILSTHLGRPK			70.97	1	610.874	1219.73	2	1219.74	-0.007	1	1.3e-06
	GVSLLLPTDVVVADKFAPDANSK			68.92	1	786.094	2355.26	3	2355.27	-0.009	1	4.3e-07
	IGVIESLLEK			68.57	3	550.827	1099.64	2	1099.65	-0.009	0	2.5e-05
	VILSTHLGR			67.88	1	498.297	994.579	2	994.592	-0.013	0	1.6e-05
	LASLADLYVNDAFGTAHR			62.03	2	645.336	1932.98	3	1932.97	0.015	0	1.5e-06
	VLPGVIALDEAIPVTV			60.04	2	803.473	1604.93	2	1604.94	-0.008	0	2.3e-06
	GVSLLLPTDVVVADK			58.43	2	763.439	1524.86	2	1524.88	-0.013	0	1.7e-05
	VGVAGVMSHISTGGGASLELLEGK	Oxidation (M)	0.000000400000000000000000.0	56.38	1	762.389	2284.15	3	2284.17	-0.027	0	0.0016
	ADLNVPLDDNQTITDDTR			54.18	2	672.99	2015.95	3	2014.94	1.004	0	1.2e-05
	FSLAPLVPR			52.88	4	500.797	999.579	2	998.591	0.988	0	0.00018
	AKGVSLLLPTDVVVADK			46.69	1	575.672	1723.99	3	1724.01	-0.014	1	4.2e-05
	AAIPTIK			45.95	2	357.23	712.446	2	712.448	-0.002	0	0.00042
	LAELSEK			45.43	1	395.219	788.424	2	788.428	-0.004	0	0.0096
	RPFAAIVGGSK			35.69	1	368.216	1101.63	3	1101.63	-0.003	1	0.012
	FYKEEEKNDPEFAK			34.4	1	444.214	1772.83	4	1772.83	0.001	2	0.017
	ELDYLVGAVSNPK			27.94	1	468.918	1403.73	3	1403.73	0.002	0	0.0046
AT3G13470.1	28				39
	EMTTIVGDGTTQEAVNKR	Oxidation (M)	0.040000000000000000.0	126.34	1	655.982	1964.92	3	1964.95	-0.024	1	1.4e-12
	GGYPILIIAEDIEQEALATLVVNK			122.3	1	857.47	2569.39	3	2568.41	0.984	0	3.4e-12
	DLVGVLEDAIR			101.2	1	400.559	1198.65	3	1198.66	-0.001	0	1.5e-08
	TNDLAGDGTTTSVVLAQGFIAEGVK			94.78	1	822.091	2463.25	3	2463.25	0.001	0	1.6e-09
	NLIEQAEQDYEKEK			94.12	1	868.922	1735.83	2	1735.83	0.004	1	1.2e-08
	IVNDGVTVAR			81	2	522.292	1042.57	2	1042.58	-0.007	0	1.8e-06
	LADLVGVTLGPK			78.14	1	591.856	1181.7	2	1181.7	-0.004	0	2e-07
	NAGVNGSVVSEK			76.52	2	580.794	1159.57	2	1159.58	-0.009	0	4.1e-07
	SAENNLYVVEGMQFDR	Oxidation (M)	0.0000000000040000.0	71.29	1	944.93	1887.85	2	1886.85	0.999	0	2.1e-07
	DLVGVLEDAIR			67.05	7	600.332	1198.65	2	1198.66	-0.007	0	4.1e-05
	GYISPYFVTDSEK			64.18	2	753.359	1504.7	2	1504.71	-0.006	0	1.5e-06
	EEVGLSLDK			63.4	1	495.259	988.504	2	988.508	-0.003	0	0.00013
	AAVEEGIVVGGGCTLLR			63.35	1	850.954	1699.89	2	1699.89	0	0	8.8e-06
	VVAAGANPVLITR			60.93	1	640.885	1279.76	2	1279.76	-0.006	0	8.3e-06
	VDAIKDTLENDEEK			55.76	1	540.269	1617.79	3	1617.77	0.012	1	7.8e-05
	CCLEHAASVAK			54.74	1	623.291	1244.57	2	1244.56	0.002	0	3.1e-05
	EVELEDPVENIGAK			51.36	2	771.388	1540.76	2	1540.76	-0.001	0	0.00014
	LRVEDALNATK			50.56	1	615.343	1228.67	2	1228.68	-0.006	1	0.00074
	SQYLDDIAILTGATVIR			49.9	1	617.336	1848.99	3	1848	0.988	0	2.1e-05
	NLIEQAEQDYEK			47.73	1	740.364	1478.71	2	1478.69	0.024	0	0.0041
	FGYNAATGK			45.64	1	464.727	927.44	2	927.445	-0.005	0	0.0035
	ALSYPLK			44.64	2	396.236	790.458	2	790.459	-0.001	0	0.0062
	NLIEQAEQDYEKEKLNER			43.22	1	750.37	2248.09	3	2248.1	-0.008	2	0.00031
	LLLVDKK			43.01	1	414.778	827.541	2	827.548	-0.007	1	0.0048
	ALVNELK			42.56	1	393.738	785.462	2	785.465	-0.002	0	0.0098
	NLIEQAEQDYEKEK			39.66	1	579.618	1735.83	3	1735.83	0.007	1	0.00039
	GVVTLEEGK			37.46	1	466.258	930.502	2	930.502	-0.001	0	0.005
	VEDALNATK			29.21	1	480.759	959.503	2	959.492	0.011	0	0.16
AT3G60750.1	28				48
	TPGHPENFETPGIEVTTGPLGQGIANAVGLALAEK			129.59	1	872.202	3484.78	4	3484.78	-0.006	0	7.1e-13
	VSIEAASTFGWGK			124.31	1	676.842	1351.67	2	1351.68	-0.008	0	4.7e-11
	SIGINSFGASAPAPLLYK			112.78	2	903.49	1804.96	2	1804.97	-0.008	0	4.6e-11
	VTTTIGYGSPNK			100.32	3	619.323	1236.63	2	1236.63	-0.004	0	1.3e-09
	HTPEGATLESDWSAK			99.04	1	814.877	1627.74	2	1627.75	-0.008	0	1.2e-09
	ANSYSVHGAALGEK			89.23	1	702.349	1402.68	2	1402.68	0	0	2.5e-08
	VVPGFLGGSADLASSNMTLLK	Oxidation (M)	0.000000000000000040000.0	88.99	2	698.369	2092.09	3	2092.09	-0.002	0	1.3e-07
	NGNTGYDEIR			85.46	2	569.758	1137.5	2	1137.51	-0.003	0	5.1e-08
	LPHLPGTSIEGVEK			82.23	1	492.935	1475.78	3	1475.8	-0.017	0	1.4e-06
	NLSQQCLNALAK			77.93	3	680.352	1358.69	2	1358.7	-0.008	0	2.8e-07
	ESVLPSDVSAR			75.72	1	580.299	1158.58	2	1158.59	-0.004	0	6.6e-06
	SIITGELPAGWEK			71.42	2	700.871	1399.73	2	1399.73	-0.008	0	1.2e-06
	ALPTYTPESPGDATR			61.19	3	788.384	1574.75	2	1574.76	-0.004	0	2.1e-06
	KYPEEASELK			61.16	2	597.305	1192.6	2	1192.6	-0.003	1	0.00021
	TPSILALSR			61.04	2	479.288	956.561	2	956.565	-0.005	0	0.00015
	KTPSILALSR			60.49	1	362.559	1084.66	3	1084.66	-0.005	1	0.0001
	NNLGWPYEPFQVPDDVK			57.12	1	673.323	2016.95	3	2016.96	-0.012	0	9.7e-06
	FEALGWHVIWVK			56.86	2	495.605	1483.79	3	1483.8	-0.005	0	3.8e-05
	EFGITVEAVVDAAK			55.07	2	725.381	1448.75	2	1447.76	0.992	0	1.5e-05
	KYPEEASELK			54.77	2	398.539	1192.6	3	1192.6	-0.003	1	0.00057
	PADGNETAGAYK			52.92	1	597.274	1192.53	2	1192.54	-0.002	0	5.2e-05
	TVTDKPTLIK			52.39	1	372.559	1114.65	3	1114.66	-0.005	1	0.00067
	QKLPHLPGTSIEGVEK			49.79	1	433.993	1731.94	4	1731.95	-0.01	1	0.00086
	FLAIDAVEK			47.91	5	503.282	1004.55	2	1004.55	-0.005	0	0.0039
	YPEEASELK			39.4	2	533.265	1064.52	2	1064.5	0.013	0	0.0043
	AFGDFQK			37.06	1	406.7	811.385	2	811.386	-0.002	0	0.024
	ANSYSVHGAALGEKEVEATR			30.22	1	697.007	2088	3	2088.02	-0.024	1	0.0038
	NPYWFNR			28.64	1	498.734	995.453	2	995.461	-0.008	0	0.011
AT1G07920.1	27				51
	MTPTKPMVVETFSEYPPLGR	2 Oxidation (M)	0.40000040000000000000.0	95.94	2	771.379	2311.11	3	2311.12	-0.009	1	7.1e-09
	EHALLAFTLGVK			85.39	1	649.872	1297.73	2	1297.74	-0.01	0	4.5e-07
	YDEIIKEVSSYLKK			82.69	1	429.485	1713.91	4	1713.92	-0.007	2	1.8e-08
	VETGMIKPGMVVTFAPTGLTTEVK	2 Oxidation (M)	0.000040000400000000000000.0	82.07	1	846.782	2537.32	3	2537.31	0.011	1	5.7e-08
	YYCTVIDAPGHR			81.14	2	484.561	1450.66	3	1450.67	-0.004	0	2.5e-08
	EHALLAFTLGVK			77.05	3	433.587	1297.74	3	1297.74	-0.001	0	2.3e-07
	IGGIGTVPVGR			73.88	5	513.302	1024.59	2	1024.6	-0.013	0	4.5e-06
	ARYDEIIKEVSSYLK			72.41	1	605.324	1812.95	3	1812.96	-0.011	2	1.3e-05
	QTVAVGVIK			72.16	4	457.786	913.557	2	913.56	-0.003	0	9.8e-06
	YDEIIKEVSSYLK			66.62	1	529.615	1585.82	3	1585.82	-0.001	1	1.7e-05
	GYVASNSKDDPAK			64.99	1	451.219	1350.64	3	1350.64	-0.005	1	3.2e-05
	EHALLAFTLGVK	Glu->pyro-Glu (N-term E)	3.000000000000.0	64.39	1	640.868	1279.72	2	1279.73	-0.006	0	8e-06
	VETGMIKPGMVVTFAPTGLTTEVK	Oxidation (M)	0.000040000000000000000000.0	63.55	1	841.439	2521.3	3	2521.32	-0.022	1	1.6e-05
	YDEIIKEVSSYLKK			57.26	1	572.315	1713.92	3	1713.92	0.005	2	4.3e-06
	LPLQDVYK			56.16	7	488.276	974.537	2	974.544	-0.007	0	0.00029
	STTTGHLIYK			51.73	3	374.204	1119.59	3	1119.59	-0.003	0	0.00012
	FHINIVVIGHVDSGK			49.7	1	409.48	1633.89	4	1633.89	-0.005	0	3.8e-05
	STNLDWYK			45.82	2	513.747	1025.48	2	1025.48	-0.003	0	0.00023
	MTPTKPMVVETFSEYPPLGR	2 Oxidation (M)	0.40000040000000000000.0	45.28	1	578.787	2311.12	4	2311.12	-0.005	1	5.7e-05
	FHINIVVIGHVDSGK			42.9	1	545.637	1633.89	3	1633.89	-0.006	0	9.5e-05
	ARYDEIIK			41.45	3	504.278	1006.54	2	1006.54	-0.003	1	0.019
	FSEILTK			41.25	1	419.238	836.46	2	836.464	-0.004	0	0.0059
	YYCTVIDAPGHRDFIK			36.88	1	489.489	1953.93	4	1953.94	-0.012	1	0.00077
	QTVAVGVIK	Gln->pyro-Glu (N-term Q)	2.000000000.0	36.78	1	449.273	896.531	2	896.533	-0.002	0	0.019
	MTPTKPMVVETFSEYPPLGR	Oxidation (M)	0.00000040000000000000.0	36.06	1	766.046	2295.11	3	2295.13	-0.013	1	0.00042
	EVSSYLK			35.2	3	413.218	824.421	2	824.428	-0.007	0	0.013
	STTTGHLIYK			27.42	1	560.801	1119.59	2	1119.59	-0.006	0	0.092
AT4G13940.1	27				45
	WCSCNIFSTQDHAAAAIAR			126.21	1	1089.99	2177.97	2	2177.97	-0.003	0	1.5e-12
	DQSDYVSIPIEGPYKPPHYR			119.76	2	591.041	2360.14	4	2360.14	-0.008	1	5.9e-12
	LVGVSEETTTGVKR			101.76	2	492.601	1474.78	3	1474.8	-0.017	1	2.6e-09
	LVGVSEETTTGVK			94.12	3	660.346	1318.68	2	1318.7	-0.021	0	4.9e-09
	ALDWGPGGGPDLIVDDGGDATLLIHEGVK			88.45	2	963.157	2886.45	3	2886.44	0.01	0	1.8e-08
	GETLQEYWWCTER			88.39	1	879.874	1757.73	2	1756.75	0.982	0	5.2e-09
	LYQMQQNGTLLFPAINVNDSVTK	Oxidation (M)	0.00040000000000000000000.0	81.64	2	871.119	2610.34	3	2609.32	1.02	0	2.8e-08
	TGQVPDPTSTDNPEFQIVLSIIK			78.98	2	833.768	2498.28	3	2498.29	-0.007	0	3.9e-08
	AGIIVLAEGR			78.53	2	499.801	997.588	2	997.592	-0.004	0	1.6e-06
	VAVICGYGDVGK			66.05	3	619.312	1236.61	2	1236.62	-0.007	0	2.5e-06
	WCSCNIFSTQDHAAAAIAR			65.93	1	727.328	2178.96	3	2177.97	0.99	0	6.6e-07
	EGLQVDPK			62.79	3	443.238	884.461	2	884.46	0	0	5.8e-05
	DSAAVFAWK			62.46	2	497.752	993.488	2	993.492	-0.004	0	1.5e-05
	TEFGPSQPFK			59.6	3	569.28	1136.55	2	1136.55	-0.004	0	5.7e-05
	ITIKPQTDR			58.75	1	536.309	1070.6	2	1070.61	-0.005	1	0.00026
	ATDVMIAGK	Oxidation (M)	0.000040000.0	53.5	2	461.237	920.46	2	920.464	-0.004	0	4.6e-05
	DIIMVDHMR	2 Oxidation (M)	0.000400040.0	52.4	1	581.283	1160.55	2	1160.53	0.02	0	8.5e-05
	SKFDNLYGCR			51.3	2	630.296	1258.58	2	1258.58	0.001	1	4.8e-05
	ITGSLHMTIQTAVLIETLTALGAEVR	Oxidation (M)	0.00000040000000000000000000.0	49.8	1	689.371	2753.46	4	2753.5	-0.043	0	2.1e-05
	VKDMSQADFGR	Oxidation (M)	0.00040000000.0	46.51	1	423.868	1268.58	3	1268.58	-0.001	1	0.00033
	RITIKPQTDR			44.29	1	409.909	1226.71	3	1226.71	-0.003	2	0.00053
	KVYVLPK			41.88	1	423.775	845.536	2	845.537	-0.001	1	0.0029
	AEEIFEK			41.64	1	433.217	864.42	2	864.423	-0.003	0	0.015
	ALDWGPGGGPDLIVDDGGDATLLIHEGVK			41.09	1	722.606	2886.39	4	2886.44	-0.046	0	0.00014
	GETLQEYWWCTER			40.61	1	586.587	1756.74	3	1756.75	-0.013	0	0.00016
	DQSDYVSIPIEGPYKPPHYR			36.49	2	787.725	2360.15	3	2360.14	0.009	1	0.00038
	HSLPDGLMR	Oxidation (M)	0.000000040.0	35.26	1	521.259	1040.5	2	1040.51	-0.004	0	0.014
AT1G62020.1	26				29
	SPPALVYDFSQLDEK			86.1	1	854.916	1707.82	2	1707.84	-0.018	0	3.9e-08
	LLETSPVDSQAK			81.29	1	644.346	1286.68	2	1286.67	0.006	0	4.2e-07
	VSGNTIFCLDR			80.43	1	641.314	1280.61	2	1280.62	-0.006	0	2.3e-07
	QDIIVSNSEDK			79.89	2	624.312	1246.61	2	1246.6	0.005	0	6.2e-06
	ERPAFALSGDSLFYAK			78.43	1	591.296	1770.87	3	1770.89	-0.029	1	6.2e-07
	NNVMGQFHNALYLGDVK	Oxidation (M)	0.00040000000000000.0	76.54	1	646	1934.98	3	1934.93	0.047	0	6.7e-08
	LVLGELQTPFVR			75.85	1	686.4	1370.79	2	1370.79	-0.007	0	4e-06
	QGNSGIVEFAYQQTK			73.24	1	835.425	1668.83	2	1668.81	0.024	0	2.4e-07
	GTGGSAVFIAR			72.48	1	518.281	1034.55	2	1034.55	-0.003	0	4.2e-06
	SEDKVVIFDLQQR			71.25	1	526.282	1575.82	3	1575.83	-0.002	1	2.6e-06
	CLFTLLGHLDYIR			65.55	2	540.953	1619.84	3	1619.85	-0.014	0	2.3e-05
	LVLQCTLHETIR			65.34	1	741.903	1481.79	2	1481.8	-0.011	0	8e-06
	LSFLYLITGNLDK			65.29	2	748.92	1495.83	2	1495.83	-0.004	0	4.8e-05
	LGVEALR			63.74	1	379.231	756.447	2	756.449	-0.002	0	6.4e-05
	TLDVPIYITK			52.51	1	582.339	1162.66	2	1161.66	0.999	0	0.00024
	GFPEVALHFVEDERIR			44.98	1	479.497	1913.96	4	1912.98	0.978	1	6.1e-05
	YCLPNGDSGIIR			42.41	1	682.839	1363.66	2	1363.65	0.007	0	0.00016
	GWSESSSPNVR			41.33	1	603.788	1205.56	2	1204.55	1.015	0	0.0011
	GFPEVALHFVEDER			40.99	1	548.939	1643.8	3	1643.79	0.001	0	0.00014
	DSQVIPIR			37.56	1	464.264	926.513	2	926.519	-0.005	0	0.0079
	RLLETSPVDSQAK			36.7	1	722.389	1442.76	2	1442.77	-0.01	1	0.001
	SPLPIPTDAIFYAGTGNLLCR			36.01	1	759.386	2275.14	3	2275.17	-0.03	0	0.00042
	RPGTPSLNQSPR			33.51	1	655.344	1308.67	2	1308.69	-0.016	1	0.004
	LATELGDNVPSLPEGK			33.29	1	820.414	1638.81	2	1638.85	-0.034	0	0.00076
	VSGNTIFCLDRDGK			32.72	1	527.925	1580.75	3	1580.76	-0.007	1	0.00085
	EDLVVSASLDQTVR			28.76	1	766.405	1530.8	2	1530.79	0.007	0	0.021
AT4G20360.1	26				46
	QTELPFLLAVEDVFSITGR			139.94	3	712.382	2134.12	3	2134.13	-0.007	0	1e-13
	TTLTAALTMALASIGSSVAK	Oxidation (M)	0.00000000400000000000.0	131.95	3	641.685	1922.03	3	1922.04	-0.006	0	5.9e-13
	TTLTAALTMALASIGSSVAK			120.25	1	636.353	1906.04	3	1906.04	-0.008	0	1.8e-11
	ELLSSYEFNGDDIPIISGSALLAVETLTENPK			113.59	1	1145.95	3434.82	3	3434.73	0.08	0	2.2e-11
	GITINTATVEYETENR			101.3	1	905.942	1809.87	2	1809.87	-0.005	0	3.2e-10
	ILDEALAGDNVGLLLR			98.04	4	561.319	1680.93	3	1680.94	-0.006	0	1.6e-08
	KPHVNIGTIGHVDHGK			98.01	1	427.986	1707.91	4	1707.92	-0.002	1	3.1e-09
	ILDEALAGDNVGLLLR			97.61	3	841.474	1680.93	2	1680.94	-0.008	0	1.8e-09
	VGETVDLVGLR			96.9	3	579.328	1156.64	2	1156.64	-0.004	0	4.3e-08
	YDEIDAAPEER			72.42	2	654.29	1306.57	2	1306.57	-0.002	0	1.1e-06
	HYAHVDCPGHADYVK			71.6	1	442.954	1767.79	4	1767.78	0.007	0	1.9e-07
	SYTVTGVEMFQK	Oxidation (M)	0.000000004000.0	69.59	2	703.337	1404.66	2	1404.66	0.001	0	3e-07
	PGSITPHTKFEAIIYVLK			67.89	1	504.288	2013.12	4	2013.13	-0.008	1	4.6e-06
	KYDEIDAAPEER			65.82	2	479.236	1434.68	3	1434.66	0.023	1	4.2e-05
	SYTVTGVEMFQK			60.79	1	695.343	1388.67	2	1388.66	0.006	0	2e-06
	VGETVDLVGLRETR			53.88	1	515.285	1542.83	3	1542.84	-0.003	1	0.00026
	TVGAGVIGTILE			52.56	4	565.324	1128.63	2	1128.64	-0.005	0	0.00056
	IVVELIVPVACEQGMR	Oxidation (M)	0.0000000000000040.0	51.95	1	610.656	1828.94	3	1827.96	0.986	0	1.3e-05
	QVGVPDMVVFLNK	Oxidation (M)	0.0000004000000.0	51.87	1	731.889	1461.76	2	1460.77	0.994	0	0.00044
	IMNDKDEESKMVMPGDR	3 Oxidation (M)	0.04000000004040000.0	48.96	1	511.475	2041.87	4	2041.88	-0.005	2	2.6e-05
	QTELPFLLAVEDVFSITGR	Gln->pyro-Glu (N-term Q)	2.0000000000000000000.0	47.51	1	1060.07	2118.13	2	2117.1	1.028	0	0.00037
	EHILLAK			46.67	1	412.248	822.482	2	822.496	-0.014	0	0.0019
	KKPHVNIGTIGHVDHGK			45.35	1	368.21	1836.01	5	1836.01	0.001	2	5.6e-05
	FEAIIYVLK			43.78	4	548.324	1094.63	2	1094.64	-0.003	0	0.00083
	IYELMDAVDDYIPIPQR	Oxidation (M)	0.00004000000000000.0	34.79	1	689.669	2065.98	3	2066	-0.019	0	0.0006
	HSPFFAGYR			28.24	1	541.262	1080.51	2	1080.51	-0.006	0	0.0039
AT1G42970.1	25				52
	VPTPNVSVVDLVINVEKK			152.95	3	651.035	1950.08	3	1949.12	0.964	1	4.6e-15
	GILDVCDAPLVSVDFR			118.76	2	888.448	1774.88	2	1774.89	-0.01	0	2.4e-11
	VPTPNVSVVDLVINVEK			113.96	1	911.515	1821.02	2	1821.03	-0.009	0	3e-11
	KGLTAEDVNEAFR			113.43	1	725.373	1448.73	2	1448.73	0.005	1	1.3e-09
	GILDVCDAPLVSVDFR			110.75	1	592.637	1774.89	3	1774.89	-0.002	0	5e-11
	DSPLEVVVLNDSGGVK			90.87	2	814.428	1626.84	2	1626.85	-0.006	0	2e-07
	IVDNETISVDGK			90.52	4	645.33	1288.65	2	1288.65	-0.005	0	1.7e-07
	VVAWYDNEWGYSQR			88.05	1	886.902	1771.79	2	1771.8	-0.006	0	5.5e-09
	AAALNIVPTSTGAAK			85.8	4	692.891	1383.77	2	1383.77	-0.005	0	8.1e-08
	VVDLAHLVASK			74.19	2	384.563	1150.67	3	1150.67	-0.004	0	1.5e-07
	VIITAPAK			71.64	3	406.765	811.515	2	811.517	-0.001	0	3e-06
	GLTAEDVNEAFRK			70.28	2	483.914	1448.72	3	1448.73	-0.006	1	2.2e-06
	VLDEEFGIVK			66.18	4	574.811	1147.61	2	1147.61	-0.005	0	7e-05
	YDSMLGTFK	Oxidation (M)	0.000400000.0	65.85	1	539.248	1076.48	2	1076.48	-0.004	0	3.3e-06
	KGLTAEDVNEAFRK			65.66	1	789.413	1576.81	2	1576.82	-0.009	2	2.2e-06
	VPTPNVSVVDLVINVEK			60.7	1	608.013	1821.02	3	1821.03	-0.009	0	3.3e-06
	AVSLVLPQLK			55.97	3	534.343	1066.67	2	1066.67	-0.004	0	8.5e-05
	VAINGFGR			55.17	4	417.234	832.453	2	832.456	-0.002	0	0.00098
	LNGIALR			53.34	4	378.739	755.463	2	755.465	-0.002	0	0.00062
	KDSPLEVVVLNDSGGVK			52.77	1	585.987	1754.94	3	1754.94	-0.003	1	0.00089
	GTMTTTHSYTGDQR	Oxidation (M)	0.00400000000000.0	52.47	3	524.561	1570.66	3	1570.67	-0.006	0	1.4e-05
	TNPADEECKVYD			46.7	1	721.311	1440.61	2	1439.59	1.02	1	4.2e-05
	WPGAEAVGSGDPLEDFCK			45.51	1	645.618	1933.83	3	1933.85	-0.021	0	5.4e-05
	VVDLAHLVASK			33.13	1	576.343	1150.67	2	1150.67	0.001	0	0.00078
	VVAWYDNEWGYSQR			32.45	1	591.604	1771.79	3	1771.8	-0.005	0	0.002
AT2G28000.1	25				33
	TNDSAGDGTTTASILAR			141.38	1	825.893	1649.77	2	1649.79	-0.014	0	1.8e-13
	APLLIIAEDVTGEALATLVVNK			132.63	2	750.767	2249.28	3	2249.29	-0.01	0	3.7e-13
	AIELPNAMENAGAALIR	Oxidation (M)	0.00000004000000000.0	129.93	1	885.45	1768.88	2	1768.91	-0.03	0	2.1e-12
	DSTTLIADAASKDELQAR			128.05	1	635.652	1903.93	3	1903.95	-0.013	1	2.9e-11
	VGAATETELEDR			120.83	2	645.808	1289.6	2	1289.61	-0.008	0	1.5e-10
	ALLSPAALIAQNAGVEGEVVVEK			94.83	2	760.413	2278.22	3	2277.26	0.961	0	7.1e-09
	ITAIKDIIPILEK			88.59	2	489.642	1465.9	3	1465.91	-0.009	1	2.8e-08
	VVNDGVTIAR			83.38	2	522.293	1042.57	2	1042.58	-0.005	0	5.1e-07
	LGADIVQK			75.67	1	422.247	842.48	2	842.486	-0.007	0	5.1e-06
	LADCVGLTLGPR			73.44	1	636.336	1270.66	2	1270.67	-0.013	0	5.2e-07
	GYISPQFVTNPEK			72.86	1	740.364	1478.71	2	1478.74	-0.027	0	8.2e-07
	ELFETDSVYDSEK			71.05	1	781.338	1560.66	2	1560.68	-0.021	0	2.2e-07
	HGLLSVTSGANPVSLK			70.48	1	527.295	1578.86	3	1578.87	-0.009	0	3.1e-07
	AALQAGIDK			65.98	1	443.748	885.481	2	885.492	-0.011	0	6.8e-06
	ELFETDSVYDSEKLAER			63.84	2	677.665	2029.97	3	2029.95	0.024	1	4e-06
	LSGGVAVIK			62.32	1	422.263	842.511	2	842.523	-0.011	0	0.0001
	NVVLDEFGSPK			60.34	1	602.819	1203.62	2	1203.61	0.01	0	1e-05
	LLAEFENAR			55.56	1	531.782	1061.55	2	1061.55	-0.001	0	6.7e-05
	TVQGLIEELQKK			54.5	1	462.605	1384.79	3	1384.79	0.001	1	0.00011
	ETFEDADER			47.63	1	556.242	1110.47	2	1110.45	0.023	0	0.00075
	GVLNVVAVK			47.29	2	449.787	897.559	2	897.565	-0.006	0	0.0016
	TVQGLIEELQK			42.86	1	629.351	1256.69	2	1256.7	-0.01	0	0.0012
	VLITDQK			38.36	1	408.742	815.469	2	815.475	-0.006	0	0.046
	DIIPILEK			34.54	2	470.788	939.562	2	939.564	-0.002	0	0.032
	AIELPNAMENAGAALIR	Oxidation (M)	0.00000004000000000.0	28.3	1	590.981	1769.92	3	1768.91	1.007	0	0.0022
AT3G52930.1	25				36
	GTVELAGTDGETTTQGLDGLGDR			136.8	1	1132.04	2262.06	2	2262.06	-0.001	0	3.7e-12
	LASINVENVETNR			112.62	1	729.884	1457.75	2	1457.75	0.007	0	3.3e-11
	TVPAAVPAIVFLSGGQSEEEATR			99.18	3	777.071	2328.19	3	2328.2	-0.006	0	5e-10
	GILAADESTGTIGKR			98.37	2	496.937	1487.79	3	1487.79	-0.007	1	4e-08
	ALSDHHVLLEGTLLKPNMVTPGSDSPK	Oxidation (M)	0.000000000000000004000000000.0	95.86	1	718.871	2871.46	4	2871.48	-0.024	1	1e-09
	IGENEPSEHSIHENAYGLAR			92.79	1	741.68	2222.02	3	2222.03	-0.016	0	3.8e-09
	GILAADESTGTIGK			85.46	2	666.851	1331.69	2	1331.69	-0.006	0	8.8e-07
	TVPAAVPAIVFLSGGQSEEEATR			85.23	1	1165.1	2328.19	2	2328.2	-0.006	0	1.4e-08
	ANSEATLGTYK			81.63	1	577.785	1153.56	2	1153.56	-0.006	0	1.2e-07
	TVPAAVPAIVFLSGGQSEEEATR			77.26	1	583.058	2328.2	4	2328.2	0.006	0	5.7e-08
	FADELIANAAYIGTPGK			76.19	3	584.303	1749.89	3	1749.89	-0.008	0	7.2e-08
	VSPEVIAEHTVR			75.13	1	668.859	1335.7	2	1335.71	-0.012	0	6.7e-07
	AAQEALYVR			72.51	1	510.777	1019.54	2	1019.54	-0.001	0	2.6e-06
	VDKGTVELAGTDGETTTQGLDGLGDR			66.47	1	869.089	2604.24	3	2604.25	-0.007	1	4.5e-05
	LGDGAAESLHVK			66.19	1	399.549	1195.63	3	1195.62	0.006	0	8.8e-06
	GILAADESTGTIGKR			62.55	1	744.897	1487.78	2	1487.79	-0.014	1	0.00015
	ELLFTAPGALPCLSGVILFEETLYQK			57.05	1	970.505	2908.49	3	2908.53	-0.036	0	0.001
	KPWSLSFSFGR			55.58	1	656.339	1310.66	2	1310.68	-0.013	1	8.6e-05
	VSPEVIAEHTVR			54.04	1	446.244	1335.71	3	1335.71	-0.005	0	3.6e-05
	EGGVLPGIK			53.75	2	435.257	868.499	2	868.502	-0.003	0	0.00018
	TKKPWSLSFSFGR			47.52	1	514.276	1539.81	3	1539.82	-0.013	2	0.00017
	VLAACYK			45.51	1	412.719	823.424	2	823.426	-0.003	0	0.00031
	LASINVENVETNRR			44.91	1	538.954	1613.84	3	1613.85	-0.007	1	0.00039
	LFVDILK			43.16	5	424.266	846.517	2	846.521	-0.005	0	0.0057
	NLNAMNQLK	Oxidation (M)	0.000040000.0	36.55	1	531.273	1060.53	2	1060.53	-0.002	0	0.0015
AT5G62690.1	25				70
	GHYTEGAELIDSVLDVVR			136.8	4	658.337	1971.99	3	1971.99	-0.002	0	8e-12
	GHYTEGAELIDSVLDVVRK			126.3	2	526.027	2100.08	4	2100.09	-0.008	1	1.5e-12
	FWEVVCAEHGIDPTGR			121.49	1	624.963	1871.87	3	1871.86	0.005	0	3.1e-11
	GHYTEGAELIDSVLDVVR			120.21	1	494.257	1973	4	1971.99	1.007	0	1.1e-10
	EILHIQGGQCGNQIGAK			94.09	1	608.312	1821.91	3	1821.92	-0.002	0	4.9e-09
	EVDEQMLNVQNK	Oxidation (M)	0.000004000000.0	79.26	2	731.847	1461.68	2	1461.68	0.002	0	1e-07
	MMLTFSVFPSPK	2 Oxidation (M)	0.440000000000.0	73.53	2	709.339	1416.66	2	1415.68	0.981	0	1.3e-07
	LHFFMVGFAPLTSR	Oxidation (M)	0.00004000000000.0	71.3	11	546.949	1637.83	3	1637.84	-0.013	0	1.1e-06
	SGPYGQTFRPDNFVFGQSGAGNNWAK			70.76	1	935.097	2802.27	3	2801.3	0.975	1	2.3e-07
	INVYYNEASCGR			70.12	2	723.844	1445.67	2	1444.64	1.033	0	6.1e-07
	VSEQFTAMFR	Oxidation (M)	0.0000000400.0	69.77	3	616.29	1230.57	2	1230.57	-0.004	0	2.3e-06
	FPGQLNSDLR			63.47	3	573.797	1145.58	2	1145.58	-0.004	0	1.3e-05
	VSEQFTAMFR			62.97	2	608.307	1214.6	2	1214.58	0.023	0	5.9e-06
	AVLMDLEPGTMDSLR	2 Oxidation (M)	0.000400000040000.0	59.78	3	840.405	1678.8	2	1678.79	0.005	0	2.5e-06
	KLAVNLIPFPR			59.31	1	634.393	1266.77	2	1266.78	-0.011	1	1.9e-05
	FPGQLNSDLRK			58.54	4	425.565	1273.67	3	1273.68	-0.005	1	2.1e-05
	LAVNLIPFPR			57.98	14	570.347	1138.68	2	1138.69	-0.006	0	9.5e-05
	LHFFMVGFAPLTSR			55.13	1	541.616	1621.83	3	1621.84	-0.018	0	0.00062
	NSSYFVEWIPNNVK			54.94	2	848.918	1695.82	2	1695.83	-0.005	0	8.3e-06
	SLTVPELTQQMolecular weightDSK	Oxidation (M)	0.000000000040000.0	52.28	1	889.929	1777.84	2	1777.86	-0.013	0	1.3e-05
	FPGQLNSDLRK			50.23	1	637.841	1273.67	2	1273.68	-0.011	1	0.00022
	STVCDIPPTGLK			48.35	4	644.834	1287.65	2	1286.65	1	0	9.3e-05
	IREEYPDR			45.84	2	359.848	1076.52	3	1076.53	-0.002	1	0.002
	YLTASAMFR			35.27	1	530.268	1058.52	2	1058.52	-0.001	0	0.0037
	YLTASAMFR	Oxidation (M)	0.000000400.0	33.79	1	538.266	1074.52	2	1074.52	0.001	0	0.0029
AT1G56410.1	24				63
	IINEPTAAAIAYGLDKK			127.26	10	596.667	1786.98	3	1786.98	-0.004	1	3.2e-12
	NQVAMNPVNTVFDAKR	Oxidation (M)	0.0000400000000000.0	123.64	1	607.307	1818.9	3	1818.9	-0.004	1	4.2e-12
	ATAGDTHLGGEDFDNR			119.17	4	559.248	1674.72	3	1674.72	-0.001	0	6.7e-12
	GEGPAIGIDLGTTYSCVGVWQHDR			116.76	1	863.413	2587.22	3	2587.21	0.006	0	1.1e-11
	ATAGDTHLGGEDFDNR			116.41	1	838.37	1674.72	2	1674.72	0.001	0	3.2e-11
	SINPDEAVAYGAAVQAAILSGEGNEK			115.45	2	858.759	2573.25	3	2573.26	-0.007	0	1.5e-11
	IINEPTAAAIAYGLDKK			96.88	1	894.496	1786.98	2	1786.98	-0.005	1	1.4e-09
	IINEPTAAAIAYGLDK			96.48	2	830.446	1658.88	2	1658.89	-0.011	0	1.7e-09
	NQVAMNPVNTVFDAK	Oxidation (M)	0.000040000000000.0	92.33	3	832.413	1662.81	2	1662.8	0.007	0	2.2e-09
	TTPSYVAFTDSER			82.06	5	737.348	1472.68	2	1472.68	0.002	0	4.7e-07
	VEIIANDQGNR			80.56	4	614.814	1227.61	2	1227.62	-0.007	0	2.9e-07
	VQQLLQDFFNGKELCK			79.04	1	656.665	1966.97	3	1966	0.975	1	9.1e-08
	NAVVTVPAYFNDSQR			73.51	4	840.919	1679.82	2	1679.83	-0.004	0	1.3e-07
	MVNHFVQEFKR	Oxidation (M)	0.40000000000.0	72.74	1	363.437	1449.72	4	1449.72	-0.002	1	5.7e-07
	MVNHFVQEFKR	Oxidation (M)	0.40000000000.0	71.76	1	484.245	1449.71	3	1449.72	-0.006	1	3.6e-05
	VQQLLQDFFNGK			68.14	9	718.878	1435.74	2	1435.75	-0.005	0	2.6e-05
	NQVAMNPVNTVFDAK			62.66	2	824.408	1646.8	2	1646.81	-0.007	0	1.3e-06
	MVNHFVQEFK	Oxidation (M)	0.4000000000.0	60.1	3	432.212	1293.62	3	1293.62	-0.002	0	4.1e-05
	DAGVIAGLNVLR			53.81	1	599.346	1196.68	2	1196.69	-0.01	0	0.00021
	NAVVTVPAYFNDSQR			41.09	2	561.28	1680.82	3	1679.83	0.993	0	0.00014
	VQQLLQDFFNGK			38.75	2	479.587	1435.74	3	1435.75	-0.006	0	0.00023
	IPKVQQLLQDFFNGK			35.55	1	592.326	1773.95	3	1773.98	-0.023	1	0.038
	MVNHFVQEFK	Oxidation (M)	0.4000000000.0	30.93	1	647.822	1293.63	2	1293.62	0.013	0	0.0019
	QFAAEEISSMVLIK			28.29	1	522.613	1564.82	3	1564.82	0.001	0	0.027
AT3G01500.1	24				65
	VEQITAALQTGTSSDKK			121.08	1	592.98	1775.92	3	1775.93	-0.008	1	7.4e-11
	VISELGDSAFEDQCGR			117.17	2	892.402	1782.79	2	1781.79	1	0	1e-11
	EAVNVSLANLLTYPFVR			115.37	1	953.523	1905.03	2	1905.04	-0.004	0	6.3e-11
	YGGVGAAIEYAVLHLK			108.64	20	554.303	1659.89	3	1659.9	-0.011	0	6.5e-11
	VEQITAALQTGTSSDK			105.35	1	824.914	1647.81	2	1647.83	-0.017	0	2.1e-10
	GTEAYDEAIEALKK	Acetyl (Protein N-term)	1.00000000000000.0	88.77	1	790.901	1579.79	2	1578.78	1.009	1	5.4e-09
	VENIVVIGHSACGGIK			85.39	1	826.942	1651.87	2	1651.87	-0.003	0	2.8e-07
	EAVNVSLANLLTYPFVR			82.47	8	636.347	1906.02	3	1905.04	0.983	0	3.5e-08
	GLMSFPLDGNNSTDFIEDWVK	Oxidation (M)	0.004000000000000000000.0	81.5	3	801.038	2400.09	3	2400.09	-0.003	0	2.3e-08
	VENIVVIGHSACGGIK			81.17	1	551.629	1651.87	3	1651.87	-0.006	0	7.4e-08
	EKYETNPALYGELAK			75.9	3	575.959	1724.86	3	1724.86	-0.007	1	6.5e-07
	EAVNVSLANLLTYPFVR	Glu->pyro-Glu (N-term E)	3.00000000000000000.0	72.52	1	630.006	1887	3	1887.03	-0.029	0	3e-07
	VCPSHVLDFQPGDAFVVR			69.38	1	681.673	2042	3	2042	-0.008	0	1.3e-06
	YETNPALYGELAK			68.5	3	734.867	1467.72	2	1467.72	-0.005	0	1.2e-06
	NIANMVPPFDK	Oxidation (M)	0.00004000000.0	62.5	3	631.315	1260.62	2	1260.62	-0.002	0	9.6e-06
	GTLALKGGYYDFVK			60.54	1	511.271	1530.79	3	1530.81	-0.016	1	3.1e-06
	KAFDPVETIK			55.06	1	383.222	1146.64	3	1146.63	0.015	1	0.0005
	YMVFACSDSR	Oxidation (M)	0.0400000000.0	52.31	2	626.256	1250.5	2	1250.51	-0.008	0	1.2e-05
	AFDPVETIK			48.63	2	510.272	1018.53	2	1018.53	-0.003	0	0.0042
	GGYYDFVK			48.08	3	474.726	947.437	2	947.439	-0.002	0	0.00036
	NIANMVPPFDKVK	Oxidation (M)	0.0000400000000.0	45.56	2	496.93	1487.77	3	1487.78	-0.012	1	5.3e-05
	YMVFACSDSR			42.39	2	618.265	1234.52	2	1234.51	0.005	0	0.00025
	LLIEKEELK			37.55	1	557.837	1113.66	2	1113.66	-0.004	1	0.029
	NIANMVPPFDK			34.87	1	623.323	1244.63	2	1244.62	0.01	0	0.0019
AT5G23860.1	24				66
	GHYTEGAELIDSVLDVVR			136.8	4	658.337	1971.99	3	1971.99	-0.002	0	8e-12
	GHYTEGAELIDSVLDVVRK			126.3	2	526.027	2100.08	4	2100.09	-0.008	1	1.5e-12
	GHYTEGAELIDSVLDVVR			120.21	1	494.257	1973	4	1971.99	1.007	0	1.1e-10
	EILHIQGGQCGNQIGAK			94.09	1	608.312	1821.91	3	1821.92	-0.002	0	4.9e-09
	EVDEQMINVQNK	Oxidation (M)	0.000004000000.0	79.26	2	731.847	1461.68	2	1461.68	0.002	0	1e-07
	MMLTFSVFPSPK	2 Oxidation (M)	0.440000000000.0	73.53	2	709.339	1416.66	2	1415.68	0.981	0	1.3e-07
	LHFFMVGFAPLTSR	Oxidation (M)	0.00004000000000.0	71.3	11	546.949	1637.83	3	1637.84	-0.013	0	1.1e-06
	SGPYGQIFRPDNFVFGQSGAGNNWAK			69.98	1	939.115	2814.32	3	2813.33	0.992	1	2.7e-07
	VSEQFTAMFR	Oxidation (M)	0.0000000400.0	69.77	3	616.29	1230.57	2	1230.57	-0.004	0	2.3e-06
	AVLMDLEPGTMDSVR	2 Oxidation (M)	0.000400000040000.0	69.28	1	833.395	1664.78	2	1664.78	0	0	1.4e-06
	VNVYYNEASCGR			67.69	1	716.322	1430.63	2	1430.62	0.005	0	4.5e-07
	FPGQLNSDLR			63.47	3	573.797	1145.58	2	1145.58	-0.004	0	1.3e-05
	VSEQFTAMFR			62.97	2	608.307	1214.6	2	1214.58	0.023	0	5.9e-06
	KLAVNLIPFPR			59.31	1	634.393	1266.77	2	1266.78	-0.011	1	1.9e-05
	FPGQLNSDLRK			58.54	4	425.565	1273.67	3	1273.68	-0.005	1	2.1e-05
	LAVNLIPFPR			57.98	14	570.347	1138.68	2	1138.69	-0.006	0	9.5e-05
	LHFFMVGFAPLTSR			55.13	1	541.616	1621.83	3	1621.84	-0.018	0	0.00062
	NSSYFVEWIPNNVK			54.94	2	848.918	1695.82	2	1695.83	-0.005	0	8.3e-06
	FPGQLNSDLRK			50.23	1	637.841	1273.67	2	1273.68	-0.011	1	0.00022
	STVCDIPPTGLK			48.35	4	644.834	1287.65	2	1286.65	1	0	9.3e-05
	IREEYPDR			45.84	2	359.848	1076.52	3	1076.53	-0.002	1	0.002
	YQGENDLQLER			44.26	1	682.829	1363.64	2	1363.64	0.007	0	7.1e-05
	YLTASAMFR			35.27	1	530.268	1058.52	2	1058.52	-0.001	0	0.0037
	YLTASAMFR	Oxidation (M)	0.000000400.0	33.79	1	538.266	1074.52	2	1074.52	0.001	0	0.0029
ATCG00120.1	24				45
	TNKPQFQEIIASTK			120.4	2	535.624	1603.85	3	1603.86	-0.007	1	3.6e-11
	ASSVAQVVTSLQER			113.99	2	737.894	1473.77	2	1473.78	-0.005	0	1.1e-10
	EVTIVNTGTVLQVGDGIAR			113.07	1	971.524	1941.03	2	1941.05	-0.02	0	4e-11
	SVYEPLQTGLIAIDSMIPIGR	Oxidation (M)	0.000000000000000400000.0	111.72	2	763.743	2288.21	3	2288.21	-0.001	0	3.6e-11
	TLTAEAESFLKEGIQEQLER			105.77	1	573.794	2291.15	4	2291.16	-0.019	1	1.2e-10
	SVYEPLQTGLIAIDSMIPIGR			97.13	1	758.411	2272.21	3	2272.21	-0.001	0	1.4e-08
	EGIQEQLER			80.73	4	551.279	1100.54	2	1100.55	-0.003	0	1.4e-06
	TLTAEAESFLK			76.41	4	605.317	1208.62	2	1208.63	-0.01	0	1.9e-06
	EAYPGDVFYLHSR			75.79	1	518.584	1552.73	3	1552.73	-0.001	0	1.2e-07
	EAYPGDVFYLHSR			71.93	3	777.373	1552.73	2	1552.73	0.001	0	4.9e-07
	LIESPAPGIISR			71.48	3	626.858	1251.7	2	1251.72	-0.016	0	9.4e-06
	TLTAEAESFLKEGIQEQLER			70.81	1	764.726	2291.16	3	2291.16	-0.008	1	2.3e-07
	ADEISNIIR			69.33	2	515.778	1029.54	2	1029.55	-0.004	0	2.8e-05
	IAQIPVSEAYLGR			69.09	2	708.893	1415.77	2	1415.78	-0.007	0	9.8e-06
	VINALANPIDGR			68.48	4	626.858	1251.7	2	1251.69	0.008	0	1.9e-05
	EQHTLIIYDDLSK			56.5	1	787.904	1573.79	2	1573.8	-0.004	0	2e-05
	QMSLLLR	Oxidation (M)	0.0400000.0	49.05	2	438.75	875.486	2	875.49	-0.003	0	0.0036
	IAQIPVSEAYLGR			49.03	1	472.93	1415.77	3	1415.78	-0.008	0	3.2e-05
	ELIIGDR			44.89	2	408.234	814.454	2	814.455	-0.001	0	0.0079
	EQHTLIIYDDLSK			42.84	2	525.605	1573.79	3	1573.8	-0.007	0	0.0026
	VTIRADEISNIIR	Acetyl (Protein N-term)	1.0000000000000.0	39.58	1	771.429	1540.84	2	1540.86	-0.014	1	0.0031
	FLLQEKV			37.01	1	438.762	875.509	2	875.512	-0.003	1	0.04
	EVTIVNTGTVLQVGDGIAR			28.48	1	648.018	1941.03	3	1941.05	-0.022	0	0.0036
	EAYPGDVFYLHSR	Glu->pyro-Glu (N-term E)	3.0000000000000.0	28.31	1	512.578	1534.71	3	1534.72	-0.008	0	0.0022
AT1G20010.1	23				66
	GHYTEGAELIDAVLDVVR			114.64	2	653.004	1955.99	3	1955.99	-0.004	0	8e-10
	YSGDTADLQLER			90.93	2	684.326	1366.64	2	1366.64	0	0	1.4e-08
	GHYTEGAELIDAVLDVVRK			87.99	2	522.026	2084.08	4	2084.09	-0.015	1	9.4e-09
	EVDEQILNIQNK			82.38	1	722.375	1442.74	2	1441.74	0.995	0	8.4e-08
	SGPFGQIFRPDNFVFGQSGAGNNWAK			81.77	2	933.452	2797.34	3	2797.34	-0.001	1	2.2e-08
	INVYYNEASGGR			81.24	2	671.819	1341.62	2	1341.63	-0.008	0	3.8e-07
	MMLTFSVFPSPK	2 Oxidation (M)	0.440000000000.0	73.53	2	709.339	1416.66	2	1415.68	0.981	0	1.3e-07
	LHFFMVGFAPLTSR	Oxidation (M)	0.00004000000000.0	71.3	11	546.949	1637.83	3	1637.84	-0.013	0	1.1e-06
	VSEQFTAMFR	Oxidation (M)	0.0000000400.0	69.77	3	616.29	1230.57	2	1230.57	-0.004	0	2.3e-06
	GHYTEGAELIDAVLDVVRK			66.98	1	695.699	2084.08	3	2084.09	-0.014	1	5.2e-07
	YLTASAIFR			64.47	3	521.287	1040.56	2	1040.57	-0.006	0	3.9e-05
	FPGQLNSDLR			63.47	3	573.797	1145.58	2	1145.58	-0.004	0	1.3e-05
	VSEQFTAMFR			62.97	2	608.307	1214.6	2	1214.58	0.023	0	5.9e-06
	GHYTEGAELIDAVLDVVR			61.01	1	490.005	1955.99	4	1955.99	-0.003	0	0.00018
	AVLMDLEPGTMDSIR	2 Oxidation (M)	0.000400000040000.0	59.78	3	840.405	1678.8	2	1678.79	0.005	0	2.5e-06
	KLAVNLIPFPR			59.31	1	634.393	1266.77	2	1266.78	-0.011	1	1.9e-05
	FPGQLNSDLRK			58.54	4	425.565	1273.67	3	1273.68	-0.005	1	2.1e-05
	LAVNLIPFPR			57.98	14	570.347	1138.68	2	1138.69	-0.006	0	9.5e-05
	LHFFMVGFAPLTSR			55.13	1	541.616	1621.83	3	1621.84	-0.018	0	0.00062
	NSSYFVEWIPNNVK			54.94	2	848.918	1695.82	2	1695.83	-0.005	0	8.3e-06
	FPGQLNSDLRK			50.23	1	637.841	1273.67	2	1273.68	-0.011	1	0.00022
	IREEYPDR			45.84	2	359.848	1076.52	3	1076.53	-0.002	1	0.002
	SSVCDIPPK			34.52	1	502.255	1002.5	2	1001.49	1.009	0	0.0044
AT3G23810.1	23				32
	WCSCNIFSTQDHAAAAIAR			126.21	1	1089.99	2177.97	2	2177.97	-0.003	0	1.5e-12
	LVGVSEETTTGVKR			101.76	2	492.601	1474.78	3	1474.8	-0.017	1	2.6e-09
	LVGVSEETTTGVK			94.12	3	660.346	1318.68	2	1318.7	-0.021	0	4.9e-09
	ALDWGPGGGPDLIVDDGGDATLLIHEGVK			88.45	2	963.157	2886.45	3	2886.44	0.01	0	1.8e-08
	GETLQEYWWCTER			88.39	1	879.874	1757.73	2	1756.75	0.982	0	5.2e-09
	NGTFPDPTSTDNPEFQIVLSIIK			80.73	1	845.081	2532.22	3	2532.28	-0.053	0	2.7e-08
	DQSDYVSIPVEGPYKPVHYR			66.72	1	588.044	2348.15	4	2348.14	0.004	1	7.3e-07
	VAVICGYGDVGK			66.05	3	619.312	1236.61	2	1236.62	-0.007	0	2.5e-06
	WCSCNIFSTQDHAAAAIAR			65.93	1	727.328	2178.96	3	2177.97	0.99	0	6.6e-07
	DSAAVFAWK			62.46	2	497.752	993.488	2	993.492	-0.004	0	1.5e-05
	ITIKPQTDR			58.75	1	536.309	1070.6	2	1070.61	-0.005	1	0.00026
	ATDVMIAGK	Oxidation (M)	0.000040000.0	53.5	2	461.237	920.46	2	920.464	-0.004	0	4.6e-05
	DIIMVDHMR	2 Oxidation (M)	0.000400040.0	52.4	1	581.283	1160.55	2	1160.53	0.02	0	8.5e-05
	SKFDNLYGCR			51.3	2	630.296	1258.58	2	1258.58	0.001	1	4.8e-05
	ITGSLHMTIQTAVLIETLTALGAEVR	Oxidation (M)	0.00000040000000000000000000.0	49.8	1	689.371	2753.46	4	2753.5	-0.043	0	2.1e-05
	AEEIFAK			48.5	1	404.213	806.412	2	806.417	-0.005	0	0.01
	VKDMSQADFGR	Oxidation (M)	0.00040000000.0	46.51	1	423.868	1268.58	3	1268.58	-0.001	1	0.00033
	RITIKPQTDR			44.29	1	409.909	1226.71	3	1226.71	-0.003	2	0.00053
	KVYVLPK			41.88	1	423.775	845.536	2	845.537	-0.001	1	0.0029
	DGLQVDPK			41.6	1	436.228	870.442	2	870.445	-0.003	0	0.0061
	ALDWGPGGGPDLIVDDGGDATLLIHEGVK			41.09	1	722.606	2886.39	4	2886.44	-0.046	0	0.00014
	GETLQEYWWCTER			40.61	1	586.587	1756.74	3	1756.75	-0.013	0	0.00016
	HSLPDGLMR	Oxidation (M)	0.000000040.0	35.26	1	521.259	1040.5	2	1040.51	-0.004	0	0.014
AT1G75780.1	22				61
	GHYTEGAELIDAVLDVVR			114.64	2	653.004	1955.99	3	1955.99	-0.004	0	8e-10
	GHYTEGAELIDAVLDVVRK			87.99	2	522.026	2084.08	4	2084.09	-0.015	1	9.4e-09
	INVYYNEASGGR			81.24	2	671.819	1341.62	2	1341.63	-0.008	0	3.8e-07
	MMLTFSVFPSPK	2 Oxidation (M)	0.440000000000.0	73.53	2	709.339	1416.66	2	1415.68	0.981	0	1.3e-07
	LHFFMVGFAPLTSR	Oxidation (M)	0.00004000000000.0	71.3	11	546.949	1637.83	3	1637.84	-0.013	0	1.1e-06
	SGPYGQIFRPDNFVFGQSGAGNNWAK			69.98	1	939.115	2814.32	3	2813.33	0.992	1	2.7e-07
	VSEQFTAMFR	Oxidation (M)	0.0000000400.0	69.77	3	616.29	1230.57	2	1230.57	-0.004	0	2.3e-06
	GHYTEGAELIDAVLDVVRK			66.98	1	695.699	2084.08	3	2084.09	-0.014	1	5.2e-07
	FPGQLNSDLR			63.47	3	573.797	1145.58	2	1145.58	-0.004	0	1.3e-05
	VSEQFTAMFR			62.97	2	608.307	1214.6	2	1214.58	0.023	0	5.9e-06
	GHYTEGAELIDAVLDVVR			61.01	1	490.005	1955.99	4	1955.99	-0.003	0	0.00018
	AVLMDLEPGTMDSIR	2 Oxidation (M)	0.000400000040000.0	59.78	3	840.405	1678.8	2	1678.79	0.005	0	2.5e-06
	KLAVNLIPFPR			59.31	1	634.393	1266.77	2	1266.78	-0.011	1	1.9e-05
	FPGQLNSDLRK			58.54	4	425.565	1273.67	3	1273.68	-0.005	1	2.1e-05
	LAVNLIPFPR			57.98	14	570.347	1138.68	2	1138.69	-0.006	0	9.5e-05
	LHFFMVGFAPLTSR			55.13	1	541.616	1621.83	3	1621.84	-0.018	0	0.00062
	NSSYFVEWIPNNVK			54.94	2	848.918	1695.82	2	1695.83	-0.005	0	8.3e-06
	FPGQLNSDLRK			50.23	1	637.841	1273.67	2	1273.68	-0.011	1	0.00022
	IREEYPDR			45.84	2	359.848	1076.52	3	1076.53	-0.002	1	0.002
	YLTASAMFR			35.27	1	530.268	1058.52	2	1058.52	-0.001	0	0.0037
	YLTASAMFR	Oxidation (M)	0.000000400.0	33.79	1	538.266	1074.52	2	1074.52	0.001	0	0.0029
	EVDEQILNVQNK			26.57	1	714.869	1427.72	2	1427.73	-0.002	0	0.0082
AT1G79930.1	22				27
	GSVIDQLGYCINSYR			108.57	1	872.919	1743.82	2	1743.83	-0.001	0	2.2e-10
	AVLDAATIAGLHPLR			92.87	1	506.629	1516.87	3	1516.87	-0.006	0	2.1e-08
	DFDEVLFNHFAAK			83.74	3	518.252	1551.73	3	1551.74	-0.002	0	3.4e-07
	GCALQCAILSPTFK			79.64	1	783.384	1564.75	2	1564.77	-0.021	0	7.3e-08
	FIGTAGAASTMMNPK	2 Oxidation (M)	0.000000000044000.0	78.67	1	764.861	1527.71	2	1527.71	0.001	0	4.2e-08
	FKDEYKIDVSQNAK			77.46	1	562.288	1683.84	3	1683.85	-0.005	2	1.3e-05
	LSDKYQEYITDSER			74.36	1	582.938	1745.79	3	1745.81	-0.018	1	2.9e-07
	NLNTAVVDCCIGIPVYFTDLQR			70.88	1	856.745	2567.21	3	2567.25	-0.038	0	2.7e-07
	AVEKEFEMALQDR	Oxidation (M)	0.0000000400000.0	65.56	1	791.383	1580.75	2	1580.75	0.001	1	2.1e-06
	VGDPVEVR			63.98	1	435.736	869.456	2	869.461	-0.004	0	6.3e-05
	GIDVVLNDESNR			63.71	1	665.834	1329.65	2	1329.65	0.001	0	2.4e-06
	FDHIELAEK			63.37	1	551.78	1101.55	2	1100.55	0.995	0	9.1e-05
	ISTYTIGPFQSSK			62.15	1	714.869	1427.72	2	1427.73	-0.007	0	1.5e-06
	ILTEFFGKEPR			57.81	2	446.246	1335.72	3	1335.72	-0.002	1	5.1e-05
	SVVGFDFGNENCLVAVAR	Acetyl (Protein N-term)	1.000000000000000000.0	53.23	1	666	1994.98	3	1994.95	0.027	0	1e-05
	REEFEEISIPILER			52.96	2	587.308	1758.9	3	1758.91	-0.013	1	6.6e-05
	TNVPLSELVYGALK			52.67	2	752.418	1502.82	2	1502.83	-0.013	0	6e-05
	QFSDPELQR			50.7	1	560.271	1118.53	2	1118.54	-0.008	0	0.00056
	NAVESYVYDMR	Oxidation (M)	0.00000000040.0	48	1	682.309	1362.6	2	1361.59	1.012	0	3.4e-05
	YATPALLSADVK			40.56	1	624.839	1247.66	2	1247.68	-0.012	0	0.00033
	AVEKEFEMALQDR	Oxidation (M)	0.0000000400000.0	39.65	1	528.26	1581.76	3	1580.75	1.009	1	0.00068
	GNPIPSVK			37.07	1	406.235	810.456	2	810.46	-0.004	0	0.0023
AT2G29550.1	22				63
	GHYTEGAELIDSVLDVVR			136.8	4	658.337	1971.99	3	1971.99	-0.002	0	8e-12
	GHYTEGAELIDSVLDVVRK			126.3	2	526.027	2100.08	4	2100.09	-0.008	1	1.5e-12
	GHYTEGAELIDSVLDVVR			120.21	1	494.257	1973	4	1971.99	1.007	0	1.1e-10
	EVDEQMLNVQNK	Oxidation (M)	0.000004000000.0	79.26	2	731.847	1461.68	2	1461.68	0.002	0	1e-07
	YVGDSELQLER			77.96	1	654.824	1307.63	2	1307.64	-0.002	0	8.9e-07
	LHFFMVGFAPLTSR	Oxidation (M)	0.00004000000000.0	71.3	11	546.949	1637.83	3	1637.84	-0.013	0	1.1e-06
	SGPYGQIFRPDNFVFGQSGAGNNWAK			69.98	1	939.115	2814.32	3	2813.33	0.992	1	2.7e-07
	VSEQFTAMFR	Oxidation (M)	0.0000000400.0	69.77	3	616.29	1230.57	2	1230.57	-0.004	0	2.3e-06
	AVLMDLEPGTMDSVR	2 Oxidation (M)	0.000400000040000.0	69.28	1	833.395	1664.78	2	1664.78	0	0	1.4e-06
	VNVYYNEASCGR			67.69	1	716.322	1430.63	2	1430.62	0.005	0	4.5e-07
	FPGQLNSDLR			63.47	3	573.797	1145.58	2	1145.58	-0.004	0	1.3e-05
	VSEQFTAMFR			62.97	2	608.307	1214.6	2	1214.58	0.023	0	5.9e-06
	KLAVNLIPFPR			59.31	1	634.393	1266.77	2	1266.78	-0.011	1	1.9e-05
	FPGQLNSDLRK			58.54	4	425.565	1273.67	3	1273.68	-0.005	1	2.1e-05
	LAVNLIPFPR			57.98	14	570.347	1138.68	2	1138.69	-0.006	0	9.5e-05
	LHFFMVGFAPLTSR			55.13	1	541.616	1621.83	3	1621.84	-0.018	0	0.00062
	NSSYFVEWIPNNVK			54.94	2	848.918	1695.82	2	1695.83	-0.005	0	8.3e-06
	FPGQLNSDLRK			50.23	1	637.841	1273.67	2	1273.68	-0.011	1	0.00022
	STVCDIPPTGLK			48.35	4	644.834	1287.65	2	1286.65	1	0	9.3e-05
	IREEYPDR			45.84	2	359.848	1076.52	3	1076.53	-0.002	1	0.002
	YLTASAMFR			35.27	1	530.268	1058.52	2	1058.52	-0.001	0	0.0037
	YLTASAMFR	Oxidation (M)	0.000000400.0	33.79	1	538.266	1074.52	2	1074.52	0.001	0	0.0029
AT3G03780.1	22				30
	LNLPILPTTTIGSFPQTVELR			148.33	1	770.77	2309.29	3	2309.3	-0.011	0	1.2e-14
	KLNLPILPTTTIGSFPQTVELR			117.63	1	813.466	2437.38	3	2437.39	-0.019	1	1.5e-11
	GMLTGPVTILNWSFVR	Oxidation (M)	0.0400000000000000.0	105.76	1	602.984	1805.93	3	1805.95	-0.019	0	5.1e-09
	YGAGIGPGVYDIHSPR			100.93	1	553.612	1657.82	3	1657.82	-0.006	0	3.4e-10
	ALGVETVPVLVGPVSYLLLSK			90.57	1	718.761	2153.26	3	2153.27	-0.01	0	3.2e-09
	HETCYQIALAIKDEVEDLEK			75.25	2	601.794	2403.14	4	2403.16	-0.018	1	1.3e-07
	LNLPILPTTTIGSFPQTVELR			74.88	1	578.328	2309.28	4	2309.3	-0.018	0	1e-07
	HETCYQIALAIKDEVEDLEK			73.08	1	802.383	2404.13	3	2403.16	0.966	1	1.1e-06
	GVTAFGFDLVR			66.32	4	591.316	1180.62	2	1180.62	-0.006	0	1.3e-05
	LVVSTSCSLLHTAVDLINETK			66.15	1	767.408	2299.2	3	2299.21	-0.008	0	2.3e-06
	FALESFWDGK			65.73	2	600.289	1198.56	2	1198.57	-0.002	0	9.1e-06
	YLFAGVVDGR			61.09	2	548.791	1095.57	2	1095.57	-0.003	0	2.1e-05
	CVKPPVIYGDVSRPK			58.71	1	429.489	1713.93	4	1713.92	0.004	2	3.1e-06
	GGIGVIQIDEAALR			56.98	1	706.396	1410.78	2	1410.78	-0.005	0	4.6e-06
	ASHIVGYPR	Acetyl (Protein N-term)	1.000000000.0	50.86	2	521.276	1040.54	2	1040.54	-0.004	0	0.00016
	MLAVLEQNILWVNPDCGLK			49.76	1	738.374	2212.1	3	2212.14	-0.037	0	2.2e-05
	SFDLLSLLPK			46.03	2	566.832	1131.65	2	1131.65	-0.004	0	0.00033
	YTEVKPALK			45.09	1	350.199	1047.58	3	1047.6	-0.021	1	0.0002
	GNASVPAMEMTK	2 Oxidation (M)	0.000000040400.0	37.57	1	634.781	1267.55	2	1266.56	0.989	0	0.00066
	KLNLPILPTTTIGSFPQTVELR			35	1	610.352	2437.38	4	2437.39	-0.015	1	0.00095
	LVVSTSCSLLHTAVDLINETK			30.15	1	575.807	2299.2	4	2299.21	-0.009	0	0.0015
	CVKPPVIYGDVSR			27.55	1	497.262	1488.76	3	1488.78	-0.012	1	0.3
AT3G26650.1	22				64
	VPTPNVSVVDLVVQVSKKTFAEEVNAAFR			169.66	1	786.685	3142.71	4	3142.7	0.007	2	1.2e-16
	VPTPNVSVVDLVVQVSKK			127.61	3	636.708	1907.1	3	1907.11	-0.006	1	1.1e-12
	DSPLDIIAINDTGGVK			103.63	4	814.429	1626.84	2	1626.85	-0.002	0	1.1e-08
	VVDLADIVANNWK			99.96	6	728.89	1455.77	2	1455.77	-0.007	0	5.4e-09
	YDSTLGIFDADVKPSGETAISVDGK			87.16	2	862.425	2584.25	3	2584.25	-0.003	1	6.7e-09
	VIAWYDNEWGYSQR			86.58	1	894.404	1786.79	2	1785.81	0.983	0	7.6e-09
	AAALNIVPTSTGAAK			85.8	4	692.891	1383.77	2	1383.77	-0.005	0	8.1e-08
	VPTPNVSVVDLVVQVSK			84.35	3	594.009	1779.01	3	1779.01	-0.008	0	7.5e-08
	GILDVCDEPLVSVDFR			83.57	2	611.971	1832.89	3	1832.9	-0.005	0	1.5e-08
	TFAEEVNAAFR			83.33	6	627.808	1253.6	2	1253.6	-0.003	0	7.1e-08
	VPTPNVSVVDLVVQVSKK			76.92	1	477.786	1907.12	4	1907.11	0.008	1	6.5e-08
	KDSPLDIIAINDTGGVK			74.11	1	585.986	1754.94	3	1754.94	-0.006	1	8.1e-06
	KTFAEEVNAAFR			65.47	1	461.572	1381.69	3	1381.7	-0.006	1	3.3e-05
	NPSLLPWK			60.26	4	477.773	953.531	2	953.533	-0.002	0	2.9e-05
	IIQVVSNR			55.32	3	464.782	927.549	2	927.55	-0.001	0	0.00045
	VAINGFGR			55.17	4	417.234	832.453	2	832.456	-0.002	0	0.00098
	AVALVLPNLK			55.15	6	519.337	1036.66	2	1036.66	-0.005	0	6.5e-05
	VIAWYDNEWGYSQR			53.91	1	596.273	1785.8	3	1785.81	-0.014	0	1.3e-05
	LNGIALR			53.34	4	378.739	755.463	2	755.465	-0.002	0	0.00062
	GTMTTTHSYTGDQR	Oxidation (M)	0.00400000000000.0	52.47	3	524.561	1570.66	3	1570.67	-0.006	0	1.4e-05
	VIITAPGK			48.45	3	399.756	797.498	2	797.501	-0.003	0	0.00082
	ELGIDIVIEGTGVFVDR			36.12	1	611.332	1830.97	3	1830.97	0.001	0	0.00041
AT5G12250.1	22				59
	GHYTEGAELIDAVLDVVR			114.64	2	653.004	1955.99	3	1955.99	-0.004	0	8e-10
	GHYTEGAELIDAVLDVVRK			87.99	2	522.026	2084.08	4	2084.09	-0.015	1	9.4e-09
	EVDEQMINVQNK	Oxidation (M)	0.000004000000.0	79.26	2	731.847	1461.68	2	1461.68	0.002	0	1e-07
	YVGNSDLQLER			74.63	1	647.322	1292.63	2	1292.64	-0.006	0	4.4e-07
	MMLTFSVFPSPK	2 Oxidation (M)	0.440000000000.0	73.53	2	709.339	1416.66	2	1415.68	0.981	0	1.3e-07
	LHFFMVGFAPLTSR	Oxidation (M)	0.00004000000000.0	71.3	11	546.949	1637.83	3	1637.84	-0.013	0	1.1e-06
	VSEQFTAMFR	Oxidation (M)	0.0000000400.0	69.77	3	616.29	1230.57	2	1230.57	-0.004	0	2.3e-06
	VNVYYNEASCGR			67.69	1	716.322	1430.63	2	1430.62	0.005	0	4.5e-07
	GHYTEGAELIDAVLDVVRK			66.98	1	695.699	2084.08	3	2084.09	-0.014	1	5.2e-07
	FPGQLNSDLR			63.47	3	573.797	1145.58	2	1145.58	-0.004	0	1.3e-05
	VSEQFTAMFR			62.97	2	608.307	1214.6	2	1214.58	0.023	0	5.9e-06
	GHYTEGAELIDAVLDVVR			61.01	1	490.005	1955.99	4	1955.99	-0.003	0	0.00018
	KLAVNLIPFPR			59.31	1	634.393	1266.77	2	1266.78	-0.011	1	1.9e-05
	FPGQLNSDLRK			58.54	4	425.565	1273.67	3	1273.68	-0.005	1	2.1e-05
	LAVNLIPFPR			57.98	14	570.347	1138.68	2	1138.69	-0.006	0	9.5e-05
	LHFFMVGFAPLTSR			55.13	1	541.616	1621.83	3	1621.84	-0.018	0	0.00062
	NSSYFVEWIPNNVK			54.94	2	848.918	1695.82	2	1695.83	-0.005	0	8.3e-06
	FPGQLNSDLRK			50.23	1	637.841	1273.67	2	1273.68	-0.011	1	0.00022
	IREEYPDR			45.84	2	359.848	1076.52	3	1076.53	-0.002	1	0.002
	YLTASAMFR			35.27	1	530.268	1058.52	2	1058.52	-0.001	0	0.0037
	YLTASAMFR	Oxidation (M)	0.000000400.0	33.79	1	538.266	1074.52	2	1074.52	0.001	0	0.0029
	AILMDLEPGTMDSVR	2 Oxidation (M)	0.000400000040000.0	27.27	1	840.402	1678.79	2	1678.79	0	0	0.009
AT5G44340.1	22				63
	GHYTEGAELIDSVLDVVR			136.8	4	658.337	1971.99	3	1971.99	-0.002	0	8e-12
	GHYTEGAELIDSVLDVVRK			126.3	2	526.027	2100.08	4	2100.09	-0.008	1	1.5e-12
	GHYTEGAELIDSVLDVVR			120.21	1	494.257	1973	4	1971.99	1.007	0	1.1e-10
	EILHIQGGQCGNQIGAK			94.09	1	608.312	1821.91	3	1821.92	-0.002	0	4.9e-09
	SGPFGQIFRPDNFVFGQSGAGNNWAK			81.77	2	933.452	2797.34	3	2797.34	-0.001	1	2.2e-08
	IDVYFNEASGGK			76.92	2	650.313	1298.61	2	1298.61	-0.004	0	3.3e-06
	LHFFMVGFAPLTSR	Oxidation (M)	0.00004000000000.0	71.3	11	546.949	1637.83	3	1637.84	-0.013	0	1.1e-06
	VSEQFTAMFR	Oxidation (M)	0.0000000400.0	69.77	3	616.29	1230.57	2	1230.57	-0.004	0	2.3e-06
	EVDEQMMNIQNK	2 Oxidation (M)	0.000004400000.0	69.16	1	755.824	1509.63	2	1509.64	-0.01	0	3.3e-07
	FPGQLNSDLR			63.47	3	573.797	1145.58	2	1145.58	-0.004	0	1.3e-05
	VSEQFTAMFR			62.97	2	608.307	1214.6	2	1214.58	0.023	0	5.9e-06
	YLTASAVFR			61.62	1	514.281	1026.55	2	1026.55	-0.002	0	0.00013
	AVLMDLEPGTMDSLR	2 Oxidation (M)	0.000400000040000.0	59.78	3	840.405	1678.8	2	1678.79	0.005	0	2.5e-06
	KLAVNLIPFPR			59.31	1	634.393	1266.77	2	1266.78	-0.011	1	1.9e-05
	FPGQLNSDLRK			58.54	4	425.565	1273.67	3	1273.68	-0.005	1	2.1e-05
	LAVNLIPFPR			57.98	14	570.347	1138.68	2	1138.69	-0.006	0	9.5e-05
	SSVCDIAPK			55.45	1	488.741	975.468	2	975.47	-0.001	0	0.00022
	LHFFMVGFAPLTSR			55.13	1	541.616	1621.83	3	1621.84	-0.018	0	0.00062
	NSSYFVEWIPNNVK			54.94	2	848.918	1695.82	2	1695.83	-0.005	0	8.3e-06
	FPGQLNSDLRK			50.23	1	637.841	1273.67	2	1273.68	-0.011	1	0.00022
	IREEYPDR			45.84	2	359.848	1076.52	3	1076.53	-0.002	1	0.002
	GLKMASTFIGNSTSIQEMFR	2 Oxidation (M)	0.00040000000000000400.0	33.19	1	751.024	2250.05	3	2249.08	0.967	1	0.00077
C_GFP|eGFP	22				68
	GEELFTGVVPILVELDGDVNGHK			139.25	5	813.088	2436.24	3	2436.25	-0.01	0	8.8e-14
	FSVSGEGEGDATYGKLTLK			132.68	1	653.658	1957.95	3	1957.96	-0.01	1	4.5e-13
	FSVSGEGEGDATYGK			113.41	11	752.333	1502.65	2	1502.65	-0.002	0	9.2e-11
	VSKGEELFTGVVPILVELDGDVNGHK			112	5	688.87	2751.45	4	2750.45	1.002	1	3.2e-11
	GIDFKEDGNILGHK			99.87	3	514.934	1541.78	3	1541.78	-0.004	1	1.9e-09
	AEVKFEGDTLVNR			91.03	3	739.383	1476.75	2	1476.76	-0.006	1	3.4e-08
	GEELFTGVVPILVELDGDVNGHK			88.39	2	610.322	2437.26	4	2436.25	1.004	0	5.2e-09
	LEYNYNSHNVYIMADK	Oxidation (M)	0.0000000000004000.0	85.87	3	664.313	1989.92	3	1988.89	1.022	0	8.9e-09
	AEVKFEGDTLVNRIELK			80.09	2	491.022	1960.06	4	1960.06	-0.005	2	5e-08
	AEVKFEGDTLVNRIELK			74.65	1	654.356	1960.05	3	1960.06	-0.017	2	2.7e-07
	AEVKFEGDTLVNR			72.64	5	493.259	1476.75	3	1476.76	-0.003	1	2.9e-07
	FEGDTLVNR			71.69	7	525.763	1049.51	2	1049.51	-0.002	0	3.1e-06
	SAMPEGYVQER	Oxidation (M)	0.00400000000.0	67.88	4	641.788	1281.56	2	1281.57	-0.004	0	2e-06
	TIFFKDDGNYK			61.61	5	674.329	1346.64	2	1346.65	-0.008	1	0.00014
	LEYNYNSHNVYIMADKQK	Oxidation (M)	0.000000000000400000.0	61.53	1	562.271	2245.05	4	2245.05	0.006	1	1.7e-06
	SAMPEGYVQER			58.54	2	633.792	1265.57	2	1265.57	-0.001	0	8.9e-05
	FEGDTLVNRIELK			57.94	3	511.943	1532.81	3	1532.82	-0.012	1	2.3e-05
	YPDHMKQHDFFK	Oxidation (M)	0.000040000000.0	54.07	1	402.938	1607.72	4	1607.72	0.004	1	8.5e-06
	YPDHMKQHDFFK	Oxidation (M)	0.000040000000.0	50.86	1	537.245	1608.71	3	1607.72	0.994	1	1.7e-05
	GIDFKEDGNILGHK			38.15	1	771.897	1541.78	2	1541.78	-0.005	1	0.038
	FICTTGK			33.49	1	413.709	825.404	2	825.405	-0.002	0	0.054
	TIFFKDDGNYKTR			31.67	1	535.947	1604.82	3	1603.8	1.02	2	0.0021
AT1G01320.1	21				22
	LLSVNFDTCHVTNYSLSHEIR			116.51	1	627.067	2504.24	4	2504.21	0.028	0	1.2e-11
	NGTPKPDASIASK			93.96	1	429.223	1284.65	3	1284.67	-0.02	1	1.9e-09
	QKEMSEEDTEETGSEEGK	Oxidation (M)	0.000400000000000000.0	83.76	1	686.951	2057.83	3	2057.82	0.008	1	8.9e-08
	VLPVIVDVIVNLPDETEAILK			76.49	1	763.785	2288.33	3	2288.32	0.008	0	6.7e-08
	QSNVSEHLVEIPR			75.97	1	503.264	1506.77	3	1506.78	-0.01	0	2.8e-07
	IICHNLVDLLR			74.94	1	456.27	1365.79	3	1364.76	1.029	0	2.3e-06
	LVADFGSLELSPVDGR			72.31	1	558.964	1673.87	3	1673.86	0.007	0	6.3e-07
	GHLSVSDLLDYINPSHNAK			72.12	1	520.768	2079.04	4	2079.04	0.003	0	7.9e-07
	QSDTSPPPSPASK			61.55	1	650.313	1298.61	2	1297.62	0.996	0	3.3e-06
	NSVVSLGK			52.9	1	402.227	802.44	2	802.455	-0.014	0	0.0016
	ETEDIAKEDHLLSIDVK			49.42	1	652.334	1953.98	3	1953.99	-0.01	1	2.3e-05
	SYGDLAVFYYR			49.39	1	677.321	1352.63	2	1352.64	-0.013	0	9.9e-05
	KTDVVSLVPVHK			47.18	1	441.262	1320.76	3	1320.78	-0.013	1	0.00056
	TASYSSYADHHSPGLTTQGTK			46.09	1	553	2207.97	4	2208.01	-0.039	0	4.8e-05
	FGNLPYGFR			42.44	2	535.775	1069.54	2	1069.54	0.001	0	0.00052
	TFSILLR			37.27	1	425.265	848.516	2	848.512	0.004	0	0.0017
	LGPDDLR			35.35	1	393.214	784.413	2	784.408	0.005	0	0.0056
	GHLSVSDLLDYINPSHNAK			34.58	1	694.013	2079.02	3	2079.04	-0.021	0	0.00057
	SLQELVDLAQNYYTEVAIPK			34.53	1	574.301	2293.18	4	2293.18	-0.009	0	0.00058
	TPQQHDDELTSSR			34.42	1	757.337	1512.66	2	1512.68	-0.021	0	0.00059
	MPISLLNRPYDSQPFK	Oxidation (M)	0.4000000000000000.0	26.19	1	641.66	1921.96	3	1920.98	0.982	1	0.0035
AT1G62750.1	21				23
	QSGGQGQFADITVR			119.29	1	732.362	1462.71	2	1462.72	-0.008	0	1.9e-10
	VALTGDIIALAGLK			105.62	1	677.916	1353.82	2	1353.82	-0.006	0	1.6e-09
	VVDSLVPLAEMFQYVSTLR			102.14	1	723.053	2166.14	3	2166.14	-0.003	0	6e-10
	VEVVTPEEHLGDVIGDLNSR			98.18	1	726.706	2177.1	3	2177.1	0	0	4.3e-09
	VLDGAICLFDSVAGVEPQSETVWR			87.64	1	883.438	2647.29	3	2647.3	-0.002	0	2.1e-08
	INIIDTPGHVDFTLEVER			79.91	2	690.362	2068.06	3	2067.06	0.999	0	8.7e-08
	GQINSFGDKPGGLK			78.64	1	473.252	1416.73	3	1416.74	-0.003	1	3e-07
	IMSDPFVGSLTFVR	Oxidation (M)	0.04000000000000.0	74.96	1	792.906	1583.8	2	1583.8	-0.003	0	2.1e-06
	FEPLEAGSGYEFK			74.56	1	737.348	1472.68	2	1472.68	-0.001	0	7.5e-07
	VEANVGAPQVNYR			73.6	1	708.861	1415.71	2	1415.72	-0.007	0	3.9e-07
	VVDSLVPLAEMFQYVSTLR	Oxidation (M)	0.0000000000400000000.0	62.31	2	728.375	2182.1	3	2182.13	-0.032	0	1.5e-06
	FSYEDIPEDLEDLAQEYR			60.12	1	744.665	2230.97	3	2230.99	-0.017	0	2.3e-06
	KPDDDEPFAGLAFK			58.92	1	517.255	1548.74	3	1548.75	-0.003	1	3e-06
	PLVLQIPIGAEDVFK			58.77	1	547.309	1638.9	3	1637.94	0.965	0	7.4e-06
	LGANFFR			57.57	1	412.722	823.429	2	823.434	-0.005	0	0.00031
	FVPILCGSAFK			44.89	1	619.829	1237.64	2	1237.65	-0.01	0	0.00011
	MDFPDPVIK	Oxidation (M)	0.400000000.0	41.52	1	539.265	1076.52	2	1076.52	-0.005	0	0.00018
	FDVVPQHIQNQLSSK			34.72	1	870.451	1738.89	2	1738.9	-0.013	0	0.00055
	NIGIMAHIDAGK	Oxidation (M)	0.000040000000.0	34.64	1	419.225	1254.65	3	1254.64	0.015	0	0.0059
	ILYYTGR			33.02	1	443.236	884.458	2	884.476	-0.018	0	0.006
	GVVDLVR			32.35	1	379.228	756.442	2	756.449	-0.008	0	0.21
AT3G14420.1	21				27
	AASAAGTIMTLSSWATSSVEEVASTGPGIR	Oxidation (M)	0.000000004000000000000000000000.0	109.8	1	732.128	2924.48	4	2923.42	1.058	0	5.1e-11
	IAIQAGAAGIIVSNHGAR			107.78	1	573.659	1717.96	3	1717.96	-0.003	0	9.6e-11
	QLDYVPATISALEEVVK			85.97	1	625.672	1873.99	3	1874	-0.008	0	2.9e-08
	ALALGASGIFIGR			83.57	1	623.365	1244.71	2	1244.72	-0.009	0	1.7e-07
	MEITNVTEYDAIAK	Acetyl (Protein N-term); Oxidation (M)	1.40000000000000.0	78.67	1	828.393	1654.77	2	1654.78	-0.004	0	4.2e-08
	MAHPDGEYATAR	Oxidation (M)	0.400000000000.0	71.55	1	445.53	1333.57	3	1333.57	-0.002	0	3.5e-07
	IDMTTTVLGFK	Oxidation (M)	0.00400000000.0	70.49	1	621.323	1240.63	2	1240.64	-0.007	0	7.3e-07
	AIALTVDTPR			64.27	1	528.805	1055.6	2	1055.6	-0.003	0	6e-05
	IPVFLDGGVR			55.77	1	536.808	1071.6	2	1071.61	-0.007	0	0.00019
	QLDYVPATISALEEVVK	Gln->pyro-Glu (N-term Q)	2.00000000000000000.0	51.48	1	929.485	1856.96	2	1856.98	-0.021	0	1.5e-05
	QLDYVPATISALEEVVK			48.34	1	938.008	1874	2	1874	-0.002	0	3.8e-05
	NVVEQLVR			47.62	2	478.777	955.54	2	955.545	-0.005	0	0.0025
	NHITTEWDTPRPSAR			46.64	1	445.969	1779.85	4	1779.87	-0.02	1	0.00069
	FTLPPNLTLK			44.6	5	572.339	1142.66	2	1142.67	-0.007	0	0.0066
	DVQWLQTITK			43.45	1	616.335	1230.66	2	1230.66	-0.005	0	0.00036
	MAHPDGEYATAR			41.65	1	440.207	1317.6	3	1317.58	0.022	0	0.00028
	NHITTEWDTPRPSAR			41.49	1	594.292	1779.85	3	1779.87	-0.011	1	0.00013
	GVLTGEDAR			40.12	1	459.237	916.46	2	916.461	-0.001	0	0.023
	ILIDVSK			39.47	1	394.248	786.481	2	786.485	-0.004	0	0.025
	FFQLYVYK			34.13	2	554.786	1107.56	2	1106.58	0.977	0	0.013
	ISMPIMVAPTAMQK	3 Oxidation (M)	0.00400400000400.0	33.88	1	783.383	1564.75	2	1564.77	-0.015	0	0.00088
AT2G39800.1	20				22
	ACTVEVVEDVYGAIDHIHR			122.26	2	546.517	2182.04	4	2182.05	-0.009	0	3.4e-12
	KTEVADGLVLEK			99.04	1	651.353	1300.69	2	1300.72	-0.031	1	1.7e-08
	ILLDIADALEANVTTIK			95.81	1	605.008	1812	3	1812.02	-0.022	0	9.2e-09
	EEIPDLLKLDDVIDLVIPR			90.84	1	735.755	2204.24	3	2204.23	0.014	1	3e-09
	VGTLFHQDAR			89.95	1	572.297	1142.58	2	1142.58	-0.004	0	1.1e-07
	QVDSAAVFHNASTR			86.18	1	501.582	1501.72	3	1501.73	-0.005	0	1.7e-08
	ADLLILLSDVEGLYTGPPSDPNSK			84.18	1	839.11	2514.31	3	2513.29	1.017	0	1.3e-08
	LDDVIDLVIPR			82.82	1	634.36	1266.7	2	1266.72	-0.013	0	1.3e-07
	KLQALSSEDR			78.37	1	573.803	1145.59	2	1145.6	-0.013	1	4.4e-06
	VITDAIPETVGGK			70.66	1	650.359	1298.7	2	1298.71	-0.004	0	1.1e-06
	FGLGAEVGVSTGR			69.84	1	625.33	1248.65	2	1248.65	0	0	3.2e-06
	LWAPITDSNAR			69.19	1	622.828	1243.64	2	1242.64	1.006	0	2.7e-06
	AAVNAAYAGIPVIITSGYSAENIDK			68.28	1	627.822	2507.26	4	2507.29	-0.031	0	2.7e-06
	ILNIPEAR			63.42	2	463.276	924.538	2	924.539	-0.001	0	4.6e-05
	VGTAVVTGK			55.37	1	416.248	830.481	2	830.486	-0.005	0	0.00061
	ISSLAASVR			49.1	1	452.263	902.511	2	902.519	-0.007	0	0.0038
	LIGLVTSR			39.73	1	429.772	857.529	2	857.533	-0.004	0	0.019
	QLVNSSFADLQKPQTELDGK			37.06	1	740.054	2217.14	3	2217.13	0.013	1	0.035
	VGTLFHQDAR			30.58	1	381.87	1142.59	3	1142.58	0.006	0	0.02
	EEIPDLLK			30.04	1	478.765	955.516	2	955.523	-0.006	0	0.044
AT3G17390.1	20				24
	EIGFVSADVGLDADNCK			125.99	1	905.415	1808.82	2	1808.83	-0.009	0	2.5e-12
	IIIDTYGGWGAHGGGAFSGK			105.16	1	655.328	1962.96	3	1962.96	0.003	0	1.4e-10
	TQVTIEYINESGAMVPVR	Oxidation (M)	0.000000000000040000.0	93.49	1	1012.52	2023.03	2	2022.01	1.023	0	1.7e-09
	VLVNIEQQSPDIAQGVHGHLTK			86.13	1	795.428	2383.26	3	2382.27	0.998	0	8.4e-09
	FVIGGPHGDAGLTGR			83.91	4	485.254	1452.74	3	1452.75	-0.007	0	2.9e-08
	IIIDTYGGWGAHGGGAFSGKDPTK			82.56	1	802.396	2404.17	3	2404.18	-0.015	1	1.8e-08
	IPDKEILEIVK			79.68	1	432.929	1295.77	3	1295.77	-0.004	1	8.4e-07
	IPDKEILEIVK			73.48	1	648.887	1295.76	2	1295.77	-0.011	1	4e-06
	ANVDYEQIVR			72.61	1	603.807	1205.6	2	1205.6	-0.005	0	3.1e-06
	VLVNIEQQSPDIAQGVHGHLTK			69.15	1	596.57	2382.25	4	2382.27	-0.013	0	3.3e-07
	VHTVLISTQHDETVTNDEIAADLK			67.35	1	663.088	2648.32	4	2648.33	-0.007	0	4.8e-07
	TAAYGHFGR			54.52	1	490.239	978.464	2	978.467	-0.003	0	6.8e-05
	ESFDFRPGMISINLDLKR	Oxidation (M)	0.000000004000000000.0	54.36	1	539.284	2153.11	4	2153.09	0.013	2	8e-06
	FVIGGPHGDAGLTGR			53.81	1	727.376	1452.74	2	1452.75	-0.01	0	9e-06
	TIFHLNPSGR			50.83	2	381.207	1140.6	3	1140.6	-0.005	0	0.00011
	SGAYIVR			47.36	1	383.215	764.415	2	764.418	-0.003	0	0.0027
	NGTCPWLRPDGK			31.49	1	467.561	1399.66	3	1399.67	-0.005	1	0.0011
	TIFHLNPSGR			30.43	1	571.308	1140.6	2	1140.6	-0.003	0	0.0087
	DDADFTWEVVKPLK			28.37	1	554.949	1661.83	3	1661.83	-0.004	1	0.0022
	NGTCPWLRPDGK			26.62	1	701.348	1400.68	2	1399.67	1.015	1	0.0052
AT4G20890.1	20				60
	GHYTEGAELIDSVLDVVR			136.8	4	658.337	1971.99	3	1971.99	-0.002	0	8e-12
	GHYTEGAELIDSVLDVVRK			126.3	2	526.027	2100.08	4	2100.09	-0.008	1	1.5e-12
	GHYTEGAELIDSVLDVVR			120.21	1	494.257	1973	4	1971.99	1.007	0	1.1e-10
	EILHIQGGQCGNQIGAK			94.09	1	608.312	1821.91	3	1821.92	-0.002	0	4.9e-09
	SGPFGQIFRPDNFVFGQSGAGNNWAK			81.77	2	933.452	2797.34	3	2797.34	-0.001	1	2.2e-08
	LHFFMVGFAPLTSR	Oxidation (M)	0.00004000000000.0	71.3	11	546.949	1637.83	3	1637.84	-0.013	0	1.1e-06
	VSEQFTAMFR	Oxidation (M)	0.0000000400.0	69.77	3	616.29	1230.57	2	1230.57	-0.004	0	2.3e-06
	FPGQLNSDLR			63.47	3	573.797	1145.58	2	1145.58	-0.004	0	1.3e-05
	VSEQFTAMFR			62.97	2	608.307	1214.6	2	1214.58	0.023	0	5.9e-06
	YLTASAVFR			61.62	1	514.281	1026.55	2	1026.55	-0.002	0	0.00013
	AVLMDLEPGTMDSLR	2 Oxidation (M)	0.000400000040000.0	59.78	3	840.405	1678.8	2	1678.79	0.005	0	2.5e-06
	KLAVNLIPFPR			59.31	1	634.393	1266.77	2	1266.78	-0.011	1	1.9e-05
	FPGQLNSDLRK			58.54	4	425.565	1273.67	3	1273.68	-0.005	1	2.1e-05
	LAVNLIPFPR			57.98	14	570.347	1138.68	2	1138.69	-0.006	0	9.5e-05
	LHFFMVGFAPLTSR			55.13	1	541.616	1621.83	3	1621.84	-0.018	0	0.00062
	NSSYFVEWIPNNVK			54.94	2	848.918	1695.82	2	1695.83	-0.005	0	8.3e-06
	INVYFNEASGGK			53.2	1	650.34	1298.67	2	1297.63	1.036	0	0.00056
	FPGQLNSDLRK			50.23	1	637.841	1273.67	2	1273.68	-0.011	1	0.00022
	EVDEQMMNVQNK	2 Oxidation (M)	0.000004400000.0	47.03	1	748.814	1495.61	2	1495.63	-0.015	0	0.00011
	IREEYPDR			45.84	2	359.848	1076.52	3	1076.53	-0.002	1	0.002
AT1G12900.1	19				52
	VPTPNVSVVDLVVQVSKKTFAEEVNAAFR			169.66	1	786.685	3142.71	4	3142.7	0.007	2	1.2e-16
	VPTPNVSVVDLVVQVSKK			127.61	3	636.708	1907.1	3	1907.11	-0.006	1	1.1e-12
	KDSPLDVVVINDTGGVK			114.43	1	878.471	1754.93	2	1754.94	-0.014	1	7.6e-10
	VVDLADIVANNWK			99.96	6	728.89	1455.77	2	1455.77	-0.007	0	5.4e-09
	YDSTLGIFDADVKPSGDSALSVDGK			90.09	1	853.077	2556.21	3	2556.22	-0.015	1	3.6e-09
	VIAWYDNEWGYSQR			86.58	1	894.404	1786.79	2	1785.81	0.983	0	7.6e-09
	AAALNIVPTSTGAAK			85.8	4	692.891	1383.77	2	1383.77	-0.005	0	8.1e-08
	VPTPNVSVVDLVVQVSK			84.35	3	594.009	1779.01	3	1779.01	-0.008	0	7.5e-08
	GILDVCDEPLVSVDFR			83.57	2	611.971	1832.89	3	1832.9	-0.005	0	1.5e-08
	TFAEEVNAAFR			83.33	6	627.808	1253.6	2	1253.6	-0.003	0	7.1e-08
	VPTPNVSVVDLVVQVSKK			76.92	1	477.786	1907.12	4	1907.11	0.008	1	6.5e-08
	DSPLDVVVINDTGGVK			68.13	1	814.423	1626.83	2	1626.85	-0.014	0	3.9e-05
	KTFAEEVNAAFR			65.47	1	461.572	1381.69	3	1381.7	-0.006	1	3.3e-05
	VAINGFGR			55.17	4	417.234	832.453	2	832.456	-0.002	0	0.00098
	AVALVLPNLK			55.15	6	519.337	1036.66	2	1036.66	-0.005	0	6.5e-05
	VIAWYDNEWGYSQR			53.91	1	596.273	1785.8	3	1785.81	-0.014	0	1.3e-05
	LNGIALR			53.34	4	378.739	755.463	2	755.465	-0.002	0	0.00062
	GTMTTTHSYTGDQR	Oxidation (M)	0.00400000000000.0	52.47	3	524.561	1570.66	3	1570.67	-0.006	0	1.4e-05
	VLITAPGK			48.45	3	399.756	797.498	2	797.501	-0.003	0	0.00082
AT1G67090.1	19				38
	LPLFGCTDSAQVLK			108.69	2	775.414	1548.81	2	1547.8	1.011	0	3.8e-09
	KFETLSYLPDLTDSELAKEVDYLIR			96.17	1	740.383	2957.5	4	2957.53	-0.023	2	9.6e-10
	KKFETLSYLPDLTDSELAK			77.46	1	550.293	2197.14	4	2197.15	-0.008	2	5.8e-08
	EHGNSPGYYDGR			73.43	1	676.286	1350.56	2	1350.56	-0.002	0	4.7e-07
	KFETLSYLPDLTDSELAK			70.2	1	690.691	2069.05	3	2069.06	-0.006	1	2.6e-07
	WIPCVEFELEHGFVYR			68.92	4	694.333	2079.98	3	2079.99	-0.012	0	3.4e-07
	QVQCISFIAYKPPSFTG			59.58	2	648.327	1941.96	3	1941.97	-0.006	1	7.8e-06
	IIGFDNTR			52.72	7	468.249	934.484	2	934.487	-0.004	0	0.001
	FETLSYLPDLTDSELAK			51.87	1	971.488	1940.96	2	1940.96	-0.001	0	1.4e-05
	KFETLSYLPDLTDSELAK			50.3	1	518.275	2069.07	4	2069.06	0.012	1	3e-05
	FETLSYLPDLTDSELAK			47.39	1	647.988	1940.94	3	1940.96	-0.02	0	3.6e-05
	EHGNSPGYYDGR	Glu->pyro-Glu (N-term E)	3.000000000000.0	43.66	1	667.281	1332.55	2	1332.55	-0.001	0	8.1e-05
	QVQCISFIAYKPPSFTG	Gln->pyro-Glu (N-term Q)	2.00000000000000000.0	43.49	1	963.477	1924.94	2	1924.94	0.001	1	8.4e-05
	EYPNAFIR			42.53	2	505.258	1008.5	2	1008.5	-0.002	0	0.033
	EVDYLIR			42.51	7	454.246	906.478	2	906.481	-0.003	0	0.002
	KEYPNAFIR			40.33	1	569.301	1136.59	2	1136.6	-0.01	1	0.015
	EVDYLIR	Glu->pyro-Glu (N-term E)	3.0000000.0	35.37	2	445.238	888.462	2	888.471	-0.009	0	0.0073
	EYPNAFIR	Glu->pyro-Glu (N-term E)	3.00000000.0	31.42	1	496.252	990.489	2	990.492	-0.003	0	0.015
	EHGNSPGYYDGR			27.57	1	451.197	1350.57	3	1350.56	0.01	0	0.0026
AT1G79920.1	19				24
	DFDEVLFNHFAAK			83.74	3	518.252	1551.73	3	1551.74	-0.002	0	3.4e-07
	GCALQCAILSPTFK			79.64	1	783.384	1564.75	2	1564.77	-0.021	0	7.3e-08
	FIGTAGAASTMMNPK	2 Oxidation (M)	0.000000000044000.0	78.67	1	764.861	1527.71	2	1527.71	0.001	0	4.2e-08
	FKDEYKIDVSQNAK			77.46	1	562.288	1683.84	3	1683.85	-0.005	2	1.3e-05
	SLPFSVTEGPDGYPLIHANYLGEIR			75	1	915.798	2744.37	3	2744.38	-0.01	0	9.3e-08
	NLNTAVVDCCIGIPVYFTDLQR			70.88	1	856.745	2567.21	3	2567.25	-0.038	0	2.7e-07
	GAATDAQNGGTENQQSTIVFPK			68.91	1	745.348	2233.02	3	2233.06	-0.039	0	3.5e-07
	AVEKEFEMALQDR	Oxidation (M)	0.0000000400000.0	65.56	1	791.383	1580.75	2	1580.75	0.001	1	2.1e-06
	GIDVVLNDESNR			63.71	1	665.834	1329.65	2	1329.65	0.001	0	2.4e-06
	ISTYTIGPFQSSK			62.15	1	714.869	1427.72	2	1427.73	-0.007	0	1.5e-06
	ILTEFFGKEPR			57.81	2	446.246	1335.72	3	1335.72	-0.002	1	5.1e-05
	SVVGFDFGNENCLVAVAR	Acetyl (Protein N-term)	1.000000000000000000.0	53.23	1	666	1994.98	3	1994.95	0.027	0	1e-05
	REEFEEISIPILER			52.96	2	587.308	1758.9	3	1758.91	-0.013	1	6.6e-05
	TNVPLSELVYGALK			52.67	2	752.418	1502.82	2	1502.83	-0.013	0	6e-05
	QFSDPELQR			50.7	1	560.271	1118.53	2	1118.54	-0.008	0	0.00056
	NAVESYVYDMR	Oxidation (M)	0.00000000040.0	48	1	682.309	1362.6	2	1361.59	1.012	0	3.4e-05
	AVEKEFEMALQDR	Oxidation (M)	0.0000000400000.0	39.65	1	528.26	1581.76	3	1580.75	1.009	1	0.00068
	GNPIPSVK			37.07	1	406.235	810.456	2	810.46	-0.004	0	0.0023
	ALSDAGLTVEDVHMVEVVGSGSR	Oxidation (M)	0.00000000000004000000000.0	32.91	1	782.04	2343.1	3	2343.14	-0.038	0	0.00082
AT2G04030.1	19				20
	DIEVLYLVEPIDEVAIQNLQTYK			101.18	1	902.468	2704.38	3	2704.42	-0.038	0	3.3e-10
	VFISDDFDGELFPR			92.14	1	828.894	1655.77	2	1655.78	-0.01	0	3.3e-08
	GVVDSDDLPLNVSR			81.4	1	743.889	1485.76	2	1484.75	1.017	0	1.9e-06
	TIEVEEDEPVKEGEEGEPK			78.38	1	714.987	2141.94	3	2141.99	-0.046	1	4.5e-08
	AQALGDTSSLEFMR	Oxidation (M)	0.00000000000040.0	75.24	1	771.359	1540.7	2	1540.72	-0.015	0	8.8e-08
	LLDLIVHSLYSHK			70.81	1	513.289	1536.85	3	1536.87	-0.021	0	2e-06
	ELVSNASDALDKLR			70.14	1	510.941	1529.8	3	1529.81	-0.004	1	2.7e-07
	NYSQFVGFPIYTWQEK			69.62	2	669.662	2005.96	3	2005.96	0.006	0	3e-07
	LSSSPCVLVSGK			62.98	1	617.326	1232.64	2	1232.64	-0.005	0	7.9e-06
	ILEINPDHPIIK			57.84	1	467.938	1400.79	3	1400.8	-0.012	0	2.1e-05
	FVDISKEDLELGDEDEVKDR			54.81	1	784.386	2350.14	3	2350.12	0.02	2	1.5e-05
	QEFNLLCDWIK			53.4	1	733.356	1464.7	2	1464.71	-0.009	0	4.3e-05
	EILQESR			48.82	1	437.734	873.453	2	873.456	-0.002	0	0.0039
	EDDKYEFAESTR			46.64	1	745.328	1488.64	2	1488.64	0.004	1	0.00029
	SAPFLEK			35.88	1	396.216	790.417	2	790.422	-0.005	0	0.033
	VVDLLYDTAIISSGFTPDSPAELGNK			33.7	1	681.61	2722.41	4	2721.38	1.034	0	0.00069
	NYSQFVGFPIYTWQEK			31.56	1	1003.98	2005.94	2	2005.96	-0.012	0	0.0011
	QYVWESVADSSSYLIR			28.35	1	634.988	1901.94	3	1901.92	0.027	0	0.0022
	ELVSNASDALDK			28.05	1	631.313	1260.61	2	1260.62	-0.007	0	0.0023
AT4G34450.1	19				20
	ELTPAITVLQLFLSSPR			135.81	1	629.027	1884.06	3	1884.07	-0.013	0	4.9e-13
	SALVQFHALALLHQIR			106.75	1	455.021	1816.06	4	1816.05	0.008	0	1.7e-10
	KPTGLGAPPAAPASGFDGYER			74.45	1	687.007	2058	3	2058.02	-0.017	1	1e-07
	SPLAQCLLIR			71.75	1	585.833	1169.65	2	1169.66	-0.007	0	3.2e-06
	IIDGTLLTQIER			71.12	1	686.39	1370.77	2	1370.78	-0.012	0	1.4e-05
	AIVDSIVTIIR			65.68	1	600.37	1198.73	2	1198.73	-0.002	0	1.1e-05
	VFNDPQVDPR			61.79	1	593.796	1185.58	2	1185.58	0	0	6.4e-06
	SIATLAITTLLK			58.21	2	622.891	1243.77	2	1243.78	-0.007	0	4e-06
	LLSSIPEFAAFGK			57.75	1	690.373	1378.73	2	1378.75	-0.018	0	9.5e-05
	ELTPAITVLQLFLSSPRPVLR			56.52	1	784.462	2350.36	3	2349.38	0.985	1	5e-06
	FGFMVESLKPR	Oxidation (M)	0.00040000000.0	55.74	1	442.9	1325.68	3	1325.68	-0.002	1	1.6e-05
	FSNTLTFVVK			55.68	1	578.318	1154.62	2	1154.63	-0.012	0	0.00056
	ALNSLPYDSPGQAFVVFEKPAGVPAVGK			51.89	1	953.488	2857.44	3	2857.5	-0.059	1	1.4e-05
	IVVVDAIR			49.82	1	442.782	883.549	2	883.549	0	0	0.00096
	LVGSLTR			47.27	1	373.226	744.437	2	744.449	-0.012	0	0.006
	YTSQVIR			43.84	1	433.732	865.45	2	865.466	-0.016	0	0.0049
	NYEPSEEAFDINSVPK			38.88	1	919.93	1837.85	2	1837.84	0.008	0	0.00023
	VGVSNFR			36.37	1	390.219	778.423	2	777.413	1.01	0	0.052
	AEDVSVAEAIHEIVASG			26.47	1	566.616	1696.83	3	1695.83	0.995	0	0.0084
AT1G56190.2	18				33
	ELDYLVGAVSNPK			105.19	2	702.87	1403.72	2	1403.73	-0.005	0	3.1e-09
	KLASLADLYVNDAFGTAHR			99.04	2	516.273	2061.06	4	2061.06	-0.002	1	7.6e-10
	FLKPSVAGFLLQK			87.36	6	483.291	1446.85	3	1446.86	-0.008	1	1.4e-07
	GVTTIIGGGDSVAAVEK			84.4	2	787.423	1572.83	2	1572.84	-0.004	0	6.3e-08
	ADLNVPLDDNQNITDDTR			81.6	1	1014.97	2027.92	2	2027.94	-0.014	0	3e-08
	LASLADLYVNDAFGTAHR			81.19	1	484.248	1932.96	4	1932.97	-0.008	0	3.7e-08
	RPFAAIVGGSK			73.63	1	551.813	1101.61	2	1101.63	-0.018	1	1.2e-05
	VILSTHLGRPK			70.97	1	610.874	1219.73	2	1219.74	-0.007	1	1.3e-06
	IGVIESLLEK			68.57	3	550.827	1099.64	2	1099.65	-0.009	0	2.5e-05
	VILSTHLGR			67.88	1	498.297	994.579	2	994.592	-0.013	0	1.6e-05
	GVSLLLPTDVVIADKFAPDANSK			64.18	1	790.759	2369.26	3	2369.28	-0.028	1	9.6e-07
	LASLADLYVNDAFGTAHR			62.03	2	645.336	1932.98	3	1932.97	0.015	0	1.5e-06
	VGVAGVMSHISTGGGASLELLEGK	Oxidation (M)	0.000000400000000000000000.0	56.38	1	762.389	2284.15	3	2284.17	-0.027	0	0.0016
	FSLAPLVPR			52.88	4	500.797	999.579	2	998.591	0.988	0	0.00018
	GVSLLLPTDVVIADK			50.36	1	770.446	1538.88	2	1538.89	-0.014	0	0.00013
	AAIPTIK			45.95	2	357.23	712.446	2	712.448	-0.002	0	0.00042
	RPFAAIVGGSK			35.69	1	368.216	1101.63	3	1101.63	-0.003	1	0.012
	ELDYLVGAVSNPK			27.94	1	468.918	1403.73	3	1403.73	0.002	0	0.0046
AT1G78900.1	18				19
	EDDLNEIVQLVGK			88.93	1	736.381	1470.75	2	1470.76	-0.009	0	2.4e-08
	DALAEGDKITLETAK			84.3	1	525.946	1574.82	3	1573.82	0.997	1	8.9e-08
	LAADTPLLTGQR			81.52	1	628.347	1254.68	2	1254.69	-0.014	0	2.9e-07
	TTLVANTSNMPVAAR	Oxidation (M)	0.000000000400000.0	75.56	1	781.389	1560.76	2	1560.79	-0.03	0	3.1e-07
	FEDPAEGEDTLVEK			70.31	1	789.866	1577.72	2	1577.71	0.007	0	8.7e-07
	LYDDLNAGFR			68.57	1	592.289	1182.56	2	1182.57	-0.004	0	9.7e-06
	NIIHFYNLANQAVER			68.26	1	601.654	1801.94	3	1800.93	1.012	0	3.8e-05
	ISGDVYIPR			55.07	2	510.277	1018.54	2	1018.54	-0.005	0	0.00019
	LGDLFYR			51.87	1	442.237	882.46	2	882.46	0	0	0.0011
	ITYIAPAGQYSLK			51.46	1	712.896	1423.78	2	1423.77	0.007	0	1.5e-05
	LAEMPADSGYPAYLAAR	Oxidation (M)	0.00040000000000000.0	49.26	1	906.433	1810.85	2	1810.86	-0.003	0	2.4e-05
	TVISQALSK			48.62	1	473.778	945.542	2	945.549	-0.007	0	0.0036
	LASFYER			46.04	1	443.236	884.458	2	884.439	0.019	0	0.0041
	YSTALESFYEK			44.3	1	669.33	1336.64	2	1336.62	0.026	0	0.0082
	THKPLSVELGPGILGNIFDGIQR			40.29	1	616.091	2460.34	4	2460.35	-0.014	1	0.00045
	VGHDNLIGEIIR			34.52	1	668.36	1334.71	2	1334.73	-0.024	0	0.00084
	FDPDFINIR			30.24	1	568.79	1135.57	2	1135.57	0	0	0.1
	ITYTLIK			28.95	1	426.259	850.503	2	850.516	-0.013	0	0.021
AT5G19820.1	18				19
	QSENAMAYDNAVSAVGK	Oxidation (M)	0.00000400000000000.0	127.49	1	885.896	1769.78	2	1769.79	-0.011	0	1.1e-12
	WAAINAIGQLSTDLGPDLQNQHHER			119.27	1	696.843	2783.34	4	2783.37	-0.03	0	1.1e-11
	NLDQVVSMVLSQFQSPHPR	Oxidation (M)	0.0000000400000000000.0	99.9	1	733.386	2197.14	3	2197.09	0.04	0	4.3e-10
	IAALNAVISFVQCLANSTER			95.38	1	726.706	2177.1	3	2176.13	0.966	0	1.1e-09
	SSAESLFNLAK			89.73	1	583.8	1165.59	2	1165.6	-0.012	0	5.2e-07
	QDVDLLGPNNQHLPK			70.95	1	563.297	1686.87	3	1686.87	-0.001	0	1.3e-06
	LSLSTQSSLK			66.84	1	532.299	1062.58	2	1062.59	-0.009	0	5.1e-05
	TILMNATDK	Oxidation (M)	0.000400000.0	57.42	1	512.257	1022.5	2	1021.51	0.989	0	3.8e-05
	VLPALAAAMDDFQNPR	Oxidation (M)	0.0000000040000000.0	57.02	1	582.304	1743.89	3	1743.86	0.028	0	2.8e-05
	AAVSAMPELMR	2 Oxidation (M)	0.00000400040.0	56.55	1	604.285	1206.56	2	1206.57	-0.018	0	1.9e-05
	LNVVIQLPNAR			48.96	1	618.867	1235.72	2	1235.73	-0.015	0	0.00014
	EGFFPWIDQVAPTLVPLLK			47.41	1	724.401	2170.18	3	2169.19	0.994	0	3.6e-05
	DVVTQETAGR			45.87	1	538.27	1074.53	2	1074.53	-0.006	0	0.0015
	LLVLLQNGK			45.31	1	499.326	996.638	2	996.633	0.004	0	0.0011
	SIVDEIK			37.97	2	402.228	802.442	2	802.444	-0.001	0	0.051
	LPQFIDR			33.28	1	445.243	888.472	2	887.486	0.985	0	0.16
	SIVDEIKQVMTASSSR			32.81	1	584.294	1749.86	3	1749.89	-0.034	1	0.0026
	AMAAVLLR	Oxidation (M)	0.04000000.0	28.03	1	430.749	859.483	2	859.495	-0.012	0	0.051
AT5G26742.1	18				24
	GTDALAAALAHLSGFSQPPSSR			125.26	1	718.697	2153.07	3	2153.09	-0.018	0	1.8e-12
	TILSDLITVYAK			82.29	3	668.883	1335.75	2	1335.77	-0.014	0	1.4e-07
	GLDIPNVDLVIHYELPNDPETFVHR			74.36	1	726.371	2901.45	4	2901.47	-0.013	0	1.1e-07
	LTEEAGDYTAFR			72.45	1	686.824	1371.63	2	1371.63	0.003	0	7.7e-06
	FTVLVATDVASR			71.2	1	639.847	1277.68	2	1277.7	-0.018	0	1.2e-05
	SVTGFLSDLYR			69.12	2	629.326	1256.64	2	1256.64	-0.003	0	1.9e-06
[truncated: 6,493 more rows]

## Sheet: Supplementary Data Set 1C
Supplementary Data Set 1. Proteins identified in an ABCE2:YFP co-immunoprecipitation assay
Supplementary Data Set 1C. Proteins identified in replicate 2
Protein	Description	Molecular weight (Da)	pI	Protein score	Peptide spectrum matches (PSMs)	Peptides	Exponentially modified protein abundance index (emPAI)	Coverage (%)
AT4G19210.1	| RNAse l inhibitor protein 2 | Chr4:10501906-10504776 FORWARD LENGTH=605 | 201606	69202	8.21	3727.23	145	50	10.22	56.4
AT5G56010.1	| heat shock protein 81-3 | Chr5:22681410-22683911 FORWARD LENGTH=699 | 201606	80287	4.95	3596.7	96	54	12.54	48.8
ATCG00490.1	| ribulose-bisphosphate carboxylase | ChrC:54958-56397 FORWARD LENGTH=479 | 201606	53435	5.88	2140.17	96	35	13.25	47.4
AT5G02500.1	| heat shock cognate protein 70-1 | Chr5:554055-556334 REVERSE LENGTH=651 | 201606	71712	5.03	3534.41	94	49	9.3	51.2
AT3G09440.1	| Heat shock protein 70 (Hsp 70) family protein | Chr3:2903434-2905632 REVERSE LENGTH=649 | 201606	71559	4.97	3390.78	85	45	8.75	50.8
AT5G56000.1	| HEAT SHOCK PROTEIN 81.4 | Chr5:22677602-22680067 REVERSE LENGTH=699 | 201606	80376	4.96	2857.73	82	43	7.02	39.8
AT3G12580.1	| heat shock protein 70 | Chr3:3991487-3993689 REVERSE LENGTH=650 | 201606	71456	5.14	2956.36	76	40	5.5	42.9
AT1G13440.1	| glyceraldehyde-3-phosphate dehydrogenase C2 | Chr1:4608465-4610494 REVERSE LENGTH=338 | 201606	37004	6.67	2351.6	75	33	19.86	68
AT3G04120.1	| glyceraldehyde-3-phosphate dehydrogenase C subunit 1 | Chr3:1081077-1083131 FORWARD LENGTH=338 | 201606	37005	6.62	2299.27	73	32	17.64	67.2
AT5G14740.2	| carbonic anhydrase 2 | Chr5:4760536-4762382 FORWARD LENGTH=259 | 201606	28668	5.36	2433.2	71	35	48.87	80.7
AT5G02490.1	| Heat shock protein 70 (Hsp 70) family protein | Chr5:550296-552565 REVERSE LENGTH=653 | 201606	71741	5.03	2593.51	69	34	4.12	40.4
AT5G62690.1	| tubulin beta chain 2 | Chr5:25181560-25183501 FORWARD LENGTH=450 | 201606	51385	4.7	1680.15	58	23	6.01	48.2
AT3G60750.1	| Transketolase | Chr3:22454004-22456824 FORWARD LENGTH=741 | 201606	80374	5.94	1915.13	53	28	3.08	39.7
AT3G26650.1	| glyceraldehyde 3-phosphate dehydrogenase A subunit | Chr3:9795226-9796848 FORWARD LENGTH=396 | 201606	42748	7.62	1569.13	52	23	7.53	49.2
AT5G23860.1	| tubulin beta 8 | Chr5:8042962-8044528 FORWARD LENGTH=449 | 201606	51258	4.73	1436.4	52	20	4.52	38.1
AT1G07920.1	| GTP binding Elongation factor Tu family protein | Chr1:2455559-2457001 FORWARD LENGTH=449 | 201606	49813	9.19	1291.21	51	23	7.1	39.2
AT3G01500.1	| carbonic anhydrase 1 | Chr3:194853-196716 REVERSE LENGTH=270 | 201606	29827	5.54	1776.24	50	27	23.43	78.1
AT2G29550.1	| tubulin beta-7 chain | Chr2:12644258-12645932 REVERSE LENGTH=449 | 201606	51341	4.74	1290.45	50	18	3.67	35.4
ATCG00480.1	| ATP synthase subunit beta | ChrC:52660-54156 REVERSE LENGTH=498 | 201606	53957	5.38	1919.79	49	27	5.92	49.8
C_GFP|eGFP	from pK7FWG2	27039	5.58	1323.58	49	17	10.56	53.1
AT1G20010.1	| tubulin beta-5 chain | Chr1:6938033-6940481 REVERSE LENGTH=449 | 201606	50880	4.66	1403.94	47	20	4.6	46.8
AT5G12250.1	| beta-6 tubulin | Chr5:3961317-3962971 REVERSE LENGTH=449 | 201606	51237	4.72	1373.02	47	20	4.99	41
AT3G08530.1	| Clathrin%2C heavy chain | Chr3:2587171-2595411 REVERSE LENGTH=1703 | 201606	194402	5.25	2580.46	46	42	1.58	28.5
ATCG00120.1	| ATP synthase subunit alpha | ChrC:9938-11461 REVERSE LENGTH=507 | 201606	55351	5.19	1667.13	46	25	6.09	41.8
AT4G20890.1	| tubulin beta-9 chain | Chr4:11182218-11183840 FORWARD LENGTH=444 | 201606	50310	4.69	1357.45	46	19	3.45	42.6
AT5G44340.1	| tubulin beta chain 4 | Chr5:17859442-17860994 REVERSE LENGTH=444 | 201606	50361	4.76	1299.57	46	18	3.08	39.9
AT3G11130.1	| Clathrin%2C heavy chain | Chr3:3482575-3491667 REVERSE LENGTH=1705 | 201606	194433	5.26	2375.39	43	39	1.47	26.6
AT1G75780.1	| tubulin beta-1 chain | Chr1:28451378-28453602 REVERSE LENGTH=447 | 201606	50755	4.68	1051.98	43	16	3.39	33.6
AT4G13940.1	| S-adenosyl-L-homocysteine hydrolase | Chr4:8054931-8056676 FORWARD LENGTH=485 | 201606	53971	5.66	1521.46	42	25	8.42	57.1
AT2G39730.2	| rubisco activase | Chr2:16571046-16573345 REVERSE LENGTH=446 | 201606	49354	7.55	1346.35	42	20	5.41	39.7
AT1G12900.1	| glyceraldehyde 3-phosphate dehydrogenase A subunit 2 | Chr1:4392634-4394283 REVERSE LENGTH=399 | 201606	43105	8.16	1349.71	42	19	5.92	44.9
AT1G56070.1	| Ribosomal protein S5/Elongation factor G/III/V family protein | Chr1:20968245-20971077 REVERSE LENGTH=843 | 201606	94743	5.89	2216.57	39	33	3.9	39.1
AT1G42970.1	| glyceraldehyde-3-phosphate dehydrogenase B subunit | Chr1:16127552-16129584 FORWARD LENGTH=447 | 201606	48086	6.33	1553.91	39	20	5.18	44.7
AT5G50920.1	| CLPC homologue 1 | Chr5:20715710-20719800 REVERSE LENGTH=929 | 201606	103616	6.36	2117.94	37	31	3.46	42.5
AT1G54270.1	| eif4a-2 | Chr1:20260495-20262018 FORWARD LENGTH=412 | 201606	47075	5.45	1371.53	36	21	6.67	51.9
AT3G13920.1	| eukaryotic translation initiation factor 4A1 | Chr3:4592635-4594128 REVERSE LENGTH=412 | 201606	46960	5.47	1424.09	36	21	6.05	47.3
AT1G04820.1	| tubulin alpha-4 chain | Chr1:1356421-1358266 REVERSE LENGTH=450 | 201606	50194	4.93	1813.45	35	25	5.77	55.1
AT5G17920.1	| Cobalamin-independent synthase family protein | Chr5:5935771-5939195 FORWARD LENGTH=765 | 201606	84646	6.09	1684.17	35	22	2.8	41.6
AT4G20360.1	| RAB GTPase homolog E1B | Chr4:10990036-10991466 FORWARD LENGTH=476 | 201606	51883	5.84	1285.5	35	17	2.93	46.2
AT5G52640.1	| heat shock-like protein | Chr5:21352557-21355147 FORWARD LENGTH=700 | 201606	80870	4.97	1035	35	17	1.41	19.4
AT4G14960.2	| Tubulin/FtsZ family protein | Chr4:8548769-8550319 REVERSE LENGTH=450 | 201606	50191	4.93	1705.34	34	24	5.23	55.1
AT3G12780.1	| phosphoglycerate kinase 1 | Chr3:4061127-4063140 REVERSE LENGTH=481 | 201606	50195	5.91	1592.8	33	21	5.23	55.1
AT1G55490.1	| chaperonin 60 beta | Chr1:20715717-20718673 REVERSE LENGTH=600 | 201606	64169	6.21	1518.56	32	24	4.09	42
AT4G14960.1	| Tubulin/FtsZ family protein | Chr4:8548753-8550319 REVERSE LENGTH=427 | 201606	47889	8.37	1482.56	30	20	3.8	51.5
AT3G09260.1	| Glycosyl hydrolase superfamily protein | Chr3:2840657-2843730 REVERSE LENGTH=524 | 201606	60196	6.45	1261.99	30	18	3.01	44.8
AT3G52930.1	| Aldolase superfamily protein | Chr3:19627383-19628874 REVERSE LENGTH=358 | 201606	38858	6.05	1559.72	29	23	6.65	52.2
AT3G13470.1	| TCP-1/cpn60 chaperonin family protein | Chr3:4389685-4392624 FORWARD LENGTH=596 | 201606	63702	5.6	1308.55	29	21	3.23	39.8
AT3G23810.1	| S-adenosyl-l-homocysteine (SAH) hydrolase 2 | Chr3:8588013-8589671 REVERSE LENGTH=485 | 201606	53809	5.49	1148.22	29	19	4.95	39.2
AT1G79930.1	| heat shock protein 91 | Chr1:30063781-30067067 REVERSE LENGTH=831 | 201606	92491	5.15	1491.72	28	24	2.1	34.5
AT5G19770.1	| tubulin alpha-3 | Chr5:6682761-6684474 REVERSE LENGTH=450 | 201606	50250	4.95	1197.93	28	19	3.83	36.9
AT5G22060.1	| DNAJ homologue 2 | Chr5:7303798-7305668 REVERSE LENGTH=419 | 201606	47036	6.69	1163.9	28	19	3.51	30.1
AT2G21390.1	| Coatomer%2C alpha subunit | Chr2:9152428-9156577 FORWARD LENGTH=1218 | 201606	137407	6.45	1526.86	27	25	1.57	28.7
AT5G38410.1	| Ribulose bisphosphate carboxylase (small chain) family protein | Chr5:15377501-15378306 REVERSE LENGTH=181 | 201606	20556	8.22	785.44	27	13	12.62	63.5
AT3G14420.1	| Aldolase-type TIM barrel family protein | Chr3:4821804-4823899 FORWARD LENGTH=367 | 201606	40373	9.16	976.33	26	18	5.39	53.4
AT3G44110.1	| DNAJ homologue 3 | Chr3:15869115-15871059 REVERSE LENGTH=420 | 201606	47042	5.76	1114.36	26	18	3.13	34.3
AT1G56190.2	| Phosphoglycerate kinase family protein | Chr1:21028622-21030454 FORWARD LENGTH=405 | 201606	42703	5.39	1083.06	26	15	3.76	53.1
AT1G67090.1	| ribulose bisphosphate carboxylase small chain 1A | Chr1:25048465-25049249 REVERSE LENGTH=180 | 201606	20488	7.59	791.99	26	13	10.14	60
AT3G03780.1	| methionine synthase 2 | Chr3:957602-960740 FORWARD LENGTH=765 | 201606	84873	6.09	1084.82	25	15	1.81	32.8
AT1G62020.1	| Coatomer%2C alpha subunit | Chr1:22919814-22923728 FORWARD LENGTH=1216 | 201606	137563	6.51	1312.56	24	22	1.42	23
AT3G48870.1	| Clp ATPase | Chr3:18122363-18126008 REVERSE LENGTH=952 | 201606	105902	6.06	1318.6	24	20	1.8	29.4
AT2G28000.1	| chaperonin-60alpha | Chr2:11926603-11929184 FORWARD LENGTH=586 | 201606	62205	5.09	1498.84	24	19	3.1	39.9
AT5G38430.1	| Ribulose bisphosphate carboxylase (small chain) family protein | Chr5:15384350-15385155 REVERSE LENGTH=181 | 201606	20558	7.59	575.61	24	10	10.14	63
AT1G16030.1	| heat shock protein 70B | Chr1:5502386-5504326 REVERSE LENGTH=646 | 201606	71270	5.3	941.75	23	10	0.34	16.1
AT2G36880.1	| methionine adenosyltransferase 3 | Chr2:15479721-15480893 REVERSE LENGTH=390 | 201606	42927	5.76	901.48	22	14	2.89	39.2
AT2G45290.1	| Transketolase | Chr2:18672737-18675589 FORWARD LENGTH=741 | 201606	80385	6.12	647.44	22	10	0.77	16.5
AT2G04030.1	| Chaperone protein htpG family protein | Chr2:1281983-1285909 FORWARD LENGTH=780 | 201606	89064	4.93	1292.8	21	19	1.81	35.1
AT5G26742.1	| DEAD box RNA helicase (RH3) | Chr5:9285540-9288871 REVERSE LENGTH=747 | 201606	81293	7.24	1056.93	21	17	1.66	28.4
AT5G28540.1	| heat shock protein 70 (Hsp 70) family protein | Chr5:10540665-10543274 REVERSE LENGTH=669 | 201606	73869	5.08	861.94	21	12	0.66	16.6
AT5G49910.1	| chloroplast heat shock protein 70-2 | Chr5:20303470-20306295 FORWARD LENGTH=718 | 201606	77064	5.17	976.9	20	17	1.52	22.4
AT1G09640.1	| Translation elongation factor EF1B%2C gamma chain | Chr1:3120162-3122152 FORWARD LENGTH=414 | 201606	46859	5.36	1080.23	20	16	3.15	37.2
AT3G14415.1	| Aldolase-type TIM barrel family protein | Chr3:4818667-4820748 FORWARD LENGTH=367 | 201606	40338	8.99	838.1	20	14	3.71	47.4
AT3G13640.1	| RNAse l inhibitor protein 1 | Chr3:4458751-4461323 REVERSE LENGTH=603 | 201606	69030	8.43	433.49	20	7	0.53	11.6
AT4G11420.1	| eukaryotic translation initiation factor 3A | Chr4:6947834-6952053 REVERSE LENGTH=987 | 201606	114571	9.21	872.33	19	17	1.16	25.2
AT4G34450.1	| coatomer gamma-2 subunit%2C putative / gamma-2 coat protein%2C putative / gamma-2 COP | Chr4:16471956-16476795 FORWARD LENGTH=886 | 201606	99113	5.06	936.43	19	17	1.33	25.4
AT1G79920.1	| Heat shock protein 70 (Hsp 70) family protein | Chr1:30059302-30062224 REVERSE LENGTH=736 | 201606	82523	8.76	883.16	19	15	1.37	29.2
AT1G72730.1	| DEA(D/H)-box RNA helicase family protein | Chr1:27378040-27379593 REVERSE LENGTH=414 | 201606	47083	5.16	654.29	19	10	2.16	33.1
AT4G31480.1	| Coatomer%2C beta subunit | Chr4:15264145-15267384 FORWARD LENGTH=948 | 201606	107161	5.59	971.15	18	17	1.1	21.1
AT1G57720.1	| Translation elongation factor EF1B%2C gamma chain | Chr1:21377873-21380114 FORWARD LENGTH=413 | 201606	46598	5.55	1277.6	18	16	4	46
AT2G39800.1	| delta1-pyrroline-5-carboxylate synthase 1 | Chr2:16598516-16602939 REVERSE LENGTH=717 | 201606	78110	5.89	1162	18	16	1.62	29.7
AT1G43170.1	| ribosomal protein 1 | Chr1:16266992-16268631 FORWARD LENGTH=389 | 201606	44816	10.18	680.62	18	15	3.42	34.7
AT1G79550.1	| phosphoglycerate kinase | Chr1:29924347-29926295 REVERSE LENGTH=401 | 201606	42162	5.49	1010.84	18	15	3.4	49.4
AT5G09810.1	| actin 7 | Chr5:3052809-3054220 FORWARD LENGTH=377 | 201606	41937	5.31	888.01	18	15	4.4	41.1
AT2G07698.1	| ATPase%2C F1 complex%2C alpha subunit protein | Chr2:3361474-3364028 FORWARD LENGTH=777 | 201606	86221	5.44	721.77	18	14	1.17	18.5
AT1G20620.1	| catalase 3 | Chr1:7143142-7146193 FORWARD LENGTH=492 | 201606	57059	7.31	703.53	18	13	1.41	30.3
AT2G17360.1	| Ribosomal protein S4 (RPS4A) family protein | Chr2:7546598-7548138 FORWARD LENGTH=261 | 201606	29898	10.18	678.71	17	15	13.01	62.8
AT4G24280.1	| chloroplast heat shock protein 70-1 | Chr4:12590094-12593437 FORWARD LENGTH=718 | 201606	76575	5.07	861.91	17	15	1.4	22.6
AT2G31610.1	| Ribosomal protein S3 family protein | Chr2:13450384-13451669 FORWARD LENGTH=250 | 201606	27673	9.57	954.59	17	14	13.87	54.4
AT3G53870.1	| Ribosomal protein S3 family protein | Chr3:19951547-19952782 FORWARD LENGTH=249 | 201606	27503	9.57	885.02	17	14	14.03	52.6
AT2G36460.1	| Aldolase superfamily protein | Chr2:15296929-15298387 REVERSE LENGTH=358 | 201606	38705	7.01	740.76	17	13	3.5	40.8
AT4G10340.1	| light harvesting complex of photosystem II 5 | Chr4:6408200-6409496 FORWARD LENGTH=280 | 201606	30195	6	996.52	17	13	3.53	48.9
AT5G58420.1	| Ribosomal protein S4 (RPS4A) family protein | Chr5:23619599-23620896 FORWARD LENGTH=262 | 201606	29911	10.22	627.13	16	14	13.01	62.6
AT1G07890.1	| ascorbate peroxidase 1 | Chr1:2438005-2439435 FORWARD LENGTH=250 | 201606	27829	5.72	858.26	16	12	7.03	55.6
AT5G35530.1	| Ribosomal protein S3 family protein | Chr5:13710355-13712192 REVERSE LENGTH=248 | 201606	27612	9.57	798.69	16	12	10.01	49.6
AT5G56500.1	| TCP-1/cpn60 chaperonin family protein | Chr5:22874058-22876966 FORWARD LENGTH=597 | 201606	63627	5.73	702.01	16	12	1.51	27
AT1G01320.1	| Tetratricopeptide repeat (TPR)-like superfamily protein | Chr1:121582-130099 REVERSE LENGTH=1797 | 201606	199620	5.92	913.66	15	15	0.43	11.9
AT1G65930.1	| cytosolic NADP+-dependent isocitrate dehydrogenase | Chr1:24539088-24541861 FORWARD LENGTH=410 | 201606	46059	6.13	851.18	15	15	3.66	41.2
AT5G07350.1	| TUDOR-SN protein 1 | Chr5:2320344-2324892 REVERSE LENGTH=991 | 201606	108624	6.92	824.72	15	15	0.93	18.7
AT1G62750.1	| Translation elongation factor EFG/EF2 protein | Chr1:23233622-23236321 REVERSE LENGTH=783 | 201606	86345	5.43	863.61	15	14	1.07	24.4
AT1G49240.1	| actin 8 | Chr1:18216539-18217947 FORWARD LENGTH=377 | 201606	42064	5.37	732.21	15	13	3	35
AT3G09840.1	| cell division cycle 48 | Chr3:3019494-3022832 FORWARD LENGTH=809 | 201606	90079	5.13	679.06	15	13	1.2	25.2
AT2G37620.1	| actin 1 | Chr2:15779761-15781241 FORWARD LENGTH=377 | 201606	42056	5.31	592.52	15	12	3	31.3
AT3G46520.1	| actin-12 | Chr3:17128567-17129981 FORWARD LENGTH=377 | 201606	41996	5.37	626.99	15	12	2.63	27.1
AT3G03960.1	| TCP-1/cpn60 chaperonin family protein | Chr3:1024432-1027604 FORWARD LENGTH=549 | 201606	59472	5.25	906.18	14	14	1.87	34.4
AT4G37930.1	| serine transhydroxymethyltransferase 1 | Chr4:17831891-17834742 REVERSE LENGTH=517 | 201606	57535	8.13	784.29	14	14	2.69	33.7
AT1G54040.2	| epithiospecifier protein | Chr1:20170995-20173885 REVERSE LENGTH=341 | 201606	37042	5.56	829.09	14	13	5.73	48.4
AT3G15730.1	| phospholipase D alpha 1 | Chr3:5330835-5333474 FORWARD LENGTH=810 | 201606	92246	5.53	757.45	14	12	0.89	20.9
AT1G02500.1	| S-adenosylmethionine synthetase 1 | Chr1:519037-520218 FORWARD LENGTH=393 | 201606	43587	5.51	686	14	11	2.15	36.6
AT3G12110.1	| actin-11 | Chr3:3858116-3859609 FORWARD LENGTH=377 | 201606	41876	5.23	578.33	14	11	2.65	27.1
AT3G08580.1	| ADP/ATP carrier 1 | Chr3:2605706-2607030 REVERSE LENGTH=381 | 201606	41563	9.84	638.81	14	10	2.33	28.6
AT1G50200.1	| Alanyl-tRNA synthetase | Chr1:18591429-18598311 REVERSE LENGTH=1003 | 201606	111275	6.05	809.23	13	13	1.05	19.1
AT2G32730.1	| 26S proteasome regulatory complex%2C non-ATPase subcomplex%2C Rpn2/Psmd1 subunit | Chr2:13880189-13885464 FORWARD LENGTH=1004 | 201606	109365	5.23	641.37	13	13	0.71	13.9
AT1G29880.1	| glycyl-tRNA synthetase / glycine-tRNA ligase | Chr1:10459662-10462781 REVERSE LENGTH=729 | 201606	82576	6.59	611.23	13	12	1.03	22.1
AT5G20290.1	| Ribosomal protein S8e family protein | Chr5:6851695-6853012 REVERSE LENGTH=222 | 201606	25092	10.32	807.72	13	11	3.41	47.3
AT1G64740.1	| alpha-1 tubulin | Chr1:24050114-24052296 FORWARD LENGTH=450 | 201606	50453	4.92	522.03	13	9	1.69	22.2
AT3G17390.1	| S-adenosylmethionine synthetase family protein | Chr3:5952484-5953665 REVERSE LENGTH=393 | 201606	43168	5.51	610.72	13	9	1.62	31.6
AT1G48600.1	| S-adenosyl-L-methionine-dependent methyltransferases superfamily protein | Chr1:17966448-17969077 FORWARD LENGTH=475 | 201606	54554	5.04	713.85	12	12	1.71	34.7
AT2G20580.1	| 26S proteasome regulatory subunit S2 1A | Chr2:8859211-8864699 FORWARD LENGTH=891 | 201606	98766	4.96	728.64	12	12	0.89	20.5
AT2G42600.1	| phosphoenolpyruvate carboxylase 2 | Chr2:17734541-17738679 REVERSE LENGTH=963 | 201606	110311	5.57	530.33	12	12	0.91	17.5
AT3G18190.1	| TCP-1/cpn60 chaperonin family protein | Chr3:6232226-6233836 FORWARD LENGTH=536 | 201606	58195	7.57	638.69	12	12	2.15	30.2
AT4G28080.1	| Tetratricopeptide repeat (TPR)-like superfamily protein | Chr4:13948993-13957840 REVERSE LENGTH=1819 | 201606	200475	5.81	697.71	12	12	0.34	9.5
AT5G02870.1	| Ribosomal protein L4/L1 family | Chr5:657830-659526 FORWARD LENGTH=407 | 201606	44808	10.31	830.15	12	12	2.67	36.9
AT5G61780.1	| TUDOR-SN protein 2 | Chr5:24822012-24826641 FORWARD LENGTH=985 | 201606	108131	6.2	803.13	12	12	0.72	17.9
AT1G52360.1	| Coatomer%2C beta~ subunit | Chr1:19499282-19505397 FORWARD LENGTH=926 | 201606	105370	4.84	544.03	12	11	0.82	17.3
AT3G15980.1	| Coatomer%2C beta~ subunit | Chr3:5411699-5418313 REVERSE LENGTH=909 | 201606	103438	4.84	566.05	12	11	0.84	17.5
AT5G08680.1	| ATP synthase alpha/beta family protein | Chr5:2821992-2824683 FORWARD LENGTH=559 | 201606	59993	6.06	730.34	12	10	1.15	30.6
AT2G47610.1	| Ribosomal protein L7Ae/L30e/S12e/Gadd45 family protein | Chr2:19529854-19531401 FORWARD LENGTH=257 | 201606	29339	10.14	591.12	12	9	3.74	36.6
AT3G11940.1	| ribosomal protein 5A | Chr3:3778175-3779354 REVERSE LENGTH=207 | 201606	23021	9.66	603.35	12	9	3.22	35.7
AT4G35090.1	| catalase 2 | Chr4:16700937-16703215 REVERSE LENGTH=492 | 201606	57237	6.63	576.26	12	9	1.23	29.3
AT1G66270.1	| Glycosyl hydrolase superfamily protein | Chr1:24700110-24702995 REVERSE LENGTH=524 | 201606	60025	6.55	264.8	12	5	0.63	12
AT1G20200.1	| PAM domain (PCI/PINT associated module) protein | Chr1:7001409-7004154 REVERSE LENGTH=488 | 201606	55890	8.35	644.73	11	11	1.84	29.7
AT1G74050.1	| Ribosomal protein L6 family protein | Chr1:27847256-27848680 REVERSE LENGTH=233 | 201606	26091	10.18	759.02	11	11	6.88	48.9
AT1G78900.1	| vacuolar ATP synthase subunit A | Chr1:29660463-29664575 FORWARD LENGTH=623 | 201606	69111	5.11	700.4	11	11	1.48	27.3
AT3G09630.1	| Ribosomal protein L4/L1 family | Chr3:2953813-2955444 FORWARD LENGTH=406 | 201606	44788	10.34	743.87	11	11	2.36	37.9
AT3G22890.1	| ATP sulfurylase 1 | Chr3:8112837-8114734 FORWARD LENGTH=463 | 201606	51484	6.34	608.45	11	11	1.44	23.3
AT4G35830.1	| aconitase 1 | Chr4:16973007-16977949 REVERSE LENGTH=898 | 201606	98774	5.98	526.38	11	11	1.06	16.7
AT5G42080.1	| dynamin-like protein | Chr5:16820661-16824536 REVERSE LENGTH=610 | 201606	68472	8.47	589.27	11	11	1.35	21.1
AT1G33120.1	| Ribosomal protein L6 family | Chr1:12010986-12012223 FORWARD LENGTH=194 | 201606	22118	9.48	603.96	11	10	6.82	53.1
AT3G12915.1	| Ribosomal protein S5/Elongation factor G/III/V family protein | Chr3:4112999-4115708 FORWARD LENGTH=820 | 201606	91905	5.78	583.72	11	10	0.65	13.5
AT3G52990.1	| Pyruvate kinase family protein | Chr3:19649046-19652237 FORWARD LENGTH=527 | 201606	57915	6.66	654.88	11	10	1.95	31.1
AT3G56150.1	| eukaryotic translation initiation factor 3C | Chr3:20833790-20836820 REVERSE LENGTH=900 | 201606	103283	5.21	579.39	11	10	0.63	16.9
AT4G04640.1	| ATPase%2C F1 complex%2C gamma subunit protein | Chr4:2350761-2351882 REVERSE LENGTH=373 | 201606	41171	8.13	722.29	11	10	2.04	34.3
AT5G35630.1	| glutamine synthetase 2 | Chr5:13831220-13833239 FORWARD LENGTH=430 | 201606	47780	6.43	564.86	11	10	1.85	22.1
AT4G31700.1	| ribosomal protein S6 | Chr4:15346306-15347714 REVERSE LENGTH=250 | 201606	28578	10.61	704.03	11	9	2.2	38.8
AT5G10360.1	| Ribosomal protein S6e | Chr5:3258734-3260142 REVERSE LENGTH=249 | 201606	28373	10.83	711.26	11	9	2.21	36.1
AT2G37270.1	| ribosomal protein 5B | Chr2:15647883-15649042 REVERSE LENGTH=207 | 201606	23090	9.69	498.23	11	8	2.5	26.6
AT3G05590.1	| ribosomal protein L18 | Chr3:1621511-1622775 FORWARD LENGTH=187 | 201606	20970	10.97	535.16	11	8	3.82	42.2
AT3G62870.1	| Ribosomal protein L7Ae/L30e/S12e/Gadd45 family protein | Chr3:23242862-23244273 REVERSE LENGTH=256 | 201606	29187	10.15	491.53	11	8	3.14	32.4
AT1G26630.1	| Eukaryotic translation initiation factor 5A-1 (eIF-5A 1) protein | Chr1:9205968-9207098 FORWARD LENGTH=159 | 201606	17358	5.55	450.49	11	7	4.27	47.8
AT1G61520.1	| PSI type III chlorophyll a/b-binding protein | Chr1:22700152-22701149 FORWARD LENGTH=273 | 201606	29163	8.61	499.3	11	7	1.35	22.7
AT2G18020.1	| Ribosomal protein L2 family | Chr2:7837151-7838160 FORWARD LENGTH=258 | 201606	28013	10.91	452.86	11	7	1.82	33.3
AT5G18380.1	| Ribosomal protein S5 domain 2-like superfamily protein | Chr5:6090253-6090693 REVERSE LENGTH=146 | 201606	16835	10.21	446.23	11	7	6.01	53.4
AT1G27400.1	| Ribosomal protein L22p/L17e family protein | Chr1:9515230-9516725 FORWARD LENGTH=176 | 201606	20056	10.12	275.52	11	5	1.79	35.2
AT1G29910.1	| chlorophyll A/B binding protein 3 | Chr1:10472443-10473246 REVERSE LENGTH=267 | 201606	28266	5.29	348.46	11	5	1.08	17.6
AT1G04810.1	| 26S proteasome regulatory complex%2C non-ATPase subcomplex%2C Rpn2/Psmd1 subunit | Chr1:1350304-1355261 FORWARD LENGTH=1001 | 201606	109254	5.19	482.49	10	10	0.58	12
AT1G18540.1	| Ribosomal protein L6 family protein | Chr1:6377448-6378548 REVERSE LENGTH=233 | 201606	26136	10.09	615.63	10	10	4.73	48.5
AT1G20260.1	| ATPase%2C V1 complex%2C subunit B protein | Chr1:7016971-7020290 FORWARD LENGTH=487 | 201606	54392	4.99	475.17	10	10	1.15	26.3
AT2G01250.1	| Ribosomal protein L30/L7 family protein | Chr2:132943-134264 REVERSE LENGTH=242 | 201606	28210	9.93	554.71	10	10	6.83	50.4
AT2G44120.2	| Ribosomal protein L30/L7 family protein | Chr2:18249227-18250417 REVERSE LENGTH=247 | 201606	28559	9.87	538.69	10	10	7.85	50.2
AT3G02360.1	| 6-phosphogluconate dehydrogenase family protein | Chr3:482498-483958 FORWARD LENGTH=486 | 201606	53829	7.02	609.76	10	10	2.2	30.5
AT3G14940.1	| phosphoenolpyruvate carboxylase 3 | Chr3:5025584-5029476 FORWARD LENGTH=968 | 201606	110661	5.73	435.44	10	10	0.64	12.6
AT3G16460.1	| Mannose-binding lectin superfamily protein | Chr3:5593029-5595522 FORWARD LENGTH=705 | 201606	72430	5.31	768.52	10	10	0.89	18.3
AT3G25230.1	| rotamase FKBP 1 | Chr3:9188257-9191137 FORWARD LENGTH=551 | 201606	61700	5.24	528.94	10	10	1.25	24.3
AT3G63460.1	| transducin family protein / WD-40 repeat family protein | Chr3:23431009-23437241 REVERSE LENGTH=1104 | 201606	120769	5	676.77	10	10	0.52	12.6
AT3G55610.1	| delta 1-pyrroline-5-carboxylate synthase 2 | Chr3:20624278-20628989 REVERSE LENGTH=726 | 201606	79164	6.35	567.01	10	9	0.99	19.7
AT4G09000.1	| general regulatory factor 1 | Chr4:5775387-5777157 FORWARD LENGTH=267 | 201606	30027	4.68	550.2	10	9	3.56	45.7
AT5G15200.1	| Ribosomal protein S4 | Chr5:4935124-4936334 REVERSE LENGTH=198 | 201606	23079	10.17	426.95	10	9	6.17	45.5
AT1G30230.1	| translation elongation factor EF1B/ribosomal protein S6 family protein | Chr1:10639286-10640515 FORWARD LENGTH=231 | 201606	25231	4.43	474.69	10	8	2.72	37.2
AT3G60770.1	| Ribosomal protein S13/S15 | Chr3:22460525-22461656 REVERSE LENGTH=151 | 201606	17142	10.39	463.57	10	8	5.84	57
AT4G00100.1	| ribosomal protein S13A | Chr4:37172-38123 FORWARD LENGTH=151 | 201606	17132	10.39	490.06	10	8	5.84	57
AT1G58380.1	| Ribosomal protein S5 family protein | Chr1:21689115-21690085 FORWARD LENGTH=284 | 201606	30950	10.26	441.98	10	7	2.34	37
AT2G20450.1	| Ribosomal protein L14 | Chr2:8813923-8815071 FORWARD LENGTH=134 | 201606	15497	10.12	503.35	10	7	5.34	43.3
AT2G41840.1	| Ribosomal protein S5 family protein | Chr2:17460016-17461398 REVERSE LENGTH=285 | 201606	31087	10.3	449.62	10	7	1.91	31.2
AT4G27090.1	| Ribosomal protein L14 | Chr4:13594104-13595187 REVERSE LENGTH=134 | 201606	15496	10.03	489.62	10	7	9.75	56
AT5G27850.1	| Ribosomal protein L18e/L15 superfamily protein | Chr5:9873169-9874297 FORWARD LENGTH=187 | 201606	21011	10.96	520.24	10	7	2.96	38.5
AT1G67430.1	| Ribosomal protein L22p/L17e family protein | Chr1:25262209-25263627 FORWARD LENGTH=175 | 201606	20013	10.12	240.97	10	4	1.81	29.1
AT2G34430.1	| light-harvesting chlorophyll-protein complex II subunit B1 | Chr2:14524818-14525618 FORWARD LENGTH=266 | 201606	28209	5.15	284.94	10	4	1.09	19.5
AT1G06950.1	| translocon at the inner envelope membrane of chloroplasts 110 | Chr1:2130303-2135563 REVERSE LENGTH=1016 | 201606	112565	5.73	547.25	9	9	0.56	12.7
AT1G08520.1	| ALBINA 1 | Chr1:2696538-2700819 FORWARD LENGTH=760 | 201606	83688	5.26	396.07	9	9	0.65	17
AT1G09340.1	| chloroplast RNA binding protein | Chr1:3015473-3018035 FORWARD LENGTH=378 | 201606	42764	8.19	546.84	9	9	1.92	33.3
AT1G10290.1	| dynamin-like protein 6 | Chr1:3370774-3377120 FORWARD LENGTH=914 | 201606	99391	9.09	421.47	9	9	0.8	19.6
AT1G18080.1	| Transducin/WD40 repeat-like superfamily protein | Chr1:6222325-6223901 FORWARD LENGTH=327 | 201606	36124	7.62	506.51	9	9	2.99	31.2
AT1G23310.1	| glutamate:glyoxylate aminotransferase | Chr1:8268720-8271329 REVERSE LENGTH=481 | 201606	53780	6.49	436.28	9	9	1.74	25.2
AT1G53310.1	| phosphoenolpyruvate carboxylase 1 | Chr1:19884261-19888070 REVERSE LENGTH=967 | 201606	110730	5.72	401.22	9	9	0.46	11.2
AT1G59610.1	| dynamin-like 3 | Chr1:21893413-21900780 FORWARD LENGTH=920 | 201606	100452	9.1	446.62	9	9	0.79	21.2
AT1G68010.1	| hydroxypyruvate reductase | Chr1:25493418-25495720 FORWARD LENGTH=386 | 201606	42449	6.68	503.15	9	9	1.42	31.9
AT2G15620.1	| nitrite reductase 1 | Chr2:6810552-6812666 FORWARD LENGTH=586 | 201606	65977	5.95	531.53	9	9	0.88	18.1
AT2G20140.1	| AAA-type ATPase family protein | Chr2:8692736-8694837 FORWARD LENGTH=443 | 201606	49487	5.85	414.24	9	9	1.13	19.2
AT3G07100.1	| Sec23/Sec24 protein transport family protein | Chr3:2245689-2250077 REVERSE LENGTH=1038 | 201606	114629	8.07	461.87	9	9	0.61	14
AT3G16420.1	| PYK10-binding protein 1 | Chr3:5579560-5580674 FORWARD LENGTH=298 | 201606	32138	5.46	659.14	9	9	2.63	39.9
AT3G58510.1	| DEA(D/H)-box RNA helicase family protein | Chr3:21640608-21643464 FORWARD LENGTH=612 | 201606	66327	6.23	555.59	9	9	1	23.2
AT4G10320.1	| tRNA synthetase class I (I%2C L%2C M and V) family protein | Chr4:6397526-6404509 REVERSE LENGTH=1190 | 201606	136368	5.94	442.11	9	9	0.36	11.8
AT4G16130.1	| arabinose kinase | Chr4:9120875-9127656 FORWARD LENGTH=1039 | 201606	115443	5.89	490.56	9	9	0.6	14.7
AT4G18480.1	| P-loop containing nucleoside triphosphate hydrolases superfamily protein | Chr4:10201897-10203361 REVERSE LENGTH=424 | 201606	46526	6.08	551.89	9	9	1.24	23.1
AT4G27440.1	| protochlorophyllide oxidoreductase B | Chr4:13725648-13727107 FORWARD LENGTH=401 | 201606	43560	9.23	601.54	9	9	1.6	21.9
AT4G28470.1	| 26S proteasome regulatory subunit S2 1B | Chr4:14067082-14072357 REVERSE LENGTH=891 | 201606	98576	5.08	521.84	9	9	0.53	14.8
AT4G38510.1	| ATPase%2C V1 complex%2C subunit B protein | Chr4:18011155-18014789 REVERSE LENGTH=487 | 201606	54385	5.03	423.89	9	9	0.99	24
AT5G20890.1	| TCP-1/cpn60 chaperonin family protein | Chr5:7087020-7089906 REVERSE LENGTH=527 | 201606	57763	5.59	445.2	9	9	1.22	23
AT5G26360.1	| TCP-1/cpn60 chaperonin family protein | Chr5:9255561-9258891 REVERSE LENGTH=555 | 201606	60872	5.56	498.96	9	9	0.85	19.5
AT5G27640.1	| translation initiation factor 3B1 | Chr5:9781207-9784759 REVERSE LENGTH=712 | 201606	81995	5.12	585.66	9	9	0.75	17.4
AT1G31330.1	| photosystem I subunit F | Chr1:11215011-11215939 REVERSE LENGTH=221 | 201606	24329	9.58	484.19	9	8	1.78	35.7
AT1G70410.1	| beta carbonic anhydrase 4 | Chr1:26534167-26536505 REVERSE LENGTH=258 | 201606	28737	6.66	452.55	9	8	2.17	34.5
AT2G21660.1	| cold%2C circadian rhythm%2C and rna binding 2 | Chr2:9265477-9266316 REVERSE LENGTH=176 | 201606	16937	5.85	645.5	9	8	4.44	44.3
AT3G48930.1	| Nucleic acid-binding%2C OB-fold-like protein | Chr3:18141017-18142189 REVERSE LENGTH=160 | 201606	18174	10.56	510.59	9	8	2.88	33.1
AT4G36130.1	| Ribosomal protein L2 family | Chr4:17097613-17098656 FORWARD LENGTH=258 | 201606	28159	10.83	349.12	9	6	1.42	26
AT1G23410.1	| Ribosomal protein S27a / Ubiquitin family protein | Chr1:8314940-8315410 FORWARD LENGTH=156 | 201606	17889	9.77	285	9	5	2.98	28.8
AT1G66280.1	| Glycosyl hydrolase superfamily protein | Chr1:24706759-24709737 REVERSE LENGTH=524 | 201606	60142	6.74	147.76	9	3	0.41	9.5
AT2G05070.1	| photosystem II light harvesting complex protein 2.2 | Chr2:1799436-1800329 REVERSE LENGTH=265 | 201606	28659	5.29	170.43	9	3	0.54	11.3
AT1G09620.1	| ATP binding/leucine-tRNA ligases/aminoacyl-tRNA ligase | Chr1:3113077-3116455 REVERSE LENGTH=1091 | 201606	124513	5.74	415.78	8	8	0.45	10.7
AT1G11860.1	| Glycine cleavage T-protein family | Chr1:4001801-4003245 FORWARD LENGTH=408 | 201606	44759	8.55	594.82	8	8	1.54	33.1
AT1G24510.1	| TCP-1/cpn60 chaperonin family protein | Chr1:8685504-8688101 REVERSE LENGTH=535 | 201606	59860	5.46	409.71	8	8	1.01	17.6
AT1G73600.1	| S-adenosyl-L-methionine-dependent methyltransferases superfamily protein | Chr1:27670825-27673400 FORWARD LENGTH=490 | 201606	56902	5.34	528.25	8	8	1.08	23.7
AT2G16950.1	| transportin 1 | Chr2:7353939-7360637 FORWARD LENGTH=895 | 201606	100826	4.81	454.03	8	8	0.51	11.6
AT3G01780.1	| ARM repeat superfamily protein | Chr3:279171-283399 FORWARD LENGTH=1176 | 201606	132251	5.67	362.98	8	8	0.33	7.9
AT3G02200.2	| Proteasome component (PCI) domain protein | Chr3:406692-408919 FORWARD LENGTH=417 | 201606	47097	5.06	341.17	8	8	1.42	23.7
AT3G11710.1	| lysyl-tRNA synthetase 1 | Chr3:3702359-3705613 REVERSE LENGTH=626 | 201606	71242	5.9	329.33	8	8	0.7	17.1
AT3G18000.1	| S-adenosyl-L-methionine-dependent methyltransferases superfamily protein | Chr3:6154578-6157331 FORWARD LENGTH=491 | 201606	56694	5.39	432.15	8	8	1.42	27.3
AT3G47520.1	| malate dehydrogenase | Chr3:17513657-17514868 FORWARD LENGTH=403 | 201606	42607	8.66	509.23	8	8	1.19	25.8
AT4G39330.1	| cinnamyl alcohol dehydrogenase 9 | Chr4:18291268-18292772 FORWARD LENGTH=360 | 201606	39365	6.21	645.81	8	8	1.59	35.3
AT5G26710.1	| Glutamyl/glutaminyl-tRNA synthetase%2C class Ic | Chr5:9305673-9308247 FORWARD LENGTH=719 | 201606	81527	6.61	449.37	8	8	0.76	17.7
AT5G55220.1	| trigger factor type chaperone family protein | Chr5:22397677-22400678 FORWARD LENGTH=547 | 201606	62151	5.25	395.36	8	8	0.83	15.5
AT5G58290.1	| regulatory particle triple-A ATPase 3 | Chr5:23569155-23571116 FORWARD LENGTH=408 | 201606	45894	5.42	537.61	8	8	1.72	29.4
AT5G65010.1	| asparagine synthetase 2 | Chr5:25969224-25972278 FORWARD LENGTH=578 | 201606	65559	6.01	511.08	8	8	1.15	25.8
AT1G14320.1	| Ribosomal protein L16p/L10e family protein | Chr1:4888270-4889408 FORWARD LENGTH=220 | 201606	25357	10.5	393.63	8	7	3.36	38.2
AT5G10450.1	| G-box regulating factor 6 | Chr5:3284452-3286261 REVERSE LENGTH=248 | 201606	28072	4.77	422.11	8	7	1.81	25.8
AT5G30510.1	| ribosomal protein S1 | Chr5:11619262-11621223 REVERSE LENGTH=416 | 201606	45310	5.13	355.58	8	7	1.29	24.3
AT5G38480.1	| general regulatory factor 3 | Chr5:15410277-15411285 FORWARD LENGTH=255 | 201606	28702	4.75	296.46	8	7	1.74	21.6
AT5G65430.1	| general regulatory factor 8 | Chr5:26148546-26150255 REVERSE LENGTH=248 | 201606	28125	4.82	382.51	8	7	1.81	25.8
ATCG00800.1	| structural constituent of ribosome | ChrC:82826-83482 REVERSE LENGTH=218 | 201606	25344	9.51	451.98	8	7	3.36	39
AT1G52570.1	| phospholipase D alpha 2 | Chr1:19583940-19586551 REVERSE LENGTH=810 | 201606	92167	5.82	390.4	8	6	0.37	9.6
AT1G20630.1	| catalase 1 | Chr1:7146812-7149609 FORWARD LENGTH=492 | 201606	57068	6.95	260.88	8	5	0.34	9.8
AT2G37190.1	| Ribosomal protein L11 family protein | Chr2:15619559-15620059 REVERSE LENGTH=166 | 201606	18045	9.05	377.2	8	5	2.12	42.8
AT3G25520.1	| ribosomal protein L5 | Chr3:9269573-9271327 REVERSE LENGTH=301 | 201606	34394	9.32	397.96	8	5	1.63	25.9
AT1G03630.1	| protochlorophyllide oxidoreductase C | Chr1:907699-909245 FORWARD LENGTH=401 | 201606	44084	9.18	306.31	7	7	1.34	21.4
AT1G05190.1	| Ribosomal protein L6 family | Chr1:1502515-1503738 REVERSE LENGTH=223 | 201606	24747	9.89	385.52	7	7	2.22	41.3
AT1G30630.1	| Coatomer epsilon subunit | Chr1:10858546-10860173 REVERSE LENGTH=292 | 201606	32809	5.33	446.22	7	7	1.42	26.7
AT1G32060.1	| phosphoribulokinase | Chr1:11532668-11534406 FORWARD LENGTH=395 | 201606	44721	5.71	407.44	7	7	0.92	23
AT1G74910.1	| ADP-glucose pyrophosphorylase family protein | Chr1:28135770-28138456 REVERSE LENGTH=415 | 201606	45934	6.76	412	7	7	1.07	22.2
AT2G22125.1	| binding protein | Chr2:9406793-9414223 FORWARD LENGTH=2150 | 201606	232956	5.21	308.01	7	7	0.24	6.8
AT2G35840.1	| Sucrose-6F-phosphate phosphohydrolase family protein | Chr2:15053952-15055776 FORWARD LENGTH=422 | 201606	48053	6.13	407.63	7	7	1.18	35.5
AT2G36160.1	| Ribosomal protein S11 family protein | Chr2:15169925-15171159 FORWARD LENGTH=150 | 201606	16304	10.6	418.19	7	7	4.82	46
AT2G42520.1	| P-loop containing nucleoside triphosphate hydrolases superfamily protein | Chr2:17705382-17708744 FORWARD LENGTH=633 | 201606	67813	6.63	404.98	7	7	0.64	15.3
AT2G46280.1	| TGF-beta receptor interacting protein 1 | Chr2:19003656-19005393 REVERSE LENGTH=328 | 201606	36651	6.5	419.86	7	7	2.11	33.2
AT3G02760.1	| Class II aaRS and biotin synthetases superfamily protein | Chr3:597588-600650 REVERSE LENGTH=883 | 201606	98445	6.1	325.32	7	7	0.6	11.8
AT3G05530.1	| regulatory particle triple-A ATPase 5A | Chr3:1603540-1605993 FORWARD LENGTH=424 | 201606	47735	4.91	347.58	7	7	1.4	29
AT3G07110.1	| Ribosomal protein L13 family protein | Chr3:2252092-2253332 FORWARD LENGTH=206 | 201606	23679	10.41	539.04	7	7	3.05	39.3
AT3G11830.1	| TCP-1/cpn60 chaperonin family protein | Chr3:3732734-3736156 FORWARD LENGTH=557 | 201606	60195	6.03	284.3	7	7	0.74	17.1
AT3G20050.1	| T-complex protein 1 alpha subunit | Chr3:6998544-7002266 REVERSE LENGTH=545 | 201606	59477	5.93	415.32	7	7	0.88	20.2
AT3G24830.1	| Ribosomal protein L13 family protein | Chr3:9064613-9065871 FORWARD LENGTH=206 | 201606	23729	10.35	493.78	7	7	4.7	47.6
AT3G52140.1	| tetratricopeptide repeat (TPR)-containing protein | Chr3:19333232-19341295 FORWARD LENGTH=1403 | 201606	154652	5.95	403.61	7	7	0.21	5.6
AT3G59970.3	| methylenetetrahydrofolate reductase 1 | Chr3:22151303-22154323 FORWARD LENGTH=592 | 201606	66817	5.56	341.6	7	7	0.65	17.4
AT4G04910.1	| AAA-type ATPase family protein | Chr4:2489696-2495666 REVERSE LENGTH=742 | 201606	81949	5.74	299.74	7	7	0.43	11.1
AT4G14680.1	| Pseudouridine synthase/archaeosine transglycosylase-like family protein | Chr4:8413443-8415311 REVERSE LENGTH=465 | 201606	52054	6.88	409.9	7	7	0.9	16.8
AT4G29060.1	| elongation factor Ts family protein | Chr4:14317744-14321315 FORWARD LENGTH=953 | 201606	104174	4.95	360.5	7	7	0.44	14.2
AT4G30190.1	| H[+]-ATPase 2 | Chr4:14770820-14775920 REVERSE LENGTH=948 | 201606	104734	6.54	345.88	7	7	0.32	8.9
AT4G30530.1	| Class I glutamine amidotransferase-like superfamily protein | Chr4:14920605-14922286 FORWARD LENGTH=250 | 201606	28653	5.46	401.81	7	7	2.18	32.4
AT5G05010.1	| clathrin adaptor complexes medium subunit family protein | Chr5:1477137-1479872 FORWARD LENGTH=527 | 201606	57853	5.63	450.17	7	7	0.66	18.2
AT5G19820.1	| ARM repeat superfamily protein | Chr5:6695731-6701247 REVERSE LENGTH=1116 | 201606	125058	4.77	475.3	7	7	0.55	14.2
AT5G36230.1	| ARM repeat superfamily protein | Chr5:14273519-14276773 FORWARD LENGTH=411 | 201606	47357	5.51	377.84	7	7	0.85	22.9
AT5G41670.1	| 6-phosphogluconate dehydrogenase family protein | Chr5:16665647-16667110 REVERSE LENGTH=487 | 201606	53626	5.62	367.67	7	7	1.54	23.6
AT5G43780.1	| Pseudouridine synthase/archaeosine transglycosylase-like family protein | Chr5:17589631-17591480 REVERSE LENGTH=469 | 201606	52150	8.89	379.11	7	7	0.75	16
AT5G66420.2	| TIM-barrel signal transduction protein | Chr5:26521893-26524986 REVERSE LENGTH=754 | 201606	81410	5.52	391.9	7	7	0.76	15
AT1G22300.1	| general regulatory factor 10 | Chr1:7879146-7881103 REVERSE LENGTH=254 | 201606	29011	4.73	391.19	7	6	1.36	22.4
AT1G22780.1	| Ribosomal protein S13/S18 family | Chr1:8067990-8069163 FORWARD LENGTH=152 | 201606	17591	10.54	373.25	7	6	3.08	51.3
AT1G35160.1	| GF14 protein phi chain | Chr1:12867264-12868514 FORWARD LENGTH=267 | 201606	30289	4.79	299.56	7	6	1.27	16.5
AT1G53750.1	| regulatory particle triple-A 1A | Chr1:20065921-20068324 REVERSE LENGTH=426 | 201606	48286	6.33	311.75	7	6	1.18	25.8
AT1G72370.1	| 40s ribosomal protein SA | Chr1:27243148-27244842 REVERSE LENGTH=298 | 201606	32499	5.05	378.01	7	6	1.15	25.2
AT1G78300.1	| general regulatory factor 2 | Chr1:29461883-29463052 FORWARD LENGTH=259 | 201606	29258	4.71	274.75	7	6	2.1	30.1
AT2G09990.1	| Ribosomal protein S5 domain 2-like superfamily protein | Chr2:3781442-3781882 FORWARD LENGTH=146 | 201606	16849	10.21	359.79	7	6	4.5	52.1
AT2G19730.1	| Ribosomal L28e protein family | Chr2:8511752-8512995 FORWARD LENGTH=143 | 201606	15943	10.58	425.24	7	6	3.67	48.3
AT2G21170.1	| triosephosphate isomerase | Chr2:9071047-9073106 REVERSE LENGTH=315 | 201606	33553	7.67	343.12	7	6	1.1	23.5
AT2G42590.1	| general regulatory factor 9 | Chr2:17732118-17733775 REVERSE LENGTH=263 | 201606	29616	4.86	294.64	7	6	1.32	21.7
AT3G08740.1	| elongation factor P (EF-P) family protein | Chr3:2654788-2656154 REVERSE LENGTH=236 | 201606	26439	8.61	384.13	7	6	2.51	31.8
AT3G11510.1	| Ribosomal protein S11 family protein | Chr3:3623757-3624866 REVERSE LENGTH=150 | 201606	16320	10.6	388.86	7	6	4.82	46
AT3G49010.1	| breast basic conserved 1 | Chr3:18166971-18168047 REVERSE LENGTH=206 | 201606	23752	11.02	372.22	7	6	3.03	38.3
AT4G16155.1	| dihydrolipoamide dehydrogenase | Chr4:9153570-9157133 REVERSE LENGTH=567 | 201606	60564	7.29	282.55	7	6	0.62	16
AT5G60600.1	| 4-hydroxy-3-methylbut-2-enyl diphosphate synthase | Chr5:24359447-24363274 FORWARD LENGTH=741 | 201606	82832	6.01	410.57	7	6	0.74	13.4
AT5G60790.1	| ABC transporter family protein | Chr5:24453760-24455767 REVERSE LENGTH=595 | 201606	67356	6.03	318.14	7	6	0.75	16.8
AT1G10630.1	| ADP-ribosylation factor A1F | Chr1:3513189-3514230 REVERSE LENGTH=181 | 201606	20667	6.43	352.67	7	5	2.32	34.8
AT2G39390.1	| Ribosomal L29 family protein | Chr2:16450803-16451762 REVERSE LENGTH=123 | 201606	14222	10.92	261.53	7	5	3.22	35.8
AT4G26530.1	| Aldolase superfamily protein | Chr4:13391566-13392937 FORWARD LENGTH=358 | 201606	38555	5.65	348.03	7	5	0.91	20.4
AT1G02080.1	| transcription regulator | Chr1:373335-386682 FORWARD LENGTH=2431 | 201606	271827	5.39	243.87	6	6	0.11	4.3
AT1G19920.1	| Pseudouridine synthase/archaeosine transglycosylase-like family protein | Chr1:6914835-6916657 REVERSE LENGTH=476 | 201606	53718	6.15	287.84	6	6	0.72	12
AT1G63940.1	| monodehydroascorbate reductase 6 | Chr1:23730206-23733534 FORWARD LENGTH=486 | 201606	52754	7.05	442.46	6	6	0.88	26.1
AT1G64190.1	| 6-phosphogluconate dehydrogenase family protein | Chr1:23825549-23827012 REVERSE LENGTH=487 | 201606	53686	5.34	382.47	6	6	1.35	22
AT1G64790.1	| ILITYHIA | Chr1:24065232-24081908 REVERSE LENGTH=2610 | 201606	286993	6.77	254.23	6	6	0.14	3.8
AT1G64790.2	| ILITYHIA | Chr1:24065232-24083403 REVERSE LENGTH=2696 | 201606	296341	6.45	254.23	6	6	0.12	3.7
AT1G78570.1	| rhamnose biosynthesis 1 | Chr1:29550110-29552207 FORWARD LENGTH=669 | 201606	75837	6.84	319.17	6	6	0.64	15.5
AT2G30860.1	| glutathione S-transferase PHI 9 | Chr2:13139132-13140057 FORWARD LENGTH=215 | 201606	24131	6.17	345.42	6	6	1.36	29.3
AT2G36530.1	| Enolase | Chr2:15321081-15323786 REVERSE LENGTH=444 | 201606	47974	5.54	503.38	6	6	0.84	21.2
AT2G39770.1	| Glucose-1-phosphate adenylyltransferase family protein | Chr2:16589401-16590741 FORWARD LENGTH=361 | 201606	39837	6.28	214.88	6	6	0.87	18.8
AT2G40290.1	| Eukaryotic translation initiation factor 2 subunit 1 | Chr2:16829030-16830889 REVERSE LENGTH=344 | 201606	39008	5.08	363.92	6	6	1.35	24.4
AT3G18130.1	| receptor for activated C kinase 1C | Chr3:6211109-6212371 REVERSE LENGTH=326 | 201606	36204	6.66	312.5	6	6	2.54	30.7
AT3G48990.1	| AMP-dependent synthetase and ligase family protein | Chr3:18159031-18161294 REVERSE LENGTH=514 | 201606	55738	6.08	363.26	6	6	0.69	16.1
AT3G58610.1	| ketol-acid reductoisomerase | Chr3:21671561-21674639 FORWARD LENGTH=591 | 201606	64172	6.36	370.12	6	6	0.68	12.7
AT4G11150.1	| vacuolar ATP synthase subunit E1 | Chr4:6800091-6801696 FORWARD LENGTH=230 | 201606	26272	6.04	282.25	6	6	2.52	35.2
AT4G13780.1	| methionine-tRNA ligase%2C putative / methionyl-tRNA synthetase%2C putative / MetRS | Chr4:7993366-7998433 REVERSE LENGTH=797 | 201606	91051	6.64	288.06	6	6	0.44	11
AT4G13930.1	| serine hydroxymethyltransferase 4 | Chr4:8048013-8050021 REVERSE LENGTH=471 | 201606	52141	6.8	342.44	6	6	0.9	20.8
AT4G14160.1	| Sec23/Sec24 protein transport family protein | Chr4:8167574-8173026 FORWARD LENGTH=773 | 201606	86292	5.64	354.48	6	6	0.47	14.7
AT4G24820.1	| 26S proteasome regulatory subunit Rpn7 | Chr4:12790471-12792599 REVERSE LENGTH=387 | 201606	44425	5.71	438	6	6	0.93	21.4
AT4G38970.1	| fructose-bisphosphate aldolase 2 | Chr4:18163714-18165659 REVERSE LENGTH=398 | 201606	43132	6.78	344.65	6	6	0.96	18.6
AT5G09900.1	| 26S proteasome regulatory subunit%2C putative (RPN5) | Chr5:3089462-3092434 REVERSE LENGTH=442 | 201606	51204	7.05	290.04	6	6	0.63	14.5
AT5G13630.1	| magnesium-chelatase subunit chlH%2C chloroplast%2C putative / Mg-protoporphyrin IX chelatase%2C putative (CHLH) | Chr5:4387567-4392082 REVERSE LENGTH=1381 | 201606	153934	5.8	288.44	6	6	0.24	7.1
AT5G25754.1	| RNA polymerase I-associated factor PAF67 | Chr5:8953564-8955511 FORWARD LENGTH=514 | 201606	60657	5.88	284.25	6	6	0.86	15.2
AT5G43940.1	| GroES-like zinc-binding dehydrogenase family protein | Chr5:17684265-17686379 FORWARD LENGTH=379 | 201606	41528	6.51	316.19	6	6	1.23	24.3
AT5G45620.1	| Proteasome component (PCI) domain protein | Chr5:18501590-18503868 FORWARD LENGTH=386 | 201606	44368	5.17	330.48	6	6	0.76	18.4
AT5G45930.1	| magnesium chelatase i2 | Chr5:18628095-18629565 FORWARD LENGTH=418 | 201606	46468	5.36	338.63	6	6	0.71	21.5
AT5G46290.1	| 3-ketoacyl-acyl carrier protein synthase I | Chr5:18774439-18776629 REVERSE LENGTH=473 | 201606	50895	8.29	442.48	6	6	0.63	15.4
AT5G62790.1	| 1-deoxy-D-xylulose 5-phosphate reductoisomerase | Chr5:25214358-25217292 REVERSE LENGTH=477 | 201606	52273	6.58	269.15	6	6	1.05	25.8
AT1G25490.1	| ARM repeat superfamily protein | Chr1:8951700-8954899 FORWARD LENGTH=588 | 201606	66307	4.94	320	6	5	0.37	10.9
AT1G66580.1	| senescence associated gene 24 | Chr1:24839208-24840439 FORWARD LENGTH=221 | 201606	25312	10.57	309.93	6	5	2.7	33
AT2G16600.2	| rotamase CYP 3 | Chr2:7200862-7201383 FORWARD LENGTH=151 | 201606	16153	6.11	268.56	6	5	2.55	36.4
AT2G40510.1	| Ribosomal protein S26e family protein | Chr2:16918506-16919623 FORWARD LENGTH=133 | 201606	15174	11.09	365.56	6	5	2.85	39.1
AT2G40590.1	| Ribosomal protein S26e family protein | Chr2:16945215-16946345 REVERSE LENGTH=131 | 201606	15062	11.09	337.66	6	5	2.89	38.2
AT2G42740.1	| ribosomal protein large subunit 16A | Chr2:17791794-17792946 FORWARD LENGTH=182 | 201606	20989	9.94	318.56	6	5	2.25	32.4
AT3G04840.1	| Ribosomal protein S3Ae | Chr3:1329751-1331418 FORWARD LENGTH=262 | 201606	30060	9.78	395.94	6	5	1.63	36.6
AT3G09820.1	| adenosine kinase 1 | Chr3:3012122-3014624 FORWARD LENGTH=344 | 201606	38268	5.29	291.27	6	5	0.92	18.9
AT3G16950.1	| lipoamide dehydrogenase 1 | Chr3:5786761-5790383 REVERSE LENGTH=570 | 201606	61004	8.13	249.92	6	5	0.41	11.6
AT3G47470.1	| light-harvesting chlorophyll-protein complex I subunit A4 | Chr3:17493622-17494773 REVERSE LENGTH=251 | 201606	27773	6.22	354.1	6	5	1.45	33.1
AT4G15000.1	| Ribosomal L27e protein family | Chr4:8571896-8572303 FORWARD LENGTH=135 | 201606	15712	10.26	251.3	6	5	2.67	45.9
AT4G23680.1	| Polyketide cyclase/dehydrase and lipid transport superfamily protein | Chr4:12336416-12337417 REVERSE LENGTH=151 | 201606	17520	5.89	275.06	6	5	3.08	45
AT4G34200.1	| D-3-phosphoglycerate dehydrogenase | Chr4:16374041-16376561 REVERSE LENGTH=603 | 201606	63571	6.16	289.76	6	5	0.39	11.4
AT5G15490.1	| UDP-glucose 6-dehydrogenase family protein | Chr5:5027872-5029314 REVERSE LENGTH=480 | 201606	53653	5.76	333.51	6	5	0.48	13.5
AT5G19510.1	| Translation elongation factor EF1B/ribosomal protein S6 family protein | Chr5:6581854-6583137 REVERSE LENGTH=224 | 201606	24243	4.42	386.74	6	5	1.35	37.9
AT5G47770.1	| farnesyl diphosphate synthase 1 | Chr5:19345297-19347415 FORWARD LENGTH=384 | 201606	44860	6.57	241.15	6	5	0.59	15.6
AT1G09430.1	| ATP-citrate lyase A-3 | Chr1:3042135-3044978 FORWARD LENGTH=424 | 201606	47315	5.16	192.81	6	4	0.42	12
AT1G10670.1	| ATP-citrate lyase A-1 | Chr1:3535787-3538098 FORWARD LENGTH=423 | 201606	46991	5.39	186.67	6	4	0.56	15.1
AT2G21130.1	| Cyclophilin-like peptidyl-prolyl cis-trans isomerase family protein | Chr2:9055619-9056143 REVERSE LENGTH=174 | 201606	18680	8.33	257.83	6	4	1.42	25.9
AT3G49910.1	| Translation protein SH3-like family protein | Chr3:18504311-18504751 FORWARD LENGTH=146 | 201606	16934	10.79	287.86	6	4	2.35	28.1
AT3G57490.1	| Ribosomal protein S5 family protein | Chr3:21279824-21280887 REVERSE LENGTH=276 | 201606	30325	10.19	253.47	6	4	0.98	17.8
AT4G34870.1	| rotamase cyclophilin 5 | Chr4:16614451-16614969 FORWARD LENGTH=172 | 201606	18594	8.9	240.37	6	4	3.69	48.8
AT4G38740.1	| rotamase CYP 1 | Chr4:18083620-18084138 REVERSE LENGTH=172 | 201606	18589	7.68	233.87	6	4	1.43	37.8
AT5G02610.1	| Ribosomal L29 family protein | Chr5:587611-588547 FORWARD LENGTH=123 | 201606	14322	10.92	207.44	6	4	2.14	30.1
AT5G13490.1	| ADP/ATP carrier 2 | Chr5:4336034-4337379 FORWARD LENGTH=385 | 201606	41834	9.79	214.35	6	4	0.49	10.1
AT1G07770.1	| ribosomal protein S15A | Chr1:2408413-2409065 REVERSE LENGTH=130 | 201606	14852	9.9	222.38	5	5	4.22	40
AT1G20950.1	| Phosphofructokinase family protein | Chr1:7297467-7301336 REVERSE LENGTH=614 | 201606	67875	6.53	270.18	5	5	0.45	10.3
AT1G29150.1	| non-ATPase subunit 9 | Chr1:10181240-10182499 FORWARD LENGTH=419 | 201606	47005	6.24	359.19	5	5	0.7	17.2
AT1G36160.1	| acetyl-CoA carboxylase 1 | Chr1:13534196-13543773 FORWARD LENGTH=2254 | 201606	252819	6.09	268.34	5	5	0.16	4.7
AT1G48630.1	| receptor for activated C kinase 1B | Chr1:17981977-17983268 REVERSE LENGTH=326 | 201606	36234	6.66	248.63	5	5	2.16	30.1
AT1G50480.1	| 10-formyltetrahydrofolate synthetase | Chr1:18702064-18704687 FORWARD LENGTH=634 | 201606	68329	6.26	246.36	5	5	0.44	12.1
AT1G61580.1	| R-protein L3 B | Chr1:22720833-22722402 REVERSE LENGTH=390 | 201606	44974	10.13	239.58	5	5	0.74	14.1
AT1G64520.1	| regulatory particle non-ATPase 12A | Chr1:23956459-23958120 FORWARD LENGTH=267 | 201606	30915	4.81	255.13	5	5	1.23	24.3
AT1G66200.1	| hypothetical protein | Chr1:24655520-24657520 REVERSE LENGTH=356 | 201606	39297	5.14	296.44	5	5	0.89	19.9
AT1G69830.1	| alpha-amylase-like 3 | Chr1:26288518-26293003 REVERSE LENGTH=887 | 201606	100293	5.73	321.69	5	5	0.34	9.1
AT1G75990.1	| PAM domain (PCI/PINT associated module) protein | Chr1:28524623-28526718 REVERSE LENGTH=487 | 201606	55899	8.52	319.93	5	5	0.96	19.5
AT1G79990.1	| coatomer subunit beta-2 | Chr1:30085910-30091949 FORWARD LENGTH=920 | 201606	104816	4.87	276.14	5	5	0.32	8.5
AT1G80410.1	| tetratricopeptide repeat (TPR)-containing protein | Chr1:30227963-30234832 REVERSE LENGTH=897 | 201606	102824	7.59	369.33	5	5	0.5	12.3
AT2G30110.1	| ubiquitin-activating enzyme 1 | Chr2:12852632-12857369 REVERSE LENGTH=1080 | 201606	121202	5.11	210.47	5	5	0.32	7.4
AT2G34480.1	| Ribosomal protein L18ae/LX family protein | Chr2:14532916-14534161 REVERSE LENGTH=178 | 201606	21407	10.49	184.22	5	5	2.85	30.9
AT2G39460.1	| ribosomal protein L23AA | Chr2:16475049-16475904 FORWARD LENGTH=154 | 201606	17430	10.2	307.39	5	5	2.25	29.2
AT2G40660.1	| Nucleic acid-binding%2C OB-fold-like protein | Chr2:16966011-16968866 FORWARD LENGTH=389 | 201606	42290	6.98	232.87	5	5	0.64	15.7
AT2G41530.1	| S-formylglutathione hydrolase | Chr2:17323656-17325430 REVERSE LENGTH=284 | 201606	31921	5.91	346.66	5	5	0.91	20.8
AT2G45300.1	| RNA 3~-terminal phosphate cyclase/enolpyruvate transferase%2C alpha/beta | Chr2:18677518-18679868 FORWARD LENGTH=520 | 201606	56269	6.3	288.89	5	5	0.45	10.2
AT2G46520.1	| cellular apoptosis susceptibility protein%2C putative / importin-alpha re-exporter | Chr2:19096867-19099785 FORWARD LENGTH=972 | 201606	109501	5.43	268.29	5	5	0.31	7.5
AT3G02260.1	| auxin transport protein (BIG) | Chr3:431152-448489 REVERSE LENGTH=5098 | 201606	574541	5.65	281.62	5	5	0.07	2.4
AT3G04920.1	| Ribosomal protein S24e family protein | Chr3:1360989-1362065 FORWARD LENGTH=133 | 201606	15363	10.7	266.14	5	5	3.98	30.8
AT3G07770.1	| HEAT SHOCK PROTEIN 89.1 | Chr3:2479611-2483970 FORWARD LENGTH=799 | 201606	90739	5.26	365.88	5	5	0.32	8.6
AT3G09200.1	| Ribosomal protein L10 family protein | Chr3:2823364-2825020 REVERSE LENGTH=320 | 201606	34169	5	300.28	5	5	0.84	22.8
AT3G11630.1	| Thioredoxin superfamily protein | Chr3:3672189-3673937 FORWARD LENGTH=266 | 201606	29188	6.92	323.09	5	5	1.03	24.8
AT3G13300.1	| Transducin/WD40 repeat-like superfamily protein | Chr3:4304085-4309949 FORWARD LENGTH=1344 | 201606	146599	5.73	304.52	5	5	0.26	7.4
AT3G14990.1	| Class I glutamine amidotransferase-like superfamily protein | Chr3:5047510-5049621 FORWARD LENGTH=392 | 201606	42230	5.31	373.9	5	5	0.48	13.3
AT3G19450.1	| GroES-like zinc-binding alcohol dehydrogenase family protein | Chr3:6744859-6747005 FORWARD LENGTH=365 | 201606	39700	5.33	330.46	5	5	0.87	19.2
AT3G27830.1	| ribosomal protein L12-A | Chr3:10318576-10319151 FORWARD LENGTH=191 | 201606	20063	5.51	316.74	5	5	3.21	31.4
AT3G44890.1	| ribosomal protein L9 | Chr3:16386505-16387963 FORWARD LENGTH=197 | 201606	22177	9.68	299.32	5	5	1.54	26.4
AT3G54470.1	| uridine 5~-monophosphate synthase / UMP synthase (PYRE-F) (UMPS) | Chr3:20168285-20170245 REVERSE LENGTH=476 | 201606	52159	6.77	263.81	5	5	0.75	13.9
AT3G57290.1	| eukaryotic translation initiation factor 3E | Chr3:21196786-21199073 REVERSE LENGTH=441 | 201606	52003	5.59	239.41	5	5	0.9	17.7
AT3G58570.1	| P-loop containing nucleoside triphosphate hydrolases superfamily protein | Chr3:21657099-21660352 FORWARD LENGTH=646 | 201606	69484	7.67	308.12	5	5	0.43	9.9
AT4G01310.1	| Ribosomal L5P family protein | Chr4:544166-545480 REVERSE LENGTH=262 | 201606	28440	10	337.99	5	5	1.4	24
AT4G02450.1	| HSP20-like chaperones superfamily protein | Chr4:1073987-1075765 REVERSE LENGTH=241 | 201606	25511	4.44	342.7	5	5	1.25	26.1
[truncated: 991 more rows]

## Sheet: Supplementary Data Set 1D
Supplementary Data Set 1. Proteins identified in an ABCE2:YFP co-immunoprecipitation assay
[truncated: 7,336 more rows]

[truncated: 2 more sheets: Supplementary Data Set 1E, Supplementary Data Set 1F]
