# Supplementary material for: The Arabidopsis ATP-Binding Cassette E protein ABCE2 is a conserved component of the translation machinery
Source: Front Plant Sci. 2022 Oct 17;13:1009895. doi: 10.3389/fpls.2022.1009895 (PMC9618717; doi:10.3389/fpls.2022.1009895)
Supplement: Supplementary file 3 [file DataSheet_3.xlsx]

## Sheet: Supplemental Data Set 3A
Supplemental Data Set 3. Genes deregulated in an RNA-seq analysis of api7-1 plants and gene ontology term enrichment analysis
Supplemental Data Set 3A. Genes deregulated in an RNA-seq analysis of api7-1 plants
Log2(Fold Change)	Adjusted p-value	Gene	Description
-8.43629	2.06486e-34	AT3G20260	DUF1666 family protein (DUF1666) [Source:UniProtKB/TrEMBL;Acc:Q8L795]
-8.2384	8.46051e-83	AT3G60470	Transmembrane protein, putative (DUF247) [Source:UniProtKB/TrEMBL;Acc:Q9M212]
-7.71596	9.41639e-23	AT3G12230	Serine carboxypeptidase-like 14 [Source:UniProtKB/Swiss-Prot;Acc:Q9C7D3]
-6.6147	3.07961e-11	AT4G05540	P-loop containing nucleoside triphosphate hydrolases superfamily protein [Source:UniProtKB/TrEMBL;Acc:F4JGH5]
-6.3777	1.62759e-30	AT1G66960	Terpenoid cyclases family protein [Source:TAIR;Acc:AT1G66960]
-6.3327	1.44526e-16	AT1G33730	Cytochrome P450, family 76, subfamily C, polypeptide 5 [Source:UniProtKB/TrEMBL;Acc:F4HRA1]
-6.16992	5.62556e-16	AT3G60420	Phosphoglycerate mutase family protein [Source:UniProtKB/TrEMBL;Acc:F4JBT8]
-6.1274	7.61879e-18	AT5G24540	Beta-glucosidase 31 [Source:UniProtKB/Swiss-Prot;Acc:Q9FLU9]
-6.11549	1.01285e-294	AT3G22910	Putative calcium-transporting ATPase 13, plasma membrane-type [Source:UniProtKB/Swiss-Prot;Acc:Q9LIK7]
-6.07146	5.66016e-42	AT1G74140	Rhomboid-like protein 17, chloroplastic [Source:UniProtKB/Swiss-Prot;Acc:B3H707]
-6.02806	1.35295e-11	AT3G53150	UDP-glucosyl transferase 73D1 [Source:TAIR;Acc:AT3G53150]
-5.93074	1.58028e-32	AT1G50760	Aminotransferase-like, plant mobile domain family protein [Source:UniProtKB/TrEMBL;Acc:Q9C6K2]
-5.92668	2.43312e-79	AT5G57550	Probable xyloglucan endotransglucosylase/hydrolase protein 25 [Source:UniProtKB/Swiss-Prot;Acc:Q38907]
-5.90836	1.04641e-18	AT5G22380	NAC-domain protein-like [Source:UniProtKB/TrEMBL;Acc:Q680R1]
-5.88619	1.21652e-10	AT3G47050	Beta-D-glucan exohydrolase-like protein [Source:UniProtKB/TrEMBL;Acc:Q9SD68]
-5.83289	1.38291e-15	XLOC_029519	-
-5.76044	1.01818e-55	AT1G08173	-
-5.68182	3.77629e-19	AT1G17615	Disease resistance protein (TIR-NBS class) [Source:UniProtKB/TrEMBL;Acc:Q4PT31]
-5.61312	2.12512e-29	AT3G46090	ZAT7 [Source:UniProtKB/TrEMBL;Acc:A0A178VI57]
-5.58496	1.59914e-09	AT4G39610	At4g39610 [Source:UniProtKB/TrEMBL;Acc:Q9SV97]
-5.57575	7.50653e-109	AT1G33960	P-loop containing nucleoside triphosphate hydrolases superfamily protein [Source:TAIR;Acc:AT1G33960]
-5.56478	4.8774e-07	AT5G66890	Probable disease resistance protein At5g66890 [Source:UniProtKB/Swiss-Prot;Acc:Q9FKZ2]
-5.45925	3.39001e-28	AT1G22990	HIPP22 [Source:UniProtKB/TrEMBL;Acc:A0A178WF89]
-5.33907	5.29245e-105	AT1G65360	Agamous-like MADS-box protein AGL23 [Source:UniProtKB/Swiss-Prot;Acc:O80807]
-5.32792	4.36185e-12	AT5G09876	unknown protein; FUNCTIONS IN: molecular_function unknown; INVOLVED IN: biological_process unknown; LOCATED IN: cellular_component unknown; Has 5 Blast hits to 5 proteins in 2 species: Archae - 0; Bacteria - 0; Metazoa - 0; Fungi - 0; Plants - 5; Vi /.../- 0; Other Eukaryotes - 0 (source: NCBI BLink). [Source:TAIR;Acc:AT5G09876]
-5.28231	1.04333e-22	AT5G22540	At5g22540 [Source:UniProtKB/TrEMBL;Acc:Q9FK85]
-5.28203	1.49314e-19	AT5G07780	Formin-like protein 19 [Source:UniProtKB/Swiss-Prot;Acc:Q9FF14]
-5.27812	2.24552e-24	AT3G28510	AAA-ATPase At3g28510 [Source:UniProtKB/Swiss-Prot;Acc:Q9LH84]
-5.27089	1.20008e-11	AT4G09770	TRAF-like family protein [Source:TAIR;Acc:AT4G09770]
-5.25058	1.60753e-168	AT4G14390	Ankyrin repeat family protein [Source:UniProtKB/TrEMBL;Acc:F4JVF4]
-5.24793	6.83635e-27	AT1G05880	Probable E3 ubiquitin-protein ligase ARI12 [Source:UniProtKB/Swiss-Prot;Acc:Q84RQ9]
-5.24792	1.66272e-06	AT2G05330	Putative BTB/POZ domain-containing protein At2g05330 [Source:UniProtKB/Swiss-Prot;Acc:Q9SJ29]
-5.23526	2.30882e-294	AT3G15536	Unknown gene [Source:TAIR;Acc:AT3G15536]
-5.22041	4.38284e-59	AT2G21900	At2g21900 [Source:UniProtKB/TrEMBL;Acc:Q1LYW5]
-5.21594	4.94344e-22	AT1G71390	receptor like protein 11 [Source:TAIR;Acc:AT1G71390]
-5.2149	1.1638e-122	AT1G33950	Immune-associated nucleotide-binding protein 7 [Source:UniProtKB/Swiss-Prot;Acc:Q9C8V2]
-5.19878	7.93908e-20	XLOC_028885	-
-5.18322	2.84104e-06	AT4G21950	unknown protein; Has 2 Blast hits to 2 proteins in 1 species: Archae - 0; Bacteria - 0; Metazoa - 0; Fungi - 0; Plants - 2; Viruses - 0; Other Eukaryotes - 0 (source: NCBI BLink). [Source:TAIR;Acc:AT4G21950]
-5.16992	3.12898e-06	AT5G11940	Subtilisin-like protease SBT3.11 [Source:UniProtKB/Swiss-Prot;Acc:Q1PDX5]
-5.16628	1.33135e-34	AT3G13433	Transmembrane protein [Source:UniProtKB/TrEMBL;Acc:F4JDB5]
-5.11894	2.5381e-14	AT5G45180	Putative flavin-containing monooxygenase 2 [Source:UniProtKB/Swiss-Prot;Acc:Q9FKE7]
-5.10952	1.57067e-35	AT1G13550	Putative uncharacterized protein [Source:UniProtKB/TrEMBL;Acc:Q3EDD3]
-5.10852	1.05462e-07	AT3G13850	LOB domain-containing protein 22 [Source:UniProtKB/Swiss-Prot;Acc:Q9LRW1]
-5.10455	1.47734e-85	AT5G51465	-
-5.08026	9.07048e-231	AT4G23310	Putative cysteine-rich receptor-like protein kinase 23 [Source:UniProtKB/Swiss-Prot;Acc:O65482]
-5.07076	2.89599e-21	AT3G12220	Serine carboxypeptidase-like 16 [Source:UniProtKB/Swiss-Prot;Acc:Q9C7D4]
-5.04847	8.99523e-262	AT3G57240	Probable glucan endo-1,3-beta-glucosidase BG3 [Source:UniProtKB/Swiss-Prot;Acc:F4J270]
-5.03342	1.38585e-27	AT1G58300	Heme oxygenase 4, chloroplastic [Source:UniProtKB/Swiss-Prot;Acc:Q9LQC0]
-5.03336	0	AT3G57260	Beta-1,3-glucanase 2 [Source:UniProtKB/TrEMBL;Acc:A0A1I9LMG6]
-5.02252	7.94551e-55	AT5G24200	alpha/beta-Hydrolases superfamily protein [Source:TAIR;Acc:AT5G24200]
-5.01722	4.08776e-75	AT4G10500	Protein DMR6-LIKE OXYGENASE 1 [Source:UniProtKB/Swiss-Prot;Acc:Q9ZSA8]
-5.00513	0	AT3G60415	At3g60420 [Source:UniProtKB/TrEMBL;Acc:Q9M217]
-4.99782	2.41731e-160	AT2G04495	At2g04495 [Source:UniProtKB/TrEMBL;Acc:Q6NLT2]
-4.99661	1.6182e-57	AT1G57630	Disease resistance protein RPP1-WsB, putative [Source:UniProtKB/TrEMBL;Acc:Q9FVT9]
-4.97022	3.96293e-47	AT3G50480	RPW8-like protein 4 [Source:UniProtKB/Swiss-Prot;Acc:Q9SCS6]
-4.96285	0	AT4G11890	Protein kinase superfamily protein [Source:UniProtKB/TrEMBL;Acc:F4JPT7]
-4.93242	2.14164e-35	AT4G11655	CASP-like protein [Source:UniProtKB/TrEMBL;Acc:A0A178USV5]
-4.92855	1.92428e-49	AT2G14610	Pathogenesis-related protein 1 [Source:UniProtKB/Swiss-Prot;Acc:P33154]
-4.92679	1.04207e-34	AT3G62210	Putative endonuclease or glycosyl hydrolase [Source:UniProtKB/TrEMBL;Acc:Q9M1Q3]
-4.922	0	AT2G32680	Receptor like protein 23 [Source:UniProtKB/Swiss-Prot;Acc:O48849]
-4.91936	2.22715e-52	AT2G04450	Nudix hydrolase 6 [Source:UniProtKB/Swiss-Prot;Acc:Q9SJC4]
-4.91886	1.72367e-06	XLOC_006205	Ras-related protein RABA2d
-4.87447	2.37416e-09	XLOC_015258	-
-4.86647	2.20667e-115	AT1G65483	Putative uncharacterized protein [Source:UniProtKB/TrEMBL;Acc:Q1G3X9]
-4.8562	3.20769e-32	AT3G49340	Cysteine protease-like protein [Source:UniProtKB/TrEMBL;Acc:Q9SG15]
-4.85487	3.40064e-62	AT1G07683	-
-4.84409	2.67136e-42	AT5G09290	3'(2'),5'-bisphosphate nucleotidase-like protein [Source:UniProtKB/TrEMBL;Acc:Q0WTK9]
-4.84254	3.23104e-12	AT3G61190	BON1-associated protein 1 [Source:UniProtKB/Swiss-Prot;Acc:Q941L2]
-4.8413	5.30499e-09	AT3G09280	F3L24.15 protein [Source:UniProtKB/TrEMBL;Acc:Q9SR35]
-4.82814	6.98266e-36	AT4G09780	TRAF-like family protein [Source:UniProtKB/TrEMBL;Acc:F4JKT0]
-4.82443	2.44357e-17	AT3G60970	Putative ABC transporter C family member 15 [Source:UniProtKB/Swiss-Prot;Acc:Q7FB56]
-4.80252	4.05053e-40	AT1G13540	At1g13540 [Source:UniProtKB/TrEMBL;Acc:Q6NM24]
-4.78507	3.85105e-11	XLOC_015303	UPF0496 protein At3g48650
-4.76174	7.54039e-250	AT5G52760	Heavy metal-associated isoprenylated plant protein 14 [Source:UniProtKB/Swiss-Prot;Acc:Q9LTE1]
-4.75579	3.32192e-53	AT4G00700	C2 calcium/lipid-binding plant phosphoribosyltransferase family protein [Source:UniProtKB/TrEMBL;Acc:Q8RXU9]
-4.72957	5.51281e-146	AT3G57460	Catalytic/ metal ion binding / metalloendopeptidase/ zinc ion binding protein [Source:UniProtKB/TrEMBL;Acc:F4J3D6]
-4.72362	5.16289e-51	AT2G45760	BON1-associated protein 2 [Source:UniProtKB/Swiss-Prot;Acc:Q58FX0]
-4.67027	2.94968e-134	AT4G04540	Putative cysteine-rich receptor-like protein kinase 39 [Source:UniProtKB/Swiss-Prot;Acc:Q9SYS7]
-4.65498	1.1884e-162	AT5G39670	Probable calcium-binding protein CML46 [Source:UniProtKB/Swiss-Prot;Acc:Q93Z27]
-4.61471	1.66378e-10	AT3G04220	Disease resistance protein (TIR-NBS-LRR class) family [Source:UniProtKB/TrEMBL;Acc:Q9M8X8]
-4.6102	3.25728e-18	AT1G57650	ATP binding protein [Source:UniProtKB/TrEMBL;Acc:F4I847]
-4.60927	1.34594e-156	AT4G21840	MSRB8 [Source:UniProtKB/TrEMBL;Acc:A0A178V0W9]
-4.60883	2.13489e-65	AT2G18660	EG45-like domain containing protein 2 [Source:UniProtKB/Swiss-Prot;Acc:Q9ZV52]
-4.59352	2.7645e-17	AT2G15780	At2g15780/F19G14.22 [Source:UniProtKB/TrEMBL;Acc:Q9XIL1]
-4.56985	1.11159e-05	XLOC_005715	Probable LRR receptor-like serine/threonine-protein kinase At1g29720
-4.56099	3.56308e-59	AT2G24850	Probable aminotransferase TAT3 [Source:UniProtKB/Swiss-Prot;Acc:Q9SK47]
-4.56071	3.3029e-06	AT1G07287	-
-4.55043	9.34526e-08	AT4G30640	Putative F-box/LRR-repeat protein 19 [Source:UniProtKB/Swiss-Prot;Acc:Q9M096]
-4.54579	2.77923e-55	AT2G29110	Glutamate receptor [Source:UniProtKB/TrEMBL;Acc:A0A1P8B074]
-4.53798	1.28288e-42	AT1G02450	NIMIN1 [Source:UniProtKB/TrEMBL;Acc:A0A178WC43]
-4.53784	1.24212e-253	AT5G13320	Auxin-responsive GH3 family protein [Source:TAIR;Acc:AT5G13320]
-4.52038	6.30267e-61	AT4G13890	Serine hydroxymethyltransferase 5 [Source:UniProtKB/Swiss-Prot;Acc:Q9SVM4]
-4.5157	1.87889e-57	AT4G04500	Cysteine-rich receptor-like protein kinase 37 [Source:UniProtKB/Swiss-Prot;Acc:Q9XEC7]
-4.5088	0	AT5G10760	Aspartyl protease AED1 [Source:UniProtKB/Swiss-Prot;Acc:Q9LEW3]
-4.49052	4.0832e-46	AT1G13530	Protein of unknown function (DUF1262) [Source:TAIR;Acc:AT1G13530]
-4.49032	6.67626e-45	AT4G34380	At4g34380 [Source:UniProtKB/TrEMBL;Acc:Q9SZ03]
-4.48112	0.000278109	AT3G57270	Probable glucan endo-1,3-beta-glucosidase BG1 [Source:UniProtKB/Swiss-Prot;Acc:Q9M2M0]
-4.47804	1.40331e-08	AT1G24130	F3I6.5 protein [Source:UniProtKB/TrEMBL;Acc:O48679]
-4.47712	2.0846e-65	AT4G23140	cysteine-rich RLK (RECEPTOR-like protein kinase) 6 [Source:TAIR;Acc:AT4G23140]
-4.47547	1.54613e-62	AT5G44460	Probable calcium-binding protein CML43 [Source:UniProtKB/Swiss-Prot;Acc:Q9FI19]
-4.47403	2.07759e-38	AT1G01680	U-box domain-containing protein 54 [Source:UniProtKB/Swiss-Prot;Acc:Q9LQ92]
-4.45754	1.29274e-41	AT2G46400	Probable WRKY transcription factor 46 [Source:UniProtKB/Swiss-Prot;Acc:Q9SKD9]
-4.45578	2.02454e-49	AT5G22545	Uncharacterized protein At5g22545 [Source:UniProtKB/TrEMBL;Acc:Q8GWC9]
-4.42361	5.36884e-42	AT4G03450	Ankyrin repeat family protein [Source:UniProtKB/TrEMBL;Acc:Q9ZT73]
-4.39645	8.27586e-71	AT3G60540	Protein transport protein Sec61 subunit beta [Source:UniProtKB/TrEMBL;Acc:Q9M206]
-4.39621	2.76656e-274	AT4G23160	cysteine-rich RLK (RECEPTOR-like protein kinase) 8 [Source:TAIR;Acc:AT4G23160]
-4.39267	1.37664e-172	AT1G10340	Ankyrin repeat family protein [Source:UniProtKB/TrEMBL;Acc:Q9SY76]
-4.3908	1.54659e-203	AT1G73805	Protein SAR DEFICIENT 1 [Source:UniProtKB/Swiss-Prot;Acc:Q9C9T2]
-4.38937	7.08026e-110	AT3G44350	NAC domain containing protein 61 [Source:UniProtKB/TrEMBL;Acc:B3H506]
-4.38203	9.6868e-60	AT5G01900	WRKY62 [Source:UniProtKB/TrEMBL;Acc:A0A178U8T9]
-4.37977	2.73913e-134	AT2G32140	Transmembrane receptor [Source:UniProtKB/TrEMBL;Acc:F4ISS7]
-4.37775	5.8394e-81	AT1G09930	Oligopeptide transporter 2 [Source:UniProtKB/Swiss-Prot;Acc:O04514]
-4.35496	0	AT4G23150	Cysteine-rich receptor-like protein kinase 7 [Source:UniProtKB/Swiss-Prot;Acc:Q8L7G3]
-4.3339	1.20346e-12	AT2G26480	UDP-glycosyltransferase 76D1 [Source:UniProtKB/Swiss-Prot;Acc:O48715]
-4.31702	1.72424e-201	AT5G22570	Probable WRKY transcription factor 38 [Source:UniProtKB/Swiss-Prot;Acc:Q8GWF1]
-4.31272	2.28464e-45	AT1G44130	Eukaryotic aspartyl protease family protein [Source:UniProtKB/TrEMBL;Acc:Q9C6Y5]
-4.3098	7.69677e-31	AT5G26690	Heavy metal-associated isoprenylated plant protein 2 [Source:UniProtKB/Swiss-Prot;Acc:Q8GWS3]
-4.30742	7.86466e-06	AT2G03040	Emp24/gp25L/p24 family/GOLD family protein [Source:UniProtKB/TrEMBL;Acc:Q9SLM5]
-4.30378	7.83359e-05	AT3G53065	D-galactoside/L-rhamnose binding SUEL lectin protein [Source:UniProtKB/TrEMBL;Acc:B3H4Y0]
-4.2899	7.61832e-34	AT5G25260	Flotillin-like protein 2 [Source:UniProtKB/Swiss-Prot;Acc:Q4V3D6]
-4.28716	2.224e-56	AT3G50470	MLA10 [Source:UniProtKB/TrEMBL;Acc:A0A178VJG9]
-4.27603	4.65437e-225	AT5G52740	Heavy metal-associated isoprenylated plant protein 12 [Source:UniProtKB/Swiss-Prot;Acc:Q9LTE3]
-4.26887	1.08275e-17	AT5G22560	Emb [Source:UniProtKB/TrEMBL;Acc:Q9FK83]
-4.2688	2.15058e-30	AT3G46080	Zinc finger protein ZAT8 [Source:UniProtKB/Swiss-Prot;Acc:Q9LX85]
-4.25954	6.9495e-251	AT3G13100	ABC transporter C family member 7 [Source:UniProtKB/Swiss-Prot;Acc:Q9LK62]
-4.25553	5.90827e-109	AT5G52720	Copper transport protein family [Source:TAIR;Acc:AT5G52720]
-4.24387	9.96988e-48	AT1G72240	Uncharacterized protein T9N14.5 [Source:UniProtKB/TrEMBL;Acc:Q9C7T1]
-4.23812	6.03834e-75	AT5G52730	Heavy metal-associated isoprenylated plant protein 11 [Source:UniProtKB/Swiss-Prot;Acc:Q9LTE4]
-4.22881	0.000130137	AT4G19925	Toll-Interleukin-Resistance (TIR) domain family protein [Source:UniProtKB/TrEMBL;Acc:F4JU10]
-4.22578	1.46575e-80	AT5G07650	Actin-binding FH2 protein [Source:TAIR;Acc:AT5G07650]
-4.21917	3.14455e-08	AT3G07920	Translation initiation factor IF2/IF5 [Source:UniProtKB/TrEMBL;Acc:F4JFQ0]
-4.16406	1.35428e-31	AT1G01560	Mitogen-activated protein kinase 11 [Source:UniProtKB/Swiss-Prot;Acc:Q9LMM5]
-4.16099	6.56992e-08	AT1G21245	F16F4.7 protein [Source:UniProtKB/TrEMBL;Acc:Q9LMN9]
-4.1533	7.49073e-86	AT3G01080	WRKY DNA-binding protein 58 [Source:UniProtKB/TrEMBL;Acc:A0A1I9LLS8]
-4.15183	1.05156e-164	AT1G33720	Cytochrome P450, family 76, subfamily C, polypeptide 6 [Source:UniProtKB/TrEMBL;Acc:Q9LQ25]
-4.13919	1.33733e-06	AT1G72760	Protein kinase superfamily protein [Source:TAIR;Acc:AT1G72760]
-4.13711	1.14997e-126	AT3G21080	ABC transporter-like protein [Source:UniProtKB/TrEMBL;Acc:Q9LJC4]
-4.13629	9.51549e-96	AT1G04600	Myosin-7 [Source:UniProtKB/Swiss-Prot;Acc:F4I5Q6]
-4.12928	4.34901e-14	AT2G33070	nitrile specifier protein 2 [Source:TAIR;Acc:AT2G33070]
-4.12553	1.0991e-09	AT3G17400	Putative F-box protein At3g17400 [Source:UniProtKB/Swiss-Prot;Acc:Q9LUT1]
-4.11213	0	AT1G21240	Wall-associated receptor kinase 3 [Source:UniProtKB/Swiss-Prot;Acc:Q9LMN8]
-4.10019	4.67686e-55	AT1G26200	TRAM, LAG1 and CLN8 (TLC) lipid-sensing domain containing protein [Source:TAIR;Acc:AT1G26200]
-4.09953	1.45057e-06	AT1G17610	Disease resistance protein CHS1 [Source:UniProtKB/Swiss-Prot;Acc:F4I902]
-4.09842	9.44567e-34	AT1G30190	Cotton fiber protein [Source:UniProtKB/TrEMBL;Acc:Q9C6Z9]
-4.09711	7.04012e-175	AT5G64810	Probable WRKY transcription factor 51 [Source:UniProtKB/Swiss-Prot;Acc:Q93WU9]
-4.09311	4.12327e-12	AT3G45330	Putative L-type lectin-domain containing receptor kinase I.1 [Source:UniProtKB/Swiss-Prot;Acc:Q9M3E5]
-4.08746	0.00252984	AT2G27780	Transcription factor IIS family protein [Source:UniProtKB/TrEMBL;Acc:Q9ZUX9]
-4.06407	1.58105e-69	AT3G60966	RING/U-box superfamily protein [Source:UniProtKB/TrEMBL;Acc:Q1G3N1]
-4.06258	5.1514e-214	AT3G28580	AAA-ATPase At3g28580 [Source:UniProtKB/Swiss-Prot;Acc:Q9LJJ7]
-4.05889	0.00256291	AT5G46295	Transmembrane protein [Source:UniProtKB/TrEMBL;Acc:Q3E8F8]
-4.05311	7.90279e-05	AT1G05040	T7A14.9 [Source:UniProtKB/TrEMBL;Acc:Q9ZVN8]
-4.03813	4.13645e-13	AT1G02440	ADP-ribosylation factor D1A [Source:UniProtKB/TrEMBL;Acc:F4HXI5]
-4.03562	3.17804e-08	AT5G07165	Transmembrane protein [Source:UniProtKB/TrEMBL;Acc:A0A1P8BFS0]
-4.02553	6.29854e-06	XLOC_010649	Putative F-box protein PP2-B8
-4.02121	8.31668e-217	AT3G23120	Receptor-like protein 38 [Source:UniProtKB/Swiss-Prot;Acc:Q9LS79]
-4.01903	5.75184e-36	AT5G11210	Glutamate receptor 2.5 [Source:UniProtKB/Swiss-Prot;Acc:Q9LFN5]
-4.01781	8.74554e-237	AT5G60800	Heavy metal transport/detoxification superfamily protein [Source:UniProtKB/TrEMBL;Acc:F4K0H3]
-4.01778	1.79366e-180	AT1G75040	Pathogenesis-related protein 5 [Source:UniProtKB/Swiss-Prot;Acc:P28493]
-4.01654	2.13557e-98	AT2G26400	acireductone dioxygenase 3 [Source:TAIR;Acc:AT2G26400]
-4.00731	6.11427e-292	AT5G10380	E3 ubiquitin-protein ligase RING1 [Source:UniProtKB/Swiss-Prot;Acc:Q9LX93]
-4.0058	2.01321e-22	AT3G01175	Transmembrane protein [Source:UniProtKB/TrEMBL;Acc:F4J4Q8]
-3.99999	0.000592561	AT1G04645	S-protein homolog 5 [Source:UniProtKB/Swiss-Prot;Acc:O23020]
-3.99999	0.00282194	AT1G52810	2-oxoglutarate (2OG) and Fe(II)-dependent oxygenase superfamily protein [Source:UniProtKB/TrEMBL;Acc:Q9C937]
-3.99852	1.2846e-139	AT1G35230	Classical arabinogalactan protein 5 [Source:UniProtKB/Swiss-Prot;Acc:Q8LCE4]
-3.99037	1.94917e-33	AT4G31230	Kinase with adenine nucleotide alpha hydrolases-like domain-containing protein [Source:UniProtKB/TrEMBL;Acc:Q1PE30]
-3.97947	1.53769e-84	AT3G25020	Receptor-like protein 42 [Source:UniProtKB/Swiss-Prot;Acc:Q9LJS0]
-3.96551	2.41293e-144	AT3G57950	At3g57950 [Source:UniProtKB/TrEMBL;Acc:Q9M2Q3]
-3.96005	1.06276e-113	AT4G25070	Caldesmon-like protein [Source:UniProtKB/TrEMBL;Acc:A0MFT2]
-3.95987	3.78882e-29	AT4G39030	Protein DETOXIFICATION 47, chloroplastic [Source:UniProtKB/Swiss-Prot;Acc:Q945F0]
-3.95419	0.00105266	AT2G02340	Putative F-box protein PP2-B8 [Source:UniProtKB/Swiss-Prot;Acc:Q9ZVQ8]
-3.95251	1.35938e-44	AT1G69930	Glutathione S-transferase U11 [Source:UniProtKB/Swiss-Prot;Acc:Q9CAS6]
-3.94584	3.25303e-42	AT5G42380	Calcium-binding protein CML37 [Source:UniProtKB/Swiss-Prot;Acc:Q9FIH9]
-3.938	2.66695e-47	AT3G52430	Lipase-like PAD4 [Source:UniProtKB/Swiss-Prot;Acc:Q9S745]
-3.93546	3.37489e-24	AT3G55700	Glycosyltransferase (Fragment) [Source:UniProtKB/TrEMBL;Acc:W8Q6P0]
-3.9314	5.06394e-91	AT2G34940	VSR5 [Source:UniProtKB/TrEMBL;Acc:A0A178VYD0]
-3.92427	6.18835e-22	AT3G01830	Probable calcium-binding protein CML40 [Source:UniProtKB/Swiss-Prot;Acc:Q9SGI8]
-3.91539	7.72812e-210	AT5G26920	Calmodulin-binding protein 60 G [Source:UniProtKB/Swiss-Prot;Acc:F4K2R6]
-3.90688	0.00705851	AT2G32130	At2g32130 [Source:UniProtKB/TrEMBL;Acc:Q9SKY7]
-3.89029	4.28678e-86	AT5G42830	HXXXD-type acyl-transferase family protein [Source:UniProtKB/TrEMBL;Acc:Q9FMN6]
-3.88023	1.01341e-232	AT3G25010	Receptor like protein 41 [Source:UniProtKB/TrEMBL;Acc:A0A1I9LTP5]
-3.87872	8.62917e-71	AT3G61198	other RNA [Source:TAIR;Acc:AT3G61198]
-3.87446	0.00484608	AT4G08190	P-loop containing nucleoside triphosphate hydrolases superfamily protein [Source:UniProtKB/TrEMBL;Acc:Q9SUG1]
-3.87163	1.87592e-84	AT4G13820	Disease resistance like protein [Source:UniProtKB/TrEMBL;Acc:Q8RXQ6]
-3.87148	4.75597e-08	AT5G52770	Copper transport protein family [Source:UniProtKB/TrEMBL;Acc:Q9LTE0]
-3.85886	2.31469e-269	AT1G43910	AAA-ATPase At1g43910 [Source:UniProtKB/Swiss-Prot;Acc:Q9LP11]
-3.85082	1.54024e-109	AT4G39830	At4g39830 [Source:UniProtKB/TrEMBL;Acc:O65670]
-3.84599	1.64988e-32	AT5G07760	formin homology 2 domain-containing protein / FH2 domain-containing protein [Source:TAIR;Acc:AT5G07760]
-3.84206	7.43426e-93	AT3G25510	Disease resistance protein (TIR-NBS-LRR class) family protein [Source:UniProtKB/TrEMBL;Acc:F4J910]
-3.81876	2.64338e-09	AT3G61390	U-box domain-containing protein 36 [Source:UniProtKB/Swiss-Prot;Acc:Q8GZ84]
-3.81261	5.1732e-40	AT3G11010	Receptor-like protein 34 [Source:UniProtKB/Swiss-Prot;Acc:Q9SRL2]
-3.80735	0.00832355	AT2G02310	Putative F-box protein PP2-B6 [Source:UniProtKB/Swiss-Prot;Acc:Q9ZVR0]
-3.79701	7.78571e-12	AT1G60830	RNA-binding (RRM/RBD/RNP motifs) family protein [Source:UniProtKB/TrEMBL;Acc:Q9C6C1]
-3.78701	1.46457e-29	AT2G33080	-
-3.78659	0.00037841	XLOC_018738	-
-3.77897	7.9638e-32	AT3G48630	unknown protein; BEST Arabidopsis thaliana protein match is: unknown protein (TAIR:AT3G44150.1); Has 64 Blast hits to 64 proteins in 15 species: Archae - 0; Bacteria - 0; Metazoa - 0; Fungi - 0; Plants - 64; Viruses - 0; Other Eukaryotes - 0 (source /.../ BLink). [Source:TAIR;Acc:AT3G48630]
-3.76818	1.31328e-05	AT5G39720	At5g39720 [Source:UniProtKB/TrEMBL;Acc:A2RVP6]
-3.76573	1.87152e-23	AT3G28890	Receptor-like protein 43 [Source:UniProtKB/Swiss-Prot;Acc:Q9LJW7]
-3.75568	7.61549e-73	AT1G28480	Glutaredoxin-C9 [Source:UniProtKB/Swiss-Prot;Acc:Q9SGP6]
-3.73696	0.000323606	AT5G44990	Glutathione S-transferase family protein [Source:UniProtKB/TrEMBL;Acc:Q9FL98]
-3.73667	4.47156e-281	AT2G20142	Toll-Interleukin-Resistance (TIR) domain family protein [Source:UniProtKB/TrEMBL;Acc:F4IUF0]
-3.73626	6.56478e-147	AT4G14365	Putative E3 ubiquitin-protein ligase XBAT34 [Source:UniProtKB/Swiss-Prot;Acc:Q9FPH0]
-3.73358	1.17176e-194	AT1G09932	Phosphoglycerate mutase family protein [Source:UniProtKB/TrEMBL;Acc:Q8GWG7]
-3.73284	9.62265e-243	AT3G47480	Probable calcium-binding protein CML47 [Source:UniProtKB/Swiss-Prot;Acc:Q9SN89]
-3.7252	4.72862e-41	AT2G05995	other RNA [Source:TAIR;Acc:AT2G05995]
-3.72207	9.67251e-66	AT5G59680	Probable LRR receptor-like serine/threonine-protein kinase At5g59680 [Source:UniProtKB/Swiss-Prot;Acc:Q9FN93]
-3.71265	1.42439e-64	AT1G09080	Probable mediator of RNA polymerase II transcription subunit 37b [Source:UniProtKB/Swiss-Prot;Acc:Q8H1B3]
-3.70282	1.69657e-200	AT1G14880	Protein PLANT CADMIUM RESISTANCE 1 [Source:UniProtKB/Swiss-Prot;Acc:Q9LQU2]
-3.70043	0.0012998	AT3G11390	Cysteine/Histidine-rich C1 domain family protein [Source:UniProtKB/TrEMBL;Acc:Q9CAY5]
-3.68646	1.19051e-95	AT2G21850	Cysteine/Histidine-rich C1 domain family protein [Source:UniProtKB/TrEMBL;Acc:F4III1]
-3.67872	2.56875e-46	AT4G04490	Cysteine-rich receptor-like protein kinase 36 [Source:UniProtKB/Swiss-Prot;Acc:Q9XEC6]
-3.66797	7.06498e-192	AT3G48090	Protein EDS1 [Source:UniProtKB/Swiss-Prot;Acc:Q9SU72]
-3.66296	0.0108254	AT4G30880	Bifunctional inhibitor/lipid-transfer protein/seed storage 2S albumin superfamily protein [Source:UniProtKB/TrEMBL;Acc:F4JR37]
-3.65672	3.89453e-192	AT3G11080	Receptor-like protein 35 [Source:UniProtKB/Swiss-Prot;Acc:Q9SRL7]
-3.64454	1.55999e-123	AT5G27060	receptor like protein 53 [Source:TAIR;Acc:AT5G27060]
-3.63558	0.00068391	AT2G19210	Putative leucine-rich repeat receptor-like protein kinase At2g19210 [Source:UniProtKB/Swiss-Prot;Acc:O65924]
-3.63404	1.67703e-27	AT3G25882	NIMIN-2 [Source:UniProtKB/TrEMBL;Acc:A0A178VAB1]
-3.62205	6.98164e-56	AT1G47890	-
-3.61939	2.05215e-33	AT3G50930	Protein HYPER-SENSITIVITY-RELATED 4 [Source:UniProtKB/Swiss-Prot;Acc:Q8VZG2]
-3.6147	0.00759053	AT3G09870	F8A24.8 protein [Source:UniProtKB/TrEMBL;Acc:Q9SF89]
-3.6088	0.00199158	AT5G22530	Uncharacterized protein At5g22530 [Source:UniProtKB/TrEMBL;Acc:Q9FK86]
-3.59932	8.53568e-13	AT1G63950	Heavy metal transport/detoxification superfamily protein [Source:TAIR;Acc:AT1G63950]
-3.58745	1.06871e-188	AT2G31880	Leucine-rich repeat receptor-like serine/threonine/tyrosine-protein kinase SOBIR1 [Source:UniProtKB/Swiss-Prot;Acc:Q9SKB2]
-3.56478	1.51307e-11	AT1G14250	Probable apyrase 5 [Source:UniProtKB/Swiss-Prot;Acc:Q6NQA8]
-3.56322	3.23488e-11	AT5G45000	Disease resistance protein (TIR-NBS-LRR class) family [Source:UniProtKB/TrEMBL;Acc:Q56XU3]
-3.55784	3.27827e-65	AT4G23030	Protein DETOXIFICATION 49 [Source:UniProtKB/Swiss-Prot;Acc:O82752]
-3.55341	6.80402e-162	XLOC_009131	Receptor-like protein 30
-3.54898	1.05156e-164	AT5G44570	unknown protein; FUNCTIONS IN: molecular_function unknown; INVOLVED IN: biological_process unknown; LOCATED IN: endomembrane system; EXPRESSED IN: leaf whorl, hypocotyl, sepal, flower, leaf; EXPRESSED DURING: petal differentiation and expansion stag /.../08 eight leaves visible; Has 7 Blast hits to 7 proteins in 2 species: Archae - 0; Bacteria - 0; Metazoa - 0; Fungi - 0; Plants - 7; Viruses - 0;…
-3.54488	5.91859e-35	AT4G04510	cysteine-rich RLK (RECEPTOR-like protein kinase) 38 [Source:TAIR;Acc:AT4G04510]
-3.54431	0.0181536	AT1G52857	unknown protein; FUNCTIONS IN: molecular_function unknown; INVOLVED IN: biological_process unknown; LOCATED IN: cellular_component unknown; Has 2 Blast hits to 2 proteins in 1 species: Archae - 0; Bacteria - 0; Metazoa - 0; Fungi - 0; Plants - 2; Vi /.../- 0; Other Eukaryotes - 0 (source: NCBI BLink). [Source:TAIR;Acc:AT1G52857]
-3.53432	1.80081e-18	AT3G11000	DCD (Development and Cell Death) domain protein [Source:UniProtKB/TrEMBL;Acc:F4J517]
-3.53176	6.50773e-125	AT2G31865	poly(ADP-ribose) glycohydrolase 2 [Source:TAIR;Acc:AT2G31865]
-3.52791	5.68248e-23	AT3G48640	Transmembrane protein [Source:UniProtKB/TrEMBL;Acc:Q9SMN5]
-3.52667	5.2623e-127	AT4G31800	WRKY like transcription factor [Source:UniProtKB/TrEMBL;Acc:Q0WTZ3]
-3.52356	0.000757445	XLOC_008348	Putative AC transposase
-3.52284	1.46779e-104	AT2G43000	Transcription factor JUNGBRUNNEN 1 [Source:UniProtKB/Swiss-Prot;Acc:Q9SK55]
-3.51367	6.84281e-168	AT5G11920	Beta-fructofuranosidase, insoluble isoenzyme CWINV6 [Source:UniProtKB/Swiss-Prot;Acc:Q8W4S6]
-3.50802	2.19666e-137	AT1G30900	Vacuolar-sorting receptor 6 [Source:UniProtKB/Swiss-Prot;Acc:Q9FYH7]
-3.50249	0.027136	AT3G27910	Galactose oxidase/kelch repeat superfamily protein [Source:TAIR;Acc:AT3G27910]
-3.5016	2.09234e-50	AT1G53100	At1g53100 [Source:UniProtKB/TrEMBL;Acc:Q6DBE8]
-3.49432	1.27451e-77	AT4G35180	Lysine histidine transporter-like 7 [Source:UniProtKB/Swiss-Prot;Acc:Q84WE9]
-3.48208	2.82566e-100	AT1G08050	T6D22.13 [Source:UniProtKB/TrEMBL;Acc:Q9LN03]
-3.47105	7.57527e-164	AT1G35710	Probable leucine-rich repeat receptor-like protein kinase At1g35710 [Source:UniProtKB/Swiss-Prot;Acc:Q9LP24]
-3.47063	8.99089e-14	AT5G23160	Uncharacterized protein At5g23160 [Source:UniProtKB/Swiss-Prot;Acc:Q9FMY4]
-3.4706	2.6696e-09	AT1G19250	Probable flavin-containing monooxygenase 1 [Source:UniProtKB/Swiss-Prot;Acc:Q9LMA1]
-3.45943	0.00272819	XLOC_008347	-
-3.4502	8.25508e-145	AT1G13470	Protein of unknown function (DUF1262) [Source:TAIR;Acc:AT1G13470]
-3.44771	1.95667e-41	AT3G56400	Probable WRKY transcription factor 70 [Source:UniProtKB/Swiss-Prot;Acc:Q9LY00]
-3.43295	0.00278009	AT5G39130	Germin-like protein subfamily 1 member 16 [Source:UniProtKB/Swiss-Prot;Acc:Q9FIC8]
-3.4188	5.43562e-154	AT4G18253	Receptor Serine/Threonine kinase-like protein [Source:UniProtKB/TrEMBL;Acc:A0A1P8B6P8]
-3.41503	0.000201753	AT5G60285	pre-tRNA [Source:TAIR;Acc:AT5G60285]
-3.41284	1.90725e-80	AT3G17690	Putative cyclic nucleotide-gated ion channel 19 [Source:UniProtKB/Swiss-Prot;Acc:Q9LDR2]
-3.40957	4.42176e-40	AT1G24147	Transmembrane protein [Source:UniProtKB/TrEMBL;Acc:Q1G3U1]
-3.4011	9.47788e-43	AT1G66090	Disease resistance protein (TIR-NBS class) [Source:UniProtKB/TrEMBL;Acc:Q9C515]
-3.39829	1.7624e-109	AT5G60900	receptor-like protein kinase 1 [Source:TAIR;Acc:AT5G60900]
-3.39742	9.9108e-93	AT5G60950	COBRA-like protein 5 [Source:UniProtKB/Swiss-Prot;Acc:Q9FME5]
-3.3967	8.14422e-104	AT2G43570	CHI [Source:UniProtKB/TrEMBL;Acc:A0A178W3M3]
-3.39232	1.95248e-12	XLOC_017793	-
-3.38829	1.49256e-16	AT4G21850	MSRB9 [Source:UniProtKB/TrEMBL;Acc:A0A178V287]
-3.36923	0.000214091	AT5G20430	Putative MOB kinase activator-like 2B [Source:UniProtKB/Swiss-Prot;Acc:F4K494]
-3.36668	0.000289472	AT3G10930	Uncharacterized protein At3g10930 [Source:UniProtKB/TrEMBL;Acc:Q84TK4]
-3.35508	5.24284e-145	AT2G17040	NAC domain containing protein 36 [Source:UniProtKB/TrEMBL;Acc:F4IME8]
-3.34759	1.4719e-12	AT5G65500	U-box domain-containing protein kinase family protein [Source:TAIR;Acc:AT5G65500]
-3.33298	6.70453e-11	AT4G17660	Probable serine/threonine-protein kinase PBL20 [Source:UniProtKB/Swiss-Prot;Acc:F4JPX3]
-3.33234	5.69303e-29	AT5G03350	Lectin-like protein [Source:UniProtKB/Swiss-Prot;Acc:Q9LZF5]
-3.32747	2.09124e-11	AT3G01760	Lysine histidine transporter-like 4 [Source:UniProtKB/Swiss-Prot;Acc:Q9SS86]
-3.32704	1.63005e-45	AT1G13340	Regulator of Vps4 activity in the MVB pathway protein [Source:UniProtKB/TrEMBL;Acc:Q9FX63]
-3.32193	7.44199e-22	AT4G14450	Uncharacterized protein At4g14450, chloroplastic [Source:UniProtKB/Swiss-Prot;Acc:Q6NN02]
-3.32192	0.0323258	AT3G53600	At3g53600 [Source:UniProtKB/TrEMBL;Acc:Q9LFG0]
-3.32192	0.0358408	AT4G00140	Calcium-binding EF-hand family protein [Source:UniProtKB/TrEMBL;Acc:O81315]
-3.31802	4.3865e-30	AT1G51960	Calmodulin-binding family protein [Source:UniProtKB/TrEMBL;Acc:Q9ZU28]
-3.31279	2.18e-35	XLOC_026888	-
-3.30774	7.30175e-136	AT1G58225	At1g58225 [Source:UniProtKB/TrEMBL;Acc:Q8GW35]
-3.3058	0.000293586	AT2G03290	Transmembrane emp24 domain-containing protein p24delta8 [Source:UniProtKB/Swiss-Prot;Acc:O81045]
-3.30226	4.25395e-125	AT5G43910	PfkB-like carbohydrate kinase family protein [Source:UniProtKB/TrEMBL;Acc:F4K7C7]
-3.30012	1.58967e-153	AT3G24900	Receptor like protein 39 [Source:UniProtKB/TrEMBL;Acc:A0A1I9LR86]
-3.29551	8.28186e-74	AT3G48080	Protein EDS1B [Source:UniProtKB/Swiss-Prot;Acc:Q9SU71]
-3.29191	2.16883e-15	AT5G05300	Gb [Source:UniProtKB/TrEMBL;Acc:Q9FLC4]
-3.29176	0.000352597	AT5G16900	Probable LRR receptor-like serine/threonine-protein kinase At5g16900 [Source:UniProtKB/Swiss-Prot;Acc:C0LGT5]
-3.29155	1.27774e-08	AT1G04323	-
-3.28349	1.54958e-141	AT1G74710	ADC synthase superfamily protein [Source:TAIR;Acc:AT1G74710]
-3.27301	0.0489271	AT1G51330	Serine protease inhibitor (SERPIN) family protein [Source:UniProtKB/TrEMBL;Acc:F4I826]
-3.27177	1.65935e-148	AT5G24530	Protein DOWNY MILDEW RESISTANCE 6 [Source:UniProtKB/Swiss-Prot;Acc:Q9FLV0]
-3.26725	3.70083e-34	AT5G63225	At5g63230 [Source:UniProtKB/TrEMBL;Acc:Q8GX54]
-3.26568	1.92791e-12	AT2G48150	Probable glutathione peroxidase 4 [Source:UniProtKB/Swiss-Prot;Acc:Q8L910]
-3.25671	1.4712e-48	AT4G32870	At4g32870 [Source:UniProtKB/TrEMBL;Acc:Q9M073]
-3.25653	1.99782e-134	AT1G22400	UDP-glycosyltransferase 85A1 [Source:UniProtKB/Swiss-Prot;Acc:Q9SK82]
-3.24762	2.45895e-70	AT1G52315	Regulator of Vps4 activity in the MVB pathway protein [Source:UniProtKB/TrEMBL;Acc:F4ICV8]
-3.23522	9.00792e-11	AT5G26700	Probable germin-like protein subfamily 2 member 5 [Source:UniProtKB/Swiss-Prot;Acc:O65252]
-3.23368	6.82739e-103	AT5G26170	Probable WRKY transcription factor 50 [Source:UniProtKB/Swiss-Prot;Acc:Q8VWQ5]
-3.22855	5.47399e-11	AT3G50800	Uncharacterized protein At3g50800 [Source:UniProtKB/TrEMBL;Acc:Q9SVL8]
-3.21871	2.41245e-12	AT2G33020	Receptor like protein 24 [Source:UniProtKB/Swiss-Prot;Acc:O49329]
-3.21842	1.62977e-05	AT5G25910	Receptor-like protein 52 [Source:UniProtKB/Swiss-Prot;Acc:Q7FZR1]
-3.21255	5.96568e-28	AT4G14400	Protein ACCELERATED CELL DEATH 6 [Source:UniProtKB/Swiss-Prot;Acc:Q8LPS2]
-3.19993	4.70554e-141	AT2G41100	Calmodulin-like protein 12 [Source:UniProtKB/Swiss-Prot;Acc:P25071]
-3.19639	0.000200576	AT5G18661	unknown protein; Has 30201 Blast hits to 17322 proteins in 780 species: Archae - 12; Bacteria - 1396; Metazoa - 17338; Fungi - 3422; Plants - 5037; Viruses - 0; Other Eukaryotes - 2996 (source: NCBI BLink). [Source:TAIR;Acc:AT5G18661]
-3.18816	3.13814e-28	AT5G54190	NADPH-protochlorophyllide oxidoreductase [Source:UniProtKB/TrEMBL;Acc:A0A178UR02]
-3.18715	2.06663e-12	AT3G09960	Calcineurin-like metallo-phosphoesterase superfamily protein [Source:UniProtKB/TrEMBL;Acc:Q8LEC0]
-3.18567	1.24e-23	AT2G47130	Short-chain dehydrogenase reductase 3a [Source:UniProtKB/Swiss-Prot;Acc:O80713]
-3.18545	1.07732e-92	AT3G22400	Linoleate 9S-lipoxygenase 5 [Source:UniProtKB/Swiss-Prot;Acc:Q9LUW0]
-3.18293	3.70023e-05	AT1G07135	At1g07135 [Source:UniProtKB/TrEMBL;Acc:Q9LMK6]
-3.17614	1.3788e-121	AT3G50770	Probable calcium-binding protein CML41 [Source:UniProtKB/Swiss-Prot;Acc:Q8L3R2]
-3.16992	1.27019e-06	AT5G47850	Serine/threonine-protein kinase-like protein CCR4 [Source:UniProtKB/Swiss-Prot;Acc:Q9FIJ6]
-3.16992	3.49544e-05	AT4G39020	SH3 domain-containing protein [Source:UniProtKB/TrEMBL;Acc:Q9SVJ1]
-3.16992	0.00020601	AT5G64790	Beta-1,3-glucanase [Source:UniProtKB/TrEMBL;Acc:Q9LV98]
-3.16798	1.38061e-124	AT1G15790	unknown protein; BEST Arabidopsis thaliana protein match is: unknown protein (TAIR:AT1G15780.1); Has 170 Blast hits to 94 proteins in 14 species: Archae - 0; Bacteria - 0; Metazoa - 0; Fungi - 0; Plants - 170; Viruses - 0; Other Eukaryotes - 0 (sour /.../BI BLink). [Source:TAIR;Acc:AT1G15790]
-3.16264	4.04186e-85	AT5G40230	WAT1-related protein At5g40230 [Source:UniProtKB/Swiss-Prot;Acc:F4KHA8]
-3.1618	1.30435e-207	AT3G61280	Glycosyltransferase [Source:UniProtKB/TrEMBL;Acc:Q5Q0C1]
-3.14495	1.73942e-104	AT4G25110	Metacaspase-2 [Source:UniProtKB/Swiss-Prot;Acc:Q7XJE5]
-3.13944	4.38221e-44	AT5G01100	FRB1 [Source:UniProtKB/TrEMBL;Acc:A0A178U817]
-3.13759	3.34785e-129	AT4G12720	MutT/nudix family protein [Source:UniProtKB/TrEMBL;Acc:F4JRE7]
-3.1375	0.0111686	AT4G28460	PAMP-induced secreted peptide 1 [Source:UniProtKB/Swiss-Prot;Acc:Q1PE40]
-3.13676	1.87681e-12	AT5G56960	basic helix-loop-helix (bHLH) DNA-binding family protein [Source:TAIR;Acc:AT5G56960]
-3.13385	0.00607081	AT5G57510	Cotton fiber protein [Source:UniProtKB/TrEMBL;Acc:Q9FKM0]
-3.1333	4.13123e-48	AT4G14370	Disease resistance protein (TIR-NBS-LRR class) family [Source:TAIR;Acc:AT4G14370]
-3.13107	2.54006e-12	AT2G37440	Type I inositol polyphosphate 5-phosphatase 8 [Source:UniProtKB/Swiss-Prot;Acc:Q0WT19]
-3.12928	0.034915	AT2G20150	Uncharacterized protein At2g20150/T2G17.5 [Source:UniProtKB/TrEMBL;Acc:Q84X45]
-3.12553	0.000916652	AT2G37820	At2g37820 [Source:UniProtKB/TrEMBL;Acc:Q6NM27]
-3.12338	2.00745e-07	AT2G23830	Vesicle-associated protein 3-1 [Source:UniProtKB/Swiss-Prot;Acc:O82213]
-3.11547	3.06489e-05	AT3G21320	EARLY FLOWERING protein [Source:UniProtKB/TrEMBL;Acc:Q5Q0C8]
-3.11151	1.66606e-09	AT1G63960	Copper transport protein family [Source:TAIR;Acc:AT1G63960]
-3.10553	2.35436e-08	AT1G66600	Probable WRKY transcription factor 63 [Source:UniProtKB/Swiss-Prot;Acc:Q9C6H5]
-3.10433	3.41931e-05	AT1G30850	Root hair specific 4 [Source:UniProtKB/TrEMBL;Acc:Q9SY31]
-3.1006	7.89972e-47	AT5G66640	DA1-related protein 3 [Source:TAIR;Acc:AT5G66640]
-3.09771	3.6652e-12	AT2G04515	Transmembrane protein [Source:UniProtKB/TrEMBL;Acc:Q5S4Y8]
-3.09474	1.97768e-31	AT5G63020	Probable disease resistance protein At5g63020 [Source:UniProtKB/Swiss-Prot;Acc:Q8RXS5]
-3.08746	0.0314699	AT5G22555	unknown protein; Has 30201 Blast hits to 17322 proteins in 780 species: Archae - 12; Bacteria - 1396; Metazoa - 17338; Fungi - 3422; Plants - 5037; Viruses - 0; Other Eukaryotes - 2996 (source: NCBI BLink). [Source:TAIR;Acc:AT5G22555]
-3.08657	1.55245e-105	AT1G34420	F12K21.25 [Source:UniProtKB/TrEMBL;Acc:Q9LNK3]
-3.08331	1.00519e-105	AT3G51330	Eukaryotic aspartyl protease family protein [Source:UniProtKB/TrEMBL;Acc:Q84WU7]
-3.0831	1.08689e-54	AT4G38560	Phospholipase like protein [Source:UniProtKB/TrEMBL;Acc:Q0WV01]
-3.08287	8.09867e-90	AT2G40750	Probable WRKY transcription factor 54 [Source:UniProtKB/Swiss-Prot;Acc:Q93WU8]
-3.08092	2.26003e-16	AT1G30220	Probable inositol transporter 2 [Source:UniProtKB/Swiss-Prot;Acc:Q9C757]
-3.07574	1.73372e-27	AT1G66465	Transmembrane protein [Source:UniProtKB/TrEMBL;Acc:A0A1P8ASK0]
-3.07529	7.33326e-07	AT3G60961	P-loop containing nucleoside triphosphate hydrolases superfamily protein [Source:UniProtKB/TrEMBL;Acc:B3H4S0]
-3.06787	1.52785e-133	AT2G44290	Protein YLS3 [Source:UniProtKB/Swiss-Prot;Acc:O64864]
-3.06394	1.54542e-186	AT5G17760	AAA-ATPase At5g17760 [Source:UniProtKB/Swiss-Prot;Acc:Q9FN75]
-3.061	2.4306e-94	AT3G51440	Protein STRICTOSIDINE SYNTHASE-LIKE 6 [Source:UniProtKB/Swiss-Prot;Acc:Q9SD05]
-3.05889	0.00139842	AT3G09545	-
-3.0565	6.51516e-14	AT1G24140	Metalloendoproteinase 3-MMP [Source:UniProtKB/Swiss-Prot;Acc:Q5XF51]
-3.04836	2.9216e-12	AT3G45130	Terpene cyclase/mutase family member [Source:UniProtKB/TrEMBL;Acc:A0A1I9LTE4]
-3.04283	2.97432e-147	AT5G40720	C3H4 type zinc finger protein (DUF23) [Source:UniProtKB/TrEMBL;Acc:Q9FM26]
-3.02553	6.57313e-67	AT1G23840	At1g23840/F5O8_37 [Source:UniProtKB/TrEMBL;Acc:Q9ZUB1]
-3.0133	2.16364e-37	AT4G21120	CAT1 [Source:UniProtKB/TrEMBL;Acc:A0A178UYU0]
-3.01226	7.62389e-95	AT4G22305	Carboxylesterase SOBER1 [Source:UniProtKB/Swiss-Prot;Acc:Q84WK4]
-3	0.00608434	AT1G05035	-
-2.9936	8.87816e-80	AT1G34180	NAC domain containing protein 16 [Source:TAIR;Acc:AT1G34180]
-2.99072	1.71462e-10	AT1G01530	AGL28 [Source:UniProtKB/TrEMBL;Acc:A0A178WE04]
-2.9896	2.23753e-73	AT4G26120	Ankyrin repeat family protein / BTB/POZ domain-containing protein [Source:TAIR;Acc:AT4G26120]
-2.98745	2.43648e-10	AT1G35210	Uncharacterized protein T32G9.25 [Source:UniProtKB/TrEMBL;Acc:Q9C6F2]
-2.97546	7.29535e-62	AT5G38250	LEAF RUST 10 DISEASE-RESISTANCE LOCUS RECEPTOR-LIKE PROTEIN KINASE-like 2.3 [Source:UniProtKB/Swiss-Prot;Acc:F4KA51]
-2.97154	1.33834e-06	AT1G31885	Aquaporin NIP3-1 [Source:UniProtKB/Swiss-Prot;Acc:Q9C6T0]
-2.96572	3.11896e-105	AT1G21250	Wall-associated receptor kinase 1 [Source:UniProtKB/Swiss-Prot;Acc:Q39191]
-2.96153	6.29677e-22	AT2G25440	Receptor-like protein 20 [Source:UniProtKB/Swiss-Prot;Acc:Q9SKK5]
-2.96056	3.06866e-58	AT2G27660	Cysteine/Histidine-rich C1 domain family protein [Source:UniProtKB/TrEMBL;Acc:Q9ZUW8]
-2.95954	8.43286e-111	AT1G45145	Thioredoxin H5 [Source:UniProtKB/Swiss-Prot;Acc:Q39241]
-2.95238	1.48826e-34	AT1G51620	Protein kinase superfamily protein [Source:UniProtKB/TrEMBL;Acc:Q9C8H4]
-2.9465	9.02334e-94	AT5G54610	Ankyrin repeat-containing protein BDA1 [Source:UniProtKB/Swiss-Prot;Acc:Q8GYH5]
-2.94555	5.71501e-06	AT5G52710	Copper transport protein family [Source:UniProtKB/TrEMBL;Acc:Q9LTE6]
-2.94485	0.00483779	AT2G38690	unknown protein; Has 9 Blast hits to 7 proteins in 5 species: Archae - 0; Bacteria - 0; Metazoa - 4; Fungi - 2; Plants - 3; Viruses - 0; Other Eukaryotes - 0 (source: NCBI BLink). [Source:TAIR;Acc:AT2G38690]
-2.94084	2.21229e-11	AT1G10560	U-box domain-containing protein 18 [Source:UniProtKB/Swiss-Prot;Acc:Q9XIJ5]
-2.9386	4.04896e-05	AT1G58390	Probable disease resistance protein At1g58390 [Source:UniProtKB/Swiss-Prot;Acc:Q8W474]
-2.93411	0.000432668	AT4G15660	Monothiol glutaredoxin-S8 [Source:UniProtKB/Swiss-Prot;Acc:O23417]
-2.92207	1.11837e-47	AT5G08240	At5g08240 [Source:UniProtKB/TrEMBL;Acc:Q9LEY3]
-2.92137	1.43671e-51	AT3G62780	At3g62780 [Source:UniProtKB/TrEMBL;Acc:Q9LZI7]
-2.92003	5.49173e-20	AT1G57560	At1g57560 [Source:UniProtKB/TrEMBL;Acc:Q9C695]
-2.90847	1.49049e-136	AT2G33580	Protein LYK5 [Source:UniProtKB/Swiss-Prot;Acc:O22808]
-2.90138	1.60213e-29	AT2G27690	Cytochrome P450 94C1 [Source:UniProtKB/Swiss-Prot;Acc:Q9ZUX1]
-2.89843	3.44877e-22	AT2G39410	Alpha/beta-Hydrolases superfamily protein [Source:UniProtKB/TrEMBL;Acc:O80628]
-2.89616	0.00442585	AT4G18870	E2F/DP family winged-helix DNA-binding domain-containing protein [Source:UniProtKB/TrEMBL;Acc:O49402]
-2.89616	0.00609206	AT2G23270	At2g23270 [Source:UniProtKB/TrEMBL;Acc:O22181]
-2.89265	1.05826e-43	AT1G79450	ALA-interacting subunit 5 [Source:UniProtKB/Swiss-Prot;Acc:Q8L8W0]
-2.89239	9.06811e-09	AT1G13310	Endosomal targeting BRO1-like domain-containing protein [Source:UniProtKB/TrEMBL;Acc:Q9FX66]
-2.8856	1.06276e-33	AT1G07900	LBD1 [Source:UniProtKB/TrEMBL;Acc:A0A178WM56]
-2.88264	0.00771016	AT4G28140	Ethylene-responsive transcription factor ERF054 [Source:UniProtKB/Swiss-Prot;Acc:Q9M0J3]
-2.87964	7.56675e-35	AT3G07195	RPM1-interacting protein 4 (RIN4) family protein [Source:UniProtKB/TrEMBL;Acc:A0A1I9LSZ8]
-2.86458	5.43338e-121	AT1G01340	Probable cyclic nucleotide-gated ion channel 10 [Source:UniProtKB/Swiss-Prot;Acc:Q9LNJ0]
-2.85221	7.0406e-178	AT4G04570	Cysteine-rich receptor-like protein kinase 40 [Source:UniProtKB/Swiss-Prot;Acc:Q9SYS3]
-2.84986	1.44789e-07	AT5G03210	Arabidopsis thaliana genomic DNA, chromosome 5, P1 clone:MOK16 [Source:UniProtKB/TrEMBL;Acc:Q9FYM8]
-2.84869	5.65707e-08	AT3G29000	Probable calcium-binding protein CML45 [Source:UniProtKB/Swiss-Prot;Acc:Q9MBG5]
-2.84435	0.000153906	AT2G44400	Cysteine/Histidine-rich C1 domain family protein [Source:UniProtKB/TrEMBL;Acc:O64874]
-2.84397	4.88991e-57	AT4G23320	cysteine-rich RLK (RECEPTOR-like protein kinase) 24 [Source:TAIR;Acc:AT4G23320]
-2.8365	0.0150375	AT4G04975	-
-2.8345	1.76081e-60	AT5G49680	Protein KINKY POLLEN [Source:UniProtKB/Swiss-Prot;Acc:Q6IMT0]
-2.82443	0.00171379	XLOC_005714	Probable LRR receptor-like serine/threonine-protein kinase At1g29720
-2.81969	3.02282e-34	AT5G55460	At5g55460 [Source:UniProtKB/TrEMBL;Acc:Q8GWA4]
-2.8187	1.5321e-05	AT4G39670	ACD11 homolog protein [Source:UniProtKB/Swiss-Prot;Acc:Q8L7U7]
-2.81007	4.95215e-11	AT3G22235	Cysteine-rich TM module stress tolerance protein [Source:UniProtKB/TrEMBL;Acc:Q8W472]
-2.80816	4.53194e-08	AT4G08555	At4g08555 [Source:UniProtKB/TrEMBL;Acc:Q8GWL6]
-2.80735	2.59257e-15	AT5G57010	IQ domain-containing protein IQM5 [Source:UniProtKB/Swiss-Prot;Acc:Q058N0]
-2.80433	8.03365e-83	AT4G21380	Receptor-like serine/threonine-protein kinase SD1-8 [Source:UniProtKB/Swiss-Prot;Acc:O81905]
-2.79256	1.65095e-08	AT3G02840	ARM repeat superfamily protein [Source:UniProtKB/TrEMBL;Acc:Q9M8S5]
-2.7896	1.92376e-49	AT5G16170	At5g16170 [Source:UniProtKB/TrEMBL;Acc:Q4V3A2]
-2.78849	3.64333e-09	AT3G23240	Ethylene-responsive transcription factor 1B [Source:UniProtKB/Swiss-Prot;Acc:Q8LDC8]
-2.78659	0.00444596	AT3G24065	Plant self-incompatibility protein S1 family [Source:UniProtKB/TrEMBL;Acc:Q9LIQ1]
-2.78135	0.0259292	AT3G03670	Peroxidase 28 [Source:UniProtKB/Swiss-Prot;Acc:Q9SS67]
-2.7776	0.0193169	AT4G11070	Probable WRKY transcription factor 41 [Source:UniProtKB/Swiss-Prot;Acc:Q8H0Y8]
-2.77494	6.02449e-15	AT1G67865	At1g67862/At1g67862 [Source:UniProtKB/TrEMBL;Acc:Q941E9]
-2.77259	1.33948e-05	AT3G44326	F-box protein At3g44326 [Source:UniProtKB/Swiss-Prot;Acc:Q2V3R1]
-2.76755	9.77186e-06	AT3G49130	SWAP (Suppressor-of-White-APricot)/surp RNA-binding domain-containing protein [Source:UniProtKB/TrEMBL;Acc:Q9SMU9]
-2.76553	7.18007e-05	AT4G21926	unknown protein; FUNCTIONS IN: molecular_function unknown; INVOLVED IN: biological_process unknown; LOCATED IN: cellular_component unknown; Has 30201 Blast hits to 17322 proteins in 780 species: Archae - 12; Bacteria - 1396; Metazoa - 17338; Fungi - /.../ Plants - 5037; Viruses - 0; Other Eukaryotes - 2996 (source: NCBI BLink). [Source:TAIR;Acc:AT4G21926]
-2.76317	2.38865e-13	AT5G62770	At5g62770 [Source:UniProtKB/TrEMBL;Acc:Q9FM16]
-2.76177	2.72626e-149	AT1G08450	Calreticulin-3 [Source:UniProtKB/Swiss-Prot;Acc:O04153]
-2.75791	1.04922e-120	AT2G26190	IQ domain-containing protein IQM4 [Source:UniProtKB/Swiss-Prot;Acc:O64851]
-2.75708	9.35675e-09	AT3G11340	UDP-glycosyltransferase 76B1 [Source:UniProtKB/Swiss-Prot;Acc:Q9C768]
-2.75534	1.22978e-139	AT4G28390	ADP,ATP carrier protein 3, mitochondrial [Source:UniProtKB/Swiss-Prot;Acc:O49447]
-2.75301	3.78193e-11	AT1G72910	Similar to part of disease resistance protein [Source:UniProtKB/TrEMBL;Acc:Q9SSN5]
-2.74273	2.53863e-60	AT3G22160	VQ motif-containing protein 22 [Source:UniProtKB/Swiss-Prot;Acc:Q9LIE6]
-2.74211	5.13523e-09	AT4G18195	Probable purine permease 8 [Source:UniProtKB/Swiss-Prot;Acc:Q0WRB9]
-2.73908	0.000131007	AT3G47210	AT3g47210/F13I12_260 [Source:UniProtKB/TrEMBL;Acc:Q9SD52]
-2.73621	1.09791e-28	AT5G41160	purine permease 12 [Source:TAIR;Acc:AT5G41160]
-2.73556	1.40664e-95	AT5G25440	Protein kinase superfamily protein [Source:TAIR;Acc:AT5G25440]
-2.72805	3.50916e-136	AT1G69840	Hypersensitive-induced response protein 2 [Source:UniProtKB/Swiss-Prot;Acc:Q9CAR7]
-2.71297	6.43778e-12	AT1G03850	Glutaredoxin family protein [Source:TAIR;Acc:AT1G03850]
-2.71271	0.00827506	AT4G29570	Cytidine deaminase 8 [Source:UniProtKB/Swiss-Prot;Acc:Q9XEX4]
-2.71253	1.84477e-14	AT1G72900	Similar to part of disease resistance protein [Source:UniProtKB/TrEMBL;Acc:Q9SSN6]
-2.71233	4.5339e-75	AT3G51860	Cation exchanger 3 [Source:UniProtKB/TrEMBL;Acc:A0A1I9LSS9]
-2.70782	0.000745495	AT3G57100	UPF0496 protein At3g57100 [Source:UniProtKB/Swiss-Prot;Acc:Q9M1J0]
-2.69792	6.75478e-09	AT4G27280	Calcium-binding protein KRP1 [Source:UniProtKB/Swiss-Prot;Acc:O81831]
-2.69042	2.10987e-06	AT2G28400	Uncharacterized protein At2g28400 [Source:UniProtKB/TrEMBL;Acc:Q9SKN0]
-2.68819	2.58164e-58	AT1G51270	Vesicle-associated protein 1-4 [Source:UniProtKB/TrEMBL;Acc:F4I818]
-2.68164	4.52915e-19	AT5G60440	Agamous-like MADS-box protein AGL62 [Source:UniProtKB/Swiss-Prot;Acc:Q9FKK2]
-2.67826	0.00485109	AT2G40000	Nematode resistance protein-like HSPRO2 [Source:UniProtKB/Swiss-Prot;Acc:O04203]
-2.67634	4.93989e-87	AT3G26220	Cytochrome P450 71B3 [Source:UniProtKB/Swiss-Prot;Acc:O65785]
-2.66693	1.95907e-63	AT5G40780	Lysine histidine transporter 1 [Source:UniProtKB/Swiss-Prot;Acc:Q9FKS8]
-2.66436	4.66326e-69	AT5G52750	Heavy metal-associated isoprenylated plant protein 13 [Source:UniProtKB/Swiss-Prot;Acc:Q9LTE2]
-2.66296	2.03623e-20	AT1G58420	At1g58420 [Source:UniProtKB/TrEMBL;Acc:Q9C647]
-2.66204	1.13454e-13	AT3G12910	NAC (No Apical Meristem) domain transcriptional regulator superfamily protein [Source:UniProtKB/TrEMBL;Acc:Q9LSI4]
-2.65535	0.0102062	AT1G05220	Transmembrane protein 97, Putative [Source:UniProtKB/TrEMBL;Acc:O23046]
-2.65476	6.52508e-77	AT5G61250	GUS1 [Source:UniProtKB/TrEMBL;Acc:A0A178UBZ8]
-2.65306	6.73366e-146	AT1G66880	Protein kinase superfamily protein [Source:TAIR;Acc:AT1G66880]
-2.64981	0.000401971	AT1G15010	Mediator of RNA polymerase II transcription subunit [Source:UniProtKB/TrEMBL;Acc:Q8LCU9]
-2.64819	7.91353e-16	AT1G67000	LEAF RUST 10 DISEASE-RESISTANCE LOCUS RECEPTOR-LIKE PROTEIN KINASE-like 2.8 [Source:UniProtKB/Swiss-Prot;Acc:Q3ECH2]
-2.64385	0.00195308	AT3G04200	Germin-like protein subfamily 1 member 6 [Source:UniProtKB/Swiss-Prot;Acc:Q9M8X6]
-2.6368	1.83814e-12	AT2G14560	Protein of unknown function (DUF567) [Source:TAIR;Acc:AT2G14560]
-2.63001	1.76351e-65	AT3G11402	Cysteine/Histidine-rich C1 domain family protein [Source:UniProtKB/TrEMBL;Acc:Q3EB86]
-2.62586	6.61779e-62	AT4G20110	VACUOLAR SORTING RECEPTOR 7 [Source:UniProtKB/TrEMBL;Acc:F4JUS0]
-2.62108	7.91594e-25	AT1G73810	Core-2/I-branching beta-1,6-N-acetylglucosaminyltransferase family protein [Source:UniProtKB/TrEMBL;Acc:Q9C9T1]
-2.62015	5.86231e-06	AT3G47040	Glycosyl hydrolase family protein [Source:UniProtKB/TrEMBL;Acc:F4JAB7]
-2.61981	2.50059e-48	AT1G51890	Leucine-rich repeat protein kinase family protein [Source:TAIR;Acc:AT1G51890]
-2.61953	1.66449e-96	AT1G67970	Heat stress transcription factor A-8 [Source:UniProtKB/Swiss-Prot;Acc:Q9S7U5]
-2.6182	1.45633e-40	AT3G47380	Pectinesterase inhibitor 11 [Source:UniProtKB/Swiss-Prot;Acc:Q9STY5]
-2.61585	8.72314e-114	AT1G49050	Aspartyl protease APCB1 [Source:UniProtKB/Swiss-Prot;Acc:Q9M9A8]
-2.60535	2.64212e-89	AT1G65790	Receptor-like serine/threonine-protein kinase SD1-7 [Source:UniProtKB/Swiss-Prot;Acc:Q39086]
-2.60486	0.00732729	AT1G66170	PHD finger protein MALE MEIOCYTE DEATH 1 [Source:UniProtKB/Swiss-Prot;Acc:Q7X6Y7]
-2.59679	2.55833e-115	AT4G01010	Putative cyclic nucleotide-gated ion channel 13 [Source:UniProtKB/Swiss-Prot;Acc:Q9LD40]
-2.59494	0.000245294	AT3G02705	-
-2.59316	3.43042e-103	AT1G76040	calcium-dependent protein kinase 29 [Source:TAIR;Acc:AT1G76040]
-2.58496	4.52597e-12	AT5G19650	Transcription repressor OFP8 [Source:UniProtKB/Swiss-Prot;Acc:Q3E9B4]
-2.58496	0.00177712	AT5G14160	Putative F-box protein At5g14160 [Source:UniProtKB/Swiss-Prot;Acc:Q9FMT5]
-2.58496	0.0459441	AT3G56408	other RNA [Source:TAIR;Acc:AT3G56408]
-2.58462	2.44318e-62	AT3G56710	SIB1 [Source:UniProtKB/TrEMBL;Acc:A0A178VMX5]
-2.58062	1.42875e-14	AT5G44585	unknown protein; FUNCTIONS IN: molecular_function unknown; INVOLVED IN: biological_process unknown; LOCATED IN: endomembrane system; Has 30201 Blast hits to 17322 proteins in 780 species: Archae - 12; Bacteria - 1396; Metazoa - 17338; Fungi - 3422; /.../ - 5037; Viruses - 0; Other Eukaryotes - 2996 (source: NCBI BLink). [Source:TAIR;Acc:AT5G44585]
-2.5801	2.02524e-47	AT3G13950	AT3G13950 protein [Source:UniProtKB/TrEMBL;Acc:B9DG91]
-2.56688	3.74113e-99	AT1G56120	Leucine-rich repeat transmembrane protein kinase [Source:UniProtKB/TrEMBL;Acc:F4I3K0]
-2.56293	0.000704683	AT3G20180	Copper transport protein family [Source:UniProtKB/TrEMBL;Acc:A0A1I9LLM5]
-2.56143	8.5505e-28	AT5G05320	Monooxygenase 3 [Source:UniProtKB/Swiss-Prot;Acc:Q9FLC2]
-2.56071	0.0197302	AT4G02541	unknown protein; Has 30201 Blast hits to 17322 proteins in 780 species: Archae - 12; Bacteria - 1396; Metazoa - 17338; Fungi - 3422; Plants - 5037; Viruses - 0; Other Eukaryotes - 2996 (source: NCBI BLink). [Source:TAIR;Acc:AT4G02541]
-2.55952	5.55317e-28	AT2G44380	At2g44380 [Source:UniProtKB/TrEMBL;Acc:O64872]
-2.55778	2.42931e-19	AT5G05340	Peroxidase 52 [Source:UniProtKB/Swiss-Prot;Acc:Q9FLC0]
-2.54749	6.74117e-05	AT5G22550	Emb [Source:UniProtKB/TrEMBL;Acc:Q9FK84]
-2.54447	4.52231e-09	AT3G09940	Monodehydroascorbate reductase 3 [Source:UniProtKB/Swiss-Prot;Acc:Q9SR59]
-2.54432	8.79638e-23	AT1G80120	Protein LURP-one-related 5 [Source:UniProtKB/Swiss-Prot;Acc:Q9SSC7]
-2.54174	7.34007e-84	AT4G33050	calmodulin-binding family protein [Source:TAIR;Acc:AT4G33050]
-2.54157	4.86921e-07	AT3G46520	Actin-12 [Source:UniProtKB/Swiss-Prot;Acc:P53497]
-2.53785	2.92333e-50	AT1G74360	Probable LRR receptor-like serine/threonine-protein kinase At1g74360 [Source:UniProtKB/Swiss-Prot;Acc:C0LGJ1]
-2.5377	3.34997e-51	AT1G70690	PDLP5 [Source:UniProtKB/TrEMBL;Acc:A0A178WPB2]
-2.53735	1.10277e-36	AT4G17670	Senescence-associated family protein (DUF581) [Source:UniProtKB/TrEMBL;Acc:Q8VZM9]
-2.53489	1.99519e-32	AT3G54150	Embryonic abundant protein-like [Source:UniProtKB/TrEMBL;Acc:Q9M389]
-2.5308	1.38441e-60	AT4G21903	Protein DETOXIFICATION [Source:UniProtKB/TrEMBL;Acc:F4JKB8]
-2.52738	9.40545e-42	AT5G67340	U-box domain-containing protein 2 [Source:UniProtKB/Swiss-Prot;Acc:Q5XEZ8]
-2.52664	5.23385e-57	AT5G25250	Flotillin-like protein 1 [Source:UniProtKB/Swiss-Prot;Acc:Q501E6]
-2.52572	8.46012e-12	AT1G32960	Subtilisin-like protease SBT3.3 [Source:UniProtKB/Swiss-Prot;Acc:Q9MAP5]
-2.52132	2.22753e-71	AT1G18910	Zinc finger protein BRUTUS-like At1g18910 [Source:UniProtKB/Swiss-Prot;Acc:F4IDY5]
-2.52086	2.1463e-102	AT3G05650	Receptor-like protein 32 [Source:UniProtKB/Swiss-Prot;Acc:Q9M9X0]
-2.51965	1.03125e-43	AT3G18250	Putative membrane lipoprotein [Source:UniProtKB/TrEMBL;Acc:Q6E248]
-2.51531	1.62766e-28	AT1G56540	Disease resistance protein (TIR-NBS-LRR class) family [Source:UniProtKB/TrEMBL;Acc:Q9FXA6]
-2.51307	0.000144237	AT1G55775	Heavy metal-associated domain protein [Source:UniProtKB/TrEMBL;Acc:A0A1P8AT75]
-2.51163	5.26038e-49	AT3G09490	At3g09490 [Source:UniProtKB/TrEMBL;Acc:Q9SF54]
-2.5097	4.97976e-22	AT5G54490	PBP1 [Source:UniProtKB/TrEMBL;Acc:A0A178URF6]
-2.50914	1.22367e-68	AT2G02360	F-box protein PP2-B10 [Source:UniProtKB/Swiss-Prot;Acc:Q9ZVQ6]
-2.50792	5.82312e-47	AT1G78410	VQ motif-containing protein 10 [Source:UniProtKB/Swiss-Prot;Acc:Q8VYI5]
-2.50773	3.12021e-62	AT5G05460	Cytosolic endo-beta-N-acetylglucosaminidase 1 [Source:UniProtKB/Swiss-Prot;Acc:F4JZC2]
-2.50609	1.85386e-06	AT2G18690	Expressed protein [Source:UniProtKB/TrEMBL;Acc:Q9ZV49]
-2.4975	1.78415e-06	AT1G55230	Proteinase inhibitor I4, serpin (DUF716) [Source:UniProtKB/TrEMBL;Acc:Q9C893]
-2.49532	5.30184e-10	AT1G24145	At1g24145 [Source:UniProtKB/TrEMBL;Acc:Q8GYP2]
-2.49361	1.41362e-22	AT2G32030	Acyl-CoA N-acyltransferases (NAT) superfamily protein [Source:UniProtKB/TrEMBL;Acc:Q9SKZ6]
-2.49185	0.0419197	AT2G24285	BEST Arabidopsis thaliana protein match is: Zinc finger, C3HC4 type (RING finger) family protein (TAIR:AT2G24480.1); Has 26 Blast hits to 26 proteins in 2 species: Archae - 0; Bacteria - 0; Metazoa - 0; Fungi - 0; Plants - 26; Viruses - 0; Other Euk /.../s - 0 (source: NCBI BLink). [Source:TAIR;Acc:AT2G24285]
-2.48995	2.35858e-41	AT1G63720	At1g63720/F24D7_9 [Source:UniProtKB/TrEMBL;Acc:Q93W23]
-2.48828	0.00229131	AT1G51300	alpha/beta-Hydrolases superfamily protein [Source:TAIR;Acc:AT1G51300]
-2.48543	2.43709e-06	AT5G10660	Calmodulin-binding protein-like protein [Source:UniProtKB/TrEMBL;Acc:F4KI88]
-2.48468	1.59503e-80	AT3G28540	AAA-ATPase At3g28540 [Source:UniProtKB/Swiss-Prot;Acc:Q9LH82]
-2.48416	8.7342e-23	AT4G13810	-
-2.47969	1.58201e-18	AT3G57640	At3g57640 [Source:UniProtKB/TrEMBL;Acc:Q9SVX8]
-2.47705	1.3898e-68	AT1G56660	F25P12.91 protein [Source:UniProtKB/TrEMBL;Acc:Q9FXB5]
-2.47676	0.00128929	AT5G61600	Ethylene-responsive transcription factor ERF104 [Source:UniProtKB/Swiss-Prot;Acc:Q9FKG1]
-2.47393	0.0318709	AT1G68700	F24J5.7 [Source:UniProtKB/TrEMBL;Acc:Q9SX32]
-2.46696	1.92018e-73	AT2G40520	Nucleotidyltransferase family protein [Source:UniProtKB/TrEMBL;Acc:Q5BPR8]
-2.46168	7.78947e-75	AT3G23110	Receptor-like protein 37 [Source:UniProtKB/Swiss-Prot;Acc:Q9LS80]
-2.45372	0.00112807	AT4G14730	Protein LIFEGUARD 1 [Source:UniProtKB/Swiss-Prot;Acc:F4JIE8]
-2.45066	0.00556305	AT1G61480	G-type lectin S-receptor-like serine/threonine-protein kinase At1g61480 [Source:UniProtKB/Swiss-Prot;Acc:O64771]
-2.45017	1.46215e-10	AT1G30370	DLAH [Source:UniProtKB/TrEMBL;Acc:A0A178W2K8]
-2.44489	7.13436e-22	AT3G23010	-
-2.44413	6.99542e-47	AT1G02220	NAC domain-containing protein 3 [Source:UniProtKB/Swiss-Prot;Acc:Q5PP28]
-2.44392	2.88201e-08	AT4G10860	F8M12.2 protein [Source:UniProtKB/TrEMBL;Acc:O81627]
-2.43904	4.80226e-26	AT1G71890	Sucrose transport protein SUC5 [Source:UniProtKB/Swiss-Prot;Acc:Q9C8X2]
-2.43836	3.90248e-09	AT5G06320	NHL3 [Source:UniProtKB/TrEMBL;Acc:A0A178UB58]
-2.43769	5.4745e-27	AT2G18680	unknown protein; FUNCTIONS IN: molecular_function unknown; INVOLVED IN: biological_process unknown; LOCATED IN: endomembrane system; EXPRESSED IN: male gametophyte, pollen tube; EXPRESSED DURING: L mature pollen stage, M germinated pollen stage; BES /.../idopsis thaliana protein match is: unknown protein (TAIR:AT2G18690.1); Has 30201 Blast hits to 17322 proteins in 780 species: Archae - 12; Bacte…
-2.4374	0.0178023	AT5G08990	-
-2.4357	0.000197018	AT1G15630	Transmembrane protein [Source:UniProtKB/TrEMBL;Acc:Q5BQ07]
-2.43296	0.00302616	AT1G74080	Transcription factor MYB122 [Source:UniProtKB/Swiss-Prot;Acc:Q9C9C8]
-2.42741	4.01794e-72	AT1G07000	EXO70B2 [Source:UniProtKB/TrEMBL;Acc:A0A178WCB5]
-2.42626	0.0357304	AT2G08025	-
-2.42626	0.0404379	AT1G34480	Cysteine/Histidine-rich C1 domain family protein [Source:UniProtKB/TrEMBL;Acc:Q9LNK8]
-2.42058	1.18487e-10	AT1G59590	At1g59590 [Source:UniProtKB/TrEMBL;Acc:Q9SLT9]
-2.41656	5.6438e-09	AT5G55170	Small ubiquitin-related modifier 3 [Source:UniProtKB/Swiss-Prot;Acc:Q9FLP5]
-2.41553	3.30393e-62	AT4G35110	Phospholipase-like protein (PEARLI 4) family protein [Source:UniProtKB/TrEMBL;Acc:A8MQE1]
-2.41503	0.00508681	AT3G29970	B12D protein [Source:UniProtKB/TrEMBL;Acc:Q9LJ47]
-2.41391	1.56515e-73	AT4G23810	Probable WRKY transcription factor 53 [Source:UniProtKB/Swiss-Prot;Acc:Q9SUP6]
-2.41096	1.30809e-128	AT2G19130	G-type lectin S-receptor-like serine/threonine-protein kinase At2g19130 [Source:UniProtKB/Swiss-Prot;Acc:O64477]
-2.3975	1.61916e-14	AT4G25000	Alpha-amylase 1 [Source:UniProtKB/Swiss-Prot;Acc:Q8VZ56]
-2.39551	1.84553e-37	AT5G48657	defense protein-related [Source:TAIR;Acc:AT5G48657]
-2.39232	0.00248085	AT3G55910	ADP-ribosylation factor GTPase-activating protein [Source:UniProtKB/TrEMBL;Acc:Q9LY54]
-2.39046	1.79906e-90	AT2G29120	Glutamate receptor 2.7 [Source:UniProtKB/Swiss-Prot;Acc:Q8LGN0]
-2.38744	2.62022e-21	AT2G04070	Protein DETOXIFICATION 4 [Source:UniProtKB/Swiss-Prot;Acc:Q9SIA3]
-2.38428	1.10654e-14	AT3G22231	Cysteine-rich and transmembrane domain-containing protein PCC1 [Source:UniProtKB/Swiss-Prot;Acc:Q94C26]
-2.37813	6.33751e-89	AT1G11330	G-type lectin S-receptor-like serine/threonine-protein kinase At1g11330 [Source:UniProtKB/Swiss-Prot;Acc:Q9SXB8]
-2.37704	5.12473e-91	AT5G24210	Alpha/beta-Hydrolases superfamily protein [Source:UniProtKB/TrEMBL;Acc:Q9FNG1]
-2.36786	1.04466e-07	AT3G53232	At3g53232 [Source:UniProtKB/TrEMBL;Acc:Q8LBB5]
-2.36773	2.13186e-09	AT2G47190	ATMYB2 [Source:UniProtKB/TrEMBL;Acc:Q39028]
-2.36595	5.5371e-16	AT4G13560	Late embryogenesis abundant protein (LEA) family protein [Source:UniProtKB/TrEMBL;Acc:Q9T0H6]
-2.36264	7.208e-60	AT2G39210	At2g39210/T16B24.15 [Source:UniProtKB/TrEMBL;Acc:O80960]
-2.36257	0.003004	AT3G57465	Zinc-metallopeptidase, peroxisomal protein [Source:UniProtKB/TrEMBL;Acc:A0A1I9LR11]
-2.35989	0.00022247	AT5G03020	F-box/kelch-repeat protein At5g03020 [Source:UniProtKB/Swiss-Prot;Acc:Q9LYY3]
-2.35755	4.91132e-05	AT3G61660	unknown protein; BEST Arabidopsis thaliana protein match is: unknown protein (TAIR:AT2G46375.1); Has 28 Blast hits to 28 proteins in 7 species: Archae - 0; Bacteria - 0; Metazoa - 0; Fungi - 0; Plants - 28; Viruses - 0; Other Eukaryotes - 0 (source: /.../BLink). [Source:TAIR;Acc:AT3G61660]
-2.35559	1.15174e-30	AT1G80840	Probable WRKY transcription factor 40 [Source:UniProtKB/Swiss-Prot;Acc:Q9SAH7]
-2.35107	1.1782e-06	AT1G25460	NAD(P)-binding Rossmann-fold superfamily protein [Source:TAIR;Acc:AT1G25460]
-2.34852	3.1318e-06	XLOC_019768	-
-2.3484	1.09524e-07	AT5G18730	CONTAINS InterPro DOMAIN/s: Molecular chaperone, heat shock protein, Hsp40, DnaJ (InterPro:IPR015609); BEST Arabidopsis thaliana protein match is: Domain of unknown function (DUF3444) (TAIR:AT5G18740.1); Has 30201 Blast hits to 17322 proteins in 780 /.../es: Archae - 12; Bacteria - 1396; Metazoa - 17338; Fungi - 3422; Plants - 5037; Viruses - 0; Other Eukaryotes - 2996 (source: NCBI BLink). [Sour…
-2.34315	1.43128e-53	AT4G02380	senescence-associated gene 21 [Source:TAIR;Acc:AT4G02380]
-2.33605	9.55518e-08	AT1G65870	Dirigent protein 21 [Source:UniProtKB/Swiss-Prot;Acc:Q9SS03]
-2.33472	2.64912e-49	AT5G45380	DUR3 [Source:UniProtKB/TrEMBL;Acc:A0A178UG75]
-2.33469	1.11101e-06	AT5G40010	AAA-ATPase ASD, mitochondrial [Source:UniProtKB/Swiss-Prot;Acc:Q9FLD5]
-2.33236	1.12428e-17	AT3G10815	Putative RING zinc finger protein [Source:UniProtKB/TrEMBL;Acc:Q8L729]
-2.33199	4.18197e-59	AT1G65690	NDR1/HIN1-like protein 6 [Source:UniProtKB/Swiss-Prot;Acc:Q8LD98]
-2.33056	4.67052e-12	AT5G03355	Cysteine/histidine-rich C1 domain protein [Source:UniProtKB/TrEMBL;Acc:Q9LZF4]
-2.32847	7.08486e-10	AT3G11640	At3g11640 [Source:UniProtKB/TrEMBL;Acc:Q9SRN2]
-2.32611	1.9796e-05	AT2G13810	EDTS5 [Source:UniProtKB/TrEMBL;Acc:A0A178VQ02]
-2.32309	2.613e-07	AT3G25600	Probable calcium-binding protein CML16 [Source:UniProtKB/Swiss-Prot;Acc:Q9LI84]
-2.32193	7.95381e-05	AT5G25450	Cytochrome b-c1 complex subunit 7 [Source:UniProtKB/TrEMBL;Acc:A0A178UDJ6]
-2.31433	3.84433e-86	AT1G16260	Wall-associated receptor kinase-like 8 [Source:UniProtKB/Swiss-Prot;Acc:Q9SA25]
-2.31259	2.79773e-07	AT5G38396	F-box/LRR-repeat protein At5g38396 [Source:UniProtKB/Swiss-Prot;Acc:Q3E8L4]
-2.30893	0.00311301	AT3G28340	Hexosyltransferase (Fragment) [Source:UniProtKB/TrEMBL;Acc:W8QNM3]
-2.30152	2.98586e-45	AT1G64610	Transducin/WD40 repeat-like superfamily protein [Source:UniProtKB/TrEMBL;Acc:Q8VZK1]
-2.29852	1.23672e-11	AT4G40020	Myosin heavy chain-related protein [Source:UniProtKB/TrEMBL;Acc:Q9SMQ3]
-2.2976	0.028619	AT5G59820	Zinc finger protein ZAT12 [Source:UniProtKB/Swiss-Prot;Acc:Q42410]
-2.29639	4.68647e-21	AT2G22860	Phytosulfokines 2 [Source:UniProtKB/Swiss-Prot;Acc:O81003]
-2.29523	1.21447e-13	AT5G41550	Disease resistance protein (TIR-NBS-LRR class) family [Source:UniProtKB/TrEMBL;Acc:Q9FFS5]
-2.29374	5.75122e-48	AT3G47010	Beta-D-glucan exohydrolase-like protein [Source:UniProtKB/TrEMBL;Acc:Q9SD72]
-2.29156	8.06164e-82	AT3G47540	Chitinase family protein [Source:UniProtKB/TrEMBL;Acc:F4JBK4]
-2.28951	9.39291e-17	AT5G66630	Protein DA1-related 5 [Source:UniProtKB/Swiss-Prot;Acc:Q84WJ0]
-2.2877	1.79875e-18	AT5G25470	B3 domain-containing protein At5g25470 [Source:UniProtKB/Swiss-Prot;Acc:Q1PDT6]
-2.28688	0.000740049	AT1G43000	PLATZ transcription factor family protein [Source:TAIR;Acc:AT1G43000]
-2.28203	8.78485e-08	AT1G52855	At1g52855 [Source:UniProtKB/TrEMBL;Acc:Q8LC41]
-2.28109	3.87904e-64	AT3G07520	Glutamate receptor 1.4 [Source:UniProtKB/Swiss-Prot;Acc:Q8LGN1]
-2.27817	0.0127074	AT1G27730	Zinc finger protein ZAT10 [Source:UniProtKB/Swiss-Prot;Acc:Q96289]
-2.27684	0.0146007	AT5G09175	-
-2.27612	2.63974e-06	AT1G29290	Precursor of CEP14 [Source:UniProtKB/Swiss-Prot;Acc:Q52K95]
-2.27591	6.59681e-105	AT1G56510	Disease resistance protein ADR2 [Source:UniProtKB/Swiss-Prot;Acc:Q9C7X0]
-2.27058	3.25073e-11	AT5G52390	PAR1 protein [Source:UniProtKB/TrEMBL;Acc:Q9FHC1]
-2.27009	1.54365e-06	AT1G67980	Putative caffeoyl-CoA O-methyltransferase At1g67980 [Source:UniProtKB/Swiss-Prot;Acc:Q9C9W3]
-2.26946	0.0140392	AT5G48400	Glutamate receptor 1.2 [Source:UniProtKB/Swiss-Prot;Acc:Q9LV72]
-2.26673	3.6882e-59	AT4G11000	Ankyrin repeat family protein [Source:TAIR;Acc:AT4G11000]
-2.26303	0.0421658	AT4G26260	MIOX4 [Source:UniProtKB/TrEMBL;Acc:A0A178V1J3]
-2.26201	2.92991e-07	AT5G56510	Pumilio homolog 12 [Source:UniProtKB/Swiss-Prot;Acc:Q9LVC3]
-2.25859	1.0465e-69	AT5G61010	Exocyst complex component EXO70E2 [Source:UniProtKB/Swiss-Prot;Acc:Q9FNR3]
-2.25821	7.20435e-105	AT1G72700	Probable phospholipid-transporting ATPase 5 [Source:UniProtKB/Swiss-Prot;Acc:Q9SGG3]
-2.257	4.38842e-46	AT5G23510	unknown protein; BEST Arabidopsis thaliana protein match is: unknown protein (TAIR:AT5G23490.1); Has 35333 Blast hits to 34131 proteins in 2444 species: Archae - 798; Bacteria - 22429; Metazoa - 974; Fungi - 991; Plants - 531; Viruses - 0; Other Euk /.../s - 9610 (source: NCBI BLink). [Source:TAIR;Acc:AT5G23510]
-2.25375	0.0182058	AT1G16160	WAKL5 [Source:UniProtKB/TrEMBL;Acc:A0A178W9G0]
-2.25375	0.0233446	AT4G05071	unknown protein; Has 30201 Blast hits to 17322 proteins in 780 species: Archae - 12; Bacteria - 1396; Metazoa - 17338; Fungi - 3422; Plants - 5037; Viruses - 0; Other Eukaryotes - 2996 (source: NCBI BLink). [Source:TAIR;Acc:AT4G05071]
-2.24738	1.05735e-09	AT4G11170	Putative disease resistance protein At4g11170 [Source:UniProtKB/Swiss-Prot;Acc:O82500]
-2.24598	1.79693e-09	AT3G21330	Transcription factor bHLH87 [Source:UniProtKB/Swiss-Prot;Acc:Q8S3D2]
-2.23903	1.16554e-91	AT1G76970	TOM1-like protein 4 [Source:UniProtKB/Swiss-Prot;Acc:Q6NQK0]
-2.23704	0.00311221	AT2G42990	GDSL esterase/lipase At2g42990 [Source:UniProtKB/Swiss-Prot;Acc:Q67ZI9]
-2.23201	6.79297e-33	AT4G18250	receptor serine/threonine kinase, putative [Source:TAIR;Acc:AT4G18250]
-2.22982	1.23153e-31	AT3G27610	At3g27610 [Source:UniProtKB/TrEMBL;Acc:Q84Q59]
-2.22635	2.62273e-57	AT5G44820	At5g44820 [Source:UniProtKB/TrEMBL;Acc:Q147R7]
-2.22383	4.72217e-47	AT1G21520	Uncharacterized protein At1g21520 [Source:UniProtKB/TrEMBL;Acc:Q8GYE6]
-2.22239	0.00538612	AT4G15075	FBD-like domain family protein [Source:UniProtKB/TrEMBL;Acc:F4JJD2]
-2.21986	2.76374e-135	AT5G02490	Probable mediator of RNA polymerase II transcription subunit 37c [Source:UniProtKB/Swiss-Prot;Acc:P22954]
-2.21879	5.69084e-24	AT2G46150	Late embryogenesis abundant (LEA) hydroxyproline-rich glycoprotein family [Source:UniProtKB/TrEMBL;Acc:O82354]
-2.21672	4.63731e-61	AT3G11840	E3 ubiquitin-protein ligase PUB24 [Source:UniProtKB/Swiss-Prot;Acc:Q9SF15]
-2.21594	6.59906e-05	AT2G30660	Probable 3-hydroxyisobutyryl-CoA hydrolase 3 [Source:UniProtKB/Swiss-Prot;Acc:Q6NMB0]
-2.21513	4.46002e-10	AT2G40140	Zinc finger CCCH domain-containing protein 29 [Source:UniProtKB/Swiss-Prot;Acc:Q9XEE6]
-2.21285	2.33538e-38	AT4G39890	RABH1c [Source:UniProtKB/TrEMBL;Acc:A0A178V1R4]
-2.20945	1.43539e-07	AT4G15700	Monothiol glutaredoxin-S3 [Source:UniProtKB/Swiss-Prot;Acc:O23421]
-2.20852	0.0110704	AT4G29780	Nuclease [Source:UniProtKB/TrEMBL;Acc:Q84J48]
-2.20587	5.7555e-83	AT1G72680	CAD1 [Source:UniProtKB/TrEMBL;Acc:A0A178WLT3]
-2.20237	2.10782e-34	AT1G17430	Alpha/beta-Hydrolases superfamily protein [Source:UniProtKB/TrEMBL;Acc:Q9LNR2]
-2.20126	2.08591e-16	AT3G04060	NAC domain-containing protein 46 [Source:UniProtKB/Swiss-Prot;Acc:Q9SQQ6]
-2.19967	0.000441194	AT1G15625	E3 ubiquitin-protein ligase [Source:UniProtKB/TrEMBL;Acc:Q9M9D3]
-2.19878	3.06307e-05	AT1G66173	other RNA [Source:TAIR;Acc:AT1G66173]
-2.19639	0.0375546	AT3G29690	HXXXD-type acyl-transferase family protein [Source:UniProtKB/TrEMBL;Acc:Q9LRQ6]
-2.19487	1.05596e-23	AT1G02230	NAC domain-containing protein 4 [Source:UniProtKB/Swiss-Prot;Acc:O81913]
-2.19388	9.62498e-46	AT4G27480	Core-2/I-branching beta-1,6-N-acetylglucosaminyltransferase family protein [Source:UniProtKB/TrEMBL;Acc:F4JIW2]
-2.19221	1.14346e-17	AT1G48605	Probable phosphopantothenoylcysteine decarboxylase [Source:UniProtKB/Swiss-Prot;Acc:P94063]
-2.19105	7.04343e-44	AT3G14280	At3g14280 [Source:UniProtKB/TrEMBL;Acc:Q9LUL9]
-2.18847	3.1821e-36	AT5G46230	At5g46230 [Source:UniProtKB/TrEMBL;Acc:Q9FL37]
-2.18778	5.59095e-55	AT3G09010	Protein kinase superfamily protein [Source:UniProtKB/TrEMBL;Acc:Q8LF75]
-2.18257	1.01824e-29	AT3G16990	Bifunctional TENA-E protein [Source:UniProtKB/Swiss-Prot;Acc:Q9ASY9]
-2.17476	2.63893e-28	AT5G25820	Exostosin family protein [Source:UniProtKB/TrEMBL;Acc:Q0WPG1]
-2.1724	1.11032e-49	AT4G04695	Calcium-dependent protein kinase 31 [Source:UniProtKB/Swiss-Prot;Acc:Q9S9V0]
-2.16265	7.98342e-07	AT2G29350	SAG13 [Source:UniProtKB/TrEMBL;Acc:A0A178VTS8]
-2.16227	0.00514507	ENSRNA049495577	Group II catalytic intron
-2.16177	2.78766e-46	AT4G26070	NMAPKK [Source:UniProtKB/TrEMBL;Acc:A0A178V3F2]
-2.15717	9.08616e-17	AT5G24110	Probable WRKY transcription factor 30 [Source:UniProtKB/Swiss-Prot;Acc:Q9FL62]
-2.15087	9.82315e-100	AT4G33300	Probable disease resistance protein At4g33300 [Source:UniProtKB/Swiss-Prot;Acc:Q9SZA7]
-2.14886	7.12724e-05	AT3G01513	Putative uncharacterized protein [Source:UniProtKB/TrEMBL;Acc:Q6DR30]
-2.14798	8.60653e-23	AT3G08970	TMS1 [Source:UniProtKB/TrEMBL;Acc:A0A178VJB6]
-2.14769	1.1915e-55	AT1G76980	At1g76980 [Source:UniProtKB/TrEMBL;Acc:O49284]
-2.14643	1.76515e-45	AT1G03400	2-oxoglutarate (2OG) and Fe(II)-dependent oxygenase superfamily protein [Source:TAIR;Acc:AT1G03400]
-2.14202	0.00153408	AT4G38830	Cysteine-rich receptor-like protein kinase 26 [Source:UniProtKB/Swiss-Prot;Acc:Q9T0J1]
-2.14102	7.74891e-88	AT4G26270	ATP-dependent 6-phosphofructokinase 3 [Source:UniProtKB/Swiss-Prot;Acc:Q94AA4]
-2.13925	9.14983e-41	AT4G21610	Protein LOL2 [Source:UniProtKB/Swiss-Prot;Acc:O65426]
-2.13289	1.62708e-32	AT4G37370	Cytochrome P450, family 81, subfamily D, polypeptide 8 [Source:UniProtKB/TrEMBL;Acc:Q9SZT7]
-2.13244	3.67375e-45	AT5G41750	Disease resistance protein (TIR-NBS-LRR class) family [Source:UniProtKB/TrEMBL;Acc:Q9LSX5]
-2.13222	4.05997e-07	AT1G77145	T14N5.3 protein [Source:UniProtKB/TrEMBL;Acc:O80651]
-2.13141	9.19183e-22	AT3G12830	Auxin-responsive protein SAUR72 [Source:UniProtKB/Swiss-Prot;Acc:Q9LTV3]
-2.13128	5.26959e-84	AT3G26210	Cytochrome P450 71B23 [Source:UniProtKB/Swiss-Prot;Acc:Q9LTM0]
-2.12847	0.00462884	AT1G09287	-
-2.12834	7.79064e-33	AT5G64510	Tunicamycin induced protein [Source:UniProtKB/TrEMBL;Acc:Q84JN2]
-2.1281	0.00236472	AT1G12940	High affinity nitrate transporter 2.5 [Source:UniProtKB/Swiss-Prot;Acc:Q9LPV5]
-2.12308	1.18627e-51	AT5G07770	Actin-binding FH2 protein [Source:TAIR;Acc:AT5G07770]
-2.12199	0.0150348	AT3G57110	Exonuclease V [Source:UniProtKB/TrEMBL;Acc:Q9M1I9]
-2.11548	2.13007e-07	AT5G25640	Rhomboid-related intramembrane serine protease family protein [Source:TAIR;Acc:AT5G25640]
-2.11548	0.00515565	AT3G61450	Syntaxin of plants 73 [Source:UniProtKB/TrEMBL;Acc:F4JEA3]
-2.11326	3.17134e-45	AT1G12290	Probable disease resistance protein At1g12290 [Source:UniProtKB/Swiss-Prot;Acc:P60839]
-2.11221	0.00126821	AT1G20310	Syringolide-induced protein [Source:UniProtKB/TrEMBL;Acc:Q8L956]
-2.11163	6.73757e-15	AT5G67450	ZF1 [Source:UniProtKB/TrEMBL;Acc:A0A178UTI6]
-2.10943	6.52752e-08	AT2G32670	Vesicle-associated membrane protein 725 [Source:UniProtKB/Swiss-Prot;Acc:O48850]
-2.10925	6.05171e-16	AT3G16030	Lectin protein kinase family protein [Source:UniProtKB/TrEMBL;Acc:A0A1I9LPL5]
-2.10349	3.24286e-40	AT1G74440	ER membrane protein, putative (DUF962) [Source:UniProtKB/TrEMBL;Acc:Q9CA70]
-2.1001	6.89095e-75	AT3G29240	AT3g29240/MXO21_9 [Source:UniProtKB/TrEMBL;Acc:Q9LS71]
-2.09936	1.33959e-45	AT2G16870	Disease resistance protein (TIR-NBS-LRR class) family [Source:UniProtKB/TrEMBL;Acc:Q9ZVX6]
-2.09891	2.4988e-34	AT5G46050	Protein NRT1/ PTR FAMILY 5.2 [Source:UniProtKB/Swiss-Prot;Acc:Q9FNL7]
-2.09822	2.74314e-90	AT5G52540	Keratin-associated protein, putative (DUF819) [Source:UniProtKB/TrEMBL;Acc:Q9LTG3]
-2.09811	9.30554e-71	AT2G46430	Probable cyclic nucleotide-gated ion channel 3 [Source:UniProtKB/Swiss-Prot;Acc:Q9SKD7]
-2.09707	1.48481e-08	AT2G23810	TET8 [Source:UniProtKB/TrEMBL;Acc:A0A178VYI5]
-2.09665	1.83043e-25	AT3G50280	Uncharacterized acetyltransferase At3g50280 [Source:UniProtKB/Swiss-Prot;Acc:Q9SND9]
-2.09403	1.73338e-46	AT5G42250	Alcohol dehydrogenase-like 7 [Source:UniProtKB/Swiss-Prot;Acc:Q9FH04]
-2.09402	8.41096e-07	AT5G27420	E3 ubiquitin-protein ligase ATL31 [Source:UniProtKB/Swiss-Prot;Acc:Q8LGA5]
-2.0906	0.00589791	AT3G27950	GDSL-like Lipase/Acylhydrolase superfamily protein [Source:TAIR;Acc:AT3G27950]
-2.08692	8.94923e-67	AT3G01290	HIR2 [Source:UniProtKB/TrEMBL;Acc:A0A178V7M0]
-2.08262	1.97463e-09	AT4G00960	Putative receptor-like protein kinase At4g00960 [Source:UniProtKB/Swiss-Prot;Acc:O23082]
-2.08246	0.000289151	AT1G69490	NAP [Source:UniProtKB/TrEMBL;Acc:A0A178W8K0]
-2.08085	9.28801e-99	AT1G68710	ATPase E1-E2 type family protein / haloacid dehalogenase-like hydrolase family protein [Source:TAIR;Acc:AT1G68710]
-2.07808	6.90062e-89	AT1G03210	Phenazine biosynthesis PhzC/PhzF protein [Source:TAIR;Acc:AT1G03210]
-2.07529	0.0475023	AT3G27473	CHP-rich zinc finger protein-like [Source:UniProtKB/TrEMBL;Acc:Q9LTY3]
-2.07517	9.70075e-18	AT3G06755	-
-2.07455	3.15225e-05	AT1G16420	Metacaspase-8 [Source:UniProtKB/Swiss-Prot;Acc:Q9SA41]
-2.07166	2.06245e-18	AT1G14260	At1g14260 [Source:UniProtKB/TrEMBL;Acc:Q4PS45]
-2.07039	0.000386238	AT3G59880	Expressed protein [Source:UniProtKB/TrEMBL;Acc:Q5BPM7]
-2.0703	3.5894e-30	AT3G08870	Concanavalin A-like lectin protein kinase family protein [Source:UniProtKB/TrEMBL;Acc:A0A1I9LTB8]
-2.06928	4.42715e-46	AT5G58940	Calmodulin-binding receptor-like cytoplasmic kinase 1 [Source:UniProtKB/Swiss-Prot;Acc:Q9FIL7]
-2.06752	3.22557e-19	AT5G61070	Histone deacetylase 18 [Source:UniProtKB/Swiss-Prot;Acc:Q8LRK8]
-2.06176	5.58849e-75	AT4G23170	Putative cysteine-rich receptor-like protein kinase 9 [Source:UniProtKB/Swiss-Prot;Acc:O65469]
-2.06112	2.21152e-43	AT3G16720	RING-H2 finger protein ATL2 [Source:UniProtKB/Swiss-Prot;Acc:Q8L9T5]
-2.06059	7.47543e-76	AT4G23570	phosphatase-related [Source:TAIR;Acc:AT4G23570]
-2.05858	6.5394e-54	AT3G14470	Putative disease resistance RPP13-like protein 1 [Source:UniProtKB/Swiss-Prot;Acc:Q9LRR4]
-2.05741	1.32736e-11	AT5G44568	Transmembrane protein [Source:UniProtKB/TrEMBL;Acc:Q570K8]
-2.05576	1.53884e-15	AT1G71910	At1g71910 [Source:UniProtKB/TrEMBL;Acc:Q9C8X0]
-2.05261	1.11375e-22	AT5G38260	LEAF RUST 10 DISEASE-RESISTANCE LOCUS RECEPTOR-LIKE PROTEIN KINASE-like 2.1 [Source:UniProtKB/Swiss-Prot;Acc:Q9FF31]
-2.05215	3.76839e-42	AT5G45110	NPR3 [Source:UniProtKB/TrEMBL;Acc:A0A178UGU4]
-2.04895	4.64396e-08	AT3G52400	Syntaxin-122 [Source:UniProtKB/Swiss-Prot;Acc:Q9SVC2]
-2.04801	1.19444e-74	AT1G34750	Probable protein phosphatase 2C 10 [Source:UniProtKB/Swiss-Prot;Acc:Q9S9Z7]
-2.04496	1.12825e-58	AT5G66910	Probable disease resistance protein At5g66910 [Source:UniProtKB/Swiss-Prot;Acc:Q9FKZ0]
-2.04439	2.12569e-63	AT1G67850	AT1G67850 protein [Source:UniProtKB/TrEMBL;Acc:Q94F37]
-2.04317	1.08282e-10	AT5G48290	Heavy metal transport/detoxification superfamily protein [Source:TAIR;Acc:AT5G48290]
-2.04097	4.40946e-18	AT4G23450	RING/U-box superfamily protein [Source:UniProtKB/TrEMBL;Acc:F4JNK0]
-2.04033	1.00873e-78	AT3G45260	Protein indeterminate-domain 9 [Source:UniProtKB/Swiss-Prot;Acc:Q944L3]
-2.04022	7.81017e-52	AT3G04210	At3g04210/T6K12_17 [Source:UniProtKB/TrEMBL;Acc:Q8H1N6]
-2.03957	2.53168e-59	AT3G45620	Transducin/WD40 repeat-like superfamily protein [Source:UniProtKB/TrEMBL;Acc:F4J6P6]
-2.03953	1.73373e-24	AT1G30280	Chaperone DnaJ-domain superfamily protein [Source:UniProtKB/TrEMBL;Acc:Q9C752]
-2.03682	3.83365e-10	AT2G22500	Mitochondrial uncoupling protein 5 [Source:UniProtKB/Swiss-Prot;Acc:Q9SJY5]
-2.03429	9.75804e-78	AT3G13380	Receptor-like protein kinase BRI1-like 3 [Source:UniProtKB/Swiss-Prot;Acc:Q9LJF3]
-2.03041	0.00756842	AT5G39100	germin-like protein 6 [Source:TAIR;Acc:AT5G39100]
-2.02466	0.00324046	AT2G34580	CONTAINS InterPro DOMAIN/s: Herpesvirus UL139, cytomegalovirus (InterPro:IPR021042); Has 30201 Blast hits to 17322 proteins in 780 species: Archae - 12; Bacteria - 1396; Metazoa - 17338; Fungi - 3422; Plants - 5037; Viruses - 0; Other Eukaryotes - 2 /.../ource: NCBI BLink). [Source:TAIR;Acc:AT2G34580]
-2.02377	4.42475e-55	AT1G18570	Transcription factor MYB51 [Source:UniProtKB/Swiss-Prot;Acc:O49782]
-2.02355	1.52496e-68	AT3G51430	Protein STRICTOSIDINE SYNTHASE-LIKE 5 [Source:UniProtKB/Swiss-Prot;Acc:Q9CAZ7]
-2.0199	0.0438255	AT5G36970	NHL25 [Source:UniProtKB/TrEMBL;Acc:A0A178UFH9]
-2.01837	1.19205e-34	AT1G17600	Disease resistance protein (TIR-NBS-LRR class) family [Source:UniProtKB/TrEMBL;Acc:F4I901]
-2.01791	4.59865e-60	AT4G02420	L-type lectin-domain containing receptor kinase IV.4 [Source:UniProtKB/Swiss-Prot;Acc:O81291]
-2.01601	1.51632e-08	AT2G28160	Transcription factor FER-LIKE IRON DEFICIENCY-INDUCED TRANSCRIPTION FACTOR [Source:UniProtKB/Swiss-Prot;Acc:Q0V7X4]
-2.01176	4.57405e-31	AT5G27920	At5g27920 [Source:UniProtKB/TrEMBL;Acc:Q8GZ31]
-2.01094	3.13861e-39	AT5G65090	Type I inositol polyphosphate 5-phosphatase 5 [Source:UniProtKB/Swiss-Prot;Acc:Q66GQ6]
-2.00888	4.47886e-07	AT3G55840	Nematode resistance protein-like HSPRO1 [Source:UniProtKB/Swiss-Prot;Acc:Q9LY61]
-2.0054	5.62078e-128	AT1G72930	Toll/interleukin-1 receptor-like protein [Source:UniProtKB/Swiss-Prot;Acc:Q9SSN3]
-2.00388	2.9991e-65	AT5G04930	Phospholipid-transporting ATPase [Source:UniProtKB/TrEMBL;Acc:A0A178UBN1]
-2.00357	2.34349e-08	AT3G09790	Polyubiquitin 8 [Source:UniProtKB/Swiss-Prot;Acc:Q39256]
-2	6.1362e-21	AT3G19580	ZF2 [Source:UniProtKB/TrEMBL;Acc:A0A178VJ97]
-1.99956	1.41536e-35	AT5G42440	At5g42440 [Source:UniProtKB/TrEMBL;Acc:Q9FIH3]
-1.99944	2.1185e-08	AT1G72920	Similar to part of disease resistance protein [Source:UniProtKB/TrEMBL;Acc:Q9SSN4]
-1.99851	4.53802e-61	AT5G52810	Protein SAR DEFICIENT 4 [Source:UniProtKB/Swiss-Prot;Acc:Q9FLY0]
-1.99807	4.03348e-52	AT5G18780	FBD-associated F-box protein At5g18780 [Source:UniProtKB/Swiss-Prot;Acc:Q56YH2]
-1.99776	2.31558e-53	AT5G60280	L-type lectin-domain containing receptor kinase I.8 [Source:UniProtKB/Swiss-Prot;Acc:Q9LSR9]
-1.99743	7.18751e-40	AT4G18880	HSF A4A [Source:UniProtKB/TrEMBL;Acc:A0A178UUP9]
-1.99436	3.57332e-44	AT2G23680	Cold-regulated 413 plasma membrane protein 3 [Source:UniProtKB/Swiss-Prot;Acc:O64834]
-1.99107	1.47496e-06	AT1G56060	unknown protein; BEST Arabidopsis thaliana protein match is: unknown protein (TAIR:AT2G32210.1); Has 180 Blast hits to 180 proteins in 22 species: Archae - 0; Bacteria - 0; Metazoa - 0; Fungi - 10; Plants - 170; Viruses - 0; Other Eukaryotes - 0 (so /.../NCBI BLink). [Source:TAIR;Acc:AT1G56060]
-1.98995	0.00088341	AT2G40740	WRKY DNA-binding protein 55 [Source:TAIR;Acc:AT2G40740]
-1.98958	2.41352e-70	AT1G21270	Wall-associated receptor kinase 2 [Source:UniProtKB/Swiss-Prot;Acc:Q9LMP1]
-1.98812	1.61724e-54	AT1G04980	Protein disulfide-isomerase like 2-2 [Source:UniProtKB/Swiss-Prot;Acc:Q9MAU6]
-1.98721	4.0315e-19	AT1G02470	Polyketide cyclase/dehydrase and lipid transport superfamily protein [Source:UniProtKB/TrEMBL;Acc:F4HXI8]
-1.98283	1.1632e-33	AT3G44860	Farnesoic acid carboxyl-O-methyltransferase [Source:UniProtKB/Swiss-Prot;Acc:Q9FYC4]
-1.98213	2.17473e-61	AT4G11900	G-type lectin S-receptor-like serine/threonine-protein kinase At4g11900 [Source:UniProtKB/Swiss-Prot;Acc:Q9T058]
-1.98089	8.79864e-05	AT2G45570	Cytochrome P450 76C2 [Source:UniProtKB/Swiss-Prot;Acc:O64637]
-1.98037	0.00156317	AT1G45063	Copper ion binding / electron carrier protein [Source:UniProtKB/TrEMBL;Acc:F4HPM4]
-1.98005	1.26242e-106	AT1G77510	Protein disulfide isomerase-like 1-2 [Source:UniProtKB/Swiss-Prot;Acc:Q9SRG3]
-1.97886	6.19778e-63	AT1G29240	F28N24.8 protein [Source:UniProtKB/TrEMBL;Acc:Q9LP52]
-1.97577	5.37146e-46	AT5G50200	High-affinity nitrate transporter 3.1 [Source:UniProtKB/Swiss-Prot;Acc:Q9FGS5]
-1.97424	5.98793e-26	AT3G26500	Plant intracellular Ras-group-related LRR protein 2 [Source:UniProtKB/Swiss-Prot;Acc:Q9LRV8]
-1.97193	1.06439e-37	AT1G51790	Leucine-rich repeat protein kinase family protein [Source:TAIR;Acc:AT1G51790]
-1.97107	2.0913e-42	AT4G22590	Trehalose 6-phosphate phosphatase [Source:UniProtKB/TrEMBL;Acc:A0A178UWC3]
-1.96914	9.06066e-65	AT2G41090	Calmodulin-like protein 10 [Source:UniProtKB/Swiss-Prot;Acc:P30187]
-1.96781	3.88335e-49	AT2G02810	UDP-galactose/UDP-glucose transporter 1 [Source:UniProtKB/Swiss-Prot;Acc:O64503]
-1.96771	6.28659e-65	AT5G04720	Probable disease resistance protein At5g04720 [Source:UniProtKB/Swiss-Prot;Acc:Q9LZ25]
-1.96631	3.1502e-51	AT1G24148	unknown protein; FUNCTIONS IN: molecular_function unknown; INVOLVED IN: biological_process unknown; LOCATED IN: cellular_component unknown; BEST Arabidopsis thaliana protein match is: unknown protein (TAIR:AT1G24147.1). [Source:TAIR;Acc:AT1G24148]
-1.96611	0.00121427	AT3G13610	Feruloyl CoA ortho-hydroxylase 1 [Source:UniProtKB/Swiss-Prot;Acc:Q9LHN8]
-1.96469	1.26933e-42	AT1G01010	NAC domain-containing protein 1 [Source:UniProtKB/Swiss-Prot;Acc:Q0WV96]
-1.964	3.34677e-05	AT3G46620	E3 ubiquitin-protein ligase RDUF1 [Source:UniProtKB/Swiss-Prot;Acc:Q9SNB6]
-1.96145	9.63372e-44	AT4G36990	Heat stress transcription factor B-1 [Source:UniProtKB/Swiss-Prot;Acc:Q96320]
-1.96017	9.34603e-07	AT3G50060	Transcription factor MYB77 [Source:UniProtKB/Swiss-Prot;Acc:Q9SN12]
-1.95359	1.05783e-19	AT5G47130	Bax inhibitor-1 family protein [Source:TAIR;Acc:AT5G47130]
-1.95328	8.20264e-28	AT4G29740	Cytokinin dehydrogenase 4 [Source:UniProtKB/Swiss-Prot;Acc:Q9FUJ2]
-1.95314	3.87229e-30	AT4G01750	UDP-D-xylose:L-fucose alpha-1,3-D-xylosyltransferase [Source:UniProtKB/Swiss-Prot;Acc:Q9ZSJ0]
-1.95117	5.66955e-67	AT5G02290	Probable serine/threonine-protein kinase PBL11 [Source:UniProtKB/Swiss-Prot;Acc:P43293]
-1.95087	6.13634e-09	AT3G47220	Phosphoinositide phospholipase C 9 [Source:UniProtKB/Swiss-Prot;Acc:Q6NMA7]
-1.95023	2.46651e-61	AT2G17120	LysM domain-containing GPI-anchored protein 2 [Source:UniProtKB/Swiss-Prot;Acc:O23006]
-1.94785	2.34602e-43	AT5G06750	Probable protein phosphatase 2C 68 [Source:UniProtKB/Swiss-Prot;Acc:Q84JD5]
-1.94665	9.37354e-20	AT4G01740	Cysteine/Histidine-rich C1 domain family protein [Source:UniProtKB/TrEMBL;Acc:Q9ZSI9]
-1.94657	1.74926e-53	AT2G44180	Methionine aminopeptidase 2A [Source:UniProtKB/Swiss-Prot;Acc:Q9FV49]
-1.94439	5.11412e-28	AT5G25930	Kinase family with leucine-rich repeat domain-containing protein [Source:UniProtKB/TrEMBL;Acc:Q9XGZ2]
-1.94212	2.21962e-11	AT2G26150	Heat stress transcription factor A-2 [Source:UniProtKB/Swiss-Prot;Acc:O80982]
-1.94111	2.88036e-11	AT5G64490	Pumilio homolog 26 [Source:UniProtKB/Swiss-Prot;Acc:Q9FGE7]
-1.93976	9.23952e-31	AT3G45290	MLO-like protein 3 [Source:UniProtKB/Swiss-Prot;Acc:Q94KB9]
-1.9386	3.76846e-06	AT4G16857	Disease resistance protein (TIR-NBS-LRR class) family protein [Source:UniProtKB/TrEMBL;Acc:A0A1P8B877]
-1.93618	0.000481708	XLOC_029066	-
-1.9349	0.0443618	AT3G10600	Cationic amino acid transporter 7, chloroplastic [Source:UniProtKB/Swiss-Prot;Acc:Q9SQZ0]
-1.93265	1.64771e-48	AT2G13790	Somatic embryogenesis receptor kinase 4 [Source:UniProtKB/Swiss-Prot;Acc:Q9SKG5]
-1.93147	2.5665e-44	AT1G13750	Probable inactive purple acid phosphatase 1 [Source:UniProtKB/Swiss-Prot;Acc:Q9LMX4]
-1.93065	1.48261e-23	AT2G24240	BTB/POZ domain-containing protein At2g24240 [Source:UniProtKB/Swiss-Prot;Acc:Q9ZUH1]
-1.93055	2.41877e-70	AT2G46600	Calcium-binding protein KIC [Source:UniProtKB/Swiss-Prot;Acc:Q9ZPX9]
-1.92919	1.5624e-72	AT4G29900	Calcium-transporting ATPase 10, plasma membrane-type [Source:UniProtKB/Swiss-Prot;Acc:Q9SZR1]
-1.92856	2.3184e-17	AT5G10440	Cyclin-D4-2 [Source:UniProtKB/Swiss-Prot;Acc:Q0WQN9]
-1.92844	0.0469902	AT4G13395	DVL10 [Source:UniProtKB/TrEMBL;Acc:Q6IM91]
-1.92663	6.75093e-35	AT2G13800	Somatic embryogenesis receptor kinase 5 [Source:UniProtKB/Swiss-Prot;Acc:Q8LPS5]
-1.9255	2.6118e-40	AT4G23240	Putative cysteine-rich receptor-like protein kinase 16 [Source:UniProtKB/Swiss-Prot;Acc:O65476]
-1.92542	3.99846e-47	AT2G30140	UDP-glycosyltransferase 87A2 [Source:UniProtKB/Swiss-Prot;Acc:O64733]
-1.92441	1.41704e-88	AT2G41410	Probable calcium-binding protein CML35 [Source:UniProtKB/Swiss-Prot;Acc:P30188]
-1.91249	1.10984e-73	AT5G48380	Probably inactive leucine-rich repeat receptor-like protein kinase At5g48380 [Source:UniProtKB/Swiss-Prot;Acc:Q9ASS4]
-1.90904	8.84653e-23	AT5G05190	Protein ENHANCED DISEASE RESISTANCE 4 [Source:UniProtKB/Swiss-Prot;Acc:Q9FHK4]
-1.90727	2.3571e-33	AT4G26060	At4g26060 [Source:UniProtKB/TrEMBL;Acc:Q9SZI0]
-1.90689	3.72358e-07	AT3G49930	At3g49930 [Source:UniProtKB/TrEMBL;Acc:Q9SN24]
-1.90503	4.16064e-72	AT4G34480	Glucan endo-1,3-beta-glucosidase 7 [Source:UniProtKB/Swiss-Prot;Acc:Q9M069]
-1.90358	3.00958e-95	AT1G03290	ELKS/Rab6-interacting/CAST family protein [Source:UniProtKB/TrEMBL;Acc:Q9ZVT0]
-1.90357	1.47756e-68	AT2G40270	Inactive receptor-like serine/threonine-protein kinase At2g40270 [Source:UniProtKB/Swiss-Prot;Acc:Q9SIZ4]
-1.90014	5.18543e-06	AT4G27450	AT4g27450/F27G19_50 [Source:UniProtKB/TrEMBL;Acc:Q93V62]
-1.89626	8.88067e-53	AT2G30550	Phospholipase A1-Igamma2, chloroplastic [Source:UniProtKB/Swiss-Prot;Acc:Q3EBR6]
-1.89432	2.05033e-64	AT5G14930	Senescence-associated carboxylesterase 101 [Source:UniProtKB/Swiss-Prot;Acc:Q4F883]
-1.89421	1.22213e-39	AT5G52640	Heat shock protein 90-1 [Source:UniProtKB/Swiss-Prot;Acc:P27323]
-1.89121	3.20445e-06	AT5G13080	WRKY75 [Source:UniProtKB/TrEMBL;Acc:A0A178UJF4]
-1.89038	1.60405e-30	AT5G21900	At5g21900 [Source:UniProtKB/TrEMBL;Acc:Q9C597]
-1.88322	2.13407e-22	AT1G13830	Carbohydrate-binding X8 domain superfamily protein [Source:TAIR;Acc:AT1G13830]
-1.88191	1.70198e-39	AT1G50740	Protein FATTY ACID EXPORT 5 [Source:UniProtKB/Swiss-Prot;Acc:Q9C6T7]
-1.88042	0.0161407	AT3G13435	At3g13435 [Source:UniProtKB/TrEMBL;Acc:Q8GZ07]
-1.87999	7.59944e-72	AT4G11840	Phospholipase D gamma 3 [Source:UniProtKB/Swiss-Prot;Acc:Q9T052]
-1.87927	2.35809e-05	AT2G44840	Ethylene-responsive transcription factor 13 [Source:UniProtKB/Swiss-Prot;Acc:Q8L9K1]
-1.87901	2.19011e-11	AT1G79400	CHX2 [Source:UniProtKB/TrEMBL;Acc:A0A178WC88]
-1.87713	2.98724e-18	AT1G56550	Glycosyltransferase [Source:UniProtKB/TrEMBL;Acc:A0A178W8K3]
-1.87687	8.9231e-57	AT1G05570	Callose synthase 1 [Source:UniProtKB/Swiss-Prot;Acc:Q9AUE0]
-1.87344	8.05292e-17	AT1G03340	F15K9.6 [Source:UniProtKB/TrEMBL;Acc:Q9ZVT5]
-1.87323	1.51037e-26	AT2G16595	At2g16595 [Source:UniProtKB/TrEMBL;Acc:Q6AWS7]
-1.87072	0.00238875	AT5G44630	Alpha-barbatene synthase [Source:UniProtKB/Swiss-Prot;Acc:Q4KSH9]
-1.87005	8.64627e-23	AT4G15070	Cysteine/Histidine-rich C1 domain family protein [Source:UniProtKB/TrEMBL;Acc:O23361]
-1.86969	3.29722e-63	AT1G24150	formin homologue 4 [Source:TAIR;Acc:AT1G24150]
-1.86428	9.2161e-62	AT3G51890	Clathrin light chain 3 [Source:UniProtKB/Swiss-Prot;Acc:F4J5M9]
-1.86392	3.68295e-24	AT3G25780	Allene oxide cyclase 3, chloroplastic [Source:UniProtKB/Swiss-Prot;Acc:Q9LS01]
-1.85996	2.13654e-12	AT3G14060	At3g14060 [Source:UniProtKB/TrEMBL;Acc:Q9LVJ2]
-1.85938	2.91377e-12	AT5G59220	Probable protein phosphatase 2C 78 [Source:UniProtKB/Swiss-Prot;Acc:Q9FIF5]
-1.85872	4.62807e-19	AT1G72890	Disease resistance protein (TIR-NBS class) [Source:UniProtKB/TrEMBL;Acc:F4IF04]
-1.85858	1.09592e-05	AT3G06490	Transcription factor MYB108 [Source:UniProtKB/Swiss-Prot;Acc:Q9LDE1]
-1.85816	1.10937e-26	AT3G59010	Pectinesterase [Source:UniProtKB/TrEMBL;Acc:A0A178V613]
-1.85316	2.81858e-09	AT5G06330	At5g06330 [Source:UniProtKB/TrEMBL;Acc:Q9FNH5]
-1.85029	7.40664e-06	AT1G13260	AP2/ERF and B3 domain-containing transcription factor RAV1 [Source:UniProtKB/Swiss-Prot;Acc:Q9ZWM9]
-1.84884	4.81786e-23	AT1G69520	S-adenosyl-L-methionine-dependent methyltransferases superfamily protein [Source:TAIR;Acc:AT1G69520]
-1.848	3.77232e-05	AT2G42350	RING-H2 finger protein ATL40 [Source:UniProtKB/Swiss-Prot;Acc:Q9SLC4]
-1.84545	4.72862e-41	AT3G60450	Phosphoglycerate mutase family protein [Source:UniProtKB/TrEMBL;Acc:A0A1I9LN21]
-1.84355	1.29306e-21	AT4G00240	Phospholipase D beta 2 [Source:UniProtKB/Swiss-Prot;Acc:O23078]
-1.84259	6.73261e-07	AT1G31290	Protein argonaute 3 [Source:UniProtKB/Swiss-Prot;Acc:Q9SHF2]
-1.84253	1.0374e-12	AT5G38212	Potential natural antisense gene, locus overlaps with AT5G38210 [Source:TAIR;Acc:AT5G38212]
-1.84181	2.94246e-50	AT2G26440	Probable pectinesterase/pectinesterase inhibitor 12 [Source:UniProtKB/Swiss-Prot;Acc:O48711]
-1.84079	2.22604e-27	AT3G24090	GFAT [Source:UniProtKB/TrEMBL;Acc:A0A178V979]
-1.83953	0.0492505	AT5G65130	Integrase-type DNA-binding superfamily protein [Source:TAIR;Acc:AT5G65130]
-1.83713	1.8562e-24	AT1G10690	Cyclin-dependent protein kinase inhibitor SMR8 [Source:UniProtKB/Swiss-Prot;Acc:Q9SAD3]
-1.83702	3.28719e-05	AT4G15270	Glucosyltransferase-like protein (Fragment) [Source:UniProtKB/TrEMBL;Acc:W8PV66]
-1.82901	1.71232e-08	AT1G33030	At1g33030 [Source:UniProtKB/TrEMBL;Acc:Q9MAP0]
-1.82821	1.1989e-06	AT5G20230	SAG14 [Source:UniProtKB/TrEMBL;Acc:A0A178UM84]
-1.82725	4.21315e-07	XLOC_016378	Pathogenesis-related protein PR-4B
-1.82597	1.21005e-05	AT4G14640	Calmodulin-like protein 8 [Source:UniProtKB/Swiss-Prot;Acc:O23320]
-1.82517	0.00140196	AT1G53660	nodulin MtN21 /EamA-like transporter family protein [Source:TAIR;Acc:AT1G53660]
-1.8215	0.000112487	AT1G72000	Probable alkaline/neutral invertase F [Source:UniProtKB/Swiss-Prot;Acc:Q9C560]
-1.82077	7.24407e-05	AT1G52890	NAC domain-containing protein 19 [Source:UniProtKB/Swiss-Prot;Acc:Q9C932]
-1.81958	7.80279e-44	AT5G19930	Protein PGR [Source:UniProtKB/Swiss-Prot;Acc:Q0WP96]
-1.81953	5.30391e-23	AT1G56520	Disease resistance protein (TIR-NBS-LRR class) family [Source:UniProtKB/TrEMBL;Acc:F4I552]
-1.81915	4.94429e-09	AT2G31020	ORP1A [Source:UniProtKB/TrEMBL;Acc:A0A178VQE1]
-1.81538	6.32886e-12	AT5G64530	NAC domain-containing protein 104 [Source:UniProtKB/Swiss-Prot;Acc:Q8GWK6]
-1.81404	1.78828e-37	AT5G26340	STP13 [Source:UniProtKB/TrEMBL;Acc:A0A178UHA7]
-1.81182	4.6839e-68	AT3G09830	Serine/threonine-protein kinase PCRK1 [Source:UniProtKB/Swiss-Prot;Acc:Q9SF86]
-1.80735	0.0109125	AT1G01480	1-aminocyclopropane-1-carboxylate synthase 2 [Source:UniProtKB/Swiss-Prot;Acc:Q06402]
-1.80722	3.58564e-57	AT5G43780	ATP sulfurylase 4, chloroplastic [Source:UniProtKB/Swiss-Prot;Acc:Q9S7D8]
-1.80705	5.47805e-38	AT1G16670	Cold-responsive protein kinase 1 [Source:UniProtKB/Swiss-Prot;Acc:Q93YN1]
-1.80692	1.7123e-26	AT5G53110	RING/U-box superfamily protein [Source:UniProtKB/TrEMBL;Acc:F4KJ04]
-1.80638	0.0347331	AT3G04640	At3g04640 [Source:UniProtKB/TrEMBL;Acc:Q9SR10]
-1.80511	1.95777e-09	AT5G64870	Flotillin-like protein 3 [Source:UniProtKB/Swiss-Prot;Acc:Q9LV90]
-1.80238	3.84729e-28	AT5G08760	unknown protein; FUNCTIONS IN: molecular_function unknown; INVOLVED IN: biological_process unknown; LOCATED IN: endomembrane system; Has 3 Blast hits to 3 proteins in 2 species: Archae - 0; Bacteria - 0; Metazoa - 0; Fungi - 0; Plants - 3; Viruses - /.../her Eukaryotes - 0 (source: NCBI BLink). [Source:TAIR;Acc:AT5G08760]
-1.80165	6.27191e-61	AT3G28480	Oxoglutarate/iron-dependent oxygenase [Source:UniProtKB/TrEMBL;Acc:F4J0A6]
-1.80023	2.24243e-05	AT1G72870	Disease resistance protein (TIR-NBS class) [Source:UniProtKB/TrEMBL;Acc:Q9SSN9]
-1.79996	2.59909e-24	AT1G62422	F2401.15 [Source:UniProtKB/TrEMBL;Acc:Q9MAV1]
-1.7978	2.21075e-51	AT3G54960	PDIL1-3 [Source:UniProtKB/TrEMBL;Acc:A0A178VF09]
-1.79369	9.14152e-23	AT3G15760	At3g15760 [Source:UniProtKB/TrEMBL;Acc:Q9LW03]
-1.7909	3.54117e-73	AT3G26600	Armadillo repeat only 4 [Source:UniProtKB/TrEMBL;Acc:Q38957]
-1.79036	0.00249944	AT2G29100	Glutamate receptor [Source:UniProtKB/TrEMBL;Acc:A0A178VR79]
-1.78958	8.79864e-05	AT5G39770	Restriction endonuclease, type II-like superfamily protein [Source:UniProtKB/TrEMBL;Acc:F4KFU8]
-1.78867	1.54536e-45	AT3G11820	SYR1 [Source:UniProtKB/TrEMBL;Acc:A0A178VIM4]
-1.78629	2.38526e-27	AT2G41835	Zinc finger AN1 and C2H2 domain-containing stress-associated protein 11 [Source:UniProtKB/Swiss-Prot;Acc:Q8VZ42]
-1.7856	2.40717e-52	AT3G17420	Probable receptor-like protein kinase At3g17420 [Source:UniProtKB/Swiss-Prot;Acc:Q9LRP3]
-1.78486	5.6949e-07	AT2G26390	Serpin-Z3 [Source:UniProtKB/Swiss-Prot;Acc:O48706]
-1.7845	7.79375e-09	AT1G72540	Putative receptor-like protein kinase At1g72540 [Source:UniProtKB/Swiss-Prot;Acc:Q9CAH1]
-1.78273	3.71428e-42	AT5G47220	ERF2 [Source:UniProtKB/TrEMBL;Acc:A0A178UCP3]
-1.78114	9.45611e-07	AT2G30670	Tropinone reductase homolog At2g30670 [Source:UniProtKB/Swiss-Prot;Acc:O49332]
-1.7809	5.51029e-41	AT4G23130	cysteine-rich RLK (RECEPTOR-like protein kinase) 5 [Source:TAIR;Acc:AT4G23130]
-1.78082	9.98636e-27	AT3G47090	Leucine-rich repeat protein kinase family protein [Source:UniProtKB/TrEMBL;Acc:Q9SD64]
-1.77907	3.63915e-25	AT4G01700	At4g01700 [Source:UniProtKB/TrEMBL;Acc:Q9ZSI6]
-1.77614	2.26431e-23	AT4G17500	Ethylene-responsive transcription factor 1A [Source:UniProtKB/Swiss-Prot;Acc:O80337]
-1.77611	3.80665e-46	AT2G32160	AT2G32160 protein [Source:UniProtKB/TrEMBL;Acc:B3H6T0]
-1.77322	1.31594e-62	AT4G37640	Calcium-transporting ATPase [Source:UniProtKB/TrEMBL;Acc:A0A178V2M5]
-1.77158	0.000175457	AT4G23280	Putative cysteine-rich receptor-like protein kinase 20 [Source:UniProtKB/Swiss-Prot;Acc:O65479]
-1.76985	4.47402e-34	AT5G53550	YSL3 [Source:UniProtKB/TrEMBL;Acc:A0A178U7D6]
-1.76977	4.81017e-06	AT5G18470	Curculin-like (Mannose-binding) lectin family protein [Source:UniProtKB/TrEMBL;Acc:Q94K76]
-1.76711	8.24255e-27	AT5G48570	Peptidyl-prolyl cis-trans isomerase FKBP65 [Source:UniProtKB/Swiss-Prot;Acc:Q9FJL3]
-1.76605	3.96611e-47	AT5G19240	Uncharacterized GPI-anchored protein At5g19240 [Source:UniProtKB/Swiss-Prot;Acc:Q84VZ5]
-1.76553	0.0415625	AT5G38310	Putative uncharacterized protein [Source:UniProtKB/TrEMBL;Acc:Q9FKN2]
-1.76356	7.07073e-50	AT4G35600	Protein kinase superfamily protein [Source:UniProtKB/TrEMBL;Acc:F4JN38]
-1.76332	6.40542e-67	AT1G59710	Actin cross-linking protein (DUF569) [Source:UniProtKB/TrEMBL;Acc:Q9LQ43]
-1.76142	3.4521e-16	AT1G72120	Protein NRT1/ PTR FAMILY 5.14 [Source:UniProtKB/Swiss-Prot;Acc:Q8VZE2]
-1.76099	3.53756e-06	AT1G79680	Wall-associated receptor kinase-like 10 [Source:UniProtKB/Swiss-Prot;Acc:Q8VYA3]
-1.76042	8.9015e-32	AT1G52770	At1g52770 [Source:UniProtKB/TrEMBL;Acc:Q9C941]
-1.75899	0.0296375	AT5G39110	Germin-like protein subfamily 1 member 14 [Source:UniProtKB/Swiss-Prot;Acc:Q9FID0]
-1.75756	6.42538e-22	AT1G16110	Wall-associated receptor kinase-like 6 [Source:UniProtKB/Swiss-Prot;Acc:Q8GXQ3]
-1.75608	3.4992e-33	AT1G07620	GTP-binding protein Obg/CgtA [Source:TAIR;Acc:AT1G07620]
-1.75599	2.25748e-15	AT1G67920	At1g67920 [Source:UniProtKB/TrEMBL;Acc:Q9C9V8]
-1.7552	3.7599e-08	AT4G23200	cysteine-rich RLK (RECEPTOR-like protein kinase) 12 [Source:TAIR;Acc:AT4G23200]
-1.75093	1.14662e-38	AT5G41740	Disease resistance protein (TIR-NBS-LRR class) family [Source:UniProtKB/TrEMBL;Acc:F4JYI4]
-1.75072	1.50469e-42	AT4G29520	Nucleophosmin [Source:UniProtKB/TrEMBL;Acc:Q9SU93]
-1.75037	2.41448e-11	AT1G19020	CDP-diacylglycerol-glycerol-3-phosphate 3-phosphatidyltransferase [Source:UniProtKB/TrEMBL;Acc:Q8VYY6]
-1.74973	2.37422e-42	AT2G38860	DJ-1 protein homolog E [Source:UniProtKB/Swiss-Prot;Acc:Q9ZV19]
-1.74933	7.1736e-21	AT3G13090	ABC transporter C family member 6 [Source:UniProtKB/Swiss-Prot;Acc:Q8VZZ4]
-1.74813	2.39249e-71	AT4G29810	MAP kinase kinase 2 [Source:TAIR;Acc:AT4G29810]
-1.74802	8.13649e-42	AT3G03470	Cytochrome P450 89A9 [Source:UniProtKB/Swiss-Prot;Acc:Q9SRQ1]
-1.74664	1.09109e-06	AT1G18940	F14D16.8 [Source:UniProtKB/TrEMBL;Acc:Q9LMD4]
-1.7458	8.14191e-22	AT1G61420	S-locus lectin protein kinase family protein [Source:TAIR;Acc:AT1G61420]
-1.74131	4.14141e-38	AT1G14370	PBL2 [Source:UniProtKB/TrEMBL;Acc:A0A178WI52]
-1.74126	0.000177227	AT5G61490	Transmembrane protein [Source:UniProtKB/TrEMBL;Acc:Q9FKH0]
-1.74072	1.36173e-36	AT3G10500	NAC domain-containing protein 53 [Source:UniProtKB/Swiss-Prot;Acc:Q949N0]
-1.74046	1.55796e-19	AT4G35070	At4g35070 [Source:UniProtKB/TrEMBL;Acc:Q66GR4]
-1.73997	3.5734e-44	AT4G28490	Receptor-like protein kinase 5 [Source:UniProtKB/Swiss-Prot;Acc:P47735]
-1.73964	1.22061e-18	AT3G53310	B3 domain-containing protein REM20 [Source:UniProtKB/Swiss-Prot;Acc:Q8LAV5]
-1.73605	2.58865e-54	AT2G25000	Probable WRKY transcription factor 60 [Source:UniProtKB/Swiss-Prot;Acc:Q9SK33]
-1.73584	6.79291e-28	AT4G02550	unknown protein; BEST Arabidopsis thaliana protein match is: unknown protein (TAIR:AT4G02210.2); Has 350 Blast hits to 284 proteins in 18 species: Archae - 0; Bacteria - 0; Metazoa - 0; Fungi - 13; Plants - 331; Viruses - 0; Other Eukaryotes - 6 (so /.../NCBI BLink). [Source:TAIR;Acc:AT4G02550]
-1.73259	0.00031589	AT3G28210	Zinc finger AN1 domain-containing stress-associated protein 12 [Source:UniProtKB/Swiss-Prot;Acc:Q67YE6]
-1.73237	3.79192e-70	AT1G65800	Receptor-like serine/threonine-protein kinase SD1-6 [Source:UniProtKB/Swiss-Prot;Acc:Q9S972]
-1.727	2.09603e-62	AT2G32800	Receptor like protein kinase S.2 [Source:UniProtKB/Swiss-Prot;Acc:O48837]
-1.72582	0.0087925	AT5G48410	Glutamate receptor 1.3 [Source:UniProtKB/Swiss-Prot;Acc:Q9FH75]
-1.72115	1.95388e-11	AT4G18430	Ras-related protein RABA1e [Source:UniProtKB/Swiss-Prot;Acc:O49513]
-1.71972	8.94193e-18	AT3G18690	Protein MKS1 [Source:UniProtKB/Swiss-Prot;Acc:Q8LGD5]
-1.71708	9.54758e-57	AT1G27770	Calcium-transporting ATPase [Source:UniProtKB/TrEMBL;Acc:A0A178WD16]
-1.71695	4.67549e-30	AT5G54860	Probable folate-biopterin transporter 4 [Source:UniProtKB/Swiss-Prot;Acc:Q8RWQ5]
-1.71672	6.31774e-42	AT2G37710	L-type lectin-domain containing receptor kinase IV.1 [Source:UniProtKB/Swiss-Prot;Acc:O80939]
-1.71635	8.7192e-19	AT2G24600	Ankyrin repeat family protein [Source:UniProtKB/TrEMBL;Acc:F4IPR3]
-1.71482	4.94755e-12	AT3G13437	Transmembrane protein [Source:UniProtKB/TrEMBL;Acc:A0A1I9LNG9]
-1.71466	1.4561e-18	AT5G39020	Probable receptor-like protein kinase At5g39020 [Source:UniProtKB/Swiss-Prot;Acc:Q9FID6]
-1.71425	1.87759e-09	AT1G23850	T23E23.1 [Source:UniProtKB/TrEMBL;Acc:Q9LRA9]
-1.71396	9.97607e-15	AT2G43140	Basic helix-loop-helix (BHLH) DNA-binding superfamily protein [Source:UniProtKB/TrEMBL;Acc:F4IQ66]
-1.71187	2.61886e-09	AT3G02800	Tyrosine-protein phosphatase DSP3 [Source:UniProtKB/Swiss-Prot;Acc:Q681Z2]
-1.71104	0.0366871	AT1G32928	Avr9/Cf-9 rapidly elicited protein [Source:UniProtKB/TrEMBL;Acc:Q56XA0]
-1.71011	3.57428e-26	AT3G20600	Protein NDR1 [Source:UniProtKB/Swiss-Prot;Acc:O48915]
-1.70782	0.00826052	AT5G24910	Cytochrome P450 714A1 [Source:UniProtKB/Swiss-Prot;Acc:Q93Z79]
-1.70776	3.11057e-42	AT5G01850	Protein kinase superfamily protein [Source:TAIR;Acc:AT5G01850]
-1.70571	0.00337929	AT3G07600	Heavy metal-associated isoprenylated plant protein 16 [Source:UniProtKB/Swiss-Prot;Acc:Q9SSF0]
-1.70498	3.06095e-28	AT4G02520	Glutathione S-transferase F2 [Source:UniProtKB/Swiss-Prot;Acc:P46422]
-1.70438	6.38587e-77	AT3G13080	MRP3 [Source:UniProtKB/TrEMBL;Acc:A0A178VHA7]
-1.7028	0.010055	AT4G19720	Glycosyl hydrolase family protein with chitinase insertion domain [Source:TAIR;Acc:AT4G19720]
-1.70233	3.86633e-21	AT1G53920	GLIP5 [Source:UniProtKB/TrEMBL;Acc:A0A178WKF5]
-1.69842	4.9126e-51	AT4G23470	PLAC8 family protein [Source:UniProtKB/TrEMBL;Acc:Q8W458]
-1.69726	0.000888092	AT5G39150	Germin-like protein subfamily 1 member 17 [Source:UniProtKB/Swiss-Prot;Acc:Q9FIC6]
-1.69722	1.01476e-40	AT1G14200	At1g14200 [Source:UniProtKB/TrEMBL;Acc:Q9XI67]
-1.69294	7.35527e-14	AT5G61430	NAC domain-containing protein 100 [Source:UniProtKB/Swiss-Prot;Acc:Q9FLJ2]
-1.69275	3.60517e-41	AT5G39450	F-box protein At5g39450 [Source:UniProtKB/Swiss-Prot;Acc:Q8RWD6]
-1.69271	1.56078e-31	AT5G18600	Monothiol glutaredoxin-S2 [Source:UniProtKB/Swiss-Prot;Acc:Q8L8Z8]
-1.69124	1.94086e-25	AT5G02502	Dolichyl-diphosphooligosaccharide--protein glycosyltransferase subunit 4B [Source:UniProtKB/Swiss-Prot;Acc:Q8L986]
-1.69023	8.42866e-08	AT1G72950	Disease resistance protein (TIR-NBS class) [Source:UniProtKB/TrEMBL;Acc:Q9SSN1]
-1.69013	9.68143e-35	AT3G51450	Protein STRICTOSIDINE SYNTHASE-LIKE 7 [Source:UniProtKB/Swiss-Prot;Acc:Q9SD04]
-1.69004	3.11719e-39	AT1G14790	RNA-dependent RNA polymerase [Source:UniProtKB/TrEMBL;Acc:A0A178WKG4]
-1.68918	4.18297e-37	AT1G13990	unknown protein; FUNCTIONS IN: molecular_function unknown; INVOLVED IN: biological_process unknown; LOCATED IN: chloroplast; EXPRESSED IN: 23 plant structures; EXPRESSED DURING: 13 growth stages; CONTAINS InterPro DOMAIN/s: Protein of unknown functi /.../3110 (InterPro:IPR021503); Has 25 Blast hits to 25 proteins in 8 species: Archae - 0; Bacteria - 0; Metazoa - 0; Fungi - 0; Plants - 25; Viruses…
-1.68745	6.8736e-55	AT5G49570	Transglutaminase [Source:UniProtKB/TrEMBL;Acc:A5PHD1]
-1.68641	3.23057e-07	AT4G13572	unknown protein; FUNCTIONS IN: molecular_function unknown; INVOLVED IN: biological_process unknown; LOCATED IN: cellular_component unknown; Has 0 Blast hits to 0 proteins in 0 species (source: NCBI BLink). [Source:TAIR;Acc:AT4G13572]
-1.68518	7.9922e-21	AT5G63990	Probable SAL3 phosphatase [Source:UniProtKB/Swiss-Prot;Acc:Q8GY63]
-1.68475	1.72394e-11	AT1G52800	2-oxoglutarate (2OG) and Fe(II)-dependent oxygenase superfamily protein [Source:UniProtKB/TrEMBL;Acc:Q9C938]
-1.68265	1.13683e-40	AT2G30250	Probable WRKY transcription factor 25 [Source:UniProtKB/Swiss-Prot;Acc:O22921]
-1.6774	5.70089e-58	AT4G24190	Endoplasmin homolog [Source:UniProtKB/Swiss-Prot;Acc:Q9STX5]
-1.6759	4.50732e-26	AT3G51340	Eukaryotic aspartyl protease family protein [Source:UniProtKB/TrEMBL;Acc:F4J3B9]
-1.67577	4.49157e-45	AT1G31580	CXc750 protein [Source:UniProtKB/TrEMBL;Acc:Q39066]
-1.67528	9.4848e-29	AT3G11580	AP2/B3-like transcriptional factor family protein [Source:UniProtKB/TrEMBL;Acc:A0A1I9LT60]
-1.67306	6.33404e-21	AT5G47070	Probable serine/threonine-protein kinase PBL19 [Source:UniProtKB/Swiss-Prot;Acc:Q9LTC0]
-1.67217	5.30911e-64	AT3G17700	Probable cyclic nucleotide-gated ion channel 20, chloroplastic [Source:UniProtKB/Swiss-Prot;Acc:Q9LD37]
-1.67007	5.75746e-41	AT2G38290	Ammonium transporter 2 [Source:UniProtKB/Swiss-Prot;Acc:Q9M6N7]
-1.66717	2.88036e-11	AT3G47580	Leucine-rich repeat protein kinase family protein [Source:UniProtKB/TrEMBL;Acc:Q9SN80]
-1.66695	0.0265207	AT5G67620	At5g67620 [Source:UniProtKB/TrEMBL;Acc:Q9FJW1]
-1.66285	4.30264e-35	AT4G34150	AT4g34150/F28A23_90 [Source:UniProtKB/TrEMBL;Acc:Q945K9]
-1.66269	7.37446e-09	AT5G08790	Protein ATAF2 [Source:UniProtKB/Swiss-Prot;Acc:Q9C598]
-1.65852	2.28935e-09	AT5G20480	LRR receptor-like serine/threonine-protein kinase EFR [Source:UniProtKB/Swiss-Prot;Acc:C0LGT6]
-1.65768	2.04415e-44	AT2G36670	Eukaryotic aspartyl protease family protein [Source:UniProtKB/TrEMBL;Acc:F4INZ4]
-1.65711	2.06011e-24	AT3G25870	unknown protein; BEST Arabidopsis thaliana protein match is: unknown protein (TAIR:AT1G13360.1); Has 50 Blast hits to 50 proteins in 12 species: Archae - 0; Bacteria - 0; Metazoa - 0; Fungi - 0; Plants - 50; Viruses - 0; Other Eukaryotes - 0 (source /.../ BLink). [Source:TAIR;Acc:AT3G25870]
-1.65592	2.30521e-45	AT2G46440	Cyclic nucleotide-gated ion channel 11 [Source:UniProtKB/Swiss-Prot;Acc:Q9SKD6]
-1.65411	7.9435e-34	AT2G28940	At2g28940 [Source:UniProtKB/TrEMBL;Acc:O81064]
-1.65344	4.79236e-63	AT5G42050	DCD (Development and Cell Death) domain protein [Source:UniProtKB/TrEMBL;Acc:Q8RXN8]
-1.65192	1.54613e-62	AT3G62600	DnaJ protein ERDJ3B [Source:UniProtKB/Swiss-Prot;Acc:Q9LZK5]
-1.6517	5.30062e-07	AT4G26470	Calcium-binding EF-hand family protein [Source:TAIR;Acc:AT4G26470]
-1.65096	1.5768e-13	AT2G16060	Non-symbiotic hemoglobin 1 [Source:UniProtKB/Swiss-Prot;Acc:O24520]
-1.65091	1.04543e-35	AT1G14360	UDP-galactose/UDP-glucose transporter 3 [Source:UniProtKB/Swiss-Prot;Acc:Q9M9S6]
-1.64788	9.74127e-30	AT2G38470	WRKY33 [Source:UniProtKB/TrEMBL;Acc:A0A178VLS4]
-1.64713	1.18358e-70	AT4G34390	XLG2 [Source:UniProtKB/TrEMBL;Acc:A0A178V358]
-1.64648	3.61313e-41	AT1G77810	Hexosyltransferase [Source:UniProtKB/TrEMBL;Acc:A0A178WEM8]
-1.64408	6.02737e-22	AT4G11300	At4g11300 [Source:UniProtKB/TrEMBL;Acc:Q9SUT1]
-1.64385	0.01722	AT1G30100	Probable 9-cis-epoxycarotenoid dioxygenase NCED5, chloroplastic [Source:UniProtKB/Swiss-Prot;Acc:Q9C6Z1]
-1.64118	1.04647e-06	AT3G13782	NFA4 [Source:UniProtKB/TrEMBL;Acc:A0A178VHH5]
-1.64067	0.000503655	AT1G14080	Fucosyltransferase 6 [Source:UniProtKB/Swiss-Prot;Acc:Q9XI80]
-1.63791	1.25007e-39	AT2G01540	Protein C2-DOMAIN ABA-RELATED 10 [Source:UniProtKB/Swiss-Prot;Acc:Q9ZVF1]
-1.63678	6.01567e-13	AT2G18000	Transcription initiation factor TFIID subunit 14 [Source:UniProtKB/Swiss-Prot;Acc:F4IPK2]
-1.63604	0.0177867	AT1G49700	Plant protein 1589 of unknown function [Source:TAIR;Acc:AT1G49700]
-1.63504	3.68477e-20	AT3G55690	At3g55690 [Source:UniProtKB/TrEMBL;Acc:Q9M053]
-1.63376	1.99034e-60	AT2G40600	Appr-1-p processing enzyme family protein [Source:UniProtKB/TrEMBL;Acc:Q8H114]
-1.63248	8.58492e-39	AT4G27740	Protein yippee-like [Source:UniProtKB/TrEMBL;Acc:A0A178UUJ4]
-1.63246	2.34599e-34	AT4G08950	Protein EXORDIUM [Source:UniProtKB/Swiss-Prot;Acc:Q9ZPE7]
-1.63169	1.67046e-39	AT3G11090	LBD21 [Source:UniProtKB/TrEMBL;Acc:A0A178V6L2]
-1.63153	2.87939e-28	AT3G07720	AT3g07720/F17A17_6 [Source:UniProtKB/TrEMBL;Acc:Q9S7W4]
-1.62967	1.07248e-39	AT4G11850	Phospholipase D gamma 1 [Source:UniProtKB/Swiss-Prot;Acc:Q9T053]
-1.62963	4.43523e-20	AT5G07820	Plant calmodulin-binding protein-like protein [Source:UniProtKB/TrEMBL;Acc:Q9SDA2]
-1.62864	6.7917e-24	AT2G05320	Alpha-1,6-mannosyl-glycoprotein 2-beta-N-acetylglucosaminyltransferase [Source:UniProtKB/Swiss-Prot;Acc:Q9FT88]
-1.62752	4.03429e-25	AT3G55950	Putative serine/threonine-protein kinase-like protein CCR3 [Source:UniProtKB/Swiss-Prot;Acc:Q9LY50]
-1.62725	3.02581e-09	AT1G65484	unknown protein; FUNCTIONS IN: molecular_function unknown; INVOLVED IN: biological_process unknown; LOCATED IN: endomembrane system; Has 30201 Blast hits to 17322 proteins in 780 species: Archae - 12; Bacteria - 1396; Metazoa - 17338; Fungi - 3422; /.../ - 5037; Viruses - 0; Other Eukaryotes - 2996 (source: NCBI BLink). [Source:TAIR;Acc:AT1G65484]
-1.62216	5.18152e-08	AT3G10020	AT3g10020/T22K18_16 [Source:UniProtKB/TrEMBL;Acc:Q9SR67]
-1.61921	1.90423e-41	AT1G31540	Disease resistance protein (TIR-NBS-LRR class) family [Source:UniProtKB/TrEMBL;Acc:F4I9F1]
-1.61743	1.11514e-33	AT5G37600	Glutamine synthetase cytosolic isozyme 1-1 [Source:UniProtKB/Swiss-Prot;Acc:Q56WN1]
-1.6172	0.0132883	AT1G22980	unknown protein; BEST Arabidopsis thaliana protein match is: unknown protein (TAIR:AT1G22970.1); Has 52 Blast hits to 50 proteins in 17 species: Archae - 0; Bacteria - 0; Metazoa - 8; Fungi - 0; Plants - 44; Viruses - 0; Other Eukaryotes - 0 (source /.../ BLink). [Source:TAIR;Acc:AT1G22980]
-1.61435	0.00273422	AT4G13800	Probable magnesium transporter NIPA2 [Source:UniProtKB/Swiss-Prot;Acc:B3LFA3]
-1.6137	3.32497e-41	AT4G24970	Protein MICRORCHIDIA 7 [Source:UniProtKB/Swiss-Prot;Acc:F4JRS4]
-1.61335	3.53805e-31	AT1G78550	2-oxoglutarate (2OG) and Fe(II)-dependent oxygenase superfamily protein [Source:UniProtKB/TrEMBL;Acc:Q9SYM7]
-1.61257	7.90834e-05	AT5G46350	Probable WRKY transcription factor 8 [Source:UniProtKB/Swiss-Prot;Acc:Q9FL26]
-1.61218	0.0312389	AT1G59865	unknown protein; Has 35333 Blast hits to 34131 proteins in 2444 species: Archae - 798; Bacteria - 22429; Metazoa - 974; Fungi - 991; Plants - 531; Viruses - 0; Other Eukaryotes - 9610 (source: NCBI BLink). [Source:TAIR;Acc:AT1G59865]
-1.61143	0.0463132	AT4G37290	unknown protein; FUNCTIONS IN: molecular_function unknown; INVOLVED IN: response to karrikin; LOCATED IN: endomembrane system; EXPRESSED IN: cotyledon, hypocotyl, leaf; EXPRESSED DURING: LP.04 four leaves visible; BEST Arabidopsis thaliana protein m /.../s: unknown protein (TAIR:AT2G23270.1); Has 30201 Blast hits to 17322 proteins in 780 species: Archae - 12; Bacteria - 1396; Metazoa - 17338; Fun…
-1.60941	5.95674e-28	AT3G47780	ABC transporter A family member 7 [Source:UniProtKB/Swiss-Prot;Acc:Q9STT5]
-1.6072	0.000396321	AT1G67860	At1g67860/T23K23_29 [Source:UniProtKB/TrEMBL;Acc:Q9C9V2]
-1.60634	2.29539e-32	AT1G72940	At1g72940/F3N23_14 [Source:UniProtKB/TrEMBL;Acc:Q9SSN2]
-1.60619	4.01026e-38	AT3G14130	Peroxisomal (S)-2-hydroxy-acid oxidase GLO4 [Source:UniProtKB/Swiss-Prot;Acc:Q9LJH5]
-1.60075	2.10583e-09	AT3G51350	Eukaryotic aspartyl protease family protein [Source:UniProtKB/TrEMBL;Acc:F4J3C0]
-1.60069	1.21408e-05	AT4G16750	Ethylene-responsive transcription factor ERF039 [Source:UniProtKB/Swiss-Prot;Acc:Q9SUK8]
-1.59234	0.000804625	AT2G15400	DNA-directed RNA polymerase II, third largest subunit [Source:UniProtKB/TrEMBL;Acc:Q0WRA4]
-1.59019	3.62461e-54	AT1G52290	Proline-rich receptor-like protein kinase PERK15 [Source:UniProtKB/Swiss-Prot;Acc:Q9C821]
-1.58989	0.000284827	AT4G22070	Probable WRKY transcription factor 31 [Source:UniProtKB/Swiss-Prot;Acc:Q93WT0]
-1.58864	4.95829e-32	AT3G44720	Arogenate dehydratase 4, chloroplastic [Source:UniProtKB/Swiss-Prot;Acc:O22241]
-1.5865	5.74104e-40	AT5G10650	At5g10650 [Source:UniProtKB/TrEMBL;Acc:Q5XEP8]
-1.58496	9.74657e-05	AT5G49120	DUF581 family protein, putative (DUF581) [Source:UniProtKB/TrEMBL;Acc:Q9FH22]
-1.57988	1.96217e-11	AT5G38280	PR5-like receptor kinase [Source:TAIR;Acc:AT5G38280]
-1.57858	9.24376e-07	AT4G17490	Ethylene-responsive transcription factor 6 [Source:UniProtKB/Swiss-Prot;Acc:Q8VZ91]
-1.57812	4.18518e-27	AT1G72280	Like disulfide bond formation protein [Source:UniProtKB/TrEMBL;Acc:Q0WSW0]
-1.57568	7.5126e-15	AT1G14480	Ankyrin repeat family protein [Source:UniProtKB/TrEMBL;Acc:Q9M9R5]
-1.57511	0.0170182	AT5G43620	Polyadenylation and cleavage factor homolog 5 [Source:UniProtKB/Swiss-Prot;Acc:Q9FIX8]
-1.57228	6.58583e-20	AT5G59330	Bifunctional inhibitor/lipid-transfer protein/seed storage 2S albumin superfamily protein [Source:UniProtKB/TrEMBL;Acc:Q1PDH3]
-1.57211	1.93208e-45	AT4G08470	Mitogen-activated protein kinase kinase kinase 3 [Source:UniProtKB/Swiss-Prot;Acc:Q9M0T3]
-1.57181	2.52202e-32	AT4G38260	Protein of unknown function (DUF833) [Source:TAIR;Acc:AT4G38260]
-1.57154	0.000561783	AT3G53235	unknown protein; Has 9 Blast hits to 9 proteins in 4 species: Archae - 0; Bacteria - 0; Metazoa - 0; Fungi - 0; Plants - 9; Viruses - 0; Other Eukaryotes - 0 (source: NCBI BLink). [Source:TAIR;Acc:AT3G53235]
-1.57064	2.26387e-32	AT1G69730	Wall-associated receptor kinase-like 9 [Source:UniProtKB/Swiss-Prot;Acc:Q9C9L5]
-1.57022	3.14129e-27	AT5G15870	Glycosyl hydrolase family 81 protein [Source:UniProtKB/TrEMBL;Acc:Q9LFT3]
-1.56806	0.00245318	AT3G55980	Salt-inducible zinc finger 1 [Source:UniProtKB/TrEMBL;Acc:A0A1I9LNJ4]
-1.56387	8.43661e-28	AT1G12420	ACT domain-containing protein ACR8 [Source:UniProtKB/Swiss-Prot;Acc:Q9LNA5]
-1.56154	1.69715e-36	AT3G57330	Putative calcium-transporting ATPase 11, plasma membrane-type [Source:UniProtKB/Swiss-Prot;Acc:Q9M2L4]
-1.56058	8.59389e-72	AT5G47120	Bax inhibitor 1 [Source:UniProtKB/Swiss-Prot;Acc:Q9LD45]
-1.55922	1.62452e-13	AT3G22930	Calmodulin-like protein 11 [Source:UniProtKB/Swiss-Prot;Acc:Q9LIK5]
-1.55897	4.98201e-17	AT3G14460	Putative disease resistance protein At3g14460 [Source:UniProtKB/Swiss-Prot;Acc:Q9LRR5]
-1.55887	1.03751e-44	AT1G51660	MKK4 [Source:UniProtKB/TrEMBL;Acc:A0A178WCC0]
-1.55866	2.35168e-41	AT4G28400	Probable protein phosphatase 2C 58 [Source:UniProtKB/Swiss-Prot;Acc:Q93YW5]
-1.55644	1.27575e-39	AT5G23850	At5g23850 [Source:UniProtKB/TrEMBL;Acc:Q9FF95]
-1.55536	1.30034e-25	AT2G15390	Probable fucosyltransferase 4 [Source:UniProtKB/Swiss-Prot;Acc:Q9SJP2]
-1.55508	1.63075e-25	AT4G25800	Calmodulin-binding protein 60 D [Source:UniProtKB/Swiss-Prot;Acc:Q0WVV6]
-1.55348	4.17138e-47	AT3G25610	Phospholipid-transporting ATPase 10 [Source:UniProtKB/Swiss-Prot;Acc:Q9LI83]
-1.55273	4.55395e-22	AT4G22530	S-adenosyl-L-methionine-dependent methyltransferases superfamily protein [Source:UniProtKB/TrEMBL;Acc:Q9SUW6]
-1.55266	1.03536e-11	AT1G56150	Auxin-responsive protein SAUR71 [Source:UniProtKB/Swiss-Prot;Acc:Q9SGU2]
-1.55131	5.73509e-37	AT5G47140	GATA transcription factor 27 [Source:UniProtKB/Swiss-Prot;Acc:Q5PP38]
-1.54701	0.0259834	AT5G57560	Xyloglucan endotransglucosylase/hydrolase [Source:UniProtKB/TrEMBL;Acc:A0A178UQX4]
-1.54649	0.0219645	AT3G50200	Uncharacterized protein F11C1_40 [Source:UniProtKB/TrEMBL;Acc:Q9SNE7]
-1.54496	4.75088e-47	AT3G02770	Putative 4-hydroxy-4-methyl-2-oxoglutarate aldolase 1 [Source:UniProtKB/Swiss-Prot;Acc:Q9M8R9]
-1.54272	4.74369e-07	AT5G42530	Uncharacterized protein At5g42530 [Source:UniProtKB/TrEMBL;Acc:Q8W483]
-1.54253	0.0111964	AT1G79780	CASP-like protein 3A2 [Source:UniProtKB/Swiss-Prot;Acc:Q1PFB8]
-1.54234	4.81521e-40	AT2G31870	Poly(ADP-ribose) glycohydrolase 1 [Source:UniProtKB/Swiss-Prot;Acc:Q9SKB3]
-1.54118	4.18117e-32	AT2G26560	Patatin-like protein 2 [Source:UniProtKB/Swiss-Prot;Acc:O48723]
-1.54108	9.9238e-06	AT1G02920	Glutathione S-transferase F7 [Source:UniProtKB/Swiss-Prot;Acc:Q9SRY5]
-1.53987	0.0030494	AT3G48180	At3g48180 [Source:UniProtKB/TrEMBL;Acc:Q9STS0]
-1.53766	0.0477755	AT1G71200	basic helix-loop-helix (bHLH) DNA-binding superfamily protein [Source:TAIR;Acc:AT1G71200]
-1.53647	4.04095e-24	AT5G39785	Protein of unknown function (DUF1666) [Source:TAIR;Acc:AT5G39785]
-1.53488	9.51187e-05	AT5G18220	Beta-1,3-glucanase-like protein [Source:UniProtKB/TrEMBL;Acc:Q9FK49]
-1.53372	2.08128e-14	AT3G26230	Cytochrome P450 71B24 [Source:UniProtKB/Swiss-Prot;Acc:Q9LTL8]
-1.53368	3.20736e-31	AT2G42950	At2g42950 [Source:UniProtKB/TrEMBL;Acc:Q8GY73]
-1.52654	0.00338605	AT5G60780	High affinity nitrate transporter 2.3 [Source:UniProtKB/Swiss-Prot;Acc:Q9FJH7]
-1.52628	3.11462e-42	AT2G43850	Integrin-linked protein kinase 1 [Source:UniProtKB/Swiss-Prot;Acc:F4IS56]
-1.52607	3.72565e-08	AT4G36110	SAUR9 [Source:UniProtKB/TrEMBL;Acc:A0A178V0P2]
-1.52501	4.60573e-18	AT3G51750	Uncharacterized protein At3g51750 [Source:UniProtKB/TrEMBL;Acc:Q9SCT3]
-1.52356	0.0333441	AT3G01015	TPX2 (Targeting protein for Xklp2) protein family [Source:UniProtKB/TrEMBL;Acc:Q5XVC4]
-1.52344	2.68031e-35	AT5G56250	Hapless 8 [Source:UniProtKB/TrEMBL;Acc:Q9FH14]
-1.52214	2.68132e-22	AT4G27470	RMA3 [Source:UniProtKB/TrEMBL;Acc:A0A178V4H3]
-1.52179	1.07764e-17	AT1G61260	Protein of unknown function (DUF761) [Source:TAIR;Acc:AT1G61260]
-1.52158	1.11453e-31	AT2G46270	G-box-binding factor 3 [Source:UniProtKB/Swiss-Prot;Acc:P42776]
-1.52116	9.38919e-57	AT5G57035	U-box domain-containing protein kinase family protein [Source:UniProtKB/TrEMBL;Acc:F4K964]
-1.52064	8.97264e-10	AT4G23210	Cysteine-rich receptor-like protein kinase 13 [Source:UniProtKB/Swiss-Prot;Acc:Q0PW40]
-1.52015	0.000119811	AT1G76650	CML38 [Source:UniProtKB/TrEMBL;Acc:A0A178WMC5]
-1.51921	1.09972e-49	AT2G33530	Serine carboxypeptidase-like 46 [Source:UniProtKB/Swiss-Prot;Acc:Q8VY01]
-1.51847	0.000505466	AT3G54160	RNI-like superfamily protein [Source:UniProtKB/TrEMBL;Acc:Q9M388]
-1.51477	1.10072e-31	AT4G25940	Putative clathrin assembly protein At4g25940 [Source:UniProtKB/Swiss-Prot;Acc:Q8VYT2]
-1.51444	5.75746e-41	AT4G36090	At4g36090 [Source:UniProtKB/TrEMBL;Acc:Q5RJC7]
-1.51368	1.93481e-06	AT3G60580	Zinc finger protein ZAT9 [Source:UniProtKB/Swiss-Prot;Acc:Q9M202]
-1.51132	7.6446e-38	AT1G12990	Beta-1,4-N-acetylglucosaminyltransferase family protein [Source:UniProtKB/TrEMBL;Acc:F4HP06]
-1.50896	1.31951e-12	AT5G40690	At5g40690 [Source:UniProtKB/TrEMBL;Acc:Q9FM29]
-1.50813	3.53899e-18	AT1G33610	Leucine-rich repeat (LRR) family protein [Source:UniProtKB/TrEMBL;Acc:F4HR91]
-1.50766	0.0304101	AT1G25400	At1g25400 [Source:UniProtKB/TrEMBL;Acc:Q9C6L0]
-1.50731	3.4749e-48	AT5G61210	SNP33 [Source:UniProtKB/TrEMBL;Acc:A0A178UGR9]
-1.50616	1.76618e-27	AT5G63030	Glutaredoxin-C1 [Source:UniProtKB/Swiss-Prot;Acc:Q8L8T2]
-1.50523	0.000365648	AT1G17240	receptor like protein 2 [Source:TAIR;Acc:AT1G17240]
-1.50443	3.05817e-16	AT4G24040	Trehalase [Source:UniProtKB/Swiss-Prot;Acc:Q9SU50]
-1.50407	1.70273e-20	AT1G33260	Probable receptor-like protein kinase At1g33260 [Source:UniProtKB/Swiss-Prot;Acc:P0DKI6]
-1.50396	0.000588735	AT1G05340	Cysteine-rich TM module stress tolerance protein [Source:UniProtKB/TrEMBL;Acc:O23035]
-1.50369	1.42278e-43	AT2G39270	Probable adenylate kinase 6, chloroplastic [Source:UniProtKB/Swiss-Prot;Acc:Q84JF7]
-1.5025	0.00920463	AT4G13570	Histone H2A [Source:UniProtKB/TrEMBL;Acc:F4JT33]
-1.5025	0.0156729	AT1G50400	Probable mitochondrial import receptor subunit TOM40-2 [Source:UniProtKB/Swiss-Prot;Acc:Q9SX55]
-1.50164	2.23534e-19	AT1G03730	At1g03730 [Source:UniProtKB/TrEMBL;Acc:Q1ECK0]
-1.50069	0.0137122	AT1G63245	CLE14 [Source:UniProtKB/TrEMBL;Acc:A0A178WFK0]
-1.49997	7.81257e-55	AT5G49760	At5g49760 [Source:UniProtKB/TrEMBL;Acc:Q8GZ99]
-1.49738	1.28222e-33	AT2G46620	AAA-ATPase At2g46620 [Source:UniProtKB/Swiss-Prot;Acc:F4IJ77]
-1.49736	1.56705e-06	AT1G22220	AUF2 [Source:UniProtKB/TrEMBL;Acc:A0A178W7K5]
-1.49681	3.58699e-61	AT3G13330	PA200 [Source:UniProtKB/TrEMBL;Acc:A0A178VC52]
-1.49397	9.09109e-55	AT5G42020	Heat shock protein 70 (Hsp 70) family protein [Source:TAIR;Acc:AT5G42020]
-1.49366	3.60667e-16	AT3G07580	At3g07580 [Source:UniProtKB/TrEMBL;Acc:Q6NME2]
-1.49159	1.42268e-29	AT3G55470	At3g55470 [Source:UniProtKB/TrEMBL;Acc:Q9M2T2]
-1.4893	2.78107e-20	AT3G48100	Response reactor 2 [Source:UniProtKB/TrEMBL;Acc:Q0WW39]
-1.48654	0.000993957	AT1G25560	AP2/ERF and B3 domain-containing transcription repressor TEM1 [Source:UniProtKB/Swiss-Prot;Acc:Q9C6M5]
-1.48587	3.50784e-07	AT1G10417	Encodes protein with unknown function whose expression is repressed by inoculation with Agrobacterium tumerifaciens. [Source:TAIR;Acc:AT1G10417]
-1.48543	0.000700772	AT5G56050	Late embryogenesis abundant (LEA) hydroxyproline-rich glycoprotein family protein [Source:UniProtKB/TrEMBL;Acc:Q9FKU2]
-1.48247	2.68364e-14	AT4G23880	At4g23880 [Source:UniProtKB/TrEMBL;Acc:Q9T0A3]
-1.47941	1.17691e-38	AT1G05630	Endonuclease/exonuclease/phosphatase family protein [Source:TAIR;Acc:AT1G05630]
-1.47877	1.93339e-23	AT3G13910	Protein of unknown function (DUF3511) [Source:TAIR;Acc:AT3G13910]
-1.47874	1.88055e-23	AT3G20510	Protein FATTY ACID EXPORT 6 [Source:UniProtKB/Swiss-Prot;Acc:Q9LJU6]
-1.47861	7.44158e-22	AT2G48030	At2g48030 [Source:UniProtKB/TrEMBL;Acc:Q9ZU86]
-1.47739	5.81357e-24	AT1G15670	F-box/kelch-repeat protein At1g15670 [Source:UniProtKB/Swiss-Prot;Acc:Q9LMR5]
-1.47704	5.72619e-47	AT1G61140	SNF2 domain-containing protein / helicase domain-containing protein / zinc finger protein-like protein [Source:UniProtKB/TrEMBL;Acc:F4HTG1]
-1.47591	2.69324e-28	AT2G34655	At2g34655 [Source:UniProtKB/TrEMBL;Acc:Q94BZ4]
-1.47352	7.09437e-47	AT3G44480	Disease resistance protein (TIR-NBS-LRR class) family [Source:UniProtKB/TrEMBL;Acc:A0A1I9LP82]
-1.47304	1.04797e-20	AT2G45510	At2g45510 [Source:UniProtKB/TrEMBL;Acc:O64631]
-1.47236	4.62575e-21	AT4G26810	At4g26810 [Source:UniProtKB/TrEMBL;Acc:Q9SZ21]
-1.46948	0.000238759	AT3G02610	Plant stearoyl-acyl-carrier desaturase family protein [Source:UniProtKB/TrEMBL;Acc:A0A178V7P2]
-1.46845	4.55133e-49	AT1G61250	Secretory carrier-associated membrane protein 3 [Source:UniProtKB/Swiss-Prot;Acc:Q9M5P2]
-1.46838	1.24478e-53	AT1G48210	Protein kinase superfamily protein [Source:UniProtKB/TrEMBL;Acc:F4HWU0]
-1.46812	1.34578e-33	AT1G55910	Zinc transporter 11 [Source:UniProtKB/Swiss-Prot;Acc:Q94EG9]
-1.46754	5.30739e-49	AT2G40950	bZIP transcription factor 17 [Source:UniProtKB/Swiss-Prot;Acc:O22208]
-1.46742	1.34235e-38	AT2G28890	Probable protein phosphatase 2C 23 [Source:UniProtKB/Swiss-Prot;Acc:Q9ZV25]
-1.46708	1.76742e-25	AT1G68585	At1g68585 [Source:UniProtKB/TrEMBL;Acc:Q8LGG7]
-1.46585	3.71381e-22	AT1G61490	G-type lectin S-receptor-like serine/threonine-protein kinase At1g61490 [Source:UniProtKB/Swiss-Prot;Acc:O64770]
-1.46365	0.0278381	AT1G43310	Nucleotide-sugar transporter family protein [Source:UniProtKB/TrEMBL;Acc:F4IB52]
-1.46337	2.2194e-43	AT1G21750	Protein disulfide isomerase-like 1-1 [Source:UniProtKB/Swiss-Prot;Acc:Q9XI01]
-1.46166	5.04988e-23	AT4G26990	AT4g26990/F10M23_330 [Source:UniProtKB/TrEMBL;Acc:Q8RY61]
-1.46119	2.15918e-44	AT1G64280	Regulatory protein NPR1 [Source:UniProtKB/Swiss-Prot;Acc:P93002]
-1.46111	1.42681e-08	AT2G06185	-
-1.45704	0.0451883	AT5G06730	Peroxidase 54 [Source:UniProtKB/Swiss-Prot;Acc:Q9FG34]
-1.45592	1.06568e-42	AT1G66980	suppressor of npr1-1 constitutive 4 [Source:TAIR;Acc:AT1G66980]
-1.45386	3.04182e-40	AT5G27830	FUNCTIONS IN: molecular_function unknown; INVOLVED IN: response to oxidative stress; LOCATED IN: endomembrane system; EXPRESSED IN: 22 plant structures; EXPRESSED DURING: 13 growth stages; CONTAINS InterPro DOMAIN/s: Folate receptor, conserved regio /.../erPro:IPR018143); Has 1807 Blast hits to 1807 proteins in 277 species: Archae - 0; Bacteria - 0; Metazoa - 736; Fungi - 347; Plants - 385; Virus…
-1.45206	1.87944e-25	AT3G53780	RHOMBOID-like protein 4 [Source:UniProtKB/Swiss-Prot;Acc:F4JBM4]
-1.45097	4.07671e-42	AT3G19010	2-oxoglutarate (2OG) and Fe(II)-dependent oxygenase superfamily protein [Source:UniProtKB/TrEMBL;Acc:Q9LJ65]
-1.44951	6.67792e-30	AT1G13210	Probable phospholipid-transporting ATPase 11 [Source:UniProtKB/Swiss-Prot;Acc:Q9SAF5]
-1.44901	9.02777e-46	AT4G09570	Calcium-dependent protein kinase 4 [Source:UniProtKB/Swiss-Prot;Acc:Q38869]
-1.44787	8.91909e-23	AT3G60160	ABC transporter C family member 9 [Source:UniProtKB/Swiss-Prot;Acc:Q9M1C7]
-1.4475	2.1047e-38	AT4G29950	Ypt/Rab-GAP domain of gyp1p superfamily protein [Source:UniProtKB/TrEMBL;Acc:Q9SZR5]
-1.4474	6.52468e-14	AT5G42860	Emb [Source:UniProtKB/TrEMBL;Acc:Q9FMN3]
-1.44668	0.00956987	AT3G13900	Probable phospholipid-transporting ATPase 7 [Source:UniProtKB/Swiss-Prot;Acc:Q9LVK9]
-1.4455	3.68409e-32	AT1G21370	unknown protein; CONTAINS InterPro DOMAIN/s: Protein of unknown function DUF218 (InterPro:IPR003848); Has 160 Blast hits to 160 proteins in 86 species: Archae - 0; Bacteria - 0; Metazoa - 0; Fungi - 102; Plants - 44; Viruses - 0; Other Eukaryotes - /.../urce: NCBI BLink). [Source:TAIR;Acc:AT1G21370]
-1.44449	4.47017e-38	AT4G17830	Peptidase M20/M25/M40 family protein [Source:UniProtKB/TrEMBL;Acc:F4JPZ7]
-1.44396	2.04521e-21	AT3G55880	SUE4 [Source:UniProtKB/TrEMBL;Acc:A0A178VE92]
-1.44388	3.21149e-55	AT3G13560	Glucan endo-1,3-beta-glucosidase 4 [Source:UniProtKB/Swiss-Prot;Acc:Q94CD8]
-1.44376	1.84675e-21	AT3G52710	Uncharacterized protein At3g52710 [Source:UniProtKB/TrEMBL;Acc:Q9LXJ3]
-1.44205	3.70336e-26	AT4G17250	AT4g17250/dl4660w [Source:UniProtKB/TrEMBL;Acc:Q93ZA8]
-1.44196	9.27281e-51	AT1G66970	SHV3-like 2 [Source:UniProtKB/TrEMBL;Acc:F4HQ30]
-1.43995	0.000178243	AT1G05817	-
-1.43867	7.60173e-32	AT2G17720	Prolyl 4-hydroxylase 5 [Source:UniProtKB/Swiss-Prot;Acc:Q24JN5]
-1.43846	1.50204e-17	AT2G23770	LysM domain receptor-like kinase 4 [Source:UniProtKB/Swiss-Prot;Acc:O64825]
-1.43731	2.47135e-53	AT5G03160	DnaJ protein P58IPK homolog [Source:UniProtKB/Swiss-Prot;Acc:Q9LYW9]
-1.43248	1.84377e-25	AT3G54100	O-fucosyltransferase 28 [Source:UniProtKB/Swiss-Prot;Acc:Q9M393]
-1.43227	0.0150405	AT4G25100	Superoxide dismutase [Fe] 1, chloroplastic [Source:UniProtKB/Swiss-Prot;Acc:P21276]
-1.43028	4.42715e-46	AT4G36210	Protein of unknown function (DUF726) [Source:TAIR;Acc:AT4G36210]
-1.43016	3.14302e-43	AT5G38990	Probable receptor-like protein kinase At5g38990 [Source:UniProtKB/Swiss-Prot;Acc:Q9FID9]
-1.42978	6.57158e-41	AT2G23320	Probable WRKY transcription factor 15 [Source:UniProtKB/Swiss-Prot;Acc:O22176]
-1.42824	1.50477e-06	AT4G16745	Exostosin family protein [Source:UniProtKB/TrEMBL;Acc:F4JMK5]
-1.42765	6.35841e-06	AT5G20420	SNF2 domain-containing protein CLASSY 2 [Source:UniProtKB/Swiss-Prot;Acc:F4K493]
-1.42698	1.66944e-45	AT1G30410	multidrug resistance-associated protein 13 [Source:TAIR;Acc:AT1G30410]
-1.42649	2.88035e-11	AT2G38830	Ubiquitin-conjugating enzyme/RWD-like protein [Source:UniProtKB/TrEMBL;Acc:F4ITY4]
-1.42547	6.81852e-30	AT1G27330	At1g27330 [Source:UniProtKB/TrEMBL;Acc:Q84K46]
-1.42321	2.00475e-05	AT4G33355	Non-specific lipid-transfer protein 11 [Source:UniProtKB/Swiss-Prot;Acc:Q2V3C1]
-1.42223	0.00134529	AT1G68200	Zinc finger CCCH domain-containing protein 15 [Source:UniProtKB/Swiss-Prot;Acc:Q9C9F5]
-1.42156	1.25048e-35	AT1G22280	Phytochrome-associated protein phosphatase type 2C [Source:UniProtKB/TrEMBL;Acc:F4I1B4]
-1.42151	9.14804e-19	AT2G40095	Alpha/beta hydrolase related protein [Source:UniProtKB/TrEMBL;Acc:Q8GZ10]
-1.4203	5.33111e-29	AT2G23200	Probable receptor-like protein kinase At2g23200 [Source:UniProtKB/Swiss-Prot;Acc:O22187]
-1.41861	3.20859e-26	AT3G59570	Ypt/Rab-GAP domain of gyp1p superfamily protein [Source:UniProtKB/TrEMBL;Acc:A0A1I9LM99]
-1.41596	1.78719e-46	AT5G39040	ABC transporter B family member 27 [Source:UniProtKB/Swiss-Prot;Acc:Q0WML0]
-1.41418	1.17223e-52	AT4G31500	Cytochrome P450 83B1 [Source:UniProtKB/Swiss-Prot;Acc:O65782]
-1.41368	9.55906e-45	AT3G03560	unknown protein; LOCATED IN: plasma membrane; EXPRESSED IN: 22 plant structures; EXPRESSED DURING: 13 growth stages; BEST Arabidopsis thaliana protein match is: unknown protein (TAIR:AT5G23490.1); Has 157 Blast hits to 146 proteins in 38 species: Ar /.../ 3; Bacteria - 14; Metazoa - 8; Fungi - 0; Plants - 120; Viruses - 0; Other Eukaryotes - 12 (source: NCBI BLink). [Source:TAIR;Acc:AT3G03560]
-1.41366	1.50614e-17	AT2G14580	Pathogenesis-related protein 1 [Source:UniProtKB/Swiss-Prot;Acc:Q9ZNS4]
-1.41351	9.73632e-31	AT3G51660	LS1-like protein [Source:UniProtKB/TrEMBL;Acc:Q8LG92]
-1.41221	1.91478e-35	AT5G12890	Glycosyltransferase [Source:UniProtKB/TrEMBL;Acc:A0A178UHV1]
-1.4105	2.86561e-37	AT5G20830	Sucrose synthase 1 [Source:UniProtKB/Swiss-Prot;Acc:P49040]
-1.4092	2.113e-47	AT2G16700	ATADF5 [Source:UniProtKB/TrEMBL;Acc:A0A178VPY9]
-1.40707	1.00741e-05	AT4G16940	Disease resistance protein (TIR-NBS-LRR class) family [Source:TAIR;Acc:AT4G16940]
-1.40583	2.9064e-21	AT1G80610	At1g80610/T21F11_6 [Source:UniProtKB/TrEMBL;Acc:Q8VYI7]
-1.40562	9.22193e-13	AT3G16510	At3g16510 [Source:UniProtKB/TrEMBL;Acc:Q9LK74]
-1.40509	0.001003	AT3G23510	Cyclopropane-fatty-acyl-phospholipid synthase [Source:UniProtKB/TrEMBL;Acc:Q8GZ28]
-1.40474	1.63005e-45	AT2G26600	Glycosyl hydrolase superfamily protein [Source:UniProtKB/TrEMBL;Acc:O48727]
-1.40287	2.38844e-19	AT3G03440	ARM repeat superfamily protein [Source:UniProtKB/TrEMBL;Acc:F4J139]
-1.40233	2.09174e-08	AT5G10410	Putative clathrin assembly protein At5g10410 [Source:UniProtKB/Swiss-Prot;Acc:Q8H0W9]
-1.40175	2.51383e-24	AT2G24645	Transcriptional factor B3 family protein [Source:TAIR;Acc:AT2G24645]
-1.40146	2.24495e-05	AT1G73500	Mitogen-activated protein kinase kinase 9 [Source:UniProtKB/Swiss-Prot;Acc:Q9FX43]
-1.40084	1.51107e-41	AT1G71040	Multicopper oxidase LPR2 [Source:UniProtKB/Swiss-Prot;Acc:Q949X9]
-1.39877	2.61477e-07	AT4G37690	Glycosyltransferase 6 [Source:UniProtKB/Swiss-Prot;Acc:Q9SZG1]
-1.3964	2.9388e-24	AT4G36710	HAM4 [Source:UniProtKB/TrEMBL;Acc:A0A178UVI6]
-1.39627	5.99146e-28	AT2G32150	At2g32150/F22D22.10 [Source:UniProtKB/TrEMBL;Acc:Q9SKY5]
-1.39514	0.0438316	AT2G29470	Glutathione S-transferase U3 [Source:UniProtKB/Swiss-Prot;Acc:Q9ZW28]
-1.39497	7.11228e-41	AT3G44400	Disease resistance protein (TIR-NBS-LRR class) family [Source:UniProtKB/TrEMBL;Acc:Q9M285]
-1.39488	7.04563e-10	AT5G38900	Thioredoxin superfamily protein [Source:TAIR;Acc:AT5G38900]
-1.39376	8.54254e-33	AT1G63860	Disease resistance protein (TIR-NBS-LRR class) family [Source:UniProtKB/TrEMBL;Acc:F4I3S8]
-1.39303	1.73461e-35	AT2G19710	Regulator of Vps4 activity in the MVB pathway protein [Source:UniProtKB/TrEMBL;Acc:F4ITF9]
-1.39263	1.80115e-07	AT3G29575	Ninja-family protein AFP3 [Source:UniProtKB/Swiss-Prot;Acc:Q94F39]
-1.39181	3.00824e-15	AT3G57480	Zinc finger AN1 and C2H2 domain-containing stress-associated protein 13 [Source:UniProtKB/Swiss-Prot;Acc:Q9SCM4]
-1.39095	7.1153e-35	AT2G25520	Probable sugar phosphate/phosphate translocator At2g25520 [Source:UniProtKB/Swiss-Prot;Acc:Q9SKJ7]
-1.39056	5.52718e-28	AT5G37070	At5g37070 [Source:UniProtKB/TrEMBL;Acc:Q9FHW0]
-1.39031	0.000954969	AT4G28790	Uncharacterized protein At4g28790 (Fragment) [Source:UniProtKB/TrEMBL;Acc:C0SVK2]
-1.3887	0.00690346	AT3G13130	Transmembrane protein [Source:UniProtKB/TrEMBL;Acc:Q9LK60]
-1.38801	2.13527e-27	AT5G19980	GDP-fucose transporter 1 [Source:UniProtKB/Swiss-Prot;Acc:Q84L08]
-1.3876	2.64588e-05	AT4G37400	Cytochrome P450 81F3 [Source:UniProtKB/Swiss-Prot;Acc:Q0WTF4]
-1.38689	3.74832e-25	AT4G17900	At4g17900 [Source:UniProtKB/TrEMBL;Acc:Q0WUB8]
-1.38657	2.51153e-24	AT4G36150	Disease resistance protein (TIR-NBS-LRR class) family [Source:UniProtKB/TrEMBL;Acc:O65507]
-1.38604	0.0146221	AT3G57450	At3g57450 [Source:UniProtKB/TrEMBL;Acc:Q9SCM7]
-1.38582	4.61797e-05	AT1G03660	Ankyrin-repeat containing protein [Source:UniProtKB/TrEMBL;Acc:F4I2G0]
-1.38534	3.04956e-55	AT5G53370	pectin methylesterase PCR fragment F [Source:TAIR;Acc:AT5G53370]
-1.38523	2.67948e-44	AT4G08850	MDIS1-interacting receptor like kinase 2 [Source:UniProtKB/Swiss-Prot;Acc:Q8VZG8]
-1.383	8.11307e-35	AT3G21630	Chitin elicitor receptor kinase 1 [Source:UniProtKB/Swiss-Prot;Acc:A8R7E6]
-1.38214	0.00143307	AT5G44582	unknown protein; FUNCTIONS IN: molecular_function unknown; INVOLVED IN: biological_process unknown; LOCATED IN: endomembrane system; BEST Arabidopsis thaliana protein match is: unknown protein (TAIR:AT5G44580.1); Has 24 Blast hits to 24 proteins in /.../ies: Archae - 0; Bacteria - 0; Metazoa - 0; Fungi - 0; Plants - 24; Viruses - 0; Other Eukaryotes - 0 (source: NCBI BLink). [Source:TAIR;Acc:AT5G…
-1.38174	2.63971e-26	AT1G33560	Disease resistance protein ADR1 [Source:UniProtKB/Swiss-Prot;Acc:Q9FW44]
-1.38082	0.0330152	AT1G22480	At1g22480 [Source:UniProtKB/TrEMBL;Acc:Q9SK90]
-1.37851	0.0434898	AT1G08857	-
-1.37802	1.28143e-31	AT3G50950	Disease resistance RPP13-like protein 4 [Source:UniProtKB/Swiss-Prot;Acc:Q38834]
-1.3764	5.75734e-31	AT1G01240	At1g01240/F6F3_11 [Source:UniProtKB/TrEMBL;Acc:Q9LNJ7]
-1.3762	1.01078e-09	AT1G14870	PCR2 [Source:UniProtKB/TrEMBL;Acc:A0A178WDU8]
-1.37526	8.72237e-27	AT5G03320	Serine/threonine-protein kinase PCRK2 [Source:UniProtKB/Swiss-Prot;Acc:Q9LZF8]
-1.3744	3.05427e-05	AT4G37010	Centrin 2 [Source:UniProtKB/TrEMBL;Acc:B6EUB9]
-1.37271	3.5389e-23	AT5G25040	Major facilitator superfamily protein [Source:TAIR;Acc:AT5G25040]
-1.37169	2.40175e-18	AT1G30755	Elongation factor G, putative (DUF668) [Source:UniProtKB/TrEMBL;Acc:Q8L5Y3]
-1.37131	7.4052e-48	AT5G28540	Mediator of RNA polymerase II transcription subunit 37a [Source:UniProtKB/Swiss-Prot;Acc:Q9LKR3]
-1.37117	2.93683e-21	AT2G29990	Internal alternative NAD(P)H-ubiquinone oxidoreductase A2, mitochondrial [Source:UniProtKB/Swiss-Prot;Acc:O80874]
-1.36923	0.00295198	AT1G26558	other RNA [Source:TAIR;Acc:AT1G26558]
-1.36824	1.3014e-15	AT4G32200	Meiosis-specific protein ASY2 [Source:UniProtKB/Swiss-Prot;Acc:F4JTJ9]
-1.36632	0.00815792	AT4G24026	Putative uncharacterized protein [Source:UniProtKB/TrEMBL;Acc:Q0WQ09]
-1.366	1.15032e-06	AT5G55560	Probable serine/threonine-protein kinase WNK11 [Source:UniProtKB/Swiss-Prot;Acc:Q6ICW6]
-1.36535	1.21775e-21	AT1G02740	Protein MRG2 [Source:UniProtKB/Swiss-Prot;Acc:Q4V3E2]
-1.36509	1.87886e-05	AT1G26380	Berberine bridge enzyme-like 3 [Source:UniProtKB/Swiss-Prot;Acc:Q9FZC4]
-1.36448	3.50078e-29	AT4G19660	NPR1-like protein 4 [Source:TAIR;Acc:AT4G19660]
-1.36429	0.00473521	AT3G22600	AT3g22600/F16J14_17 [Source:UniProtKB/TrEMBL;Acc:Q9LJ86]
-1.35908	1.64819e-05	AT4G19510	Disease resistance protein (TIR-NBS-LRR class) [Source:TAIR;Acc:AT4G19510]
-1.35755	4.42811e-42	AT3G51000	AT3g51000/F24M12_40 [Source:UniProtKB/TrEMBL;Acc:Q9SD45]
-1.35631	3.42056e-05	AT3G46600	Scarecrow-like protein 30 [Source:UniProtKB/Swiss-Prot;Acc:Q9SNB8]
-1.35629	3.39675e-17	AT1G53110	Proton pump-interactor 4 [Source:UniProtKB/Swiss-Prot;Acc:Q8VZN4]
-1.35601	6.02375e-07	AT4G34880	Amidase family protein [Source:TAIR;Acc:AT4G34880]
-1.35586	1.43734e-13	AT3G09020	Alpha 1,4-glycosyltransferase family protein [Source:UniProtKB/TrEMBL;Acc:Q9S790]
-1.35502	2.57861e-29	AT1G26130	Phospholipid-transporting ATPase [Source:UniProtKB/TrEMBL;Acc:F4IE35]
-1.35451	2.18188e-39	AT5G62620	Hydroxyproline O-galactosyltransferase GALT6 [Source:UniProtKB/Swiss-Prot;Acc:Q9LV16]
-1.35115	1.48336e-27	AT4G02405	S-adenosyl-L-methionine-dependent methyltransferases superfamily protein [Source:UniProtKB/TrEMBL;Acc:B3H6G9]
-1.3505	2.11207e-05	AT3G04181	unknown protein; FUNCTIONS IN: molecular_function unknown; INVOLVED IN: biological_process unknown; LOCATED IN: cellular_component unknown; Has 30201 Blast hits to 17322 proteins in 780 species: Archae - 12; Bacteria - 1396; Metazoa - 17338; Fungi - /.../ Plants - 5037; Viruses - 0; Other Eukaryotes - 2996 (source: NCBI BLink). [Source:TAIR;Acc:AT3G04181]
-1.34998	1.15423e-21	AT1G69440	Protein argonaute 7 [Source:UniProtKB/Swiss-Prot;Acc:Q9C793]
-1.34969	7.32481e-12	AT5G62020	HSFB2A [Source:UniProtKB/TrEMBL;Acc:A0A178UCK7]
-1.34967	2.29321e-06	AT4G13575	unknown protein; FUNCTIONS IN: molecular_function unknown; INVOLVED IN: biological_process unknown; LOCATED IN: cellular_component unknown; Has 30201 Blast hits to 17322 proteins in 780 species: Archae - 12; Bacteria - 1396; Metazoa - 17338; Fungi - /.../ Plants - 5037; Viruses - 0; Other Eukaryotes - 2996 (source: NCBI BLink). [Source:TAIR;Acc:AT4G13575]
-1.34937	3.12673e-14	AT5G56610	At5g56610 [Source:UniProtKB/TrEMBL;Acc:Q6NKR2]
-1.34843	6.89459e-14	AT5G61540	Probable isoaspartyl peptidase/L-asparaginase 3 [Source:UniProtKB/Swiss-Prot;Acc:Q56W64]
-1.34587	1.5752e-26	AT1G72330	alanine aminotransferase 2 [Source:TAIR;Acc:AT1G72330]
-1.34539	3.77102e-05	AT5G56230	PRA1 family protein G2 [Source:UniProtKB/Swiss-Prot;Acc:Q9FH16]
-1.34506	8.24255e-27	AT1G75380	Bifunctional nuclease 1 [Source:UniProtKB/Swiss-Prot;Acc:Q9FWS6]
-1.34415	5.50664e-27	AT4G21534	Sphingosine kinase 2 [Source:UniProtKB/Swiss-Prot;Acc:F2Y4A3]
-1.34314	0.0279957	AT2G03770	Cytosolic sulfotransferase 13 [Source:UniProtKB/Swiss-Prot;Acc:Q9ZPQ5]
-1.34305	4.20556e-30	AT5G61530	Uncharacterized Rho GTPase-activating protein At5g61530 [Source:UniProtKB/Swiss-Prot;Acc:Q3E875]
-1.34058	1.09593e-37	AT1G52780	Protein of unknown function (DUF2921) [Source:TAIR;Acc:AT1G52780]
-1.33928	2.95355e-35	AT2G27920	Serine carboxypeptidase-like 51 [Source:UniProtKB/Swiss-Prot;Acc:Q67Y83]
-1.33863	6.27033e-47	AT4G16660	heat shock protein 70 (Hsp 70) family protein [Source:TAIR;Acc:AT4G16660]
-1.33756	1.46445e-30	AT3G63080	Probable glutathione peroxidase 5 [Source:UniProtKB/Swiss-Prot;Acc:Q9LYB4]
-1.33712	8.43124e-10	AT3G52480	At3g52480 [Source:UniProtKB/TrEMBL;Acc:Q9SVC9]
-1.33692	1.39424e-29	AT4G39390	UDP-rhamnose/UDP-galactose transporter 4 [Source:UniProtKB/Swiss-Prot;Acc:Q8RWW7]
-1.3353	1.12846e-29	AT1G35580	Alkaline/neutral invertase CINV1 [Source:UniProtKB/Swiss-Prot;Acc:Q9LQF2]
-1.33498	0.004106	AT2G35980	NDR1/HIN1-like protein 10 [Source:UniProtKB/Swiss-Prot;Acc:Q9SJ52]
-1.33473	1.24247e-29	AT2G18700	Probable alpha,alpha-trehalose-phosphate synthase [UDP-forming] 11 [Source:UniProtKB/Swiss-Prot;Acc:Q9ZV48]
-1.3346	0.00407615	AT2G15220	At2g15220/F15A23.4 [Source:UniProtKB/TrEMBL;Acc:Q9SKL6]
-1.33427	5.33343e-05	AT4G03460	Ankyrin repeat family protein [Source:TAIR;Acc:AT4G03460]
-1.33365	8.30705e-22	AT1G03370	C2 and GRAM domain-containing protein At1g03370 [Source:UniProtKB/Swiss-Prot;Acc:Q9ZVT9]
-1.33254	4.87171e-40	AT4G22670	FAM10 family protein At4g22670 [Source:UniProtKB/Swiss-Prot;Acc:Q93YR3]
-1.33222	1.76639e-21	AT5G52310	Low-temperature-induced 78 kDa protein [Source:UniProtKB/Swiss-Prot;Acc:Q06738]
-1.32895	0.00402329	AT5G67410	Transcriptional regulator of RNA polII, SAGA, subunit [Source:UniProtKB/TrEMBL;Acc:Q9FN12]
-1.32881	2.66267e-25	AT5G06610	Gb [Source:UniProtKB/TrEMBL;Acc:Q9FG09]
-1.32739	2.42572e-35	AT4G23180	Cysteine-rich receptor-like protein kinase 10 [Source:UniProtKB/Swiss-Prot;Acc:Q8GYA4]
-1.32726	0.0163546	AT4G25480	Dehydration-responsive element-binding protein 1A [Source:UniProtKB/Swiss-Prot;Acc:Q9M0L0]
-1.32643	5.49484e-30	AT5G37480	Maltase-glucoamylase, intestinal protein [Source:UniProtKB/TrEMBL;Acc:Q8RWG7]
-1.32638	7.01527e-36	AT1G31130	F28K20.6 protein [Source:UniProtKB/TrEMBL;Acc:Q9SA06]
-1.32621	3.45512e-18	AT3G24500	MBF1C [Source:UniProtKB/TrEMBL;Acc:A0A178VDH9]
-1.32558	0.0079411	XLOC_029458	Putative AC transposase
-1.32462	6.61468e-24	AT1G71100	Probable ribose-5-phosphate isomerase 1 [Source:UniProtKB/Swiss-Prot;Acc:Q9C998]
-1.32452	1.86887e-44	AT5G21090	Leucine-rich repeat protein 1 [Source:UniProtKB/Swiss-Prot;Acc:Q9FPJ5]
-1.32434	8.70435e-31	AT4G02220	Putative zinc finger protein [Source:UniProtKB/TrEMBL;Acc:Q93VB4]
-1.32403	1.9498e-49	AT4G19520	Probable disease resistance protein At4g19520 [Source:UniProtKB/Swiss-Prot;Acc:F4JT82]
-1.3226	5.07582e-39	AT5G15860	Isoprenylcysteine alpha-carbonyl methylesterase ICME [Source:UniProtKB/Swiss-Prot;Acc:Q94AS5]
-1.32248	1.66971e-20	AT1G04990	Zinc finger CCCH domain-containing protein 3 [Source:UniProtKB/Swiss-Prot;Acc:Q94AD9]
-1.32231	5.38724e-34	AT2G45500	AAA-type ATPase family protein [Source:TAIR;Acc:AT2G45500]
-1.32193	7.23356e-05	AT4G29050	Concanavalin A-like lectin protein kinase family protein [Source:TAIR;Acc:AT4G29050]
-1.32132	1.64532e-35	AT1G59620	Disease resistance protein (CC-NBS-LRR class) family [Source:TAIR;Acc:AT1G59620]
-1.31958	0.00259346	AT4G21930	Uncharacterized protein At4g21930 [Source:UniProtKB/TrEMBL;Acc:Q8L864]
-1.31789	1.00671e-16	AT5G22630	Arogenate dehydratase [Source:UniProtKB/TrEMBL;Acc:A0A178UL55]
-1.31626	3.48465e-08	AT4G35985	Senescence/dehydration-associated protein At4g35985, chloroplastic [Source:UniProtKB/Swiss-Prot;Acc:F4JNX2]
-1.31623	2.60855e-16	AT3G63380	Calcium-transporting ATPase [Source:UniProtKB/TrEMBL;Acc:A0A178VEV7]
-1.31616	3.66149e-26	AT3G16565	Threonyl and alanyl tRNA synthetase second additional domain-containing protein [Source:UniProtKB/TrEMBL;Acc:A0A1I9LMV6]
-1.31543	4.08979e-13	AT5G40240	WAT1-related protein [Source:UniProtKB/TrEMBL;Acc:F4KHA9]
-1.3148	4.56252e-23	AT5G13190	CONTAINS InterPro DOMAIN/s: LPS-induced tumor necrosis factor alpha factor (InterPro:IPR006629); Has 30201 Blast hits to 17322 proteins in 780 species: Archae - 12; Bacteria - 1396; Metazoa - 17338; Fungi - 3422; Plants - 5037; Viruses - 0; Other Eu /.../es - 2996 (source: NCBI BLink). [Source:TAIR;Acc:AT5G13190]
-1.31469	3.53716e-22	AT5G44580	AT5g44580/K15C23_2 [Source:UniProtKB/TrEMBL;Acc:Q9LU08]
-1.3132	4.94648e-07	AT2G44910	Uncharacterized protein At2g44910 (Fragment) [Source:UniProtKB/TrEMBL;Acc:C0SV86]
-1.31314	1.581e-33	AT5G44070	PCS1 [Source:UniProtKB/TrEMBL;Acc:A0A178UMN4]
-1.31288	0.000218257	AT2G21350	RNA-binding CRS1 / YhbY (CRM) domain protein [Source:UniProtKB/TrEMBL;Acc:F4IGM0]
-1.31005	5.69044e-33	AT1G17500	Phospholipid-transporting ATPase [Source:UniProtKB/TrEMBL;Acc:A0A178W5K3]
-1.30993	2.68664e-22	AT5G62900	Basic-leucine zipper transcription factor K [Source:UniProtKB/TrEMBL;Acc:Q9FM06]
-1.30933	0.0330464	AT3G55890	Protein yippee-like [Source:UniProtKB/TrEMBL;Acc:Q0WPD7]
-1.30868	7.53865e-35	AT5G01980	At5g01980 [Source:UniProtKB/TrEMBL;Acc:Q9LZN3]
-1.30811	2.0566e-26	AT1G25580	SUPPRESSOR OF GAMMA RESPONSE 1 [Source:UniProtKB/Swiss-Prot;Acc:Q6NQK2]
-1.30785	0.00137677	AT1G33612	Leucine-rich repeat (LRR) family protein [Source:UniProtKB/TrEMBL;Acc:F4HR92]
-1.3074	0.0418273	AT3G44300	NIT2 [Source:UniProtKB/TrEMBL;Acc:A0A178V952]
-1.30669	2.9529e-06	AT1G23130	At1g23130/T26J12_10 [Source:UniProtKB/TrEMBL;Acc:O49304]
-1.30618	0.00698866	AT5G44260	Zinc finger CCCH domain-containing protein 61 [Source:UniProtKB/Swiss-Prot;Acc:Q9FKW2]
-1.3061	9.29372e-12	AT5G20110	At5g20110 [Source:UniProtKB/TrEMBL;Acc:Q6NM36]
-1.3057	4.60026e-25	AT3G51980	ARM repeat superfamily protein [Source:UniProtKB/TrEMBL;Acc:Q9SV06]
-1.30554	3.56725e-13	AT3G49370	CDPK-related kinase 6 [Source:UniProtKB/Swiss-Prot;Acc:Q9SG12]
-1.30477	3.95073e-13	AT4G08230	Glycine-rich protein [Source:UniProtKB/TrEMBL;Acc:Q8VY68]
-1.30404	8.82188e-37	AT2G11520	Calmodulin-binding receptor-like cytoplasmic kinase 3 [Source:UniProtKB/Swiss-Prot;Acc:Q9ASQ5]
-1.30391	0.00346944	AT5G61550	U-box domain-containing protein kinase family protein [Source:UniProtKB/TrEMBL;Acc:F4K3J3]
-1.30308	7.10638e-30	AT4G01610	Cathepsin B-like protease 3 [Source:UniProtKB/Swiss-Prot;Acc:Q94K85]
-1.30276	2.94126e-09	AT1G10070	Branched-chain-amino-acid aminotransferase 2, chloroplastic [Source:UniProtKB/Swiss-Prot;Acc:Q9M439]
-1.30165	7.14232e-40	AT2G25110	Stromal cell-derived factor 2-like protein [Source:UniProtKB/Swiss-Prot;Acc:Q93ZE8]
-1.29852	0.0294124	AT3G61270	Glycosyltransferase [Source:UniProtKB/TrEMBL;Acc:Q9M2D7]
-1.29759	8.63019e-38	AT1G55450	S-adenosyl-L-methionine-dependent methyltransferases superfamily protein [Source:UniProtKB/TrEMBL;Acc:F4I0B5]
-1.29735	0.000672453	AT4G19970	CONTAINS InterPro DOMAIN/s: Nucleotide-diphospho-sugar transferase, predicted (InterPro:IPR005069); BEST Arabidopsis thaliana protein match is: Nucleotide-diphospho-sugar transferase family protein (TAIR:AT5G44820.1); Has 801 Blast hits to 466 prote /.../ 35 species: Archae - 0; Bacteria - 0; Metazoa - 2; Fungi - 0; Plants - 750; Viruses - 0; Other Eukaryotes - 49 (source: NCBI BLink). [Source:TA…
-1.29705	1.32688e-20	AT4G17695	Probable transcription factor KAN3 [Source:UniProtKB/Swiss-Prot;Acc:Q941I2]
-1.2961	2.52812e-37	AT3G04480	Endoribonuclease [Source:UniProtKB/TrEMBL;Acc:F4J3Q1]
-1.29607	4.15296e-07	AT3G27940	LOB domain-containing protein 26 [Source:UniProtKB/Swiss-Prot;Acc:Q9LIJ0]
-1.29592	4.86402e-24	AT5G40880	Uncharacterized protein At5g40880 (Fragment) [Source:UniProtKB/TrEMBL;Acc:C0SVR8]
-1.29521	0.00566831	AT5G17330	Glutamate decarboxylase 1 [Source:UniProtKB/Swiss-Prot;Acc:Q42521]
-1.29407	3.14794e-05	AT2G36780	UDP-glycosyltransferase 73C3 [Source:UniProtKB/Swiss-Prot;Acc:Q9ZQ96]
-1.29278	0.0185019	AT1G05783	-
-1.29172	5.20509e-25	AT3G49530	NAC domain-containing protein 62 [Source:UniProtKB/Swiss-Prot;Acc:Q9SCK6]
-1.29112	4.04503e-20	AT1G19270	DA1 [Source:UniProtKB/TrEMBL;Acc:A0A178WC71]
-1.28863	1.77451e-14	AT3G03020	AT3G03020 protein [Source:UniProtKB/TrEMBL;Acc:Q8GUN0]
-1.2885	1.40645e-33	AT2G17130	Isocitrate dehydrogenase [NAD] regulatory subunit 2, mitochondrial [Source:UniProtKB/Swiss-Prot;Acc:P93032]
-1.28847	1.03553e-21	AT2G47800	ABC transporter C family member 4 [Source:UniProtKB/Swiss-Prot;Acc:Q7DM58]
-1.28772	2.61541e-35	AT3G15350	AT3g15350/K7L4_15 [Source:UniProtKB/TrEMBL;Acc:Q9LE60]
-1.28719	1.37203e-42	AT5G39950	Thioredoxin H2 [Source:UniProtKB/Swiss-Prot;Acc:Q38879]
-1.28605	1.23703e-25	AT1G53710	Calcineurin-like metallo-phosphoesterase superfamily protein [Source:UniProtKB/TrEMBL;Acc:A8MQN4]
-1.28518	4.61349e-38	AT5G54730	Autophagy-related protein 18f [Source:UniProtKB/Swiss-Prot;Acc:Q9FH32]
-1.28446	1.0891e-22	AT5G39050	Phenolic glucoside malonyltransferase 1 [Source:UniProtKB/Swiss-Prot;Acc:Q940Z5]
-1.28381	6.25724e-22	AT3G16700	Probable acylpyruvase FAHD2, mitochondrial [Source:UniProtKB/Swiss-Prot;Acc:Q9LUR3]
-1.28253	3.04203e-09	AT5G64110	Peroxidase [Source:UniProtKB/TrEMBL;Acc:A0A178UNC2]
-1.28253	3.92148e-13	AT3G59700	L-type lectin-domain containing receptor kinase V.5 [Source:UniProtKB/Swiss-Prot;Acc:Q96285]
-1.28112	2.48135e-38	AT5G53120	Spermidine synthase 3 [Source:UniProtKB/TrEMBL;Acc:F4KJ05]
-1.28078	9.89241e-09	AT4G00234	BEST Arabidopsis thaliana protein match is: Mechanosensitive ion channel protein (TAIR:AT4G00290.1); Has 57 Blast hits to 57 proteins in 12 species: Archae - 0; Bacteria - 0; Metazoa - 0; Fungi - 0; Plants - 56; Viruses - 0; Other Eukaryotes - 1 (so /.../NCBI BLink). [Source:TAIR;Acc:AT4G00234]
-1.28067	1.11047e-31	AT3G14620	AT3g14620/MIE1_12 [Source:UniProtKB/TrEMBL;Acc:Q9LUD2]
-1.28013	4.4208e-39	AT3G62370	Heme binding protein [Source:UniProtKB/TrEMBL;Acc:Q9LZQ3]
-1.28005	1.08495e-21	AT1G14170	F7A19.25 protein [Source:UniProtKB/TrEMBL;Acc:Q9XI71]
-1.27821	4.86676e-15	AT1G30260	At1g30260/F12P21_9 [Source:UniProtKB/TrEMBL;Acc:Q9C754]
-1.27811	4.02066e-28	AT1G32340	RBR-type E3 ubiquitin transferase [Source:UniProtKB/TrEMBL;Acc:Q9LQM5]
-1.27669	2.14565e-29	AT1G13000	Transmembrane protein, putative (DUF707) [Source:UniProtKB/TrEMBL;Acc:Q8VYF6]
-1.27652	0.0147522	AT5G53870	At5g53870 [Source:UniProtKB/TrEMBL;Acc:Q9FN39]
-1.27501	3.34184e-25	AT4G39950	cytochrome P450, family 79, subfamily B, polypeptide 2 [Source:TAIR;Acc:AT4G39950]
-1.27497	5.96897e-15	AT3G14430	At3g14430 [Source:UniProtKB/TrEMBL;Acc:Q9LRR8]
-1.27497	4.96956e-19	AT1G80420	DNA-repair protein XRCC1 [Source:UniProtKB/Swiss-Prot;Acc:Q24JK4]
-1.27367	1.58588e-07	AT1G74200	Putative receptor-like protein 16 [Source:UniProtKB/Swiss-Prot;Acc:F4HTV6]
-1.27317	3.24424e-24	AT1G69720	Heme oxygenase 3, chloroplastic [Source:UniProtKB/Swiss-Prot;Acc:Q9C9L4]
-1.27177	9.39852e-33	AT5G45550	MOB1-like protein [Source:UniProtKB/TrEMBL;Acc:A0A178UCG9]
-1.27079	2.91859e-41	AT3G13235	DDI1 [Source:UniProtKB/TrEMBL;Acc:A0A178VJ92]
-1.27045	6.83326e-25	AT2G26240	Protein FATTY ACID EXPORT 7 [Source:UniProtKB/Swiss-Prot;Acc:O64847]
-1.26987	3.63411e-39	AT2G40830	Probable E3 ubiquitin-protein ligase RHC1A [Source:UniProtKB/Swiss-Prot;Acc:O22197]
-1.26962	1.30224e-29	AT1G26690	Transmembrane emp24 domain-containing protein p24delta9 [Source:UniProtKB/Swiss-Prot;Acc:Q9LQY3]
-1.26737	1.38416e-18	AT2G29720	FAD/NAD(P)-binding oxidoreductase family protein [Source:UniProtKB/TrEMBL;Acc:O82384]
-1.26708	1.99887e-44	AT1G79380	E3 ubiquitin-protein ligase RGLG4 [Source:UniProtKB/Swiss-Prot;Acc:Q9SAL0]
-1.26663	7.0017e-12	AT5G54140	IAA-amino acid hydrolase ILR1-like 3 [Source:UniProtKB/Swiss-Prot;Acc:O81641]
-1.26529	2.57204e-32	AT2G47730	Glutathione S-transferase F8, chloroplastic [Source:UniProtKB/Swiss-Prot;Acc:Q96266]
-1.26303	0.0252421	AT5G13990	EXO70C2 [Source:UniProtKB/TrEMBL;Acc:A0A178UPG0]
-1.26284	2.45439e-29	AT1G20780	RING-type E3 ubiquitin transferase [Source:UniProtKB/TrEMBL;Acc:A0A178W875]
-1.26171	2.76923e-06	AT4G23700	Cation/H(+) antiporter 17 [Source:UniProtKB/Swiss-Prot;Acc:Q9SUQ7]
-1.26148	3.52049e-28	AT4G25900	Glucose-6-phosphate 1-epimerase [Source:UniProtKB/TrEMBL;Acc:Q940G5]
-1.26104	1.39981e-36	AT2G45010	PLAC8 family protein [Source:UniProtKB/TrEMBL;Acc:Q8L3T0]
-1.2609	3.60693e-45	AT2G43970	La-related protein 6B [Source:UniProtKB/Swiss-Prot;Acc:O80567]
-1.25857	2.60462e-21	AT4G16780	Homeobox-leucine zipper protein HAT4 [Source:UniProtKB/Swiss-Prot;Acc:Q05466]
-1.25834	7.15568e-08	XLOC_014689	-
-1.25594	1.65424e-42	AT2G24360	Serine/threonine-protein kinase STY13 [Source:UniProtKB/Swiss-Prot;Acc:Q9ZQ31]
-1.25512	2.14483e-33	AT3G44630	Disease resistance protein (TIR-NBS-LRR class) family [Source:UniProtKB/TrEMBL;Acc:F4J359]
-1.2547	3.37003e-46	AT2G03510	Expressed protein [Source:UniProtKB/TrEMBL;Acc:Q9ZQ87]
-1.25431	1.48784e-12	AT1G18740	At1g18740/F6A14_15 [Source:UniProtKB/TrEMBL;Acc:Q9M9U5]
-1.2529	4.12304e-16	AT4G23885	At4g23885 [Source:UniProtKB/TrEMBL;Acc:Q2HIQ5]
-1.25262	5.87233e-20	AT2G16660	At2g16660/T24I21.7 [Source:UniProtKB/TrEMBL;Acc:Q9SLF1]
-1.25203	4.06977e-16	AT5G28830	calcium-binding EF hand family protein [Source:TAIR;Acc:AT5G28830]
-1.25091	2.99112e-40	AT1G17290	Alanine aminotransferase 1, mitochondrial [Source:UniProtKB/Swiss-Prot;Acc:F4I7I0]
-1.25075	5.21233e-22	AT1G75020	Probable 1-acyl-sn-glycerol-3-phosphate acyltransferase 4 [Source:UniProtKB/Swiss-Prot;Acc:Q8L4Y2]
-1.24805	2.46712e-31	AT4G16950	Disease resistance protein RPP5 [Source:UniProtKB/Swiss-Prot;Acc:F4JNB7]
-1.24714	5.00221e-24	AT1G28260	Protein SMG7L [Source:UniProtKB/Swiss-Prot;Acc:Q9FZ99]
-1.24692	9.10351e-23	AT1G33970	Immune-associated nucleotide-binding protein 9 [Source:UniProtKB/Swiss-Prot;Acc:F4HT21]
-1.24691	0.000167969	XLOC_006996	Putative AC transposase
-1.24651	1.279e-39	AT2G37110	At2g37110 [Source:UniProtKB/TrEMBL;Acc:Q9ZQC8]
-1.24622	1.19866e-07	AT4G11350	At4g11350 [Source:UniProtKB/TrEMBL;Acc:B6IDH2]
-1.24601	2.78234e-29	AT3G11280	Duplicated homeodomain-like superfamily protein [Source:UniProtKB/TrEMBL;Acc:Q9C773]
-1.24544	3.63981e-24	AT2G17220	Probable serine/threonine-protein kinase PIX13 [Source:UniProtKB/Swiss-Prot;Acc:Q9SII6]
-1.24184	2.49216e-27	AT3G17800	Protein of unknown function (DUF760) [Source:TAIR;Acc:AT3G17800]
-1.2416	8.78998e-16	AT1G76620	At1g76620/F14G6_22 [Source:UniProtKB/TrEMBL;Acc:Q8W4R7]
-1.2404	0.0265301	AT5G39120	Germin-like protein subfamily 1 member 15 [Source:UniProtKB/Swiss-Prot;Acc:Q9FIC9]
-1.23882	8.76487e-13	AT3G20420	Ribonuclease 3-like protein 2 [Source:UniProtKB/Swiss-Prot;Acc:Q9LTQ0]
-1.23873	3.83152e-10	AT1G07020	Uncharacterized protein At1g07020 [Source:UniProtKB/TrEMBL;Acc:Q8LCS6]
-1.23852	7.43232e-16	AT4G02410	L-type lectin-domain containing receptor kinase IV.3 [Source:UniProtKB/Swiss-Prot;Acc:O81292]
-1.23679	9.0592e-27	AT4G03080	Serine/threonine-protein phosphatase BSL1 [Source:UniProtKB/Swiss-Prot;Acc:Q8L7U5]
-1.23611	1.55508e-19	AT1G17460	TRF-like 3 [Source:UniProtKB/TrEMBL;Acc:F4I7K3]
-1.23539	4.68649e-14	AT5G06450	Uncharacterized protein At5g06450 [Source:UniProtKB/Swiss-Prot;Acc:Q9FNG3]
-1.23506	2.25123e-12	AT1G18390	Protein kinase superfamily protein [Source:TAIR;Acc:AT1G18390]
-1.23278	8.34011e-06	AT1G02930	Glutathione S-transferase F6 [Source:UniProtKB/Swiss-Prot;Acc:P42760]
-1.23245	0.000618563	AT4G39580	F-box/kelch-repeat protein At4g39580 [Source:UniProtKB/Swiss-Prot;Acc:Q9SVA0]
-1.23238	2.7089e-36	AT5G08380	Alpha-galactosidase 1 [Source:UniProtKB/Swiss-Prot;Acc:Q9FT97]
-1.23211	2.26317e-35	AT5G57580	Calmodulin-binding protein 60 B [Source:UniProtKB/Swiss-Prot;Acc:Q9FKL6]
-1.23166	1.0166e-14	AT4G22840	Probable sodium/metabolite cotransporter BASS6, chloroplastic [Source:UniProtKB/Swiss-Prot;Acc:Q8VYY4]
-1.2306	1.70823e-40	AT5G45800	MEE62 [Source:UniProtKB/TrEMBL;Acc:A0A178UKF2]
-1.23033	2.58253e-32	AT1G20510	4-coumarate--CoA ligase-like 5 [Source:UniProtKB/Swiss-Prot;Acc:Q84P21]
-1.23021	1.39627e-19	AT4G21980	Autophagy-related protein [Source:UniProtKB/TrEMBL;Acc:A8MS84]
-1.22872	1.96714e-20	AT1G70530	Cysteine-rich receptor-like protein kinase 3 [Source:UniProtKB/Swiss-Prot;Acc:Q9CAL2]
-1.22648	5.09071e-14	AT3G56440	Autophagy-related protein 18d [Source:UniProtKB/Swiss-Prot;Acc:Q0WPK3]
-1.22628	7.28049e-14	AT4G22980	Molybdenum cofactor sulfurase-like protein [Source:UniProtKB/TrEMBL;Acc:O82746]
-1.22599	1.29398e-05	AT5G01610	Uncharacterized protein At5g01610 [Source:UniProtKB/Swiss-Prot;Acc:Q9M015]
-1.22574	1.18158e-27	AT4G08480	Mitogen-activated protein kinase kinase kinase 9 [Source:UniProtKB/Swiss-Prot;Acc:O81472]
-1.22498	0.0113162	AT2G24550	At2g24550/F25P17.15 [Source:UniProtKB/TrEMBL;Acc:Q945P6]
-1.2248	7.22898e-29	AT3G12360	Ankyrin repeat-containing protein ITN1 [Source:UniProtKB/Swiss-Prot;Acc:Q9C7A2]
-1.22477	3.42653e-11	AT1G71170	Probable 3-hydroxyisobutyrate dehydrogenase-like 2, mitochondrial [Source:UniProtKB/Swiss-Prot;Acc:Q9C991]
-1.21971	2.92539e-23	AT5G47420	Tryptophan RNA-binding attenuator protein-like protein [Source:UniProtKB/TrEMBL;Acc:Q8RXM5]
-1.21723	0.0121676	AT2G15880	Pollen-specific leucine-rich repeat extensin-like protein 3 [Source:UniProtKB/Swiss-Prot;Acc:Q9XIL9]
-1.21254	0.0344254	AT1G29230	Non-specific serine/threonine protein kinase [Source:UniProtKB/TrEMBL;Acc:A0A178WD98]
-1.21222	1.72334e-13	AT1G22650	Probable alkaline/neutral invertase D [Source:UniProtKB/Swiss-Prot;Acc:F4I2X9]
-1.2088	9.09209e-20	AT5G58620	Zinc finger CCCH domain-containing protein 66 [Source:UniProtKB/Swiss-Prot;Acc:Q9LUZ4]
-1.20852	2.99041e-14	AT1G66080	At1g66080 [Source:UniProtKB/TrEMBL;Acc:Q9C8D7]
-1.20786	2.07942e-06	AT4G13000	AGC (cAMP-dependent, cGMP-dependent and protein kinase C) kinase family protein [Source:UniProtKB/TrEMBL;Acc:Q9SV69]
-1.20777	1.97326e-16	AT5G06960	TGA5 [Source:UniProtKB/TrEMBL;Acc:A0A178UIF0]
-1.2074	3.25236e-09	AT3G28850	Uncharacterized protein At3g28850 [Source:UniProtKB/Swiss-Prot;Acc:Q9LH89]
-1.20693	2.38235e-25	AT1G32700	PLATZ transcription factor family protein [Source:UniProtKB/TrEMBL;Acc:F4IEB6]
-1.20689	4.45194e-22	AT4G23270	cysteine-rich RLK (RECEPTOR-like protein kinase) 19 [Source:TAIR;Acc:AT4G23270]
-1.20671	0.000549048	AT2G42510	FUNCTIONS IN: molecular_function unknown; INVOLVED IN: spliceosome assembly, nuclear mRNA splicing, via spliceosome; LOCATED IN: cellular_component unknown; CONTAINS InterPro DOMAIN/s: Survival motor neuron interacting protein 1 (InterPro:IPR007022) /.../ Arabidopsis thaliana protein match is: spliceosome protein-related (TAIR:AT1G54380.1); Has 358 Blast hits to 335 proteins in 89 species: Archae…
-1.20607	0.0042153	AT2G32210	Cysteine-rich/transmembrane domain A-like protein [Source:UniProtKB/TrEMBL;Acc:Q9SKX9]
-1.20543	6.26796e-27	AT5G61190	putative endonuclease or glycosyl hydrolase with C2H2-type zinc finger domain [Source:TAIR;Acc:AT5G61190]
-1.20505	1.95735e-14	AT1G80130	F18B13.21 protein [Source:UniProtKB/TrEMBL;Acc:Q9SSC6]
-1.20487	2.92587e-27	AT4G26400	AT4G26400 protein [Source:UniProtKB/TrEMBL;Acc:Q8L5Z3]
-1.20436	0.0289615	AT1G16150	Wall-associated receptor kinase-like 4 [Source:UniProtKB/Swiss-Prot;Acc:Q9S9M2]
-1.20384	8.19743e-10	AT3G50810	CASP-like protein 5C2 [Source:UniProtKB/Swiss-Prot;Acc:P0CB17]
-1.20224	3.43288e-11	AT1G11300	G-type lectin S-receptor-like serine/threonine-protein kinase At1g11300 [Source:UniProtKB/Swiss-Prot;Acc:Q9SXB4]
-1.20168	2.08281e-16	AT2G17290	Calcium-dependent protein kinase 6 [Source:UniProtKB/Swiss-Prot;Acc:Q38872]
-1.20163	9.28274e-17	AT1G74280	Alpha/beta-Hydrolases superfamily protein [Source:UniProtKB/TrEMBL;Acc:Q9C913]
-1.2002	0.0025183	AT3G04854	unknown protein; LOCATED IN: endomembrane system; Has 30201 Blast hits to 17322 proteins in 780 species: Archae - 12; Bacteria - 1396; Metazoa - 17338; Fungi - 3422; Plants - 5037; Viruses - 0; Other Eukaryotes - 2996 (source: NCBI BLink). [Source:TAIR;Acc:AT3G04854]
-1.19813	1.14407e-08	AT5G22250	Probable CCR4-associated factor 1 homolog 11 [Source:UniProtKB/Swiss-Prot;Acc:Q9FMS6]
-1.19723	1.92824e-29	AT3G55610	Delta-1-pyrroline-5-carboxylate synthase [Source:UniProtKB/TrEMBL;Acc:A0A178VF78]
-1.19454	3.21813e-18	AT4G28270	E3 ubiquitin-protein ligase RMA2 [Source:UniProtKB/Swiss-Prot;Acc:P93030]
-1.19331	1.95561e-13	AT5G66790	Wall-associated receptor kinase-like 21 [Source:UniProtKB/Swiss-Prot;Acc:Q8GYF5]
-1.1929	1.49111e-09	AT1G11210	At1g11210 [Source:UniProtKB/TrEMBL;Acc:Q9SXA7]
-1.19284	4.75998e-14	AT2G29070	At2g29070 [Source:UniProtKB/TrEMBL;Acc:Q6NLS0]
-1.19068	0.00476939	AT3G50260	Ethylene-responsive transcription factor ERF011 [Source:UniProtKB/Swiss-Prot;Acc:Q9SNE1]
-1.19002	0.000232639	AT1G21550	Probable calcium-binding protein CML44 [Source:UniProtKB/Swiss-Prot;Acc:Q9LPK5]
-1.18963	4.74938e-05	AT3G14440	9-cis-epoxycarotenoid dioxygenase NCED3, chloroplastic [Source:UniProtKB/Swiss-Prot;Acc:Q9LRR7]
-1.18903	0.0200528	AT1G60095	Mannose-binding lectin superfamily protein [Source:TAIR;Acc:AT1G60095]
-1.18889	6.28571e-21	AT4G33360	NAD(P)-binding Rossmann-fold superfamily protein [Source:UniProtKB/TrEMBL;Acc:Q9SZB3]
-1.18869	2.17281e-06	AT4G33985	Membrane insertase, putative (DUF1685) [Source:UniProtKB/TrEMBL;Acc:Q0WS40]
-1.18613	1.594e-34	AT3G17410	Protein kinase superfamily protein [Source:UniProtKB/TrEMBL;Acc:Q9LUT0]
-1.18553	4.71574e-30	AT2G16600	Peptidyl-prolyl cis-trans isomerase [Source:UniProtKB/TrEMBL;Acc:A0A178VVJ7]
-1.18538	5.70162e-33	AT1G56460	HIT zinc finger and PAPA-1-like domain-containing protein [Source:UniProtKB/TrEMBL;Acc:Q9C7X2]
-1.18311	6.3244e-28	AT2G29400	Serine/threonine-protein phosphatase [Source:UniProtKB/TrEMBL;Acc:A0A178VXL8]
-1.1815	2.55682e-20	AT2G36330	CASP-like protein 4A3 [Source:UniProtKB/Swiss-Prot;Acc:Q84WP5]
-1.18142	1.44778e-27	AT2G23450	Wall-associated receptor kinase-like 14 [Source:UniProtKB/Swiss-Prot;Acc:Q8RY67]
-1.18124	7.08158e-15	AT5G56340	RING/U-box superfamily protein [Source:UniProtKB/TrEMBL;Acc:Q9FM98]
-1.18124	3.53995e-20	AT1G43130	LCV2 [Source:UniProtKB/TrEMBL;Acc:A0A178WDP4]
-1.18099	6.24488e-05	AT1G24470	Very-long-chain 3-oxoacyl-CoA reductase-like protein At1g24470 [Source:UniProtKB/Swiss-Prot;Acc:Q9FYL6]
-1.18084	4.69014e-12	AT3G28950	Protein AIG2 C [Source:UniProtKB/Swiss-Prot;Acc:Q9MBH1]
-1.18031	1.14434e-21	AT1G76955	At1g76955 [Source:UniProtKB/TrEMBL;Acc:Q0V819]
-1.17948	4.70493e-22	AT1G59960	NAD(P)-linked oxidoreductase superfamily protein [Source:UniProtKB/TrEMBL;Acc:Q9SXC0]
-1.17916	2.22493e-19	AT2G36360	Galactose oxidase/kelch repeat superfamily protein [Source:TAIR;Acc:AT2G36360]
-1.17874	1.68652e-22	AT5G18370	Disease resistance-like protein DSC2 [Source:UniProtKB/Swiss-Prot;Acc:F4JWM0]
-1.17834	0.03353	AT5G03890	Emb [Source:UniProtKB/TrEMBL;Acc:Q9LZC0]
-1.17801	1.29568e-39	AT5G22060	At5g22060 [Source:UniProtKB/TrEMBL;Acc:Q0V7U1]
-1.17779	0.0422056	AT4G06115	-
-1.17427	4.89562e-30	AT5G43100	Eukaryotic aspartyl protease family protein [Source:UniProtKB/TrEMBL;Acc:F4K4L3]
-1.17402	1.80621e-28	AT4G34135	UDP-glucosyl transferase 73B2 [Source:UniProtKB/Swiss-Prot;Acc:Q94C57]
-1.17378	1.02125e-16	AT4G26550	Vesicle transport protein [Source:UniProtKB/TrEMBL;Acc:A0A178UYE8]
-1.17316	1.55308e-10	AT3G26115	D-cysteine desulfhydrase 2, mitochondrial [Source:UniProtKB/Swiss-Prot;Acc:A1L4V7]
-1.17133	2.42863e-24	AT3G45040	Dolichol kinase EVAN [Source:UniProtKB/Swiss-Prot;Acc:F4J4C8]
-1.17045	7.6244e-21	AT3G60800	S-acyltransferase [Source:UniProtKB/TrEMBL;Acc:A0A178VIL0]
-1.17014	6.29299e-31	AT5G53330	Proline-rich cell wall protein-like [Source:UniProtKB/TrEMBL;Acc:Q8LG11]
-1.1696	3.25394e-08	AT1G29720	Probable LRR receptor-like serine/threonine-protein kinase At1g29720 [Source:UniProtKB/Swiss-Prot;Acc:Q9ASQ6]
-1.16799	2.41345e-12	AT3G15770	AT3G15770 protein [Source:UniProtKB/TrEMBL;Acc:B9DGF6]
-1.16642	2.57221e-27	AT1G32210	Dolichyl-diphosphooligosaccharide--protein glycosyltransferase subunit DAD1 [Source:UniProtKB/Swiss-Prot;Acc:Q39080]
-1.16634	1.17224e-14	AT1G67060	AT1G67060 protein [Source:UniProtKB/TrEMBL;Acc:A0JQ16]
-1.16389	3.47887e-21	AT5G60590	DHBP synthase RibB-like alpha/beta domain-containing protein [Source:UniProtKB/TrEMBL;Acc:F4K0E6]
-1.1635	0.0423836	AT2G28210	ATACA2 [Source:UniProtKB/TrEMBL;Acc:A0A178VW72]
-1.16321	2.61323e-17	AT5G41180	Leucine-rich repeat receptor-like protein kinase [Source:UniProtKB/TrEMBL;Acc:Q9FLL2]
-1.16289	7.92903e-06	AT4G39955	Alpha/beta-Hydrolases superfamily protein [Source:UniProtKB/TrEMBL;Acc:Q058J1]
-1.16245	4.81789e-23	AT3G17810	PYD1 [Source:UniProtKB/TrEMBL;Acc:A0A178VD08]
-1.16202	4.25245e-17	AT1G70810	Protein C2-DOMAIN ABA-RELATED 7 [Source:UniProtKB/Swiss-Prot;Acc:Q9SSL1]
-1.16195	4.76932e-17	AT2G05940	Serine/threonine-protein kinase RIPK [Source:UniProtKB/Swiss-Prot;Acc:Q9ZUF4]
-1.16189	1.8684e-05	AT1G75030	At1g75030 [Source:UniProtKB/TrEMBL;Acc:Q9C9P9]
-1.16074	1.49377e-33	AT1G31280	Protein argonaute 2 [Source:UniProtKB/Swiss-Prot;Acc:Q9SHF3]
-1.1605	2.62246e-18	AT3G15355	Probable ubiquitin-conjugating enzyme E2 25 [Source:UniProtKB/Swiss-Prot;Acc:Q9LUQ5]
-1.15976	6.49571e-14	AT1G66590	Cytochrome c oxidase 19-1 [Source:UniProtKB/TrEMBL;Acc:F4IEX1]
-1.15863	4.55815e-07	AT1G01640	BTB/POZ domain-containing protein At1g01640 [Source:UniProtKB/Swiss-Prot;Acc:Q9LQ95]
-1.15852	5.0719e-15	AT1G09560	Germin-like protein subfamily 2 member 1 [Source:UniProtKB/Swiss-Prot;Acc:P94014]
-1.15846	3.41463e-33	AT1G55210	Dirigent protein 20 [Source:UniProtKB/Swiss-Prot;Acc:Q9C891]
-1.1583	1.28666e-05	AT5G42010	Similarity to unknown protein [Source:UniProtKB/TrEMBL;Acc:Q9FHY2]
-1.1568	2.41069e-26	AT2G01650	Plant UBX domain-containing protein 2 [Source:UniProtKB/Swiss-Prot;Acc:Q9ZU93]
-1.15641	2.25886e-27	AT5G19750	Peroxisomal membrane 22 kDa (Mpv17/PMP22) family protein [Source:UniProtKB/TrEMBL;Acc:F4K2L8]
-1.15463	1.99868e-19	AT4G36040	At4g36040 [Source:UniProtKB/TrEMBL;Acc:Q1H544]
-1.15234	2.05621e-24	AT5G51570	Hypersensitive-induced response protein 4 [Source:UniProtKB/Swiss-Prot;Acc:Q9FHM7]
-1.15192	1.69564e-14	AT1G65490	unknown protein; FUNCTIONS IN: molecular_function unknown; INVOLVED IN: biological_process unknown; LOCATED IN: endomembrane system; EXPRESSED IN: 22 plant structures; EXPRESSED DURING: 13 growth stages; BEST Arabidopsis thaliana protein match is: u /.../ protein (TAIR:AT1G65486.1); Has 23 Blast hits to 23 proteins in 2 species: Archae - 0; Bacteria - 0; Metazoa - 0; Fungi - 0; Plants - 23; Virus…
-1.15124	0.0101586	AT1G77765	unknown protein; Has 8 Blast hits to 8 proteins in 2 species: Archae - 0; Bacteria - 0; Metazoa - 0; Fungi - 0; Plants - 8; Viruses - 0; Other Eukaryotes - 0 (source: NCBI BLink). [Source:TAIR;Acc:AT1G77765]
-1.1509	1.37207e-14	AT1G61170	At1g61170 [Source:UniProtKB/TrEMBL;Acc:O22729]
-1.14979	2.41069e-26	AT4G28710	Myosin-14 [Source:UniProtKB/Swiss-Prot;Acc:F4JM19]
-1.14948	1.33459e-30	AT1G21900	Transmembrane emp24 domain-containing protein p24delta5 [Source:UniProtKB/Swiss-Prot;Acc:Q8RWM6]
-1.14765	0.00720317	AT5G59550	zinc finger (C3HC4-type RING finger) family protein [Source:TAIR;Acc:AT5G59550]
-1.1466	1.62416e-22	AT1G18890	Calcium-dependent protein kinase 10 [Source:UniProtKB/Swiss-Prot;Acc:Q9M9V8]
-1.14533	2.84868e-27	AT4G38790	ER lumen protein retaining receptor family protein [Source:UniProtKB/TrEMBL;Acc:Q8LD89]
-1.14485	5.14497e-08	AT2G20560	At2g20560/T13C7.15 [Source:UniProtKB/TrEMBL;Acc:Q9SIL3]
-1.14278	4.79889e-20	AT1G65040	ERAD-associated E3 ubiquitin-protein ligase HRD1B [Source:UniProtKB/Swiss-Prot;Acc:Q6NPT7]
-1.14258	2.50961e-26	AT4G16860	Disease resistance protein RPP4 [Source:UniProtKB/Swiss-Prot;Acc:F4JNA9]
-1.14212	0.000201946	AT5G64800	CLAVATA3/ESR (CLE)-related protein 21 [Source:UniProtKB/Swiss-Prot;Acc:Q9LV97]
-1.14202	0.00063279	AT3G50140	Transmembrane protein, putative (DUF247) [Source:UniProtKB/TrEMBL;Acc:F4IZB4]
-1.1407	5.6138e-18	AT5G38630	Probable transmembrane ascorbate ferrireductase 2 [Source:UniProtKB/Swiss-Prot;Acc:Q9SWS1]
-1.14	1.52387e-22	AT2G44420	protein N-terminal asparagine amidohydrolase family protein [Source:TAIR;Acc:AT2G44420]
-1.1386	0.0161005	AT4G11280	1-aminocyclopropane-1-carboxylate synthase 6 [Source:UniProtKB/Swiss-Prot;Acc:Q9SAR0]
-1.13793	3.12628e-11	AT5G58670	Phosphoinositide phospholipase C 1 [Source:UniProtKB/Swiss-Prot;Acc:Q39032]
-1.13771	8.24337e-25	AT5G11030	Aberrant root formation protein 4 [Source:UniProtKB/Swiss-Prot;Acc:Q84VX3]
-1.13692	3.35193e-16	AT4G16430	Transcription factor bHLH3 [Source:UniProtKB/Swiss-Prot;Acc:O23487]
-1.13602	1.39201e-06	AT5G62820	CASP-like protein [Source:UniProtKB/TrEMBL;Acc:A0A178U8F8]
-1.13579	3.95849e-25	AT2G17790	Vacuolar protein sorting-associated protein 35A [Source:UniProtKB/Swiss-Prot;Acc:Q7X659]
-1.13414	8.00215e-24	AT1G02270	Uncharacterized calcium-binding protein At1g02270 [Source:UniProtKB/Swiss-Prot;Acc:O81916]
-1.13315	8.18559e-20	AT3G57280	Protein FATTY ACID EXPORT 1, chloroplastic [Source:UniProtKB/Swiss-Prot;Acc:Q93V66]
-1.13189	1.80269e-20	AT5G58220	Uric acid degradation bifunctional protein TTL [Source:UniProtKB/Swiss-Prot;Acc:Q9LVM5]
-1.13033	6.54423e-17	AT3G54850	U-box domain-containing protein 14 [Source:UniProtKB/Swiss-Prot;Acc:Q8VZ40]
-1.12902	3.57747e-11	AT5G57910	At5g57910 [Source:UniProtKB/TrEMBL;Acc:Q8GW24]
-1.12868	2.56317e-28	AT1G09210	Calreticulin-2 [Source:UniProtKB/Swiss-Prot;Acc:Q38858]
-1.12843	0.000150864	AT1G64065	Late embryogenesis abundant protein At1g64065 [Source:UniProtKB/Swiss-Prot;Acc:Q6DST1]
-1.12801	1.80157e-14	AT1G74300	Alpha/beta-Hydrolases superfamily protein [Source:UniProtKB/TrEMBL;Acc:Q9C915]
-1.12786	6.40374e-11	AT3G07570	Cytochrome b561 and DOMON domain-containing protein At3g07570 [Source:UniProtKB/Swiss-Prot;Acc:Q0WRW8]
-1.1278	6.53531e-24	AT3G20250	PUM5 [Source:UniProtKB/TrEMBL;Acc:A0A1I9LRW8]
-1.12762	1.28233e-31	AT2G33730	DEAD-box ATP-dependent RNA helicase 21 [Source:UniProtKB/Swiss-Prot;Acc:P93008]
-1.12755	3.41653e-22	AT5G24810	ABC1 family protein [Source:UniProtKB/TrEMBL;Acc:F4KIJ2]
-1.12724	2.7382e-26	AT3G42790	AL3 [Source:UniProtKB/TrEMBL;Acc:A0A178VCG6]
-1.12691	0.0181536	AT4G02360	T14P8.17 [Source:UniProtKB/TrEMBL;Acc:O81297]
-1.12553	0.000202362	AT5G01640	PRA1 family protein [Source:UniProtKB/TrEMBL;Acc:A0A178UH31]
-1.12511	8.84987e-14	AT4G17070	AT4g17070/dl4565c [Source:UniProtKB/TrEMBL;Acc:Q93ZN3]
-1.1242	7.98742e-13	AT2G20780	Probable polyol transporter 4 [Source:UniProtKB/Swiss-Prot;Acc:Q0WUU6]
-1.12367	5.8339e-30	AT3G60440	Phosphoglycerate mutase family protein [Source:UniProtKB/TrEMBL;Acc:F4JBU0]
-1.12315	2.42863e-24	AT2G45910	U-box domain-containing protein 33 [Source:UniProtKB/Swiss-Prot;Acc:Q8GUH1]
-1.12249	7.98257e-19	AT5G07360	Amidase family protein [Source:UniProtKB/TrEMBL;Acc:F4K6N3]
-1.12027	1.50484e-26	AT2G01670	Nudix hydrolase 17, mitochondrial [Source:UniProtKB/Swiss-Prot;Acc:Q9ZU95]
-1.11979	1.89454e-32	AT3G61960	Serine/threonine-protein kinase ATG1a [Source:UniProtKB/Swiss-Prot;Acc:Q94C95]
-1.11914	1.91174e-21	AT1G67800	Copine (Calcium-dependent phospholipid-binding protein) family [Source:UniProtKB/TrEMBL;Acc:F4HTR6]
-1.11718	8.58668e-17	AT1G30640	Non-specific serine/threonine protein kinase [Source:UniProtKB/TrEMBL;Acc:A0A178WHD9]
-1.11677	4.34311e-18	AT5G07790	Gb [Source:UniProtKB/TrEMBL;Acc:Q9FF13]
-1.11668	2.55415e-33	AT5G16880	TOM1-like protein 1 [Source:UniProtKB/Swiss-Prot;Acc:Q9LFL3]
-1.11602	0.0111196	AT4G00955	FUNCTIONS IN: molecular_function unknown; INVOLVED IN: biological_process unknown; LOCATED IN: endomembrane system; EXPRESSED IN: 14 plant structures; EXPRESSED DURING: 9 growth stages; CONTAINS InterPro DOMAIN/s: EGF-like (InterPro:IPR006210); BEST /.../dopsis thaliana protein match is: Protein kinase superfamily protein (TAIR:AT2G23450.1); Has 94 Blast hits to 88 proteins in 13 species: Archae …
-1.11548	0.024885	AT1G61470	Probable CCR4-associated factor 1 homolog 5 [Source:UniProtKB/Swiss-Prot;Acc:O64773]
-1.11538	7.07901e-08	AT3G27540	Beta-1,4-N-acetylglucosaminyltransferase family protein [Source:UniProtKB/TrEMBL;Acc:Q9LT58]
-1.11529	7.27986e-28	AT5G61790	Calnexin homolog 1 [Source:UniProtKB/Swiss-Prot;Acc:P29402]
-1.11499	8.77649e-11	AT5G09690	magnesium transporter 7 [Source:TAIR;Acc:AT5G09690]
-1.11493	2.58069e-15	AT3G20270	Lipid-binding serum glycoprotein family protein [Source:UniProtKB/TrEMBL;Acc:F4JDK0]
-1.11431	7.65667e-23	AT3G50920	Lipid phosphate phosphatase epsilon 1, chloroplastic [Source:UniProtKB/Swiss-Prot;Acc:F4J220]
-1.11393	4.45535e-31	AT3G44670	Disease resistance protein (TIR-NBS-LRR class) family [Source:UniProtKB/TrEMBL;Acc:F4J361]
-1.11327	1.52625e-23	AT2G41490	GPT [Source:UniProtKB/TrEMBL;Acc:A0A178VV44]
-1.11266	5.05077e-19	AT1G30000	alpha-mannosidase 3 [Source:TAIR;Acc:AT1G30000]
-1.11222	2.44197e-11	AT2G04620	Metal tolerance protein 12 [Source:UniProtKB/TrEMBL;Acc:A0A0A8IL98]
-1.11217	2.93659e-16	AT2G22480	ATP-dependent 6-phosphofructokinase 5, chloroplastic [Source:UniProtKB/Swiss-Prot;Acc:Q8VYN6]
-1.11139	0.039648	AT2G41640	At2g41640/T32G6.16 [Source:UniProtKB/TrEMBL;Acc:O22225]
-1.11138	2.82824e-19	AT1G08930	ERD6 [Source:UniProtKB/TrEMBL;Acc:A0A178W9Q9]
-1.11073	1.2352e-39	AT4G11260	SGT1B [Source:UniProtKB/TrEMBL;Acc:A0A178UX37]
-1.11054	3.75264e-09	AT5G07130	Laccase-13 [Source:UniProtKB/Swiss-Prot;Acc:Q9LYQ2]
-1.11006	2.04152e-27	AT1G11310	MLO-like protein [Source:UniProtKB/TrEMBL;Acc:A0A178WQL2]
-1.10954	4.68834e-07	AT2G04430	Nudix hydrolase 5 [Source:UniProtKB/Swiss-Prot;Acc:Q9SJC6]
-1.10954	4.47427e-14	AT1G80510	Amino acid transporter AVT6E [Source:UniProtKB/Swiss-Prot;Acc:Q9M8L9]
-1.10911	7.42699e-11	AT5G66620	Protein DA1-related 6 [Source:UniProtKB/Swiss-Prot;Acc:Q9FJX8]
-1.10871	0.0105841	AT5G65300	Uncharacterized protein At5g65300 [Source:UniProtKB/TrEMBL;Acc:Q9FKQ7]
-1.10863	2.64479e-08	AT4G19370	Chitin synthase, putative (DUF1218) [Source:UniProtKB/TrEMBL;Acc:O65708]
-1.10848	8.65332e-23	AT2G13650	GDP-mannose transporter (Fragment) [Source:UniProtKB/TrEMBL;Acc:A0A1B0VP09]
-1.10796	1.68442e-15	AT4G31600	UDP-galactose/UDP-glucose transporter 7 [Source:UniProtKB/Swiss-Prot;Acc:Q94B65]
-1.10686	3.22617e-21	AT3G45640	Mitogen-activated protein kinase [Source:UniProtKB/TrEMBL;Acc:Q0WVS7]
-1.10677	1.2367e-16	AT3G21810	Zinc finger CCCH domain-containing protein 40 [Source:UniProtKB/Swiss-Prot;Acc:Q93XW7]
-1.1061	1.1343e-17	AT5G17060	ADP-ribosylation factor B1B [Source:UniProtKB/TrEMBL;Acc:Q9LFJ7]
-1.10536	4.04487e-32	AT4G01370	Mitogen-activated protein kinase 4 [Source:UniProtKB/Swiss-Prot;Acc:Q39024]
-1.10488	4.99604e-22	AT5G61060	Histone deacetylase [Source:UniProtKB/TrEMBL;Acc:F4K1Z5]
-1.10471	2.60979e-05	AT4G20460	Probable UDP-arabinose 4-epimerase 3 [Source:UniProtKB/Swiss-Prot;Acc:Q9SUN3]
-1.10259	1.74231e-21	AT1G59580	Mitogen-activated protein kinase [Source:UniProtKB/TrEMBL;Acc:A0A178WBY0]
-1.10251	2.40468e-08	AT4G01840	Two-pore potassium channel 5 [Source:UniProtKB/Swiss-Prot;Acc:Q9S6Z8]
-1.1024	4.24583e-13	AT1G49130	B-box type zinc finger protein with CCT domain-containing protein [Source:UniProtKB/TrEMBL;Acc:F4I1N0]
-1.10229	9.34294e-05	AT2G01818	PLATZ transcription factor family protein [Source:UniProtKB/TrEMBL;Acc:A8MQN6]
-1.10221	3.47884e-27	AT2G14720	Vacuolar-sorting receptor 4 [Source:UniProtKB/Swiss-Prot;Acc:Q56ZQ3]
-1.10081	1.94596e-12	AT4G22780	ACT domain-containing protein ACR7 [Source:UniProtKB/Swiss-Prot;Acc:Q8LJW1]
-1.10053	1.04575e-24	AT1G03430	histidine-containing phosphotransfer factor 5 [Source:TAIR;Acc:AT1G03430]
-1.10008	1.99084e-23	AT3G14840	Probable leucine-rich repeat receptor-like serine/threonine-protein kinase At3g14840 [Source:UniProtKB/Swiss-Prot;Acc:C0LGN2]
-1.10001	6.03247e-15	AT2G42890	ML2 [Source:UniProtKB/TrEMBL;Acc:A0A178VQK0]
-1.09954	1.48795e-10	AT1G62730	At1g62730 [Source:UniProtKB/TrEMBL;Acc:Q9SI77]
-1.099	1.18093e-30	AT3G23280	Putative E3 ubiquitin-protein ligase XBAT35 [Source:UniProtKB/Swiss-Prot;Acc:Q4FE47]
-1.09873	0.0314537	AT1G10980	Expressed protein [Source:UniProtKB/TrEMBL;Acc:O04088]
-1.09824	0.00193071	AT5G11970	ABC family ABC transporter, putative (DUF3511) [Source:UniProtKB/TrEMBL;Acc:Q9LYH6]
-1.09791	0.00108173	AT2G32190	Cysteine-rich/transmembrane domain A-like protein [Source:UniProtKB/TrEMBL;Acc:Q9SKY1]
-1.09733	1.71462e-10	AT1G68050	FKF1 [Source:UniProtKB/TrEMBL;Acc:A0A178W8F6]
-1.09651	2.62063e-32	AT2G47470	UNE5 [Source:UniProtKB/TrEMBL;Acc:A0A178W1F8]
-1.09638	2.00327e-11	AT4G30560	Putative cyclic nucleotide-gated ion channel 9 [Source:UniProtKB/Swiss-Prot;Acc:Q9M0A4]
-1.09593	5.88061e-16	AT1G18260	ERAD-associated E3 ubiquitin-protein ligase component HRD3A [Source:UniProtKB/Swiss-Prot;Acc:Q9LM25]
-1.09532	4.59159e-23	AT3G49390	Polyadenylate-binding protein-interacting protein 10 [Source:UniProtKB/Swiss-Prot;Acc:Q9SG10]
-1.09511	3.46771e-12	AT4G25515	Probable transcriptional regulator SLK3 [Source:UniProtKB/Swiss-Prot;Acc:F4JT98]
-1.09488	5.05198e-06	AT4G35810	Probable prolyl 4-hydroxylase 8 [Source:UniProtKB/Swiss-Prot;Acc:F4JNU8]
-1.09336	4.00835e-25	AT5G64370	Beta-ureidopropionase [Source:UniProtKB/Swiss-Prot;Acc:Q8H183]
-1.09244	7.47742e-23	AT5G62610	Transcription factor bHLH79 [Source:UniProtKB/Swiss-Prot;Acc:Q9LV17]
-1.09207	1.912e-15	AT2G14080	Disease resistance protein (TIR-NBS-LRR class) family [Source:UniProtKB/TrEMBL;Acc:F4IFF6]
-1.09133	2.17227e-18	AT1G78200	Probable protein phosphatase 2C 17 [Source:UniProtKB/Swiss-Prot;Acc:Q8L7I4]
-1.09111	8.92095e-12	AT3G17910	Surfeit locus protein 1 [Source:UniProtKB/Swiss-Prot;Acc:Q9SE51]
-1.09078	7.46894e-27	AT4G03030	F-box/kelch-repeat protein OR23 [Source:UniProtKB/Swiss-Prot;Acc:Q0V7S6]
-1.09042	4.2382e-20	AT2G39740	Protein HESO1 [Source:UniProtKB/Swiss-Prot;Acc:Q5XET5]
-1.09021	2.91693e-17	AT1G23170	Protein of unknown function DUF2359, transmembrane [Source:TAIR;Acc:AT1G23170]
-1.08813	0.0119663	AT3G48850	Mitochondrial phosphate carrier protein 2, mitochondrial [Source:UniProtKB/Swiss-Prot;Acc:Q9M2Z8]
-1.08651	2.22713e-22	AT4G24920	secE/sec61-gamma protein transport protein [Source:TAIR;Acc:AT4G24920]
-1.08612	4.99169e-19	AT3G53670	Uncharacterized protein At3g53670; F4P12.370 [Source:UniProtKB/TrEMBL;Acc:Q9LFF4]
-1.08544	7.30367e-05	AT3G18485	IAA-leucine resistant 2 [Source:UniProtKB/Swiss-Prot;Acc:F4J8R4]
-1.0853	6.16587e-14	AT3G02170	Protein LONGIFOLIA 2 [Source:UniProtKB/Swiss-Prot;Acc:Q9S823]
-1.08415	4.85452e-15	AT1G22180	F16L1.9 protein [Source:UniProtKB/TrEMBL;Acc:Q9LM14]
-1.08372	5.61717e-14	AT5G24980	At5g24980 [Source:UniProtKB/TrEMBL;Acc:Q6NQ43]
-1.08365	1.12712e-09	AT5G18360	Disease resistance protein (TIR-NBS-LRR class) family [Source:UniProtKB/TrEMBL;Acc:F4JWL8]
-1.08344	5.45179e-22	AT5G24240	Phosphatidylinositol 4-kinase gamma 3 [Source:UniProtKB/Swiss-Prot;Acc:Q9FNF8]
-1.08217	2.63798e-17	AT2G17840	Protein EARLY-RESPONSIVE TO DEHYDRATION 7, chloroplastic [Source:UniProtKB/Swiss-Prot;Acc:O48832]
-1.08188	0.00592954	AT3G47840	Putative pentatricopeptide repeat-containing protein At3g47840 [Source:UniProtKB/Swiss-Prot;Acc:Q9STS9]
-1.0812	6.23968e-08	AT3G12040	DNA-3-methyladenine glycosylase [Source:UniProtKB/Swiss-Prot;Acc:Q39147]
-1.07934	2.37392e-19	AT4G02880	unknown protein; BEST Arabidopsis thaliana protein match is: unknown protein (TAIR:AT1G03290.2); Has 30201 Blast hits to 17322 proteins in 780 species: Archae - 12; Bacteria - 1396; Metazoa - 17338; Fungi - 3422; Plants - 5037; Viruses - 0; Other Eu /.../es - 2996 (source: NCBI BLink). [Source:TAIR;Acc:AT4G02880]
-1.07905	3.81608e-24	AT3G52240	Transcriptional regulator ATRX [Source:UniProtKB/TrEMBL;Acc:Q8GYC9]
-1.07786	6.49818e-21	AT5G56260	Ribonuclease E inhibitor RraA/Dimethylmenaquinone methyltransferase [Source:TAIR;Acc:AT5G56260]
-1.07721	0.00010345	AT1G56600	Galactinol synthase 2 [Source:UniProtKB/Swiss-Prot;Acc:Q9FXB2]
-1.07633	1.76781e-06	AT5G16570	Glutamine synthetase [Source:UniProtKB/TrEMBL;Acc:A0A178UB24]
-1.07595	0.000289151	AT5G25790	Tesmin/TSO1-like CXC domain-containing protein [Source:TAIR;Acc:AT5G25790]
-1.0759	2.50538e-16	AT1G17890	Putative GDP-L-fucose synthase 2 [Source:UniProtKB/Swiss-Prot;Acc:Q9LMU0]
-1.07563	3.07848e-21	AT3G07370	CHIP [Source:UniProtKB/TrEMBL;Acc:A0A178VGJ7]
-1.07526	2.11594e-26	AT3G19190	Autophagy-related protein 2 [Source:UniProtKB/Swiss-Prot;Acc:F8S296]
-1.07507	6.21097e-25	AT2G04900	Expressed protein [Source:UniProtKB/TrEMBL;Acc:Q9SI36]
-1.07466	4.76865e-16	AT4G15010	AT4G15010 protein [Source:UniProtKB/TrEMBL;Acc:Q940F4]
-1.07458	5.03413e-23	AT5G08660	D-lactate dehydrogenase (DUF668) [Source:UniProtKB/TrEMBL;Acc:Q9C5B1]
-1.0745	3.34866e-15	AT5G62630	HIPL2 protein [Source:UniProtKB/Swiss-Prot;Acc:Q94F08]
-1.07421	9.27138e-14	AT5G17640	At5g17640 [Source:UniProtKB/TrEMBL;Acc:Q9LF60]
-1.07419	1.16392e-11	AT5G44400	Berberine bridge enzyme-like 26 [Source:UniProtKB/Swiss-Prot;Acc:Q9FKU8]
-1.074	2.99498e-37	AT4G16990	disease resistance protein (TIR-NBS class), putative [Source:TAIR;Acc:AT4G16990]
-1.07355	0.00444931	AT5G52300	Low-temperature-induced 65 kDa protein [Source:UniProtKB/Swiss-Prot;Acc:Q04980]
-1.07316	1.52395e-13	AT5G47580	AT5g47580/MNJ7_17 [Source:UniProtKB/TrEMBL;Acc:Q9FGJ9]
-1.07241	2.09495e-05	AT3G06780	F3E22.8 protein [Source:UniProtKB/TrEMBL;Acc:Q9M7Y4]
-1.0724	1.12694e-20	AT4G14220	E3 ubiquitin-protein ligase RHF1A [Source:UniProtKB/Swiss-Prot;Acc:Q4TU14]
-1.07114	1.90638e-14	AT5G66010	RNA-binding (RRM/RBD/RNP motifs) family protein [Source:UniProtKB/TrEMBL;Acc:F4JZ11]
-1.07068	1.33947e-26	AT5G25265	Hydroxyproline O-arabinosyltransferase 1 [Source:UniProtKB/Swiss-Prot;Acc:Q8W4E6]
-1.07001	2.06281e-06	AT1G30860	At1g30860 [Source:UniProtKB/TrEMBL;Acc:Q6NQ80]
-1.06912	1.02493e-14	AT1G11905	B-cell receptor-associated protein 31-like protein [Source:UniProtKB/TrEMBL;Acc:Q8L702]
-1.06906	1.5567e-13	AT5G51630	Disease resistance protein (TIR-NBS-LRR class) family [Source:UniProtKB/TrEMBL;Acc:Q0WPW2]
-1.06901	1.93489e-05	AT1G67520	lectin protein kinase family protein [Source:TAIR;Acc:AT1G67520]
-1.06864	1.79206e-15	AT1G10920	Putative inactive disease susceptibility protein LOV1 [Source:UniProtKB/Swiss-Prot;Acc:O04093]
-1.06764	4.42023e-14	AT1G70740	At1g70740 [Source:UniProtKB/TrEMBL;Acc:B4F7N6]
-1.0674	1.74414e-05	AT4G01200	Calcium-dependent lipid-binding (CaLB domain) family protein [Source:UniProtKB/TrEMBL;Acc:Q9M148]
-1.06728	7.30637e-12	AT1G10210	MPK1 [Source:UniProtKB/TrEMBL;Acc:A0A178W6I4]
-1.0668	0.00367205	AT3G47340	DIN6 [Source:UniProtKB/TrEMBL;Acc:A0A178VBT4]
-1.06533	7.07944e-17	AT1G77420	Alpha/beta-Hydrolases superfamily protein [Source:UniProtKB/TrEMBL;Acc:Q9FVW6]
-1.06501	4.0845e-23	AT2G32520	alpha/beta-Hydrolases superfamily protein [Source:TAIR;Acc:AT2G32520]
-1.06487	6.39641e-30	AT4G31170	AT4G31170 protein [Source:UniProtKB/TrEMBL;Acc:Q9M085]
-1.06465	1.74861e-16	AT1G63460	Probable glutathione peroxidase 8 [Source:UniProtKB/Swiss-Prot;Acc:Q8LBU2]
-1.06366	0.0122494	AT3G49055	Uncharacterized protein At3g49055 [Source:UniProtKB/Swiss-Prot;Acc:Q5XVA8]
-1.06313	6.92232e-25	AT5G22000	RHF2A [Source:UniProtKB/TrEMBL;Acc:A0A178UA98]
-1.06213	2.6601e-07	AT1G74350	-
-1.06186	3.08429e-10	AT1G21390	At1g21390 [Source:UniProtKB/TrEMBL;Acc:Q52K83]
-1.06164	0.0138666	AT5G47960	SMG1 [Source:UniProtKB/TrEMBL;Acc:A0A178UQI5]
-1.06153	1.05169e-14	AT1G31220	Phosphoribosylglycinamide formyltransferase, chloroplastic [Source:UniProtKB/Swiss-Prot;Acc:P52422]
-1.06127	1.83048e-15	AT5G04170	Probable calcium-binding protein CML50 [Source:UniProtKB/Swiss-Prot;Acc:Q9FYE4]
-1.06109	2.5249e-21	AT3G05970	Long chain acyl-CoA synthetase 6, peroxisomal [Source:UniProtKB/Swiss-Prot;Acc:Q8LPS1]
-1.0607	1.39436e-10	AT3G47570	Probable LRR receptor-like serine/threonine-protein kinase At3g47570 [Source:UniProtKB/Swiss-Prot;Acc:C0LGP4]
-1.06054	0.00242807	AT4G22475	Transmembrane protein [Source:UniProtKB/TrEMBL;Acc:A0A1P8B5W2]
-1.0604	1.08652e-07	AT3G56030	Pentatricopeptide repeat-containing protein At3g56030, mitochondrial [Source:UniProtKB/Swiss-Prot;Acc:Q9LY43]
-1.06035	0.000595786	AT1G04540	Calcium-dependent lipid-binding (CaLB domain) family protein [Source:UniProtKB/TrEMBL;Acc:F4I5P7]
-1.05979	9.14479e-11	AT2G25300	Hydroxyproline O-galactosyltransferase HPGT3 [Source:UniProtKB/Swiss-Prot;Acc:Q5XEZ1]
-1.05978	0.0141848	AT4G11550	Cysteine/Histidine-rich C1 domain family protein [Source:UniProtKB/TrEMBL;Acc:Q9LDV7]
-1.0595	0.0488129	AT3G49860	ADP-ribosylation factor-like protein 8d [Source:UniProtKB/Swiss-Prot;Acc:F4IZ82]
-1.05762	1.13223e-07	AT1G25370	Putative uncharacterized protein [Source:UniProtKB/TrEMBL;Acc:Q8LFI6]
-1.05664	1.15408e-10	AT2G41440	unknown protein; BEST Arabidopsis thaliana protein match is: unknown protein (TAIR:AT2G41470.1); Has 30201 Blast hits to 17322 proteins in 780 species: Archae - 12; Bacteria - 1396; Metazoa - 17338; Fungi - 3422; Plants - 5037; Viruses - 0; Other Eu /.../es - 2996 (source: NCBI BLink). [Source:TAIR;Acc:AT2G41440]
-1.05641	1.37506e-17	AT3G09735	DNA-binding protein S1FA3 [Source:UniProtKB/Swiss-Prot;Acc:Q93VI0]
-1.05571	3.13314e-11	AT5G54720	Ankyrin repeat family protein [Source:UniProtKB/TrEMBL;Acc:Q9FH33]
-1.0556	2.50302e-28	AT3G58640	AT3g58640/F14P22_230 [Source:UniProtKB/TrEMBL;Acc:Q94AB2]
-1.05486	1.02809e-22	AT1G07650	Leucine-rich repeat transmembrane protein kinase [Source:UniProtKB/TrEMBL;Acc:F4HSE1]
-1.05484	3.31846e-12	AT3G13430	RING/U-box superfamily protein [Source:UniProtKB/TrEMBL;Acc:Q9LJE9]
-1.05415	3.92367e-34	AT3G11660	NDR1/HIN1-like protein 1 [Source:UniProtKB/Swiss-Prot;Acc:Q9SRN0]
-1.05341	6.31901e-13	AT5G56660	At5g56660 [Source:UniProtKB/TrEMBL;Acc:Q5HZ30]
-1.05286	1.56621e-17	AT5G23490	unknown protein; BEST Arabidopsis thaliana protein match is: unknown protein (TAIR:AT5G08440.1); Has 202 Blast hits to 197 proteins in 48 species: Archae - 0; Bacteria - 13; Metazoa - 25; Fungi - 9; Plants - 109; Viruses - 0; Other Eukaryotes - 46 ( /.../: NCBI BLink). [Source:TAIR;Acc:AT5G23490]
-1.05237	7.41894e-10	AT4G05590	CONTAINS InterPro DOMAIN/s: Uncharacterised protein family UPF0041 (InterPro:IPR005336); BEST Arabidopsis thaliana protein match is: Uncharacterised protein family (UPF0041) (TAIR:AT4G22310.1); Has 30201 Blast hits to 17322 proteins in 780 species: /.../ - 12; Bacteria - 1396; Metazoa - 17338; Fungi - 3422; Plants - 5037; Viruses - 0; Other Eukaryotes - 2996 (source: NCBI BLink). [Source:TAIR;Acc…
-1.05217	5.29089e-22	AT5G18310	AT5G18310 protein [Source:UniProtKB/TrEMBL;Acc:B9DGJ0]
-1.05195	0.0152281	AT1G69270	Probable LRR receptor-like serine/threonine-protein kinase RPK1 [Source:UniProtKB/Swiss-Prot;Acc:Q9ZRF9]
-1.05193	4.20641e-21	AT4G37820	Transmembrane protein [Source:UniProtKB/TrEMBL;Acc:Q9T069]
-1.0516	1.62783e-20	AT5G45510	Probable disease resistance protein At5g45510 [Source:UniProtKB/Swiss-Prot;Acc:Q8VZC7]
-1.05148	8.6085e-12	AT3G03610	ELMO/CED-12 family protein [Source:UniProtKB/TrEMBL;Acc:A0A1I9LNB6]
-1.05102	1.38251e-09	AT2G33845	Expressed protein [Source:UniProtKB/TrEMBL;Acc:Q8RYC3]
-1.05098	1.7058e-12	AT4G17230	SCARECROW-like 13 [Source:TAIR;Acc:AT4G17230]
-1.05096	7.93976e-23	AT2G17200	Ubiquitin domain-containing protein DSK2b [Source:UniProtKB/Swiss-Prot;Acc:Q9SII8]
-1.05033	1.66401e-06	AT4G15975	RING/U-box superfamily protein [Source:TAIR;Acc:AT4G15975]
-1.05004	6.49958e-15	AT2G44500	O-fucosyltransferase 20 [Source:UniProtKB/Swiss-Prot;Acc:O64884]
-1.04992	1.03621e-19	AT1G59870	ABC transporter G family member 36 [Source:UniProtKB/Swiss-Prot;Acc:Q9XIE2]
-1.04986	1.041e-31	AT3G18370	AT3g18370/MYF24_8 [Source:UniProtKB/TrEMBL;Acc:Q93ZM0]
-1.04986	1.29254e-06	AT2G44080	ARGOS-like protein [Source:UniProtKB/Swiss-Prot;Acc:Q8RXL7]
-1.04985	0.0359261	AT5G39865	Uncharacterized protein At5g39865 [Source:UniProtKB/Swiss-Prot;Acc:Q9FLE8]
-1.0491	1.19967e-12	AT4G09460	Transcription repressor MYB6 [Source:UniProtKB/Swiss-Prot;Acc:Q38851]
-1.04878	0.00409375	AT4G21500	At4g21500 [Source:UniProtKB/TrEMBL;Acc:O65415]
-1.04798	4.19326e-23	AT3G46510	U-box domain-containing protein 13 [Source:UniProtKB/Swiss-Prot;Acc:Q9SNC6]
-1.04731	0.0236931	AT1G72960	Protein ROOT HAIR DEFECTIVE 3 homolog 1 [Source:UniProtKB/Swiss-Prot;Acc:Q9SSN0]
-1.04719	3.14086e-06	AT4G37530	Peroxidase 51 [Source:UniProtKB/Swiss-Prot;Acc:Q9SZE7]
-1.04711	1.79632e-18	AT1G27350	At1g27330 [Source:UniProtKB/TrEMBL;Acc:Q84K46]
-1.04681	8.52685e-06	AT5G25970	Core-2/I-branching beta-1,6-N-acetylglucosaminyltransferase family protein [Source:UniProtKB/TrEMBL;Acc:Q1PDT4]
-1.04677	9.31424e-26	AT3G12740	ALA-interacting subunit 1 [Source:UniProtKB/Swiss-Prot;Acc:Q9LTW0]
-1.04645	4.1976e-25	AT5G53130	Cyclic nucleotide-gated ion channel 1 [Source:UniProtKB/Swiss-Prot;Acc:O65717]
-1.04616	6.43117e-06	AT2G31990	Exostosin family protein [Source:TAIR;Acc:AT2G31990]
-1.0461	0.00081508	AT5G19490	Histone superfamily protein [Source:UniProtKB/TrEMBL;Acc:F4K162]
-1.04564	8.98019e-14	AT3G06630	Protein kinase family protein [Source:UniProtKB/TrEMBL;Acc:A0A1I9LPU6]
-1.0455	8.80216e-21	AT3G58600	Adaptin ear-binding coat-associated protein 1 NECAP-1 [Source:UniProtKB/TrEMBL;Acc:Q84WV7]
-1.0449	0.00484229	AT1G33790	Jacalin-related lectin 4 [Source:UniProtKB/Swiss-Prot;Acc:Q9LQ31]
-1.0445	5.78689e-20	AT1G29970	60S ribosomal protein L18A-1 [Source:UniProtKB/TrEMBL;Acc:A8MRF3]
-1.04295	0.00267515	AT5G02220	Cyclin-dependent protein kinase inhibitor SMR4 [Source:UniProtKB/Swiss-Prot;Acc:Q1JPP8]
-1.04293	0.00442585	AT5G05410	Dehydration-responsive element-binding protein 2A [Source:UniProtKB/Swiss-Prot;Acc:O82132]
-1.04275	5.96252e-29	AT4G00330	Calmodulin-binding receptor-like cytoplasmic kinase 2 [Source:UniProtKB/Swiss-Prot;Acc:Q8VZJ9]
-1.04202	3.30771e-22	AT1G04530	Tetratricopeptide repeat (TPR)-like superfamily protein [Source:UniProtKB/TrEMBL;Acc:Q8VZ31]
-1.03976	1.15257e-17	AT1G70520	Cysteine-rich receptor-like protein kinase 2 [Source:UniProtKB/Swiss-Prot;Acc:Q9CAL3]
-1.0392	6.14189e-17	AT1G17080	At1g17080/F6I1.24 [Source:UniProtKB/TrEMBL;Acc:Q9SHG7]
-1.03881	5.00744e-20	AT5G45130	RAB homolog 1 [Source:TAIR;Acc:AT5G45130]
-1.03868	2.16207e-13	AT1G55730	Vacuolar cation/proton exchanger 5 [Source:UniProtKB/Swiss-Prot;Acc:Q8L783]
-1.03853	2.79505e-17	AT3G09810	Isocitrate dehydrogenase [NAD] subunit, mitochondrial [Source:UniProtKB/TrEMBL;Acc:A0A178V9M1]
-1.03788	3.35367e-16	AT5G66210	Calcium-dependent protein kinase 28 [Source:UniProtKB/Swiss-Prot;Acc:Q9FKW4]
-1.03623	1.76346e-15	AT3G12300	BUG22 [Source:UniProtKB/TrEMBL;Acc:A0A178VKY4]
-1.03575	0.0001416	AT2G21550	Bifunctional dihydrofolate reductase-thymidylate synthase [Source:UniProtKB/TrEMBL;Acc:Q9SIK4]
-1.0356	9.389e-27	AT3G60190	Dynamin-related protein 1E [Source:UniProtKB/Swiss-Prot;Acc:Q9FNX5]
-1.03525	6.28297e-17	AT5G41400	Putative RING zinc finger protein [Source:UniProtKB/TrEMBL;Acc:Q9FN60]
-1.03519	0.0395255	AT3G01235	-
-1.03504	1.21698e-14	AT3G15580	Autophagy-related protein [Source:UniProtKB/TrEMBL;Acc:A0A178VBL7]
-1.03279	2.47704e-11	AT4G00780	TRAF-like family protein [Source:UniProtKB/TrEMBL;Acc:Q8VZ38]
-1.03208	5.86767e-20	AT5G66675	UPF0496 protein At5g66675 [Source:UniProtKB/Swiss-Prot;Acc:Q8GW16]
-1.03187	1.15423e-21	AT5G54710	Ankyrin repeat family protein [Source:TAIR;Acc:AT5G54710]
-1.03145	6.0386e-09	AT1G68650	GDT1-like protein 5 [Source:UniProtKB/Swiss-Prot;Acc:Q9SX28]
-1.02967	1.7904e-05	AT2G19190	Senescence-induced receptor-like serine/threonine-protein kinase [Source:UniProtKB/Swiss-Prot;Acc:O64483]
-1.02905	4.86102e-16	AT3G03740	BTB/POZ and MATH domain-containing protein 4 [Source:UniProtKB/Swiss-Prot;Acc:Q9SRV1]
-1.02903	9.77267e-07	AT1G08940	Phosphoglycerate mutase-like protein AT74H [Source:UniProtKB/Swiss-Prot;Acc:O04035]
-1.02877	6.02121e-31	AT5G46470	Disease resistance protein RPS6 [Source:UniProtKB/Swiss-Prot;Acc:F4KHH8]
-1.02863	1.07674e-21	AT5G43470	Disease resistance protein RPP8 [Source:UniProtKB/Swiss-Prot;Acc:Q8W4J9]
-1.02847	2.36814e-13	AT1G45150	Alpha-1,6-mannosyl-glycoprotein 2-beta-N-acetylglucosaminyltransferase [Source:UniProtKB/TrEMBL;Acc:Q7Y231]
-1.02783	2.44902e-16	AT1G11303	G-type lectin S-receptor-like serine/threonine-protein kinase At1g11303 [Source:UniProtKB/Swiss-Prot;Acc:Q9SXB5]
-1.02664	9.00524e-08	AT3G06070	At3g06070 [Source:UniProtKB/TrEMBL;Acc:Q8LED7]
-1.02658	2.28334e-24	AT2G34470	Urease accessory protein G [Source:UniProtKB/TrEMBL;Acc:F4IHW4]
-1.02654	3.08749e-18	AT5G48620	Probable disease resistance RPP8-like protein 4 [Source:UniProtKB/Swiss-Prot;Acc:Q9FJK8]
-1.02558	1.75689e-20	AT1G07220	F10K1.7 protein [Source:UniProtKB/TrEMBL;Acc:Q9LML4]
-1.02506	3.98169e-26	AT3G21220	MKK5 [Source:UniProtKB/TrEMBL;Acc:A0A178VIK5]
-1.02501	5.03667e-16	AT3G13050	Organic cation/carnitine transporter 7 [Source:UniProtKB/Swiss-Prot;Acc:Q940M4]
-1.02437	2.0566e-26	AT5G50460	Protein transport protein Sec61 subunit gamma-1 [Source:UniProtKB/Swiss-Prot;Acc:P0DI74]
-1.02423	1.46109e-27	AT2G31060	Elongation factor family protein [Source:UniProtKB/TrEMBL;Acc:F4IPW5]
-1.02419	5.35793e-23	AT4G26910	Dihydrolipoyllysine-residue succinyltransferase component of 2-oxoglutarate dehydrogenase complex 2, mitochondrial [Source:UniProtKB/Swiss-Prot;Acc:Q8H107]
-1.02255	7.00067e-20	AT4G21580	AT4g21580/F18E5_200 [Source:UniProtKB/TrEMBL;Acc:O65423]
-1.02217	1.45616e-13	AT4G03820	Protein of unknown function (DUF3537) [Source:TAIR;Acc:AT4G03820]
-1.02082	7.75692e-11	AT2G02960	RING/FYVE/PHD zinc finger superfamily protein [Source:UniProtKB/TrEMBL;Acc:F4IS71]
-1.02059	3.77305e-06	AT5G64780	Holocarboxylase synthetase [Source:UniProtKB/TrEMBL;Acc:Q9FGF5]
-1.02042	1.46464e-13	AT4G36945	PLC-like phosphodiesterases superfamily protein [Source:UniProtKB/TrEMBL;Acc:F4JQJ7]
-1.02014	2.00107e-23	AT4G17720	Putative RRM-containing protein [Source:UniProtKB/TrEMBL;Acc:Q8LA96]
-1.02008	2.05617e-07	AT1G76590	At1g76590 [Source:UniProtKB/TrEMBL;Acc:Q2HIW3]
-1.01838	0.0480253	AT4G37770	1-aminocyclopropane-1-carboxylate synthase-like protein [Source:UniProtKB/TrEMBL;Acc:Q56Y32]
-1.01834	3.52904e-10	AT4G12120	Protein transport Sec1b [Source:UniProtKB/Swiss-Prot;Acc:Q9SZ77]
-1.01705	2.9388e-24	AT4G23850	Long chain acyl-CoA synthetase 4 [Source:UniProtKB/Swiss-Prot;Acc:Q9T0A0]
-1.01511	0.0422056	AT5G58570	Transmembrane protein [Source:UniProtKB/TrEMBL;Acc:Q94AT2]
-1.01347	7.49445e-11	AT1G17480	At1g17480 [Source:UniProtKB/TrEMBL;Acc:Q2NND9]
-1.0133	4.24571e-21	AT1G42990	bZIP transcription factor 60 [Source:UniProtKB/Swiss-Prot;Acc:Q9C7S0]
-1.01289	8.9813e-08	AT3G47530	Pentatricopeptide repeat-containing protein At3g47530 [Source:UniProtKB/Swiss-Prot;Acc:Q9SN85]
-1.01256	2.93073e-20	AT1G75510	At1g75700 [Source:UniProtKB/TrEMBL;Acc:Q9LQZ4]
-1.01114	2.49686e-09	AT4G37260	MYB73 [Source:UniProtKB/TrEMBL;Acc:A0A178V4E7]
-1.01109	6.4661e-19	AT3G17000	Ubiquitin-conjugating enzyme E2 32 [Source:UniProtKB/Swiss-Prot;Acc:Q9LSP7]
-1.01098	3.06199e-12	AT5G54780	Ypt/Rab-GAP domain of gyp1p superfamily protein [Source:UniProtKB/TrEMBL;Acc:Q0WV47]
-1.01029	8.54497e-23	AT2G07180	Probable serine/threonine-protein kinase PBL17 [Source:UniProtKB/Swiss-Prot;Acc:Q8H1E3]
-1.00994	5.70235e-06	AT5G62865	Uncharacterized protein At5g62860/MQB2_160 [Source:UniProtKB/TrEMBL;Acc:Q9FM08]
-1.0094	2.04567e-10	AT1G63740	Disease resistance protein (TIR-NBS-LRR class) family [Source:UniProtKB/TrEMBL;Acc:Q9CAD9]
-1.00838	4.61627e-19	AT4G29160	Vacuolar protein sorting-associated protein 32 homolog 2 [Source:UniProtKB/Swiss-Prot;Acc:Q9SZE4]
-1.00741	2.89786e-17	AT4G18800	RABA1d [Source:UniProtKB/TrEMBL;Acc:A0A178V3A0]
-1.00738	0.0125126	AT4G28150	Uncharacterized protein At4g28150 [Source:UniProtKB/TrEMBL;Acc:Q8GUN3]
-1.00683	0.00742083	AT1G43800	Stearoyl-[acyl-carrier-protein] 9-desaturase 6, chloroplastic [Source:UniProtKB/Swiss-Prot;Acc:Q84VY3]
-1.00675	1.44117e-07	AT5G41850	Alpha/beta-Hydrolases superfamily protein [Source:UniProtKB/TrEMBL;Acc:Q9FJ29]
-1.00617	2.88131e-08	AT1G22510	E3 ubiquitin-protein ligase RNF170-like protein (DUF 1232) [Source:UniProtKB/TrEMBL;Acc:F4I1E4]
-1.00539	5.10542e-20	AT1G64385	At1g64385 [Source:UniProtKB/TrEMBL;Acc:Q8GUH9]
-1.00531	5.14149e-22	AT1G60490	Phosphatidylinositol 3-kinase VPS34 [Source:UniProtKB/Swiss-Prot;Acc:P42339]
-1.00504	1.74717e-23	AT2G45070	Protein transport protein Sec61 subunit beta [Source:UniProtKB/TrEMBL;Acc:A0A178VTT1]
-1.00504	0.0012588	AT4G30120	Putative inactive cadmium/zinc-transporting ATPase HMA3 [Source:UniProtKB/Swiss-Prot;Acc:P0CW77]
-1.00334	1.15381e-20	AT3G10010	DEMETER-like protein 2 [Source:UniProtKB/Swiss-Prot;Acc:Q9SR66]
-1.00289	1.24225e-16	AT3G07700	Protein kinase superfamily protein [Source:UniProtKB/TrEMBL;Acc:F4JFM1]
-1.00257	3.71663e-28	AT5G04410	NAC domain-containing protein 78 [Source:UniProtKB/Swiss-Prot;Acc:Q84K00]
-1.00225	2.15954e-18	AT3G15810	Protein LURP-one-related 12 [Source:UniProtKB/Swiss-Prot;Acc:Q9LVZ8]
-1.00217	4.79547e-11	AT2G34650	PID [Source:UniProtKB/TrEMBL;Acc:A0A178VTE5]
-1.00202	0.000223924	AT3G12650	AT3g12650/T2E22_103 [Source:UniProtKB/TrEMBL;Acc:Q9LTX0]
-1.00044	8.26612e-17	AT5G66250	Kinectin-like protein [Source:UniProtKB/TrEMBL;Acc:F4JZ59]
-1.00037	1.94788e-27	AT4G35310	CPK5 [Source:UniProtKB/TrEMBL;Acc:A0A178V3J8]
-1	7.30477e-09	AT3G11040	Glycosyl hydrolase family 85 [Source:UniProtKB/TrEMBL;Acc:A0A1I9LSS8]
-0.999236	1.94148e-15	AT3G10985	Senescence associated gene 20 [Source:UniProtKB/Swiss-Prot;Acc:Q94AK6]
-0.998621	6.62039e-19	AT1G71220	UDP-glucose:glycoprotein glucosyltransferases;transferases, transferring hexosyl groups;transferases, transferring glycosyl groups [Source:TAIR;Acc:AT1G71220]
-0.9981	2.41472e-21	AT5G07340	Calreticulin family protein [Source:UniProtKB/TrEMBL;Acc:F4K6M8]
-0.997656	1.04627e-12	AT5G53730	NHL26 [Source:UniProtKB/TrEMBL;Acc:A0A178UFX4]
-0.997585	6.04137e-14	AT4G00290	Mechanosensitive ion channel protein 1, mitochondrial [Source:UniProtKB/Swiss-Prot;Acc:Q8VZL4]
-0.997265	0.00897904	AT2G29460	Glutathione S-transferase U4 [Source:UniProtKB/Swiss-Prot;Acc:Q9ZW27]
-0.997079	9.72576e-19	AT1G09630	Ras-related protein RABA2a [Source:UniProtKB/Swiss-Prot;Acc:O04486]
-0.996849	2.0468e-11	AT1G80290	Nucleotide-diphospho-sugar transferases superfamily protein [Source:TAIR;Acc:AT1G80290]
-0.996158	1.84376e-08	AT1G52550	At1g52550 [Source:UniProtKB/TrEMBL;Acc:Q9SSQ7]
-0.996074	7.68752e-07	AT5G62180	Probable carboxylesterase 120 [Source:UniProtKB/Swiss-Prot;Acc:Q9LVB8]
-0.995604	1.05328e-24	AT3G24180	Non-lysosomal glucosylceramidase [Source:UniProtKB/TrEMBL;Acc:Q8VZ08]
-0.995512	0.0122666	AT1G16130	Wall-associated receptor kinase-like 2 [Source:UniProtKB/Swiss-Prot;Acc:Q7X8C5]
-0.994552	9.30191e-10	AT1G29330	ER lumen protein-retaining receptor A [Source:UniProtKB/Swiss-Prot;Acc:P35402]
-0.993969	1.86037e-24	AT5G08160	AT5g08160 [Source:UniProtKB/TrEMBL;Acc:O04265]
-0.993741	4.85352e-12	AT1G77500	DUF630 family protein, putative (DUF630 and DUF632) [Source:UniProtKB/TrEMBL;Acc:Q9CAQ5]
-0.992968	3.32029e-10	AT1G30420	ABC transporter C family member 11 [Source:UniProtKB/Swiss-Prot;Acc:Q9C8H1]
-0.990533	4.97301e-18	AT3G55850	Protein LONG AFTER FAR-RED 3 [Source:UniProtKB/Swiss-Prot;Acc:A0A1I9LN01]
-0.9904	1.50455e-14	AT1G67360	REF/SRPP-like protein At1g67360 [Source:UniProtKB/Swiss-Prot;Acc:Q9FYF7]
-0.98973	1.03707e-17	AT5G50350	Uncharacterized protein At5g50350 [Source:UniProtKB/TrEMBL;Acc:Q9FK37]
-0.989373	3.88534e-23	AT5G55130	Adenylyltransferase and sulfurtransferase MOCS3 [Source:UniProtKB/Swiss-Prot;Acc:Q9ZNW0]
-0.988617	1.03125e-10	AT5G26770	unknown protein; BEST Arabidopsis thaliana protein match is: unknown protein (TAIR:AT3G05830.1); Has 35333 Blast hits to 34131 proteins in 2444 species: Archae - 798; Bacteria - 22429; Metazoa - 974; Fungi - 991; Plants - 531; Viruses - 0; Other Euk /.../s - 9610 (source: NCBI BLink). [Source:TAIR;Acc:AT5G26770]
-0.988504	5.55536e-11	AT5G40280	Prenyltransferase family protein [Source:TAIR;Acc:AT5G40280]
-0.98822	6.57571e-23	AT4G23650	CPK3 [Source:UniProtKB/TrEMBL;Acc:A0A178V4I3]
-0.987927	0.000333592	AT1G73860	Kinesin-like protein KIN-14P [Source:UniProtKB/Swiss-Prot;Acc:Q0WN69]
-0.987508	0.02536	AT3G26430	GDSL esterase/lipase At3g26430 [Source:UniProtKB/Swiss-Prot;Acc:Q9LIN2]
-0.98657	5.77075e-17	AT3G49350	At3g49350 [Source:UniProtKB/TrEMBL;Acc:Q4V3B4]
-0.985634	5.1688e-17	AT1G49710	FUT12 [Source:UniProtKB/TrEMBL;Acc:A0A178W149]
-0.985516	2.23795e-17	AT4G19990	FAR1-related sequence 1 [Source:UniProtKB/TrEMBL;Acc:F4JU19]
-0.98487	1.76716e-12	AT5G52870	Probable membrane-associated kinase regulator 5 [Source:UniProtKB/Swiss-Prot;Acc:Q9FLX4]
-0.984644	1.01524e-18	AT4G02370	AT4g02370 protein [Source:UniProtKB/TrEMBL;Acc:O81296]
-0.984522	4.02533e-27	AT5G46250	La-related protein 6A [Source:UniProtKB/Swiss-Prot;Acc:Q94A38]
-0.983321	0.000118776	AT2G04170	TRAF-like family protein [Source:UniProtKB/TrEMBL;Acc:Q6RF45]
-0.983224	6.13674e-07	AT4G11530	cysteine-rich RLK (RECEPTOR-like protein kinase) 34 [Source:TAIR;Acc:AT4G11530]
-0.98238	9.46477e-10	AT3G02150	Transcription factor TCP13 [Source:UniProtKB/Swiss-Prot;Acc:Q9S7W5]
-0.981636	1.19773e-13	AT5G45100	BOI-related E3 ubiquitin-protein ligase 1 [Source:UniProtKB/Swiss-Prot;Acc:Q9FHE4]
-0.98135	2.31458e-05	AT3G23200	CASP-like protein 5B3 [Source:UniProtKB/Swiss-Prot;Acc:Q8L7R5]
-0.980994	6.6965e-28	AT3G62290	ADP-ribosylation factor A1E [Source:UniProtKB/TrEMBL;Acc:Q9M1P5]
-0.980795	1.61898e-18	AT1G68100	IAA-alanine resistance protein 1 [Source:UniProtKB/Swiss-Prot;Acc:Q9M647]
-0.980634	0.00622781	AT1G79900	Mitochondrial arginine transporter BAC2 [Source:UniProtKB/Swiss-Prot;Acc:Q9CA93]
-0.980528	2.09526e-20	AT5G40170	Receptor-like protein 54 [Source:UniProtKB/Swiss-Prot;Acc:F4KHA2]
-0.97986	1.53204e-19	AT4G17570	GATA transcription factor 26 [Source:UniProtKB/TrEMBL;Acc:F4JP80]
-0.979241	0.0313703	AT1G06963	-
-0.979196	6.81119e-11	AT1G73130	F3N23.33 protein [Source:UniProtKB/TrEMBL;Acc:Q9S781]
-0.978911	1.01109e-19	AT4G24690	Protein NBR1 homolog [Source:UniProtKB/Swiss-Prot;Acc:Q9SB64]
-0.978626	1.49721e-16	AT4G09750	NAD(P)-binding Rossmann-fold superfamily protein [Source:UniProtKB/TrEMBL;Acc:Q9SZ91]
-0.978289	2.46187e-21	AT2G20570	GBF's pro-rich region-interacting factor 1 [Source:UniProtKB/TrEMBL;Acc:F4IVF9]
-0.978119	2.16542e-19	AT1G27980	Sphingosine-1-phosphate lyase [Source:UniProtKB/Swiss-Prot;Acc:Q9C509]
-0.977983	1.35295e-11	AT4G29190	Zinc finger CCCH domain-containing protein 49 [Source:UniProtKB/Swiss-Prot;Acc:Q9M0G2]
-0.977704	1.27542e-12	AT2G12550	At2g12550 [Source:UniProtKB/TrEMBL;Acc:Q500V3]
-0.977506	7.549e-17	AT5G52820	NLE [Source:UniProtKB/TrEMBL;Acc:A0A178UNZ3]
-0.976349	6.82214e-11	AT1G14010	Transmembrane emp24 domain-containing protein p24delta7 [Source:UniProtKB/Swiss-Prot;Acc:Q8GYG1]
-0.976173	6.04078e-13	AT1G67550	Urease [Source:UniProtKB/Swiss-Prot;Acc:Q9SR52]
-0.975624	7.60779e-10	AT2G22310	UBP4 [Source:UniProtKB/TrEMBL;Acc:A0A178W1M0]
-0.975338	4.52921e-09	AT1G17330	At1g17330 [Source:UniProtKB/TrEMBL;Acc:Q8GUM8]
-0.974832	9.0627e-10	AT4G40042	At4g40042 [Source:UniProtKB/TrEMBL;Acc:Q84MC9]
-0.974277	8.95273e-15	AT4G08500	Mitogen-activated protein kinase kinase kinase 1 [Source:UniProtKB/Swiss-Prot;Acc:Q39008]
-0.973827	1.96282e-10	AT2G36470	DUF868 family protein, putative (DUF868) [Source:UniProtKB/TrEMBL;Acc:Q9SJQ8]
-0.973754	1.60922e-18	AT3G13062	At3g13062 [Source:UniProtKB/TrEMBL;Acc:B9UY99]
-0.97366	7.57059e-17	AT1G75130	CYP721A1 [Source:UniProtKB/TrEMBL;Acc:A0A178WDX2]
-0.973134	1.24937e-17	AT3G52470	Late embryogenesis abundant (LEA) hydroxyproline-rich glycoprotein family [Source:UniProtKB/TrEMBL;Acc:Q9SVC8]
-0.971889	1.58015e-07	AT3G22260	At3g22260 [Source:UniProtKB/TrEMBL;Acc:Q0V869]
-0.971662	1.67192e-13	AT1G73250	GDP-L-fucose synthase 1 [Source:UniProtKB/Swiss-Prot;Acc:O49213]
-0.97135	1.08196e-18	AT4G10970	unknown protein; BEST Arabidopsis thaliana protein match is: unknown protein (TAIR:AT4G23910.2); Has 1807 Blast hits to 1807 proteins in 277 species: Archae - 0; Bacteria - 0; Metazoa - 736; Fungi - 347; Plants - 385; Viruses - 0; Other Eukaryotes - /.../source: NCBI BLink). [Source:TAIR;Acc:AT4G10970]
-0.971113	0.00293705	AT1G20350	Mitochondrial import inner membrane translocase subunit TIM17-1 [Source:UniProtKB/Swiss-Prot;Acc:Q9LN27]
-0.970374	0.0242332	AT5G65609	unknown protein; FUNCTIONS IN: molecular_function unknown; INVOLVED IN: biological_process unknown; LOCATED IN: chloroplast; BEST Arabidopsis thaliana protein match is: unknown protein (TAIR:AT5G67245.1); Has 30201 Blast hits to 17322 proteins in 78 /.../ies: Archae - 12; Bacteria - 1396; Metazoa - 17338; Fungi - 3422; Plants - 5037; Viruses - 0; Other Eukaryotes - 2996 (source: NCBI BLink). [Sou…
-0.970253	4.49221e-12	AT3G07690	6-phosphogluconate dehydrogenase family protein [Source:TAIR;Acc:AT3G07690]
-0.969792	2.34346e-10	AT3G26690	NUDX13 [Source:UniProtKB/TrEMBL;Acc:A0A178VBM7]
-0.969554	4.18351e-30	AT2G34250	AT2G34250 protein [Source:UniProtKB/TrEMBL;Acc:O80774]
-0.969339	0.00337441	AT1G53270	ABCG10 [Source:UniProtKB/TrEMBL;Acc:A0A178WBC4]
-0.968725	5.0349e-18	AT2G01680	Ankyrin repeat-containing protein At2g01680 [Source:UniProtKB/Swiss-Prot;Acc:Q9ZU96]
-0.968341	9.26677e-09	AT1G16500	>F3O9.30 [Source:UniProtKB/TrEMBL;Acc:Q9SA48]
-0.968274	4.91087e-11	AT3G46920	Kinase superfamily with octicosapeptide/Phox/Bem1p domain-containing protein [Source:UniProtKB/TrEMBL;Acc:A0A1I9LN82]
-0.967937	6.31898e-22	AT2G33630	At2g33630/F4P9.40 [Source:UniProtKB/TrEMBL;Acc:O22813]
-0.967823	9.44799e-17	AT2G14740	VSR3 [Source:UniProtKB/TrEMBL;Acc:A0A178VT51]
-0.966662	0.0049262	AT4G16960	Disease resistance protein (TIR-NBS-LRR class) family [Source:TAIR;Acc:AT4G16960]
-0.966613	0.0171316	AT3G18260	Reticulon-like protein B9 [Source:UniProtKB/Swiss-Prot;Acc:Q9LJQ5]
-0.966464	4.28792e-07	AT1G48370	Probable metal-nicotianamine transporter YSL8 [Source:UniProtKB/Swiss-Prot;Acc:Q6R3K4]
-0.96622	2.92776e-20	AT5G67540	Arabinanase/levansucrase/invertase [Source:TAIR;Acc:AT5G67540]
-0.966132	1.84262e-23	AT5G11560	Catalytics [Source:UniProtKB/TrEMBL;Acc:F4JXW9]
-0.965165	1.12018e-16	AT3G01720	Peptidyl serine alpha-galactosyltransferase [Source:UniProtKB/Swiss-Prot;Acc:Q8VYF9]
-0.964722	1.67392e-15	AT2G31350	Hydroxyacylglutathione hydrolase 2, mitochondrial [Source:UniProtKB/Swiss-Prot;Acc:Q9SID3]
-0.964221	3.54295e-14	AT3G60300	RWD domain-containing protein [Source:UniProtKB/TrEMBL;Acc:F4JAP8]
-0.963987	1.18618e-10	AT3G28450	Inactive LRR receptor-like serine/threonine-protein kinase BIR2 [Source:UniProtKB/Swiss-Prot;Acc:Q9LSI9]
-0.963215	5.84942e-13	AT5G23520	Smr (Small MutS Related) domain-containing protein [Source:UniProtKB/TrEMBL;Acc:Q9LT11]
-0.963024	1.14919e-15	AT5G02040	PRA1 family protein A1 [Source:UniProtKB/Swiss-Prot;Acc:Q9LZM7]
-0.962074	9.69781e-14	AT1G50420	Scarecrow-like protein 3 [Source:UniProtKB/Swiss-Prot;Acc:Q9LPR8]
-0.960937	6.2136e-13	AT1G17340	Phosphoinositide phosphatase SAC5 [Source:UniProtKB/Swiss-Prot;Acc:Q8RW97]
-0.960903	3.20541e-15	AT2G42790	Citrate synthase [Source:UniProtKB/TrEMBL;Acc:Q0WUX6]
-0.960834	3.72772e-22	AT1G32230	Poly [ADP-ribose] polymerase [Source:UniProtKB/TrEMBL;Acc:M5BF30]
-0.960766	1.31899e-17	AT1G74100	Sulfotransferase [Source:UniProtKB/TrEMBL;Acc:M1EU36]
-0.959413	1.30007e-14	AT3G05710	Syntaxin-43 [Source:UniProtKB/Swiss-Prot;Acc:Q9SUJ1]
-0.958777	0.0197988	AT3G48020	At3g48020 [Source:UniProtKB/TrEMBL;Acc:Q9SU65]
-0.958459	1.61051e-15	AT1G48430	Dihydroxyacetone kinase [Source:UniProtKB/TrEMBL;Acc:F4HYF4]
-0.958084	1.91186e-09	AT4G07950	DNA-directed RNA polymerase subunit [Source:UniProtKB/TrEMBL;Acc:Q9ZQC0]
-0.957902	9.26571e-22	AT2G36580	Pyruvate kinase [Source:UniProtKB/TrEMBL;Acc:A0A178VX82]
-0.957361	9.93524e-22	AT2G05840	Proteasome subunit alpha type-6-B [Source:UniProtKB/Swiss-Prot;Acc:O81147]
-0.956931	2.84664e-08	AT1G19180	TIFY10A [Source:UniProtKB/TrEMBL;Acc:A0A178W7G1]
-0.956564	1.45811e-11	AT3G63420	Ggamma-subunit 1 [Source:TAIR;Acc:AT3G63420]
-0.955928	3.25715e-15	AT2G02390	glutathione S-transferase zeta 1 [Source:TAIR;Acc:AT2G02390]
-0.954715	2.32998e-20	AT2G31740	S-adenosyl-L-methionine-dependent methyltransferases superfamily protein [Source:UniProtKB/TrEMBL;Acc:Q8VYT6]
-0.95411	1.87322e-13	AT3G06450	HCO3-transporter family [Source:UniProtKB/TrEMBL;Acc:A0A178V9G0]
-0.952188	9.45563e-09	AT1G74410	NEP1-interacting protein-like 2 [Source:UniProtKB/Swiss-Prot;Acc:Q8LBA0]
-0.951156	1.20109e-05	AT4G21720	At4g21720 [Source:UniProtKB/TrEMBL;Acc:Q9SVS5]
-0.950946	4.52935e-08	AT5G18340	U-box domain-containing protein 48 [Source:UniProtKB/Swiss-Prot;Acc:Q3E9F5]
-0.949801	1.77351e-11	AT1G77890	At1g77890 [Source:UniProtKB/TrEMBL;Acc:Q147F2]
-0.94958	3.65076e-14	AT4G17420	Tryptophan RNA-binding attenuator protein-like protein [Source:UniProtKB/TrEMBL;Acc:Q84J77]
-0.949459	2.34218e-20	AT1G56340	Calreticulin-1 [Source:UniProtKB/Swiss-Prot;Acc:O04151]
-0.949308	1.03996e-08	AT2G02370	At2g02370/T16F16.16 [Source:UniProtKB/TrEMBL;Acc:Q9ZVQ5]
-0.948902	1.67209e-06	AT1G63730	Disease resistance protein (TIR-NBS-LRR class) family [Source:UniProtKB/TrEMBL;Acc:Q9CAD8]
-0.948277	8.0598e-25	AT2G03680	Protein SPIRAL1 [Source:UniProtKB/Swiss-Prot;Acc:Q9SJW3]
-0.947796	1.52538e-26	AT4G19670	RBR-type E3 ubiquitin transferase [Source:UniProtKB/TrEMBL;Acc:O81849]
-0.946738	3.23109e-19	AT4G21180	DnaJ protein ERDJ2B [Source:UniProtKB/Swiss-Prot;Acc:F4JIN3]
-0.945414	0.00583532	AT5G44620	Cytochrome P450, family 706, subfamily A, polypeptide 3 [Source:UniProtKB/TrEMBL;Acc:Q9LU04]
-0.944816	1.07695e-19	AT1G05350	Ubiquitin-like modifier-activating enzyme 5 [Source:UniProtKB/Swiss-Prot;Acc:O23034]
-0.944643	9.71261e-19	AT1G22070	At1g22070 [Source:UniProtKB/TrEMBL;Acc:Q147Q9]
-0.942461	8.13242e-13	AT5G60840	Uncharacterized protein At5g60840 [Source:UniProtKB/TrEMBL;Acc:Q8GXK2]
-0.942339	1.29821e-17	AT5G40060	Disease resistance protein (NBS-LRR class) family [Source:UniProtKB/TrEMBL;Acc:F4KFY1]
-0.940739	3.52783e-16	AT1G02170	MCP1b [Source:UniProtKB/TrEMBL;Acc:A0A178W8H4]
-0.940337	2.39681e-19	AT3G07780	Potyvirus VPg interacting protein (DUF1423) [Source:UniProtKB/TrEMBL;Acc:A0A1I9LQN5]
-0.940301	3.49441e-18	AT5G64400	CONTAINS InterPro DOMAIN/s: CHCH (InterPro:IPR010625); BEST Arabidopsis thaliana protein match is: Cox19-like CHCH family protein (TAIR:AT5G09570.1); Has 1807 Blast hits to 1807 proteins in 277 species: Archae - 0; Bacteria - 0; Metazoa - 736; Fungi /.../; Plants - 385; Viruses - 0; Other Eukaryotes - 339 (source: NCBI BLink). [Source:TAIR;Acc:AT5G64400]
-0.940279	1.62015e-15	AT1G29040	50S ribosomal protein L34 [Source:UniProtKB/TrEMBL;Acc:Q8LDL9]
-0.939941	9.98006e-22	AT1G09430	ATP-citrate synthase alpha chain protein 3 [Source:UniProtKB/Swiss-Prot;Acc:O80526]
-0.939652	1.25549e-11	AT5G63190	MA3 domain-containing protein [Source:UniProtKB/TrEMBL;Acc:Q94BR1]
-0.938681	5.55621e-16	AT5G07910	Leucine-rich repeat (LRR) family protein [Source:UniProtKB/TrEMBL;Acc:Q8RWI2]
-0.937478	0.010825	AT5G64910	unknown protein; BEST Arabidopsis thaliana protein match is: unknown protein (TAIR:AT5G10010.1); Has 1807 Blast hits to 1807 proteins in 277 species: Archae - 0; Bacteria - 0; Metazoa - 736; Fungi - 347; Plants - 385; Viruses - 0; Other Eukaryotes - /.../source: NCBI BLink). [Source:TAIR;Acc:AT5G64910]
-0.937227	3.37704e-10	AT3G07870	F-box protein At3g07870 [Source:UniProtKB/Swiss-Prot;Acc:Q9SFC7]
-0.936434	0.0363222	AT3G06890	At3g06890 [Source:UniProtKB/TrEMBL;Acc:Q9M910]
-0.936351	1.95777e-09	AT2G01860	Pentatricopeptide repeat-containing protein At2g01860 [Source:UniProtKB/Swiss-Prot;Acc:Q5XET4]
-0.93582	5.99454e-15	AT3G12100	Uncharacterized protein At3g12100 [Source:UniProtKB/TrEMBL;Acc:Q0WSX7]
-0.935585	2.37951e-12	AT2G24390	AIG2-like protein D [Source:UniProtKB/Swiss-Prot;Acc:A8MRP2]
-0.935425	1.05635e-12	AT5G01950	Leucine-rich repeat protein kinase family protein [Source:TAIR;Acc:AT5G01950]
-0.935391	0.00266957	AT4G34580	SRH1 [Source:UniProtKB/TrEMBL;Acc:A0A178V672]
-0.93445	9.34557e-15	AT2G43940	HOL3 [Source:UniProtKB/TrEMBL;Acc:A0A178VV10]
-0.934285	7.63389e-15	AT1G07630	PLL5 [Source:UniProtKB/TrEMBL;Acc:A0A178WGF5]
-0.934145	1.69734e-07	AT5G07070	Non-specific serine/threonine protein kinase [Source:UniProtKB/TrEMBL;Acc:A0A178URC7]
-0.933769	2.06966e-19	AT4G39820	Tetratricopeptide repeat (TPR)-like superfamily protein [Source:UniProtKB/TrEMBL;Acc:O65669]
-0.933333	1.50112e-10	AT3G26090	Regulator of G-protein signaling 1 [Source:UniProtKB/Swiss-Prot;Acc:Q8H1F2]
-0.932778	2.75331e-11	AT1G01650	Signal peptide peptidase-like 4 [Source:UniProtKB/Swiss-Prot;Acc:Q0WMJ8]
-0.932264	1.02855e-10	AT5G13200	GEM-like protein 5 [Source:UniProtKB/Swiss-Prot;Acc:Q9LYV6]
-0.932202	4.5847e-23	AT1G17440	Transcription initiation factor TFIID subunit 12b [Source:UniProtKB/Swiss-Prot;Acc:Q940A7]
-0.931703	3.43164e-20	AT4G17270	Putative MO25-like protein At4g17270 [Source:UniProtKB/Swiss-Prot;Acc:Q9M0M4]
-0.930178	9.77198e-09	AT2G40080	Protein EARLY FLOWERING 4 [Source:UniProtKB/Swiss-Prot;Acc:O04211]
-0.929841	4.67017e-11	AT3G05230	Signal peptidase complex subunit 3 [Source:UniProtKB/TrEMBL;Acc:A0A178V7D8]
-0.929661	3.9464e-14	AT5G07830	Heparanase-like protein 1 [Source:UniProtKB/Swiss-Prot;Acc:Q9FF10]
-0.929603	2.43927e-13	AT2G40410	Staphylococcal-like nuclease CAN2 [Source:UniProtKB/Swiss-Prot;Acc:F4IH31]
-0.929551	8.25329e-21	AT1G12360	SNARE-interacting protein KEULE [Source:UniProtKB/Swiss-Prot;Acc:Q9C5X3]
-0.929326	6.78168e-14	AT5G62070	AT5g62070/mtg10_90 [Source:UniProtKB/TrEMBL;Acc:Q9FIT1]
-0.929061	2.75256e-10	AT5G45370	WAT1-related protein At5g45370 [Source:UniProtKB/Swiss-Prot;Acc:F4KD68]
-0.92898	0.00762059	AT2G35736	Uncharacterized protein At2g35736 [Source:UniProtKB/TrEMBL;Acc:Q8S8K5]
-0.92852	2.86806e-05	AT1G34760	general regulatory factor 11 [Source:TAIR;Acc:AT1G34760]
-0.927999	9.91558e-13	AT1G34380	5'-3' exonuclease family protein [Source:UniProtKB/TrEMBL;Acc:Q66GR7]
-0.926626	0.0426886	AT1G61130	Serine carboxypeptidase-like 32 [Source:UniProtKB/Swiss-Prot;Acc:Q4PSY2]
-0.926171	1.63502e-05	AT1G52565	At1g52565 [Source:UniProtKB/TrEMBL;Acc:A0JPU2]
-0.925518	1.93733e-16	AT4G21540	SPHK1 [Source:UniProtKB/TrEMBL;Acc:A0A178V174]
-0.925183	1.06513e-17	AT2G22300	Calmodulin-binding transcription activator 3 [Source:UniProtKB/Swiss-Prot;Acc:Q8GSA7]
-0.924655	1.28644e-07	AT2G41190	Amino acid transporter AVT1A [Source:UniProtKB/Swiss-Prot;Acc:O80668]
-0.924365	0.0168286	AT2G20770	LanC-like protein GCL2 [Source:UniProtKB/Swiss-Prot;Acc:Q8VZQ6]
-0.924299	1.78827e-16	AT5G51290	Ceramide kinase [Source:UniProtKB/Swiss-Prot;Acc:Q6USK2]
-0.923936	1.05442e-17	AT3G08760	AT3G08760 protein [Source:UniProtKB/TrEMBL;Acc:Q9C9Y3]
-0.923533	2.0573e-14	AT5G10190	Major facilitator superfamily protein [Source:UniProtKB/TrEMBL;Acc:Q9C5L6]
-0.923453	9.13877e-18	AT3G49060	U-box domain-containing protein 32 [Source:UniProtKB/Swiss-Prot;Acc:Q94A51]
-0.923425	1.62237e-17	AT2G47640	Putative small nuclear ribonucleoprotein D2 [Source:UniProtKB/TrEMBL;Acc:Q8RUH0]
-0.922918	1.93937e-14	AT1G54150	E3 ubiquitin-protein ligase SPL2 [Source:UniProtKB/Swiss-Prot;Acc:Q9SYH3]
-0.922214	7.8423e-23	AT2G21520	Sec14p-like phosphatidylinositol transfer family protein [Source:UniProtKB/TrEMBL;Acc:B3H588]
-0.921337	2.62703e-15	AT5G40670	Cystinosin homolog [Source:UniProtKB/Swiss-Prot;Acc:P57758]
-0.921045	9.44782e-09	AT5G19950	AT5G19950 protein [Source:UniProtKB/TrEMBL;Acc:Q8L502]
-0.920257	1.03331e-13	AT5G51770	Protein kinase superfamily protein [Source:UniProtKB/TrEMBL;Acc:Q9FLI2]
-0.919939	1.2993e-15	AT5G01960	RING/U-box superfamily protein [Source:UniProtKB/TrEMBL;Acc:Q8L610]
-0.91951	0.000212416	AT2G39230	Pentatricopeptide repeat-containing protein At2g39230, mitochondrial [Source:UniProtKB/Swiss-Prot;Acc:O80958]
-0.919198	9.40014e-20	AT1G16560	AT1G16560 protein [Source:UniProtKB/TrEMBL;Acc:Q9FX73]
-0.917716	5.66243e-09	AT1G67190	F-box/LRR-repeat protein At1g67190 [Source:UniProtKB/Swiss-Prot;Acc:Q9ZW88]
-0.917538	1.72215e-12	AT2G35820	ureidoglycolate hydrolases [Source:TAIR;Acc:AT2G35820]
-0.917297	3.57199e-13	AT3G14050	Probable GTP diphosphokinase RSH2, chloroplastic [Source:UniProtKB/Swiss-Prot;Acc:Q9LVJ3]
-0.917179	1.65067e-17	AT3G59660	BAG-associated GRAM protein 1 [Source:UniProtKB/Swiss-Prot;Acc:Q8W4D4]
-0.916875	6.24957e-09	AT1G11260	STP1 [Source:UniProtKB/TrEMBL;Acc:A0A178WJ63]
-0.916437	1.00964e-15	XLOC_018236	-
-0.916435	3.21617e-16	AT1G78620	Uncharacterized transmembrane protein [Source:UniProtKB/TrEMBL;Acc:F4IBS8]
-0.916373	3.64591e-12	AT5G42140	Regulator of chromosome condensation (RCC1) family with FYVE zinc finger domain [Source:TAIR;Acc:AT5G42140]
-0.916156	1.12009e-25	AT4G04210	PUX4 [Source:UniProtKB/TrEMBL;Acc:A0A178V2K4]
-0.915877	1.85343e-13	AT5G24430	CDPK-related kinase 4 [Source:UniProtKB/Swiss-Prot;Acc:Q9FIM9]
-0.915868	1.21701e-09	AT4G20830	Berberine bridge enzyme-like 19 [Source:UniProtKB/Swiss-Prot;Acc:Q9SVG4]
-0.91525	1.60746e-17	AT2G37540	NAD(P)-binding Rossmann-fold superfamily protein [Source:UniProtKB/TrEMBL;Acc:O80924]
-0.913303	1.72047e-18	AT1G49750	AT1G49750 protein [Source:UniProtKB/TrEMBL;Acc:Q9FXA1]
-0.912878	3.45704e-13	AT3G06050	PRXIIF [Source:UniProtKB/TrEMBL;Acc:A0A178VBA5]
-0.911264	1.9806e-13	AT5G04260	Thioredoxin-like 3-2, chloroplastic [Source:UniProtKB/Swiss-Prot;Acc:Q8VZT6]
-0.910976	0.024101	AT4G05070	AT4g05070 protein [Source:UniProtKB/TrEMBL;Acc:Q9S9T1]
-0.910961	4.49545e-25	AT1G65980	Peroxiredoxin-2B [Source:UniProtKB/Swiss-Prot;Acc:Q9XEX2]
-0.910859	1.85139e-11	AT4G18950	AT4g18950/F13C5_120 [Source:UniProtKB/TrEMBL;Acc:Q93Z30]
-0.90996	4.66394e-11	AT2G37100	Protamine P1 family protein [Source:UniProtKB/TrEMBL;Acc:Q9ZQC7]
-0.909866	6.82458e-09	AT1G21400	Thiamin diphosphate-binding fold (THDP-binding) superfamily protein [Source:TAIR;Acc:AT1G21400]
-0.909041	2.57232e-16	AT3G23400	Plastid-lipid-associated protein 6, chloroplastic [Source:UniProtKB/Swiss-Prot;Acc:Q9LW57]
-0.908842	7.3937e-16	AT1G78920	Pyrophosphate-energized membrane proton pump 2 [Source:UniProtKB/Swiss-Prot;Acc:Q56ZN6]
-0.907977	6.76033e-06	AT5G38940	RmlC-like cupins superfamily protein [Source:TAIR;Acc:AT5G38940]
-0.907805	1.905e-15	AT5G64550	Emb [Source:UniProtKB/TrEMBL;Acc:Q9FLG3]
-0.907787	9.43604e-08	AT5G55930	Oligopeptide transporter 1 [Source:UniProtKB/Swiss-Prot;Acc:Q9FG72]
-0.907542	7.79148e-05	AT3G11440	Transcription factor [Source:UniProtKB/TrEMBL;Acc:A0A178VKX5]
-0.90689	0.00888427	AT1G63530	BEST Arabidopsis thaliana protein match is: hydroxyproline-rich glycoprotein family protein (TAIR:AT1G63540.1); Has 10212 Blast hits to 4024 proteins in 434 species: Archae - 1; Bacteria - 1259; Metazoa - 3608; Fungi - 2247; Plants - 291; Viruses - /.../her Eukaryotes - 2716 (source: NCBI BLink). [Source:TAIR;Acc:AT1G63530]
-0.906471	0.000163353	AT3G15630	AT3g15630/MSJ11_3 [Source:UniProtKB/TrEMBL;Acc:Q9LW16]
-0.906212	2.6395e-11	AT3G44450	Protein BIC2 [Source:UniProtKB/Swiss-Prot;Acc:Q9M280]
-0.905454	0.0435328	AT1G74150	Galactose oxidase/kelch repeat superfamily protein [Source:UniProtKB/TrEMBL;Acc:F4HTV1]
-0.904694	3.33293e-22	AT2G26300	Guanine nucleotide-binding protein alpha-1 subunit [Source:UniProtKB/Swiss-Prot;Acc:P18064]
-0.904624	4.46139e-09	AT2G22570	NIC1 [Source:UniProtKB/TrEMBL;Acc:A0A178VQ19]
-0.904583	4.9961e-10	AT2G47380	Probable cytochrome c oxidase subunit 5C-1 [Source:UniProtKB/Swiss-Prot;Acc:O22912]
-0.904425	3.57956e-14	AT4G05050	Polyubiquitin [Source:UniProtKB/TrEMBL;Acc:Q8H0Y0]
-0.904062	2.09523e-07	AT4G25300	2-oxoglutarate (2OG) and Fe(II)-dependent oxygenase superfamily protein [Source:UniProtKB/TrEMBL;Acc:Q9SB33]
-0.904011	6.72801e-06	AT1G10040	Alpha/beta-Hydrolases superfamily protein [Source:UniProtKB/TrEMBL;Acc:Q08A69]
-0.903871	0.00163961	AT4G16670	At4g16670 [Source:UniProtKB/TrEMBL;Acc:Q5HZ31]
-0.903728	4.5149e-11	AT3G54810	GATA transcription factor [Source:UniProtKB/TrEMBL;Acc:B9DHF1]
-0.902879	2.92662e-14	AT2G15320	Leucine-rich repeat (LRR) family protein [Source:UniProtKB/TrEMBL;Acc:Q9SHU4]
-0.90208	8.71724e-11	AT1G54210	Ubiquitin-like protein ATG12 [Source:UniProtKB/TrEMBL;Acc:A0A178VZU7]
-0.900869	1.56603e-13	AT3G21640	Peptidylprolyl isomerase [Source:UniProtKB/TrEMBL;Acc:A0A178V6X3]
-0.900464	9.87963e-11	AT5G18490	At5g18490 [Source:UniProtKB/TrEMBL;Acc:Q940K1]
-0.899071	0.00659106	AT4G37095	unknown protein; Has 0 Blast hits to 0 proteins in 0 species (source: NCBI BLink). [Source:TAIR;Acc:AT4G37095]
-0.898831	4.70627e-16	AT3G10640	Vacuolar protein sorting-associated protein 60.1 [Source:UniProtKB/Swiss-Prot;Acc:Q9LPN5]
-0.89741	6.04216e-10	AT2G21500	At2g21560 [Source:UniProtKB/TrEMBL;Acc:Q8RWF9]
-0.897063	3.74933e-10	AT5G20910	E3 ubiquitin-protein ligase AIP2 [Source:UniProtKB/Swiss-Prot;Acc:Q8RXD3]
-0.896488	6.86501e-20	AT5G54310	Probable ADP-ribosylation factor GTPase-activating protein AGD5 [Source:UniProtKB/Swiss-Prot;Acc:Q9FL69]
-0.896346	2.83828e-10	AT5G03080	LPPgamma [Source:UniProtKB/TrEMBL;Acc:A0A178URC2]
-0.895914	3.34589e-11	AT1G34300	G-type lectin S-receptor-like serine/threonine-protein kinase At1g34300 [Source:UniProtKB/Swiss-Prot;Acc:Q9XID3]
-0.894149	5.80397e-12	AT2G27580	Zinc finger A20 and AN1 domain-containing stress-associated protein 3 [Source:UniProtKB/Swiss-Prot;Acc:Q9ZNU9]
-0.894069	1.16362e-16	AT2G46080	BPS2 [Source:UniProtKB/TrEMBL;Acc:A0A178VNI3]
-0.893952	1.75964e-12	AT4G19185	WAT1-related protein [Source:UniProtKB/TrEMBL;Acc:A0A178UVH6]
-0.893866	1.94297e-15	AT3G08690	Ubiquitin-conjugating enzyme E2 11 [Source:UniProtKB/Swiss-Prot;Acc:P35134]
-0.89385	2.10384e-09	AT1G09645	At1g09645 [Source:UniProtKB/TrEMBL;Acc:Q6GKX8]
-0.893486	2.09894e-12	AT5G40300	CASP-like protein 4A1 [Source:UniProtKB/Swiss-Prot;Acc:Q9FNE8]
-0.893147	3.81888e-05	AT1G32940	Subtilisin-like protease SBT3.5 [Source:UniProtKB/Swiss-Prot;Acc:Q9MAP7]
-0.893085	9.0018e-06	AT4G18210	Probable purine permease 10 [Source:UniProtKB/Swiss-Prot;Acc:O49725]
-0.891127	2.72976e-14	AT5G64430	At5g64430 [Source:UniProtKB/TrEMBL;Acc:Q9FGF3]
-0.890802	2.53646e-05	AT2G46390	Succinate dehydrogenase subunit 8, mitochondrial [Source:UniProtKB/Swiss-Prot;Acc:Q9SKE0]
-0.890027	0.000130616	XLOC_018266	-
-0.889909	4.60757e-16	AT3G55260	Beta-hexosaminidase [Source:UniProtKB/TrEMBL;Acc:A0A178VFV1]
-0.889764	2.73372e-06	AT5G66070	RING/U-box superfamily protein [Source:UniProtKB/TrEMBL;Acc:F4JZ26]
-0.889244	7.04997e-05	AT1G69890	Actin cross-linking protein (DUF569) [Source:UniProtKB/TrEMBL;Acc:Q9CAS2]
-0.889128	1.31607e-15	AT5G35200	Putative clathrin assembly protein At5g35200 [Source:UniProtKB/Swiss-Prot;Acc:Q9LHS0]
-0.888834	1.22605e-11	AT3G51920	Calmodulin-like protein 9 [Source:UniProtKB/Swiss-Prot;Acc:Q9S744]
-0.888063	2.18457e-08	AT3G52800	A20/AN1-like zinc finger family protein [Source:UniProtKB/TrEMBL;Acc:A0A178VIF4]
-0.887991	1.08565e-10	AT4G14270	Polyadenylate-binding protein-interacting protein 2 [Source:UniProtKB/Swiss-Prot;Acc:Q94AR4]
-0.887041	3.81809e-18	AT2G26740	ATsEH [Source:UniProtKB/TrEMBL;Acc:Q42566]
-0.886629	6.15767e-09	AT5G11650	Alpha/beta-Hydrolases superfamily protein [Source:UniProtKB/TrEMBL;Acc:Q9LYG5]
-0.886231	0.0118258	XLOC_004208	-
-0.884965	3.67985e-10	AT1G27100	Actin cross-linking protein [Source:UniProtKB/TrEMBL;Acc:Q0WQH3]
-0.884612	2.49476e-16	AT5G48810	Cytochrome B5 isoform D [Source:UniProtKB/Swiss-Prot;Acc:Q9ZWT2]
-0.884124	6.75293e-20	AT1G34190	NAC017 [Source:UniProtKB/TrEMBL;Acc:A0A178WNW4]
-0.882838	0.000265907	AT5G66400	RAB18 [Source:UniProtKB/TrEMBL;Acc:A0A178UN24]
-0.882822	1.77945e-14	AT5G10840	Transmembrane 9 superfamily member 8 [Source:UniProtKB/Swiss-Prot;Acc:F4KIB2]
-0.882506	0.000297845	AT2G25625	Expressed protein [Source:UniProtKB/TrEMBL;Acc:Q8S8K8]
-0.882023	8.35678e-20	AT2G33120	AT2G33120 protein [Source:UniProtKB/TrEMBL;Acc:B9DH97]
-0.881746	6.32874e-15	AT1G60890	Phosphatidylinositol 4-phosphate 5-kinase [Source:UniProtKB/TrEMBL;Acc:F4HRM3]
-0.881645	5.16362e-15	AT4G29330	Derlin-1 [Source:UniProtKB/Swiss-Prot;Acc:Q8VZU9]
-0.880611	0.00969724	AT1G58190	-
-0.880442	8.98716e-12	AT3G46440	UDP-glucuronic acid decarboxylase 5 [Source:UniProtKB/Swiss-Prot;Acc:Q9SN95]
-0.879867	0.0152883	AT1G75590	SAUR-like auxin-responsive protein family [Source:UniProtKB/TrEMBL;Acc:F4HZ54]
-0.879849	0.00882477	AT1G23390	F-box/Kelch repeat-containing F-box family protein [Source:UniProtKB/TrEMBL;Acc:C4PVQ8]
-0.879544	1.65887e-11	AT1G69550	Disease resistance protein (TIR-NBS-LRR class) [Source:UniProtKB/TrEMBL;Acc:F4I270]
-0.87949	8.60163e-18	AT4G00300	Receptor-like kinase [Source:UniProtKB/TrEMBL;Acc:Q0WQL0]
-0.879459	2.92113e-21	AT4G25880	pumilio 6 [Source:TAIR;Acc:AT4G25880]
-0.87933	0.0077226	AT3G56240	Copper transport protein CCH [Source:UniProtKB/Swiss-Prot;Acc:O82089]
-0.879267	9.67016e-10	AT2G32380	At2g32380 [Source:UniProtKB/TrEMBL;Acc:Q9ZV66]
-0.87875	3.76925e-13	AT2G04690	Pyridoxamine 5'-phosphate oxidase family protein [Source:TAIR;Acc:AT2G04690]
-0.878602	2.94126e-09	AT2G33830	DRM2 [Source:UniProtKB/TrEMBL;Acc:A0A178VR62]
-0.878404	2.35386e-05	AT4G10960	UDP-glucose 4-epimerase 5 [Source:UniProtKB/Swiss-Prot;Acc:Q9SN58]
-0.878094	3.12413e-14	AT1G32790	CTC-interacting domain 11 [Source:UniProtKB/TrEMBL;Acc:F4IEC7]
-0.877891	5.61071e-10	AT1G30540	Actin-like ATPase superfamily protein [Source:UniProtKB/TrEMBL;Acc:Q8LGE0]
-0.877751	2.23872e-10	AT4G05020	NAD(P)H dehydrogenase B2 [Source:UniProtKB/TrEMBL;Acc:F4JGL5]
-0.877381	2.38915e-09	AT3G53120	Vacuolar protein-sorting-associated protein 37 homolog 1 [Source:UniProtKB/Swiss-Prot;Acc:Q9SCP9]
-0.877341	3.85326e-09	AT2G01180	phosphatidic acid phosphatase 1 [Source:TAIR;Acc:AT2G01180]
-0.877276	6.18062e-08	AT5G25770	Alpha/beta-Hydrolases superfamily protein [Source:UniProtKB/TrEMBL;Acc:A8MQE3]
[truncated: 3,356 more rows]

## Sheet: Supplemental Data Set 3B
Supplemental Data Set 3. Genes deregulated in an RNA-seq analysis of api7-1 plants and gene ontology term enrichment analysis
Supplemental Data Set 3B. Gene ontology term enrichment analysis of genes upregulated in api7-1 plants
Term	Description	Count	%	p-value	Genes	List Total	Pop Hits	Pop Total	Fold Enrichment	Bonferroni	Benjamini	FDR
GO:0000272	polysaccharide catabolic process	5	0.25974	0.0575482	AT2G43590, AT1G09340, AT2G43610, AT2G43620, AT5G24090	1384	20	18499	3.34158	1	0.817034	0.798103
GO:0005975	carbohydrate metabolic process	50	2.5974	0.000239945	AT1G80160, AT1G60590, AT1G60270, AT5G24420, AT3G06770, AT3G21370, AT4G19810, AT3G62750, AT1G51470, AT1G48100, AT2G43620, AT4G31140, AT3G15720, AT1G03310, AT1G55370, AT5G25980, AT1G64760, AT5G17520, AT5G14650, AT1G45191, AT5G24090, AT3G60140, AT1G47600, AT3G13750, AT3G52840, AT3G09260, AT3G12700, AT2G05790, AT4G24430, AT5G51820, AT1G32860, AT4G23500, AT1G55740, AT4G21760, AT1G56710, AT2G36870, AT5…	1384	390	18499	1.71363	0.228309	0.0136263	0.0133106
GO:0006040	amino sugar metabolic process	4	0.207792	0.0966007	AT2G43590, AT2G43610, AT2G43620, AT3G04720	1384	15	18499	3.56435	1	1	0.977737
GO:0006351	transcription, DNA-templated	167	8.67532	0.0138898	AT5G06839, AT4G06746, AT3G54730, AT2G06200, AT3G03260, AT3G50890, AT5G65410, AT1G67220, AT4G22950, AT5G46690, AT3G20840, AT1G46480, AT3G45610, AT5G60120, AT2G39250, AT1G27045, AT5G06710, AT2G47260, AT5G03720, AT1G62975, AT5G18270, AT5G52170, AT4G00870, AT1G21910, AT2G36307, AT5G42780, AT2G33710, AT4G04030, AT5G65640, AT3G61950, AT3G18090, AT5G56780, AT2G42380, AT4G17460, AT5G39860, AT3G51910, AT3…	1384	1886	18499	1.18355	1	0.356837	0.348569
GO:0006353	DNA-templated transcription, termination	4	0.207792	0.0816398	AT5G55580, AT2G21710, AT4G18740, AT2G41550	1384	14	18499	3.81895	1	0.947197	0.925251
GO:0006355	regulation of transcription, DNA-templated	184	9.55844	0.0187006	AT5G06839, AT4G06746, AT3G54730, AT2G06200, AT3G03260, AT3G50890, AT5G65410, AT1G67220, AT4G22950, AT5G46690, AT3G20840, AT1G46480, AT3G45610, AT5G60120, AT2G39250, AT2G21710, AT1G27045, AT5G06710, AT2G47260, AT5G03720, AT5G18270, AT5G52170, AT4G00870, AT1G21910, AT2G36307, AT5G42780, AT2G33710, AT4G04030, AT5G65640, AT3G61950, AT5G49330, AT3G18090, AT1G10585, AT5G56780, AT4G30180, AT4G17460, AT5…	1384	2119	18499	1.16064	1	0.429317	0.41937
GO:0006357	regulation of transcription from RNA polymerase II promoter	24	1.24675	0.047971	AT3G56980, AT1G56650, AT3G56970, AT5G16770, AT1G66230, AT5G49330, AT3G62610, AT5G65790, AT5G16600, AT1G10585, AT1G18710, AT5G04150, AT5G07690, AT3G47600, AT3G48920, AT3G61250, AT5G60890, AT5G56840, AT5G61420, AT5G10280, AT5G07700, AT2G47460, AT1G62975, AT2G41240	1384	213	18499	1.50607	1	0.742022	0.72483
GO:0006508	proteolysis	50	2.5974	0.0313584	AT5G59090, AT4G30610, AT5G23210, AT1G62290, AT3G02410, AT2G38870, AT2G22920, AT2G34080, AT1G79320, AT3G45010, AT5G05740, AT4G16540, AT2G23010, AT5G45650, AT5G19740, AT2G35770, AT4G08430, AT4G36880, AT1G29110, AT2G23000, AT3G48350, AT3G12700, AT2G03130, AT5G59130, AT4G30020, AT5G22860, AT2G04160, AT3G02110, AT4G20070, AT5G44530, AT1G73325, AT3G19390, AT3G16150, AT2G48130, AT5G03620, AT2G03020, AT1…	1384	500	18499	1.33663	1	0.60421	0.59021
GO:0006631	fatty acid metabolic process	10	0.519481	0.0301917	AT1G49430, AT2G11810, AT5G05270, AT3G55120, AT3G23790, AT5G20410, AT2G22890, AT2G17650, AT4G32770, AT3G63170	1384	59	18499	2.26548	1	0.592306	0.578582
GO:0006633	fatty acid biosynthetic process	17	0.883117	0.0292577	AT3G05020, AT4G25700, AT5G42650, AT5G57800, AT5G48880, AT3G01420, AT1G49430, AT5G05580, AT2G46720, AT1G36180, AT5G10160, AT1G76690, AT1G76680, AT5G38020, AT4G34510, AT5G04530, AT3G25180	1384	128	18499	1.77522	1	0.584612	0.571067
GO:0006749	glutathione metabolic process	10	0.519481	0.040001	AT1G10370, AT2G29490, AT1G17190, AT1G17180, AT1G17170, AT5G17220, AT1G49860, AT1G75270, AT1G78340, AT2G29440	1384	62	18499	2.15586	1	0.700308	0.684083
GO:0006810	transport	45	2.33766	0.000449368	AT2G36830, AT5G44110, AT5G21430, AT3G53420, AT1G14150, AT3G59340, AT3G26520, AT3G24300, AT3G01440, AT1G18730, AT4G25220, AT2G25810, AT5G64700, AT2G37170, AT3G16250, AT5G60660, AT5G04770, AT5G40210, AT1G43650, AT4G15230, AT3G06100, AT3G28130, AT4G01440, AT4G19030, AT5G43750, AT1G64780, AT2G37450, AT4G28040, AT2G36380, AT3G59330, AT5G47450, AT5G13930, AT2G21540, AT1G74880, AT2G46840, AT1G72140, AT1…	1384	349	18499	1.72345	0.384565	0.023089	0.022554
GO:0006817	phosphate ion transport	11	0.571429	1.3685e-05	AT1G26730, AT3G26570, AT5G43370, AT5G43340, AT2G38940, AT5G43350, AT1G68740, AT3G23430, AT1G20860, AT3G01970, AT1G69480	1384	27	18499	5.44554	0.0146712	0.00164068	0.00160267
GO:0006826	iron ion transport	6	0.311688	0.00117611	AT3G56090, AT4G19690, AT3G11050, AT5G03570, AT1G60960, AT4G19680	1384	12	18499	6.68316	0.719433	0.0528758	0.0516507
GO:0006829	zinc II ion transport	5	0.25974	0.0217959	AT5G59520, AT4G19690, AT1G60960, AT2G32270, AT4G19680	1384	15	18499	4.45544	1	0.470356	0.459458
GO:0006833	water transport	4	0.207792	0.0436972	AT2G36830, AT2G37170, AT3G53420, AT3G16240	1384	11	18499	4.86048	1	0.725373	0.708567
GO:0006855	drug transmembrane transport	17	0.883117	4.54679e-05	AT2G04050, AT1G11670, AT5G19700, AT3G23550, AT1G73700, AT3G53480, AT5G44050, AT1G12950, AT5G17700, AT3G03620, AT1G71870, AT2G37280, AT4G21910, AT3G08040, AT1G15180, AT2G04040, AT4G15230	1384	70	18499	3.24611	0.0479203	0.00377384	0.0036864
GO:0006857	oligopeptide transport	16	0.831169	0.000100374	AT1G12110, AT1G65730, AT1G32450, AT1G59740, AT3G21670, AT3G54140, AT4G21680, AT1G72130, AT1G22570, AT5G13400, AT5G01180, AT1G72140, AT5G62730, AT2G02020, AT1G52190, AT2G26690	1384	67	18499	3.19196	0.102739	0.00722021	0.00705292
GO:0006865	amino acid transport	8	0.415584	0.070513	AT4G25760, AT3G54830, AT5G15240, AT3G56200, AT1G77690, AT2G36590, AT1G44800, AT2G21050	1384	49	18499	2.18226	1	0.864585	0.844553
GO:0006979	response to oxidative stress	43	2.23377	2.98122e-05	AT5G40150, AT5G16980, AT3G28200, AT3G49960, AT2G28190, AT3G57520, AT5G64100, AT5G64120, AT4G08780, AT3G53260, AT2G18980, AT4G26010, AT3G01420, AT1G73120, AT1G49570, AT2G24800, AT2G38380, AT2G04795, AT5G58390, AT4G33420, AT4G11290, AT4G32770, AT1G75280, AT4G04830, AT5G66390, AT5G22410, AT3G49110, AT5G17000, AT5G43750, AT2G34060, AT5G67400, AT1G30870, AT5G44380, AT4G08770, AT5G42180, AT5G13930, AT2…	1384	291	18499	1.97509	0.0316848	0.00268061	0.0026185
GO:0007275	multicellular organism development	50	2.5974	0.000167305	AT5G18020, AT1G66650, AT1G68795, AT5G66300, AT3G01600, AT5G46690, AT1G29500, AT4G12980, AT2G45400, AT5G60120, AT2G39250, AT5G35750, AT2G46690, AT5G18270, AT5G15380, AT1G68800, AT2G40400, AT4G40090, AT5G17520, AT5G65640, AT2G45210, AT3G58070, AT1G29510, AT2G18060, AT1G76420, AT1G70440, AT5G51330, AT3G13672, AT3G25290, AT3G29035, AT5G64060, AT1G18835, AT3G54990, AT2G45190, AT5G17430, AT1G29450, AT5…	1384	384	18499	1.74041	0.165318	0.010029	0.00979666
GO:0008152	metabolic process	46	2.38961	7.45593e-06	AT2G30150, AT2G04160, AT4G29700, AT5G23530, AT5G59090, AT5G27410, AT3G23790, AT4G14090, AT5G44530, AT1G65060, AT2G36750, AT3G02410, AT3G46700, AT1G49430, AT3G48700, AT5G37950, AT3G48420, AT2G29730, AT4G34138, AT5G05860, AT2G29710, AT5G38120, AT1G77060, AT5G03620, AT2G31790, AT5G45650, AT4G29710, AT4G09500, AT5G48880, AT2G16890, AT5G66690, AT3G62040, AT1G22360, AT1G49660, AT2G15490, AT2G22930, AT2…	1384	303	18499	2.02921	0.00802011	0.00153975	0.00150407
GO:0009056	catabolic process	5	0.25974	0.0882788	AT1G49660, AT5G23530, AT3G48700, AT1G49640, AT3G02410	1384	23	18499	2.90572	1	0.992217	0.969228
GO:0009058	biosynthetic process	13	0.675325	0.0827343	AT1G08990, AT4G23600, AT1G18870, AT2G36690, AT3G57010, AT1G55810, AT5G13930, AT1G74000, AT2G41290, AT1G74010, AT5G65800, AT4G17360, AT1G62800	1384	103	18499	1.68701	1	0.949684	0.92768
GO:0009247	glycolipid biosynthetic process	3	0.155844	0.0911813	AT4G33030, AT2G11810, AT5G20410	1384	7	18499	5.72843	1	0.993784	0.970759
GO:0009407	toxin catabolic process	9	0.467532	0.0195069	AT1G10370, AT2G29490, AT1G17190, AT1G17180, AT1G17170, AT5G17220, AT1G49860, AT1G78340, AT2G29440	1384	46	18499	2.61515	1	0.438499	0.428339
GO:0009556	microsporogenesis	6	0.311688	0.0693339	AT3G44540, AT1G34210, AT3G44560, AT3G44550, AT1G71830, AT5G18700	1384	30	18499	2.67327	1	0.8599	0.839976
GO:0009607	response to biotic stimulus	9	0.467532	0.0132039	AT4G23680, AT1G35260, AT1G70880, AT2G01530, AT1G70890, AT1G42560, AT5G65970, AT2G39200, AT2G44110	1384	43	18499	2.7976	0.999999	0.347488	0.339437
GO:0009611	response to wounding	32	1.66234	7.60727e-05	AT3G29035, AT1G09340, AT1G61120, AT5G42650, AT2G34810, AT4G23600, AT5G63450, AT3G53260, AT1G65060, AT5G47240, AT4G24350, AT2G38870, AT1G76930, AT3G44540, AT5G63970, AT3G11480, AT5G07700, AT2G02990, AT1G76690, AT4G32570, AT4G28680, AT4G22880, AT5G24090, AT5G13930, AT5G07690, AT5G53750, AT3G44550, AT1G51680, AT1G76680, AT3G15356, AT2G26690, AT4G12030	1384	199	18499	2.14936	0.078877	0.00586303	0.00572719
GO:0009624	response to nematode	13	0.675325	0.00843209	AT1G64780, AT1G59740, AT5G17520, AT5G27350, AT4G24260, AT1G72140, AT3G43790, AT5G04770, AT2G47260, AT5G13580, AT4G32650, AT1G60960, AT2G21050	1384	74	18499	2.34814	0.999893	0.252729	0.246873
GO:0009627	systemic acquired resistance	10	0.519481	0.00279784	AT2G23620, AT1G55490, AT1G29660, AT3G05180, AT2G40690, AT2G23560, AT3G01420, AT4G12470, AT1G02860, AT3G04720	1384	41	18499	3.26008	0.951486	0.104099	0.101687
GO:0009636	response to toxic substance	13	0.675325	0.00163731	AT1G10370, AT2G29490, AT5G17220, AT2G36750, AT2G37770, AT2G15490, AT1G17180, AT1G17170, AT1G49860, AT5G35750, AT1G78340, AT3G50740, AT2G29440	1384	61	18499	2.84856	0.829624	0.0654318	0.0639158
GO:0009651	response to salt stress	49	2.54545	0.0274098	AT3G49580, AT1G10370, AT5G50950, AT3G21370, AT1G56650, AT2G38750, AT4G19810, AT1G51470, AT5G35750, AT2G47460, AT3G02140, AT3G05890, AT5G25980, AT5G24090, AT3G04720, AT3G17510, AT3G60140, AT4G10310, AT3G44550, AT1G47600, AT3G09260, AT1G08910, AT2G42540, AT5G17310, AT5G63650, AT3G57180, AT1G18710, AT5G55580, AT3G44540, AT1G16060, AT5G10230, AT2G38380, AT3G16350, AT5G44610, AT1G47510, AT4G12480, AT5…	1384	484	18499	1.3532	1	0.563989	0.550921
GO:0009664	plant-type cell wall organization	21	1.09091	9.98909e-06	AT1G62980, AT5G22410, AT4G28250, AT2G34060, AT5G64100, AT1G30870, AT5G64120, AT2G37640, AT4G26010, AT5G42180, AT1G76930, AT5G56320, AT5G06640, AT2G24800, AT1G05240, AT4G33420, AT3G29030, AT4G11290, AT5G06630, AT5G39580, AT1G23720	1384	91	18499	3.08454	0.0107303	0.00153975	0.00150407
GO:0009718	anthocyanin-containing compound biosynthetic process	8	0.415584	0.00029058	AT1G56650, AT4G14090, AT2G02990, AT3G29590, AT5G42800, AT4G22880, AT3G25710, AT5G54060	1384	19	18499	5.62793	0.269387	0.0156768	0.0153136
GO:0009725	response to hormone	6	0.311688	0.0778127	AT2G44460, AT3G60140, AT3G21370, AT1G51470, AT1G47600, AT1G66280	1384	31	18499	2.58703	1	0.922636	0.901259
GO:0009733	response to auxin	43	2.23377	2.73839e-05	AT2G04160, AT5G18020, AT3G55120, AT4G34810, AT1G56650, AT4G32810, AT1G29450, AT3G01220, AT3G03840, AT3G61900, AT1G29500, AT3G16350, AT3G11260, AT2G47260, AT5G07700, AT5G13360, AT1G47510, AT2G47460, AT2G46690, AT2G47000, AT4G33880, AT4G34770, AT4G31910, AT5G18030, AT3G05630, AT1G28130, AT5G65980, AT1G19850, AT2G34680, AT5G63160, AT5G13930, AT2G45210, AT4G12550, AT1G29510, AT3G47600, AT1G29430, AT5…	1384	290	18499	1.9819	0.0291419	0.00268061	0.0026185
GO:0009734	auxin-activated signaling pathway	22	1.14286	0.0462843	AT1G12110, AT5G18030, AT5G18020, AT1G29450, AT5G65980, AT1G19850, AT1G53700, AT2G18120, AT3G20840, AT1G69160, AT2G46530, AT2G45210, AT1G29500, AT1G29510, AT1G29430, AT2G26700, AT1G77690, AT5G57090, AT1G04250, AT2G46690, AT2G47000, AT2G21050	1384	190	18499	1.54768	1	0.742022	0.72483
GO:0009737	response to abscisic acid	40	2.07792	0.0447137	AT3G53420, AT4G23600, AT3G59220, AT5G16600, AT3G01420, AT3G02410, AT2G38750, AT1G13740, AT5G59320, AT1G76930, AT1G16060, AT2G37170, AT4G19810, AT5G60660, AT4G28080, AT5G35750, AT3G20470, AT1G47510, AT3G08040, AT5G45820, AT5G44610, AT1G69700, AT4G12480, AT1G05510, AT4G31910, AT5G44120, AT3G02140, AT2G38940, AT3G05890, AT5G25980, AT5G16770, AT4G22200, AT4G28520, AT1G73330, AT3G17510, AT3G47600, AT3…	1384	394	18499	1.35699	1	0.731002	0.714065
GO:0009739	response to gibberellin	15	0.779221	0.015275	AT1G15550, AT5G15230, AT2G31730, AT3G02885, AT5G65790, AT2G37640, AT4G36880, AT5G07690, AT1G74670, AT3G58070, AT3G16350, AT5G61420, AT5G44610, AT4G36410, AT5G37260	1384	99	18499	2.0252	1	0.383297	0.374416
GO:0009751	response to salicylic acid	18	0.935065	0.0716344	AT1G21910, AT5G44420, AT3G02885, AT5G65790, AT3G01420, AT5G63160, AT5G07690, AT1G76930, AT3G47600, AT3G48920, AT3G61250, AT5G03780, AT5G61420, AT3G20470, AT5G10280, AT1G76680, AT5G37260, AT1G02860	1384	155	18499	1.55222	1	0.868466	0.848344
GO:0009753	response to jasmonic acid	29	1.50649	1.2259e-05	AT5G59090, AT1G56650, AT1G61120, AT5G42650, AT2G34810, AT4G23600, AT1G18710, AT5G55120, AT1G76930, AT1G19570, AT4G19810, AT3G16350, AT5G07700, AT1G47510, AT1G21910, AT1G06160, AT5G44420, AT4G20860, AT4G22880, AT5G13930, AT5G07690, AT3G61250, AT3G47600, AT5G60890, AT5G61420, AT5G10280, AT2G26690, AT5G37260, AT4G12030	1384	156	18499	2.48477	0.0131525	0.00164068	0.00160267
GO:0009808	lignin metabolic process	4	0.207792	0.0677815	AT1G05240, AT5G64120, AT3G50740, AT5G66690	1384	13	18499	4.11272	1	0.858763	0.838866
GO:0009813	flavonoid biosynthetic process	34	1.76623	5.9358e-09	AT2G30150, AT3G55120, AT4G14090, AT2G36750, AT3G46700, AT3G46720, AT2G45400, AT5G37950, AT2G29730, AT4G34138, AT5G05860, AT2G47460, AT2G29710, AT5G17040, AT2G31790, AT4G09500, AT4G09820, AT2G16890, AT5G63580, AT5G66690, AT5G13930, AT1G22360, AT5G63600, AT2G15490, AT5G05270, AT2G22930, AT5G08640, AT1G22380, AT5G05890, AT1G17020, AT5G07990, AT1G05680, AT3G50740, AT3G63170	1384	145	18499	3.13417	6.41064e-06	2.13491e-06	2.08544e-06
GO:0009828	plant-type cell wall loosening	7	0.363636	0.0487489	AT1G62980, AT5G56320, AT3G45970, AT4G28250, AT4G17030, AT3G29030, AT2G37640	1384	36	18499	2.59901	1	0.742022	0.72483
GO:0009926	auxin polar transport	12	0.623377	0.00255525	AT5G13930, AT1G29500, AT1G29510, AT1G29430, AT4G32810, AT1G29450, AT1G77690, AT5G57090, AT5G65980, AT3G53480, AT2G47000, AT1G53700	1384	56	18499	2.86421	0.936911	0.0984684	0.0961869
GO:0009958	positive gravitropism	6	0.311688	0.0963484	AT5G47990, AT1G70560, AT5G57090, AT2G23050, AT5G64770, AT4G24670	1384	33	18499	2.43024	1	1	0.977737
GO:0009992	cellular water homeostasis	13	0.675325	9.26234e-06	AT2G36830, AT3G06100, AT4G19030, AT3G53420, AT5G47450, AT2G25810, AT2G37170, AT5G60660, AT3G16240, AT2G37180, AT1G73190, AT4G17340, AT5G18290	1384	37	18499	4.69628	0.0099535	0.00153975	0.00150407
GO:0010021	amylopectin biosynthetic process	3	0.155844	0.0911813	AT5G24300, AT1G11720, AT1G03310	1384	7	18499	5.72843	1	0.993784	0.970759
GO:0010087	phloem or xylem histogenesis	6	0.311688	0.0539958	AT4G31910, AT5G10250, AT5G35750, AT1G70560, AT2G32280, AT4G24670	1384	28	18499	2.86421	1	0.803553	0.784935
GO:0010106	cellular response to iron ion starvation	6	0.311688	0.000107223	AT5G04150, AT3G56980, AT5G03570, AT3G56970, AT3G18290, AT2G41240	1384	8	18499	10.0247	0.109353	0.00723087	0.00706333
GO:0010114	response to red light	11	0.571429	0.0101753	AT2G21650, AT4G36880, AT5G44110, AT3G27690, AT1G15550, AT5G38420, AT5G38410, AT5G38430, AT4G14690, AT2G37640, AT2G37770	1384	58	18499	2.53499	0.999984	0.296733	0.289858
GO:0010150	leaf senescence	12	0.623377	0.0814133	AT3G29035, AT1G20900, AT5G51720, AT1G32450, AT5G35750, AT1G17020, AT5G19700, AT5G44610, AT1G76680, AT5G13170, AT2G42540, AT2G39200	1384	92	18499	1.74343	1	0.947197	0.925251
GO:0010167	response to nitrate	6	0.311688	0.0209131	AT1G12110, AT1G32450, AT1G78050, AT1G08090, AT4G21680, AT1G02860	1384	22	18499	3.64536	1	0.460516	0.449846
GO:0010218	response to far red light	9	0.467532	0.0277029	AT5G44110, AT3G27690, AT5G38420, AT5G38410, AT5G38430, AT5G02200, AT1G02340, AT4G14690, AT2G37770	1384	49	18499	2.45504	1	0.563989	0.550921
GO:0010227	floral organ abscission	6	0.311688	0.0408369	AT2G23630, AT5G13790, AT1G71830, AT4G32980, AT3G56350, AT3G53040	1384	26	18499	3.08454	1	0.700308	0.684083
GO:0010344	seed oilbody biogenesis	4	0.207792	0.0116089	AT3G27660, AT5G40420, AT4G25140, AT1G05510	1384	7	18499	7.6379	0.999997	0.329632	0.321995
GO:0010345	suberin biosynthetic process	5	0.25974	0.0488263	AT5G41040, AT3G44540, AT3G44560, AT3G44550, AT5G13580	1384	19	18499	3.51746	1	0.742022	0.72483
GO:0010411	xyloglucan metabolic process	11	0.571429	0.00085052	AT4G30290, AT4G30280, AT1G70230, AT1G65310, AT4G25810, AT3G44990, AT1G11545, AT5G48070, AT2G36870, AT3G48580, AT1G14720	1384	42	18499	3.50071	0.601063	0.0399005	0.038976
GO:0010438	cellular response to sulfur starvation	5	0.25974	0.00452902	AT3G49580, AT5G07690, AT5G60890, AT5G48850, AT5G61420	1384	10	18499	6.68316	0.992572	0.148085	0.144654
GO:0010588	cotyledon vascular tissue pattern formation	5	0.25974	0.0408892	AT5G10250, AT1G70560, AT2G32280, AT2G21050, AT4G24670	1384	18	18499	3.71287	1	0.700308	0.684083
GO:0015977	carbon fixation	4	0.207792	0.0175515	AT5G38420, AT5G38410, AT3G14940, AT5G38430	1384	8	18499	6.68316	1	0.411696	0.402157
GO:0016036	cellular response to phosphate starvation	20	1.03896	0.000118198	AT3G05630, AT5G43370, AT3G04530, AT2G11810, AT5G43350, AT5G20150, AT2G27190, AT1G68740, AT5G15330, AT3G23430, AT3G25795, AT3G25710, AT1G13300, AT3G09922, AT1G73010, AT4G33030, AT2G02990, AT3G08040, AT5G20410, AT2G45130	1384	99	18499	2.70027	0.119849	0.00750213	0.0073283
GO:0016042	lipid catabolic process	19	0.987013	0.0618943	AT4G29800, AT5G14180, AT5G45670, AT5G45950, AT1G58520, AT5G14450, AT1G28570, AT4G37070, AT4G28780, AT4G01130, AT4G38530, AT1G74460, AT3G16370, AT1G28660, AT1G29660, AT1G20120, AT3G05180, AT3G48460, AT4G18970	1384	163	18499	1.55804	1	0.845367	0.82578
GO:0016132	brassinosteroid biosynthetic process	7	0.363636	0.0381612	AT4G31910, AT2G45400, AT4G36380, AT3G44970, AT5G36130, AT5G48000, AT1G12740	1384	34	18499	2.75189	1	0.697207	0.681053
GO:0019252	starch biosynthetic process	6	0.311688	0.0868212	AT5G51820, AT5G24300, AT1G32900, AT1G11720, AT1G03310, AT3G30720	1384	32	18499	2.50619	1	0.986106	0.963258
GO:0019430	removal of superoxide radicals	4	0.207792	0.0551093	AT1G56650, AT2G28190, AT3G56350, AT1G12520	1384	12	18499	4.45544	1	0.803553	0.784935
GO:0019762	glucosinolate catabolic process	8	0.415584	0.00687775	AT2G44460, AT3G60140, AT3G21370, AT1G51470, AT5G25980, AT1G47600, AT3G09260, AT1G66280	1384	31	18499	3.44938	0.999421	0.218268	0.21321
GO:0030001	metal ion transport	14	0.727273	0.059351	AT1G15960, AT4G19690, AT2G36950, AT3G53530, AT4G08570, AT1G12520, AT4G35060, AT5G63530, AT2G23150, AT5G19090, AT5G05365, AT3G08040, AT1G60960, AT2G28660	1384	108	18499	1.73267	1	0.831685	0.812415
GO:0030048	actin filament-based movement	5	0.25974	0.0488263	AT1G04160, AT4G27370, AT1G08730, AT2G20290, AT2G31900	1384	19	18499	3.51746	1	0.742022	0.72483
GO:0031408	oxylipin biosynthetic process	5	0.25974	0.0999676	AT5G42650, AT1G76690, AT1G76680, AT5G48880, AT3G01420	1384	24	18499	2.78465	1	1	0.977737
GO:0033306	phytol metabolic process	3	0.155844	0.0684463	AT3G02030, AT5G41120, AT1G54570	1384	6	18499	6.68316	1	0.858763	0.838866
GO:0034220	ion transmembrane transport	9	0.467532	0.000767389	AT2G36830, AT2G25810, AT2G37170, AT5G60660, AT3G53420, AT2G37180, AT1G73190, AT4G17340, AT5G18290	1384	28	18499	4.29632	0.563557	0.037637	0.0367649
GO:0034765	regulation of ion transmembrane transport	5	0.25974	0.0169678	AT1G19450, AT4G18290, AT4G32650, AT2G26650, AT4G22200	1384	14	18499	4.77369	1	0.40685	0.397424
GO:0035336	long-chain fatty-acyl-CoA metabolic process	3	0.155844	0.0911813	AT3G44540, AT3G44560, AT3G44550	1384	7	18499	5.72843	1	0.993784	0.970759
GO:0040008	regulation of growth	13	0.675325	0.0737016	AT5G18030, AT1G10370, AT5G15160, AT5G18020, AT1G53700, AT5G09970, AT2G45210, AT2G46840, AT1G16060, AT5G39860, AT1G26945, AT2G46690, AT5G14090	1384	101	18499	1.72042	1	0.8836	0.863128
GO:0042546	cell wall biogenesis	11	0.571429	0.0128499	AT4G30290, AT4G30280, AT1G65310, AT4G25810, AT3G44990, AT1G11545, AT5G48070, AT2G36870, AT3G48580, AT1G14720, AT2G33570	1384	60	18499	2.45049	0.999999	0.347488	0.339437
GO:0042631	cellular response to water deprivation	7	0.363636	0.0130852	AT1G09340, AT1G16370, AT1G79410, AT1G05680, AT5G05860, AT3G28270, AT5G24090	1384	27	18499	3.46534	0.999999	0.347488	0.339437
GO:0042744	hydrogen peroxide catabolic process	26	1.35065	4.41863e-09	AT5G40150, AT3G28200, AT3G49960, AT5G64100, AT5G64120, AT4G08780, AT2G18980, AT4G26010, AT1G49570, AT2G24800, AT2G38380, AT5G58390, AT4G33420, AT4G11290, AT5G66390, AT5G22410, AT3G49110, AT2G34060, AT5G67400, AT1G30870, AT4G08770, AT5G42180, AT1G05240, AT5G06720, AT5G39580, AT1G77490	1384	89	18499	3.90477	4.77211e-06	2.13491e-06	2.08544e-06
GO:0044550	secondary metabolite biosynthetic process	18	0.935065	0.0429622	AT3G48280, AT5G47990, AT4G31940, AT3G26200, AT3G28740, AT3G26310, AT3G26330, AT3G26300, AT5G09970, AT4G37320, AT4G12310, AT4G12320, AT4G15765, AT5G07990, AT4G13290, AT2G25160, AT3G25180, AT2G45560	1384	145	18499	1.65927	1	0.724315	0.707533
GO:0045824	negative regulation of innate immune response	3	0.155844	0.0684463	AT1G20900, AT4G14465, AT3G04570	1384	6	18499	6.68316	1	0.858763	0.838866
GO:0046620	regulation of organ growth	4	0.207792	0.0551093	AT1G29500, AT1G29510, AT1G29430, AT1G29450	1384	12	18499	4.45544	1	0.803553	0.784935
GO:0048507	meristem development	4	0.207792	0.0677815	AT2G41510, AT4G17460, AT1G19850, AT5G63780	1384	13	18499	4.11272	1	0.858763	0.838866
GO:0048767	root hair elongation	8	0.415584	0.0387696	AT3G43960, AT2G37620, AT5G60660, AT4G15290, AT1G04160, AT2G26650, AT1G12950, AT2G47000	1384	43	18499	2.48676	1	0.697207	0.681053
GO:0048825	cotyledon development	8	0.415584	0.00824719	AT4G31820, AT2G26700, AT1G70560, AT2G32280, AT4G23750, AT5G53290, AT1G53700, AT4G24670	1384	32	18499	3.34158	0.999869	0.252729	0.246873
GO:0050826	response to freezing	5	0.25974	0.0670436	AT3G27660, AT5G40420, AT4G25140, AT2G42540, AT1G12860	1384	21	18499	3.18246	1	0.858763	0.838866
GO:0051603	proteolysis involved in cellular protein catabolic process	17	0.883117	0.00400764	AT3G02110, AT4G30610, AT5G23210, AT2G35770, AT3G19390, AT3G43960, AT3G63470, AT2G22920, AT2G34080, AT1G29110, AT2G27420, AT3G45010, AT5G50260, AT2G23000, AT3G48350, AT2G23010, AT1G73280	1384	103	18499	2.20609	0.986924	0.135133	0.132002
GO:0052696	flavonoid glucuronidation	23	1.19481	2.43515e-05	AT5G17040, AT2G31790, AT2G30150, AT4G14090, AT4G09500, AT2G16890, AT2G36750, AT5G66690, AT3G46700, AT1G22360, AT2G15490, AT3G46720, AT2G22930, AT5G37950, AT1G22380, AT5G05890, AT2G29730, AT4G34138, AT1G05680, AT5G05860, AT2G29710, AT3G50740, AT5G54060	1384	112	18499	2.74487	0.0259571	0.00262752	0.00256664
GO:0055072	iron ion homeostasis	14	0.727273	1.94717e-07	AT1G15960, AT5G51720, AT4G19690, AT3G56980, AT3G56970, AT5G19700, AT5G04150, AT3G56090, AT1G01580, AT2G23150, AT3G08040, AT1G60960, AT4G19680, AT2G41240	1384	32	18499	5.84777	0.000210272	5.25248e-05	5.13078e-05
GO:0055114	oxidation-reduction process	186	9.66234	1.30844e-17	AT5G21430, AT4G31940, AT4G25700, AT3G28200, AT5G18660, AT2G28190, AT5G42650, AT3G26300, AT3G56350, AT5G61290, AT3G14150, AT5G05580, AT4G12980, AT2G45400, AT5G38420, AT5G58390, AT1G76690, AT3G25180, AT2G29310, AT3G04000, AT1G60680, AT3G48280, AT4G04830, AT5G25620, AT1G59730, AT1G17650, AT5G48000, AT5G63580, AT1G30730, AT2G31250, AT1G12520, AT2G46740, AT4G13660, AT1G48130, AT3G56090, AT1G52990, AT3…	1384	1330	18499	1.86928	1.41312e-14	1.41181e-14	1.3791e-14
GO:0070417	cellular response to cold	7	0.363636	0.0252443	AT1G16390, AT1G79410, AT4G15920, AT5G35750, AT3G09260, AT4G12470, AT1G66280	1384	31	18499	3.0182	1	0.534091	0.521716
GO:0071215	cellular response to abscisic acid stimulus	6	0.311688	0.0613932	AT5G44120, AT5G28770, AT5G35750, AT1G05680, AT5G13170, AT4G28520	1384	29	18499	2.76545	1	0.845367	0.82578
GO:0071483	cellular response to blue light	3	0.155844	0.0684463	AT2G21320, AT3G22840, AT4G14690	1384	6	18499	6.68316	1	0.858763	0.838866
GO:0071555	cell wall organization	40	2.07792	0.00123082	AT1G60590, AT1G08990, AT3G06770, AT5G23870, AT2G32610, AT4G28250, AT1G11545, AT1G32860, AT5G66300, AT1G56710, AT2G36870, AT5G48070, AT1G64390, AT4G13410, AT4G30290, AT1G48100, AT5G03760, AT3G48580, AT3G15720, AT5G41900, AT1G65310, AT5G17780, AT4G15290, AT4G25810, AT1G62440, AT1G64760, AT5G14650, AT5G26670, AT1G24070, AT5G08370, AT4G24260, AT1G49490, AT1G14720, AT4G23990, AT2G33570, AT4G30280, AT2…	1384	314	18499	1.70272	0.73555	0.0531221	0.0518913
GO:0071577	zinc II ion transmembrane transport	5	0.25974	0.0337416	AT4G19690, AT1G60960, AT2G32270, AT1G05300, AT4G19680	1384	17	18499	3.93127	1	0.638723	0.623924
GO:0071732	cellular response to nitric oxide	5	0.25974	0.0575482	AT4G19690, AT5G55620, AT5G04950, AT3G08040, AT3G01420	1384	20	18499	3.34158	1	0.817034	0.798103
GO:0080003	thalianol metabolic process	3	0.155844	0.0159223	AT5G47990, AT5G48010, AT5G48000	1384	3	18499	13.3663	1	0.390458	0.381411
GO:0080022	primary root development	6	0.311688	0.0350698	AT1G12240, AT5G10250, AT1G70560, AT3G29030, AT1G13300, AT4G24670	1384	25	18499	3.20792	1	0.652419	0.637303
GO:0080167	response to karrikin	20	1.03896	0.00307527	AT1G10370, AT3G52360, AT3G55120, AT3G57520, AT4G27030, AT3G53260, AT3G22840, AT2G44460, AT2G47930, AT1G74670, AT5G05270, AT3G47600, AT5G57785, AT5G62210, AT5G08640, AT4G31870, AT1G05680, AT1G07440, AT1G06550, AT5G05600	1384	128	18499	2.08849	0.964078	0.110607	0.108045
GO:0080170	hydrogen peroxide transmembrane transport	4	0.207792	0.00371734	AT2G36830, AT5G60660, AT3G53420, AT3G26520	1384	5	18499	10.6931	0.982087	0.129388	0.12639
GO:1900865	chloroplast RNA modification	4	0.207792	0.0677815	AT1G47580, AT3G14330, AT3G22150, AT4G37380	1384	13	18499	4.11272	1	0.858763	0.838866
GO:1901657	glycosyl compound metabolic process	8	0.415584	0.00143345	AT2G44450, AT1G60260, AT1G60270, AT3G62750, AT3G62740, AT4G21760, AT1G61820, AT1G45191	1384	24	18499	4.45544	0.78759	0.0594882	0.0581099

## Sheet: Supplemental Data Set 3C
Supplemental Data Set 3. Genes deregulated in an RNA-seq analysis of api7-1 plants and gene ontology term enrichment analysis
Supplemental Data Set 3C. Gene ontology term enrichment analysis of genes downregulated in api7-1 plants
Term	Description	Count	%	p-value	Genes	List Total	Pop Hits	Pop Total	Fold Enrichment	Bonferroni	Benjamini	FDR
GO:0000209	protein polyubiquitination	21	0.666667	0.0686311	AT4G26400, AT3G02340, AT2G40830, AT1G32340, AT1G55530, AT1G65040, AT2G15580, AT4G23450, AT5G56340, AT5G60820, AT5G38895, AT1G75440, AT3G46620, AT5G20910, AT1G05880, AT5G01980, AT3G13430, AT5G59550, AT4G19670, AT1G26800, AT4G14220	2277	115	18499	1.48357	1	0.920517	0.891158
GO:0000302	response to reactive oxygen species	9	0.285714	0.0428821	AT4G23140, AT4G23150, AT4G17490, AT1G07890, AT2G01980, AT5G52310, AT4G18880, AT4G02380, AT3G56240	2277	33	18499	2.21571	1	0.689012	0.667037
GO:0000422	mitophagy	5	0.15873	0.0832569	AT3G56440, AT1G54210, AT2G40810, AT5G45900, AT3G19190	2277	14	18499	2.90153	1	1	0.96875
GO:0002229	defense response to oomycetes	11	0.349206	0.00625631	AT4G39950, AT4G02420, AT5G26920, AT3G59700, AT1G73805, AT5G24530, AT4G10500, AT1G56510, AT4G33430, AT4G24460, AT1G08720	2277	34	18499	2.62845	0.999921	0.15426	0.14934
GO:0002230	positive regulation of defense response to virus by host	3	0.0952381	0.0765926	AT5G43470, AT5G24590, AT5G14930	2277	4	18499	6.09321	1	0.993723	0.962029
GO:0002237	response to molecule of bacterial origin	11	0.349206	2.50371e-05	AT4G31800, AT5G26920, AT3G05010, AT1G80460, AT4G26070, AT1G80840, AT5G24590, AT4G23210, AT3G25070, AT2G25000, AT3G50930	2277	19	18499	4.70353	0.0370043	0.00157003	0.00151996
GO:0002239	response to oomycetes	5	0.15873	0.00278961	AT5G43470, AT5G24530, AT4G35985, AT3G44480, AT4G10500	2277	6	18499	6.77024	0.985109	0.0749708	0.0725797
GO:0006212	uracil catabolic process	3	0.0952381	0.0416739	AT5G12200, AT5G64370, AT3G17810	2277	3	18499	8.12429	1	0.689012	0.667037
GO:0006464	cellular protein modification process	12	0.380952	0.00735576	AT5G07470, AT2G38830, AT2G35635, AT5G13860, AT5G61640, AT3G09790, AT5G42300, AT4G05320, AT1G72280, AT4G02890, AT4G05050, AT3G17205	2277	40	18499	2.43729	0.999985	0.175721	0.170116
GO:0006465	signal peptide processing	9	0.285714	0.00617004	AT1G01650, AT2G22425, AT3G05230, AT5G27430, AT2G39960, AT2G03120, AT2G30440, AT1G52600, AT4G40042	2277	24	18499	3.04661	0.99991	0.15426	0.14934
GO:0006468	protein phosphorylation	205	6.50794	4.0784e-21	AT4G23240, AT4G02420, AT1G61480, AT1G14370, AT1G34300, AT1G34420, AT1G11300, AT1G51790, AT5G45800, AT5G38260, AT1G79680, AT4G23130, AT4G02410, AT2G13800, AT1G61370, AT3G51990, AT1G61490, AT2G35050, AT2G02800, AT4G35230, AT3G46930, AT2G17290, AT3G47580, AT5G38250, AT4G23140, AT4G23260, AT1G70530, AT1G67000, AT5G08160, AT5G16900, AT5G07070, AT1G29720, AT1G18160, AT5G02290, AT1G51890, AT5G38240, AT4…	2277	870	18499	1.91434	6.14207e-18	1.5345e-18	1.48556e-18
GO:0006470	protein dephosphorylation	27	0.857143	0.000236219	AT5G24940, AT4G33920, AT5G46410, AT2G35680, AT5G11860, AT5G06750, AT3G15260, AT4G26080, AT5G56610, AT1G07630, AT2G04550, AT4G18140, AT5G59220, AT4G28400, AT3G51370, AT3G55270, AT1G34750, AT4G11240, AT3G62260, AT5G10740, AT2G20630, AT1G78200, AT1G22280, AT2G29400, AT2G28890, AT5G57050, AT3G11410	2277	103	18499	2.12967	0.299379	0.00987527	0.00956031
GO:0006486	protein glycosylation	21	0.666667	0.000312777	AT1G80290, AT2G35610, AT3G55830, AT4G26940, AT5G19690, AT1G05170, AT1G34130, AT1G32210, AT5G58770, AT2G15390, AT1G77810, AT2G25300, AT1G27330, AT1G27350, AT5G62620, AT1G71220, AT3G45040, AT1G14080, AT1G49710, AT2G25110, AT2G47760	2277	72	18499	2.36958	0.375695	0.0123876	0.0119925
GO:0006487	protein N-linked glycosylation	13	0.412698	0.000636174	AT1G12990, AT4G21150, AT1G61790, AT3G27540, AT1G30000, AT1G32210, AT1G67490, AT2G41490, AT5G03080, AT1G49710, AT5G02410, AT2G45790, AT2G44660	2277	35	18499	3.01759	0.616488	0.0223467	0.021634
GO:0006511	ubiquitin-dependent protein catabolic process	38	1.20635	0.0951965	AT5G42790, AT1G56450, AT3G26340, AT5G53300, AT1G29150, AT4G05050, AT1G68050, AT1G47250, AT5G10790, AT1G75440, AT4G14800, AT3G17000, AT2G05840, AT3G09790, AT1G77000, AT5G58290, AT4G38630, AT4G23570, AT2G35635, AT5G23540, AT2G29070, AT4G05320, AT4G02890, AT3G60820, AT5G43190, AT4G24560, AT4G05460, AT2G22310, AT4G15420, AT4G29040, AT1G16470, AT1G20200, AT1G13060, AT3G08690, AT4G30640, AT4G15165, AT4…	2277	242	18499	1.27571	1	1	0.96875
GO:0006561	proline biosynthetic process	4	0.126984	0.0883997	AT1G79900, AT3G55610, AT1G26640, AT2G43000	2277	9	18499	3.61079	1	1	0.96875
GO:0006623	protein targeting to vacuole	12	0.380952	0.00482299	AT3G54300, AT3G47810, AT3G47700, AT1G30900, AT1G26670, AT2G36900, AT2G14740, AT2G34940, AT2G14720, AT4G23700, AT2G37680, AT4G20110	2277	38	18499	2.56556	0.999311	0.127344	0.123282
GO:0006664	glycolipid metabolic process	4	0.126984	0.0883997	AT3G61280, AT5G23850, AT3G61270, AT1G07220	2277	9	18499	3.61079	1	1	0.96875
GO:0006777	Mo-molybdopterin cofactor biosynthetic process	4	0.126984	0.064686	AT5G55130, AT5G20990, AT4G10100, AT2G31955	2277	8	18499	4.06214	1	0.895327	0.866772
GO:0006816	calcium ion transport	10	0.31746	0.0126766	AT5G11210, AT3G07520, AT1G10130, AT5G53130, AT5G48410, AT5G48400, AT4G08230, AT2G29110, AT2G29120, AT2G29100	2277	32	18499	2.53884	1	0.274642	0.265882
GO:0006874	cellular calcium ion homeostasis	9	0.285714	0.0303655	AT5G11210, AT3G07520, AT1G10130, AT3G51860, AT5G48410, AT5G48400, AT2G29110, AT2G29120, AT2G29100	2277	31	18499	2.35866	1	0.537647	0.5205
GO:0006886	intracellular protein transport	44	1.39683	7.06095e-05	AT4G24550, AT2G03290, AT4G23460, AT1G14010, AT3G09740, AT1G21900, AT2G14740, AT5G46630, AT5G16880, AT3G07680, AT1G10730, AT4G20110, AT3G59020, AT2G17790, AT4G27100, AT1G11905, AT1G20350, AT1G26670, AT1G76970, AT1G26690, AT3G17340, AT4G01810, AT1G23900, AT3G11820, AT4G16143, AT3G02460, AT5G43670, AT3G49350, AT3G06540, AT3G51890, AT4G24920, AT3G60540, AT3G05710, AT3G59570, AT4G29950, AT2G43490, AT5…	2277	193	18499	1.85217	0.100883	0.00342798	0.00331865
GO:0006887	exocytosis	15	0.47619	0.010858	AT2G32670, AT1G54090, AT3G54300, AT2G33110, AT3G29400, AT5G22360, AT5G61010, AT3G14090, AT5G58430, AT5G13990, AT5G03540, AT1G07000, AT3G52400, AT1G04750, AT3G11820	2277	59	18499	2.0655	1	0.247596	0.239699
GO:0006897	endocytosis	14	0.444444	0.0627195	AT3G58600, AT1G60490, AT4G25940, AT5G46630, AT1G14910, AT5G25250, AT4G28540, AT5G05190, AT5G10410, AT1G03900, AT5G35200, AT3G15920, AT1G04440, AT4G16144	2277	67	18499	1.69761	1	0.895327	0.866772
GO:0006904	vesicle docking involved in exocytosis	10	0.31746	0.0660341	AT4G12120, AT1G54090, AT3G29400, AT5G58430, AT1G12360, AT5G13990, AT5G03540, AT5G61010, AT1G07000, AT3G14090	2277	42	18499	1.93435	1	0.895327	0.866772
GO:0006906	vesicle fusion	10	0.31746	0.0943835	AT2G32670, AT3G54300, AT2G33110, AT3G09740, AT5G22360, AT3G61450, AT3G52400, AT3G05710, AT1G04750, AT3G11820	2277	45	18499	1.8054	1	1	0.96875
GO:0006914	autophagy	15	0.47619	0.00114534	AT3G56440, AT2G40810, AT4G00355, AT5G54730, AT3G61960, AT4G21980, AT1G62040, AT3G07525, AT4G29950, AT4G24690, AT1G54210, AT3G15580, AT3G18770, AT2G05630, AT5G45900	2277	47	18499	2.59286	0.821983	0.0366753	0.0355056
GO:0006952	defense response	180	5.71429	3.27665e-26	AT5G45000, AT2G31880, AT4G24970, AT1G72930, AT4G02380, AT1G74710, AT5G05190, AT1G13960, AT3G44400, AT4G16940, AT2G45760, AT1G72890, AT3G20600, AT4G11890, AT2G17060, AT4G36150, AT4G15975, AT3G44480, AT1G79680, AT5G25910, AT3G45290, AT3G11840, AT4G23130, AT5G18370, AT5G43470, AT1G33560, AT2G14610, AT1G31540, AT1G70520, AT3G55270, AT2G16870, AT1G72940, AT1G11310, AT5G45250, AT1G23130, AT4G39950, AT3…	2277	658	18499	2.22245	4.93463e-23	1.64378e-23	1.59136e-23
GO:0006979	response to oxidative stress	61	1.93651	3.58982e-05	AT4G25100, AT1G63460, AT4G02380, AT5G19875, AT3G14430, AT4G11850, AT2G01980, AT5G05340, AT5G50350, AT1G69720, AT2G48150, AT3G63080, AT3G03670, AT1G09210, AT1G32230, AT1G56340, AT4G17070, AT5G26030, AT5G64110, AT1G27730, AT3G46930, AT1G02930, AT3G45640, AT1G27330, AT5G61640, AT2G40000, AT1G45145, AT4G11280, AT1G20620, AT4G37530, AT3G46090, AT4G26970, AT3G28340, AT1G13340, AT1G14870, AT3G49120, AT5…	2277	291	18499	1.70303	0.0526282	0.00203852	0.0019735
GO:0006995	cellular response to nitrogen starvation	8	0.253968	0.0273724	AT3G15580, AT2G05630, AT5G45900, AT4G21980, AT1G62040, AT3G07525, AT1G20620, AT5G45380	2277	25	18499	2.59977	1	0.490422	0.47478
GO:0007034	vacuolar transport	8	0.253968	0.0173683	AT3G47810, AT5G45130, AT1G73030, AT4G29160, AT5G63880, AT3G15920, AT3G05710, AT3G10640	2277	23	18499	2.82584	1	0.353234	0.341968
GO:0007165	signal transduction	129	4.09524	7.83592e-21	AT5G45000, AT4G02660, AT5G42010, AT1G72930, AT1G29230, AT1G10210, AT1G33610, AT2G33020, AT3G44400, AT4G16940, AT1G72890, AT2G17060, AT4G36150, AT3G44480, AT1G51270, AT3G15920, AT5G58670, AT5G25910, AT5G18370, AT1G10340, AT5G42140, AT1G31540, AT2G16870, AT1G72940, AT5G45250, AT2G20570, AT3G44630, AT4G19925, AT1G01560, AT4G13820, AT1G74200, AT4G19520, AT3G47220, AT5G18360, AT1G59580, AT3G25510, AT2…	2277	450	18499	2.32896	1.18009e-17	2.35861e-18	2.28339e-18
GO:0007166	cell surface receptor signaling pathway	19	0.603175	1.02529e-05	AT3G57640, AT1G16130, AT1G66880, AT1G16110, AT1G65250, AT5G66790, AT1G65190, AT1G21270, AT1G18390, AT1G16160, AT1G21240, AT1G16150, AT1G21250, AT1G16260, AT1G69730, AT1G21245, AT1G79670, AT2G23450, AT1G79680	2277	49	18499	3.15023	0.0153223	0.000812136	0.000786234
GO:0008219	cell death	13	0.412698	0.00561545	AT2G13790, AT1G28380, AT1G11310, AT1G64280, AT4G14400, AT5G43940, AT2G26300, AT4G33430, AT3G50930, AT2G26560, AT5G51290, AT1G08720, AT3G45290	2277	44	18499	2.40036	0.999793	0.145711	0.141064
GO:0009058	biosynthetic process	19	0.603175	0.0779312	AT5G19550, AT5G18480, AT1G62730, AT3G51430, AT5G19485, AT3G51450, AT3G51440, AT3G27610, AT1G31220, AT1G74710, AT4G37770, AT1G17290, AT2G24850, AT1G73740, AT1G01480, AT1G72330, AT1G77130, AT4G11280, AT1G03210	2277	103	18499	1.49865	1	1	0.96875
GO:0009251	glucan catabolic process	4	0.126984	0.064686	AT3G47010, AT5G20950, AT3G47040, AT3G47050	2277	8	18499	4.06214	1	0.895327	0.866772
GO:0009408	response to heat	31	0.984127	0.0118888	AT3G08970, AT3G09440, AT5G22060, AT3G24320, AT2G38470, AT1G16970, AT3G24500, AT1G09080, AT4G36990, AT5G57560, AT5G02490, AT4G26080, AT5G28540, AT5G59820, AT4G38630, AT3G53990, AT3G08720, AT5G42020, AT3G10800, AT1G07890, AT5G52640, AT1G32330, AT1G64280, AT2G43130, AT1G28520, AT4G29040, AT5G05410, AT2G26150, AT5G57050, AT3G61190, AT4G11260	2277	160	18499	1.57408	1	0.263128	0.254736
GO:0009409	response to cold	51	1.61905	0.0145955	AT4G02380, AT1G74710, AT2G38470, AT4G01370, AT4G11890, AT3G17020, AT4G26080, AT4G39260, AT4G35985, AT1G46768, AT5G58670, AT3G04880, AT3G50260, AT3G08720, AT4G21150, AT5G52300, AT2G17840, AT3G22330, AT1G17610, AT1G27730, AT2G21660, AT3G45640, AT3G61190, AT3G11410, AT1G20620, AT5G42900, AT4G02520, AT5G67450, AT5G40010, AT1G09560, AT4G24190, AT5G52310, AT4G08500, AT4G25480, AT3G57260, AT2G30250, AT4…	2277	299	18499	1.38575	1	0.309383	0.299516
GO:0009414	response to water deprivation	60	1.90476	1.91195e-05	AT1G05180, AT2G47190, AT4G02380, AT1G30100, AT2G38470, AT4G11890, AT3G46620, AT1G46768, AT5G58670, AT1G08720, AT5G40280, AT1G33560, AT1G32230, AT5G52300, AT2G14610, AT3G18490, AT2G17840, AT3G19580, AT5G67300, AT4G23450, AT4G39950, AT1G27730, AT3G46930, AT2G21660, AT1G02930, AT3G14440, AT4G34100, AT3G11410, AT4G02200, AT3G09940, AT4G39090, AT5G40010, AT4G24190, AT5G52310, AT5G66400, AT5G26340, AT4…	2277	279	18499	1.74716	0.0283836	0.00137023	0.00132653
GO:0009611	response to wounding	40	1.26984	0.00207767	AT5G52310, AT3G51440, AT4G02380, AT4G08500, AT1G73500, AT2G14580, AT5G46050, AT2G21970, AT3G14050, AT5G08790, AT1G01470, AT2G47800, AT1G76650, AT5G59820, AT2G46370, AT1G80840, AT1G05630, AT2G27690, AT1G20510, AT3G17800, AT1G79380, AT5G20230, AT5G43470, AT5G50200, AT3G51450, AT1G72920, AT1G71697, AT1G64280, AT1G27730, AT1G19180, AT1G51760, AT2G24850, AT3G45640, AT5G06320, AT1G01140, AT5G54640, AT4…	2277	199	18499	1.63302	0.95638	0.0613117	0.0593562
GO:0009612	response to mechanical stimulus	6	0.190476	0.00230277	AT5G57560, AT5G61210, AT1G54990, AT2G41100, AT5G37780, AT4G11280	2277	9	18499	5.41619	0.968944	0.0653899	0.0633044
GO:0009615	response to virus	13	0.412698	0.00237084	AT3G51430, AT1G14790, AT3G51450, AT5G44870, AT3G09440, AT3G51440, AT5G24590, AT2G43570, AT4G14400, AT5G02490, AT1G21250, AT1G75040, AT4G13350	2277	40	18499	2.64039	0.971977	0.0660762	0.0639688
GO:0009617	response to bacterium	36	1.14286	6.49819e-09	AT5G26920, AT1G73805, AT1G80460, AT3G52430, AT4G10500, AT1G33950, AT3G57240, AT1G33970, AT1G74710, AT2G14580, AT3G44300, AT4G14400, AT4G34390, AT5G02490, AT2G26440, AT1G79680, AT3G50930, AT1G08720, AT3G50480, AT3G50260, AT3G09830, AT5G24530, AT3G22231, AT1G33960, AT3G28930, AT1G64280, AT4G39950, AT3G45640, AT5G06320, AT4G21610, AT5G54640, AT1G18570, AT5G10380, AT2G32800, AT4G19660, AT2G46440	2277	102	18499	2.8674	9.78623e-06	1.22247e-06	1.18348e-06
GO:0009620	response to fungus	29	0.920635	8.98805e-09	AT3G50470, AT5G26920, AT3G51440, AT4G10500, AT4G02380, AT1G73500, AT5G05190, AT4G01370, AT5G08790, AT3G16030, AT3G06380, AT3G11820, AT1G79680, AT5G38280, AT1G08720, AT3G50480, AT3G10985, AT3G51430, AT5G24530, AT3G51450, AT3G25780, AT3G22231, AT1G11310, AT1G53320, AT2G01650, AT3G06490, AT1G79670, AT4G19660, AT2G46440	2277	72	18499	3.27228	1.35359e-05	1.3527e-06	1.30956e-06
GO:0009625	response to insect	7	0.222222	0.0913592	AT4G39950, AT3G52430, AT1G18570, AT1G74080, AT4G02380, AT4G19840, AT1G64280	2277	26	18499	2.18731	1	1	0.96875
GO:0009626	plant-type hypersensitive response	37	1.1746	1.97005e-14	AT3G50470, AT5G26920, AT1G73805, AT3G48090, AT1G08450, AT5G20480, AT3G52430, AT5G44870, AT4G24290, AT1G28380, AT3G20600, AT1G22070, AT5G13320, AT1G19250, AT4G12720, AT1G71220, AT1G02120, AT2G01180, AT3G50930, AT2G26560, AT3G50480, AT5G43470, AT1G33560, AT1G29340, AT3G21220, AT4G23210, AT5G45250, AT1G64280, AT3G45640, AT5G64930, AT4G38360, AT1G51660, AT4G36280, AT3G46530, AT3G07040, AT2G47130, AT3…	2277	74	18499	4.06214	2.95943e-11	4.94154e-12	4.78394e-12
GO:0009627	systemic acquired resistance	21	0.666667	1.1871e-08	AT5G45110, AT3G48090, AT4G23170, AT1G59870, AT3G52430, AT2G14610, AT3G18490, AT1G74710, AT1G64280, AT2G18660, AT3G57260, AT2G43570, AT5G10760, AT1G19250, AT5G64930, AT3G12250, AT5G03350, AT3G07690, AT1G75040, AT2G46370, AT4G19660	2277	41	18499	4.16122	1.78775e-05	1.48882e-06	1.44133e-06
GO:0009651	response to salt stress	88	2.79365	0.000161203	AT5G24540, AT2G47190, AT5G22360, AT1G56450, AT1G59960, AT5G63110, AT1G73500, AT1G28380, AT2G38470, AT4G01370, AT4G11890, AT1G02500, AT5G38940, AT2G01980, AT4G39260, AT4G35985, AT3G48680, AT5G58670, AT3G08720, AT5G27600, AT1G09210, AT1G32230, AT1G56340, AT5G17640, AT1G55450, AT5G52300, AT2G17840, AT2G13560, AT3G55270, AT2G36460, AT5G67300, AT3G56240, AT4G23650, AT1G27730, AT2G15390, AT3G46930, AT2…	2277	484	18499	1.47714	0.215565	0.00693173	0.00671065
GO:0009723	response to ethylene	32	1.01587	7.60504e-05	AT5G24520, AT5G44790, AT2G47190, AT3G51440, AT4G02380, AT5G60360, AT3G24500, AT1G13960, AT2G14580, AT2G19560, AT5G39610, AT4G37260, AT3G11440, AT1G02120, AT5G59780, AT5G54190, AT1G08720, AT3G03450, AT3G50480, AT3G50060, AT3G51430, AT1G32230, AT3G51450, AT5G67300, AT3G20770, AT4G34460, AT1G70000, AT1G18570, AT3G06490, AT4G11280, AT5G20730, AT4G16110	2277	124	18499	2.09659	0.10822	0.00357674	0.00346267
GO:0009737	response to abscisic acid	86	2.73016	1.25313e-07	AT2G47190, AT5G63110, AT4G02380, AT4G21540, AT5G46050, AT4G01370, AT4G11890, AT5G61210, AT3G46620, AT4G26080, AT4G39260, AT3G48680, AT5G58670, AT5G40280, AT3G55830, AT5G17640, AT5G52300, AT3G18490, AT2G17840, AT3G19580, AT5G15860, AT5G67300, AT1G65690, AT4G23450, AT1G27730, AT4G35230, AT1G01560, AT3G46930, AT2G17290, AT1G70000, AT4G35310, AT3G15730, AT3G11410, AT1G43910, AT2G35940, AT4G23260, AT1…	2277	394	18499	1.77332	0.000188703	1.45074e-05	1.40447e-05
GO:0009738	abscisic acid-activated signaling pathway	45	1.42857	4.25096e-05	AT5G67450, AT5G26920, AT1G34120, AT1G50700, AT1G70810, AT5G63910, AT1G69270, AT3G20410, AT3G46620, AT2G01540, AT4G26080, AT4G21940, AT3G06380, AT4G32870, AT2G04550, AT2G26300, AT5G58670, AT1G08720, AT5G52900, AT3G55830, AT4G04695, AT1G66600, AT5G52300, AT2G17820, AT1G65790, AT3G19580, AT3G22231, AT5G67300, AT5G23580, AT5G66210, AT4G23650, AT4G34460, AT3G45640, AT2G17290, AT1G18890, AT5G37740, AT1…	2277	195	18499	1.87484	0.0620145	0.00228489	0.00221202
GO:0009751	response to salicylic acid	54	1.71429	1.06986e-12	AT4G23280, AT2G47190, AT3G52430, AT1G13960, AT2G14580, AT5G46050, AT4G09460, AT3G11280, AT4G14400, AT1G80840, AT3G11440, AT2G40750, AT1G79680, AT3G56400, AT4G23130, AT2G37710, AT3G50060, AT5G43470, AT4G23170, AT3G51430, AT5G24530, AT5G49570, AT5G67300, AT4G05320, AT2G17520, AT4G02890, AT1G21270, AT5G06320, AT1G70000, AT4G23810, AT2G40000, AT4G39030, AT3G61190, AT4G31800, AT1G57560, AT1G14790, AT3…	2277	155	18499	2.8304	1.61114e-09	2.30021e-10	2.22684e-10
GO:0009788	negative regulation of abscisic acid-activated signaling pathway	12	0.380952	0.00598491	AT4G34460, AT5G40280, AT4G33360, AT4G26080, AT2G39550, AT5G20910, AT5G08335, AT2G26300, AT5G59220, AT5G57050, AT3G11410, AT1G08720	2277	39	18499	2.49978	0.999881	0.152666	0.147797
GO:0009814	defense response, incompatible interaction	14	0.444444	1.76501e-06	AT4G26750, AT4G29810, AT3G05200, AT3G49530, AT5G27420, AT1G29340, AT3G21220, AT2G14580, AT3G20600, AT1G51660, AT4G26070, AT5G36970, AT3G46530, AT5G06960	2277	25	18499	4.5496	0.00265458	0.00017709	0.000171442
GO:0009816	defense response to bacterium, incompatible interaction	22	0.698413	8.42165e-09	AT3G05200, AT5G45110, AT5G26920, AT3G56710, AT1G32230, AT3G52430, AT5G52640, AT5G27420, AT2G17520, AT3G19190, AT3G20600, AT4G14400, AT1G28520, AT5G06320, AT4G22305, AT5G13320, AT4G11850, AT4G23810, AT2G40000, AT3G25070, AT4G16890, AT4G19660	2277	44	18499	4.06214	1.26829e-05	1.3527e-06	1.30956e-06
GO:0009817	defense response to fungus, incompatible interaction	17	0.539683	3.65715e-05	AT5G45110, AT1G59870, AT1G29340, AT1G56510, AT1G11310, AT3G60820, AT3G21630, AT3G20600, AT4G34460, AT5G38900, AT4G16950, AT1G02920, AT3G63420, AT3G44480, AT4G16860, AT4G19660, AT4G16990	2277	44	18499	3.13893	0.0535883	0.00203852	0.0019735
GO:0009862	systemic acquired resistance, salicylic acid mediated signaling pathway	8	0.253968	0.000659223	AT2G13810, AT3G56400, AT3G48090, AT1G22070, AT3G52430, AT1G64280, AT4G16890, AT4G01370	2277	14	18499	4.64245	0.62958	0.0225484	0.0218293
GO:0009863	salicylic acid mediated signaling pathway	13	0.412698	2.13082e-05	AT3G03450, AT5G01900, AT5G22570, AT3G22231, AT1G28480, AT5G05190, AT5G13320, AT5G36970, AT5G06960, AT3G52400, AT3G11820, AT3G50930, AT2G20370	2277	26	18499	4.06214	0.0315811	0.0013943	0.00134983
GO:0009867	jasmonic acid mediated signaling pathway	13	0.412698	0.0217942	AT3G03450, AT1G32230, AT3G23240, AT1G17440, AT1G28480, AT5G26170, AT1G19180, AT4G34460, AT5G64810, AT3G52400, AT3G11820, AT4G11260, AT1G79380	2277	52	18499	2.03107	1	0.429597	0.415895
GO:0009870	defense response signaling pathway, resistance gene-dependent	5	0.15873	0.0832569	AT1G19250, AT4G12720, AT3G18690, AT5G59890, AT5G45250	2277	14	18499	2.90153	1	1	0.96875
GO:0010053	root epidermal cell differentiation	9	0.285714	0.00165846	AT4G34580, AT3G27560, AT4G31170, AT5G65090, AT4G26270, AT3G13870, AT5G61070, AT1G67490, AT4G31230	2277	20	18499	3.65593	0.917891	0.0519995	0.050341
GO:0010112	regulation of systemic acquired resistance	5	0.15873	0.0501783	AT5G26920, AT1G73805, AT5G13320, AT1G02450, AT1G64280	2277	12	18499	3.38512	1	0.755184	0.731098
GO:0010119	regulation of stomatal movement	12	0.380952	0.0181912	AT4G33050, AT5G44790, AT2G21660, AT2G17290, AT4G26080, AT2G46370, AT2G26300, AT3G15730, AT4G23650, AT3G11820, AT3G11410, AT4G16110	2277	45	18499	2.16648	1	0.365037	0.353395
GO:0010120	camalexin biosynthetic process	5	0.15873	0.0260041	AT4G39950, AT3G45640, AT2G38470, AT1G73500, AT2G43000	2277	10	18499	4.06214	1	0.471521	0.456482
GO:0010150	leaf senescence	30	0.952381	9.65081e-07	AT2G13810, AT3G52430, AT5G51640, AT5G52310, AT4G10500, AT4G02380, AT1G70530, AT2G13790, AT1G73500, AT3G19190, AT2G35980, AT1G69490, AT2G22300, AT5G39610, AT5G45900, AT3G11340, AT5G59220, AT3G48140, AT2G43000, AT4G38630, AT5G52300, AT3G60800, AT2G43570, AT5G37600, AT5G64930, AT4G23810, AT4G16690, AT1G20780, AT3G10500, AT4G16110	2277	92	18499	2.64922	0.00145236	0.000103746	0.000100437
GO:0010193	response to ozone	15	0.47619	1.45557e-05	AT4G25100, AT3G05970, AT5G42380, AT5G27600, AT1G32230, AT5G24110, AT5G49570, AT1G70520, AT3G23400, AT3G02840, AT4G12720, AT4G23810, AT2G46370, AT4G11170, AT3G17800	2277	33	18499	3.69286	0.0216826	0.00109532	0.00106039
GO:0010200	response to chitin	68	2.15873	7.34612e-27	AT3G05200, AT5G47220, AT3G55980, AT5G62020, AT2G38470, AT3G46620, AT4G15975, AT4G17230, AT4G18880, AT3G53600, AT1G80840, AT5G25910, AT3G11840, AT3G56400, AT3G50260, AT4G26400, AT3G50060, AT4G28140, AT3G19580, AT4G29110, AT5G67300, AT4G26120, AT4G33050, AT1G27730, AT4G17500, AT2G23320, AT3G45640, AT5G38895, AT4G23810, AT5G10380, AT1G42990, AT3G44350, AT2G44840, AT2G26150, AT5G59450, AT1G34180, AT2…	2277	133	18499	4.15377	1.10633e-23	5.52796e-24	5.35165e-24
GO:0010204	defense response signaling pathway, resistance gene-independent	5	0.15873	0.0501783	AT1G08450, AT1G19250, AT5G20480, AT1G71220, AT3G25070	2277	12	18499	3.38512	1	0.755184	0.731098
GO:0010555	response to mannitol	4	0.126984	0.0883997	AT1G01140, AT4G34390, AT5G52310, AT5G20830	2277	9	18499	3.61079	1	1	0.96875
GO:0010942	positive regulation of cell death	4	0.126984	0.064686	AT3G20600, AT2G31880, AT3G48090, AT3G52430	2277	8	18499	4.06214	1	0.895327	0.866772
GO:0012501	programmed cell death	7	0.222222	0.0172045	AT4G23130, AT4G23280, AT4G23170, AT4G38360, AT1G32230, AT5G10380, AT1G16420	2277	18	18499	3.15944	1	0.353234	0.341968
GO:0015031	protein transport	80	2.53968	1.08174e-08	AT2G03290, AT4G26750, AT3G53120, AT4G21180, AT3G09840, AT2G38830, AT1G14010, AT1G21900, AT5G22360, AT2G19710, AT4G21980, AT4G24690, AT4G18800, AT1G30900, AT5G61210, AT1G43890, AT4G16144, AT1G09930, AT2G33110, AT3G06540, AT5G45130, AT2G36900, AT3G56440, AT1G12360, AT1G61250, AT4G00355, AT3G60540, AT5G55930, AT3G60860, AT1G17530, AT1G52315, AT4G34580, AT1G73030, AT4G29160, AT2G27600, AT1G54210, AT2…	2277	339	18499	1.91724	1.62909e-05	1.48002e-06	1.43282e-06
GO:0016192	vesicle-mediated transport	41	1.30159	5.22515e-05	AT4G24550, AT2G03290, AT4G23460, AT4G26750, AT1G14010, AT1G21900, AT5G22360, AT5G46630, AT3G07680, AT5G54730, AT1G10730, AT4G26550, AT2G33120, AT5G56230, AT3G22845, AT5G61210, AT1G26670, AT1G26690, AT1G23900, AT5G01640, AT3G11820, AT3G13720, AT3G60190, AT3G54300, AT2G36900, AT1G04260, AT5G63880, AT3G60860, AT1G29060, AT1G73030, AT4G29160, AT5G02040, AT2G27600, AT4G11740, AT3G62560, AT1G29330, AT3…	2277	173	18499	1.92541	0.0756761	0.00271167	0.00262519
GO:0016567	protein ubiquitination	68	2.15873	0.0691152	AT3G05200, AT3G54850, AT5G18340, AT1G05180, AT1G31350, AT5G22000, AT1G55000, AT5G53300, AT1G65040, AT1G56610, AT3G03740, AT4G03030, AT4G14365, AT4G36550, AT4G14400, AT5G55000, AT4G15975, AT3G06380, AT2G02350, AT1G63900, AT3G53410, AT5G65200, AT4G26120, AT5G67340, AT1G64280, AT4G21350, AT3G61390, AT5G57035, AT4G38940, AT3G47820, AT1G01680, AT5G65920, AT4G35070, AT5G02880, AT5G10380, AT3G08690, AT1…	2277	456	18499	1.21152	1	0.920517	0.891158
GO:0018105	peptidyl-serine phosphorylation	20	0.634921	0.000726688	AT4G04695, AT5G23580, AT5G66210, AT4G28540, AT2G30880, AT1G30640, AT1G48490, AT4G23650, AT1G50700, AT4G09570, AT3G20410, AT2G17290, AT5G09890, AT1G18890, AT4G21940, AT1G76040, AT5G12480, AT1G04440, AT1G08650, AT4G35310	2277	71	18499	2.28853	0.66539	0.0237754	0.0230171
GO:0018279	protein N-linked glycosylation via asparagine	5	0.15873	0.0260041	AT2G01720, AT5G19690, AT1G61790, AT1G34130, AT1G71220	2277	10	18499	4.06214	1	0.471521	0.456482
GO:0018401	peptidyl-proline hydroxylation to 4-hydroxy-L-proline	5	0.15873	0.0369624	AT3G06300, AT5G66060, AT2G17720, AT4G35810, AT3G28480	2277	11	18499	3.69286	1	0.632141	0.61198
GO:0019483	beta-alanine biosynthetic process	3	0.0952381	0.0416739	AT5G12200, AT5G64370, AT3G17810	2277	3	18499	8.12429	1	0.689012	0.667037
GO:0030001	metal ion transport	23	0.730159	0.0114091	AT1G63950, AT5G52710, AT5G52720, AT3G08650, AT5G52730, AT5G52740, AT5G52750, AT1G68100, AT3G56240, AT5G09690, AT5G26690, AT5G48290, AT3G07600, AT2G04305, AT1G22990, AT3G19640, AT4G38580, AT2G03620, AT5G52760, AT2G42950, AT5G52770, AT3G20180, AT5G60800	2277	108	18499	1.73017	1	0.256279	0.248106
GO:0030163	protein catabolic process	24	0.761905	0.00892926	AT3G51350, AT5G20000, AT5G42790, AT2G39710, AT5G43100, AT1G09100, AT3G51340, AT5G23540, AT3G51330, AT3G18490, AT1G29150, AT2G17760, AT3G02740, AT2G36670, AT1G49050, AT5G10760, AT1G44130, AT5G37540, AT4G29040, AT5G45900, AT5G58290, AT4G11260, AT1G05840, AT4G38630	2277	112	18499	1.74092	0.999999	0.209977	0.20328
GO:0030433	ER-associated ubiquitin-dependent protein catabolic process	10	0.31746	0.0063549	AT5G20000, AT1G09100, AT1G18260, AT4G29040, AT5G28540, AT2G03510, AT1G65040, AT1G30000, AT4G34100, AT5G35080	2277	29	18499	2.80148	0.999932	0.15426	0.14934
GO:0030968	endoplasmic reticulum unfolded protein response	10	0.31746	0.00010875	AT4G34460, AT3G10800, AT2G02810, AT1G27330, AT1G14360, AT1G27350, AT1G71220, AT1G42990, AT1G65040, AT2G17520	2277	18	18499	4.51349	0.151077	0.00495966	0.00480148
GO:0031338	regulation of vesicle fusion	7	0.222222	0.0451081	AT3G02460, AT3G49350, AT2G43490, AT5G54780, AT4G29950, AT3G59570, AT4G27100	2277	22	18499	2.585	1	0.692732	0.670638
GO:0031347	regulation of defense response	19	0.603175	0.000638477	AT3G56400, AT4G31800, AT4G02550, AT3G01080, AT3G07780, AT3G02150, AT4G03450, AT4G03460, AT1G19180, AT4G14400, AT4G35580, AT4G08480, AT4G19700, AT4G23810, AT4G35070, AT4G14390, AT2G40750, AT1G80840, AT2G25000	2277	65	18499	2.37479	0.617816	0.0223467	0.021634
GO:0031348	negative regulation of defense response	11	0.349206	0.000440267	AT3G09840, AT1G59870, AT3G52430, AT4G39030, AT2G46370, AT1G74710, AT1G11310, AT3G11820, AT5G48380, AT1G64280, AT3G61190	2277	25	18499	3.57469	0.484794	0.016565	0.0160367
GO:0033609	oxalate metabolic process	9	0.285714	0.0251615	AT5G26700, AT3G04200, AT5G38940, AT1G09560, AT5G39100, AT5G39120, AT5G39110, AT5G39130, AT5G39150	2277	30	18499	2.43729	1	0.471521	0.456482
GO:0034976	response to endoplasmic reticulum stress	10	0.31746	0.000298263	AT3G54960, AT5G42020, AT3G10800, AT4G08930, AT1G77510, AT4G24190, AT2G32920, AT2G47470, AT1G04980, AT1G21750	2277	20	18499	4.06214	0.361895	0.0121321	0.0117451
GO:0042391	regulation of membrane potential	8	0.253968	0.0576364	AT4G01010, AT1G01340, AT5G53130, AT3G17690, AT4G30560, AT2G46440, AT3G17700, AT2G46430	2277	29	18499	2.24118	1	0.85042	0.823297
GO:0042538	hyperosmotic salinity response	12	0.380952	0.0850699	AT3G03450, AT5G67450, AT3G55610, AT3G14440, AT1G18260, AT2G40950, AT5G52310, AT5G59820, AT3G19580, AT1G48605, AT2G43000, AT5G46050	2277	57	18499	1.71038	1	1	0.96875
GO:0042542	response to hydrogen peroxide	12	0.380952	0.061791	AT1G35580, AT5G39610, AT1G32230, AT2G01980, AT5G24110, AT4G26070, AT5G58940, AT4G23810, AT4G02380, AT5G05410, AT1G16420, AT2G26150	2277	54	18499	1.8054	1	0.895327	0.866772
GO:0042742	defense response to bacterium	104	3.30159	5.87015e-27	AT4G23240, AT4G02420, AT2G13810, AT1G74710, AT5G46050, AT3G20600, AT4G11530, AT1G80840, AT2G25110, AT3G50260, AT3G56400, AT4G23130, AT4G23250, AT1G33560, AT5G24530, AT5G67300, AT3G57330, AT5G45250, AT4G39950, AT3G46930, AT1G02930, AT5G06320, AT2G19190, AT4G39030, AT5G59890, AT4G16890, AT4G02520, AT4G23140, AT4G23260, AT5G48810, AT3G49120, AT1G73805, AT1G80460, AT5G46350, AT4G04540, AT5G46470, AT3…	2277	276	18499	3.06133	8.84044e-24	5.52796e-24	5.35165e-24
GO:0042787	protein ubiquitination involved in ubiquitin-dependent protein catabolic process	34	1.07937	0.00942099	AT2G40830, AT1G32340, AT1G65040, AT5G60820, AT3G46620, AT2G02870, AT5G01980, AT2G44410, AT4G19670, AT5G59140, AT4G14220, AT3G17205, AT5G45110, AT4G26400, AT3G02340, AT1G15670, AT1G19310, AT1G55530, AT4G27470, AT2G15580, AT4G23450, AT5G56340, AT5G38895, AT4G28270, AT1G54210, AT5G02880, AT5G20910, AT1G05880, AT3G13430, AT2G05330, AT5G59550, AT1G26800, AT4G19660, AT1G01640	2277	177	18499	1.5606	0.999999	0.218132	0.211175
GO:0043069	negative regulation of programmed cell death	9	0.285714	0.000149559	AT4G34180, AT4G19700, AT3G57330, AT3G52400, AT1G32210, AT5G47120, AT1G02120, AT3G11820, AT4G25110	2277	15	18499	4.87457	0.201686	0.0066202	0.00640906
GO:0045047	protein targeting to ER	4	0.126984	0.0444081	AT2G22425, AT2G39960, AT2G45790, AT4G40042	2277	7	18499	4.64245	1	0.689012	0.667037
GO:0045087	innate immune response	24	0.761905	2.4542e-06	AT4G29810, AT4G23570, AT1G61430, AT1G11330, AT1G61420, AT1G61480, AT1G61370, AT1G61460, AT1G66980, AT5G54610, AT4G08500, AT1G61490, AT2G33580, AT3G21630, AT1G11300, AT4G08480, AT2G21660, AT4G29040, AT3G16030, AT4G39260, AT4G39030, AT2G43850, AT2G23770, AT4G11260	2277	67	18499	2.91019	0.00368921	0.000230848	0.000223486
GO:0045454	cell redox homeostasis	33	1.04762	0.00213976	AT3G08710, AT5G40370, AT1G65980, AT5G18600, AT1G28480, AT5G63030, AT2G15570, AT4G10000, AT3G17240, AT5G39950, AT1G04980, AT5G20500, AT1G03850, AT3G54960, AT1G60420, AT4G08930, AT3G28850, AT4G26160, AT2G17420, AT5G13810, AT5G04260, AT5G39865, AT5G61440, AT1G76760, AT1G77510, AT4G15700, AT3G06050, AT2G32920, AT1G45145, AT2G47470, AT4G15660, AT1G77370, AT1G21750	2277	155	18499	1.72969	0.960281	0.0619296	0.0599544
GO:0045927	positive regulation of growth	4	0.126984	0.0444081	AT1G29400, AT1G67360, AT2G42890, AT3G05500	2277	7	18499	4.64245	1	0.689012	0.667037
GO:0046470	phosphatidylcholine metabolic process	5	0.15873	0.0369624	AT4G00240, AT4G11850, AT4G11840, AT3G15730, AT3G15820	2277	11	18499	3.69286	1	0.632141	0.61198
GO:0046686	response to cadmium ion	62	1.96825	0.00174053	AT4G25100, AT3G09840, AT2G47190, AT5G17330, AT1G56450, AT3G09440, AT5G60160, AT1G29150, AT4G22670, AT5G44070, AT4G31180, AT1G17290, AT1G02500, AT4G14800, AT3G14990, AT1G75040, AT3G13782, AT2G26560, AT5G42020, AT1G56340, AT2G36460, AT5G67300, AT3G56240, AT4G08790, AT4G24460, AT2G21660, AT1G02930, AT5G08300, AT4G29040, AT1G77510, AT1G70000, AT3G13235, AT1G13060, AT1G45145, AT2G47470, AT3G15730, AT1…	2277	342	18499	1.47282	0.927453	0.0528917	0.0512048
GO:0046777	protein autophosphorylation	37	1.1746	4.40665e-06	AT1G10470, AT3G59700, AT3G07980, AT1G16130, AT1G16670, AT1G70530, AT4G08500, AT1G73500, AT3G21630, AT1G50700, AT3G20410, AT4G21940, AT1G65800, AT1G08720, AT4G23250, AT4G04695, AT5G24430, AT1G65790, AT1G70520, AT5G66850, AT5G23580, AT2G17520, AT5G66210, AT4G28540, AT4G23650, AT4G09570, AT4G13000, AT2G17290, AT1G18890, AT4G28490, AT2G01450, AT1G76040, AT5G12480, AT1G08650, AT2G43850, AT4G32300, AT4…	2277	135	18499	2.22666	0.00661445	0.000368445	0.000356694
GO:0046916	cellular transition metal ion homeostasis	15	0.47619	0.0439832	AT1G63950, AT5G52710, AT5G52720, AT5G52730, AT5G52740, AT5G52750, AT5G26690, AT5G48290, AT3G07600, AT1G22990, AT4G38580, AT5G52760, AT5G52770, AT3G20180, AT5G60800	2277	70	18499	1.74092	1	0.689012	0.667037
GO:0048194	Golgi vesicle budding	8	0.253968	3.61533e-05	AT1G13210, AT3G13900, AT1G68710, AT1G26130, AT1G59820, AT3G25610, AT1G72700, AT1G17500	2277	10	18499	6.49943	0.0529922	0.00203852	0.0019735
GO:0048527	lateral root development	11	0.349206	0.0567379	AT4G34460, AT3G50060, AT2G46400, AT5G39610, AT3G54010, AT1G56010, AT4G31600, AT3G63420, AT1G13260, AT5G20730, AT5G13080	2277	47	18499	1.90143	1	0.845451	0.818487
GO:0048544	recognition of pollen	14	0.444444	0.000521124	AT4G21380, AT1G61430, AT1G11330, AT1G61420, AT1G61480, AT1G61370, AT1G61460, AT1G65790, AT1G34300, AT4G11900, AT1G61490, AT1G11300, AT2G19130, AT1G65800	2277	39	18499	2.91641	0.543888	0.0191291	0.018519
GO:0051603	proteolysis involved in cellular protein catabolic process	21	0.666667	0.0250574	AT3G49340, AT2G33530, AT4G39090, AT4G01610, AT1G56450, AT5G22000, AT1G61130, AT3G26340, AT5G60360, AT3G60820, AT2G21430, AT3G19400, AT3G45310, AT4G14800, AT1G02305, AT3G12230, AT1G28110, AT2G27920, AT1G13060, AT1G77000, AT3G12220	2277	103	18499	1.65641	1	0.471521	0.456482
GO:0051607	defense response to virus	17	0.539683	4.02751e-06	AT1G31290, AT1G31280, AT5G43470, AT3G49860, AT5G44870, AT1G69440, AT5G24590, AT5G46350, AT2G35980, AT5G06320, AT4G36280, AT3G20250, AT5G42950, AT5G03210, AT3G11650, AT3G11660, AT2G26560	2277	38	18499	3.63455	0.00604708	0.000356553	0.000345181
GO:0051707	response to other organism	19	0.603175	6.1758e-05	AT3G50480, AT3G50470, AT3G54950, AT5G43470, AT5G24540, AT1G33560, AT3G52430, AT3G51660, AT2G35980, AT3G02840, AT1G70690, AT5G61210, AT1G19250, AT5G64930, AT1G75040, AT1G75030, AT4G34135, AT3G13100, AT2G04450	2277	55	18499	2.80657	0.088816	0.00309819	0.00299938
GO:0051865	protein autoubiquitination	5	0.15873	0.0832569	AT3G46620, AT5G10380, AT5G59550, AT3G19910, AT3G11840	2277	14	18499	2.90153	1	1	0.96875
GO:0052033	pathogen-associated molecular pattern dependent induction by symbiont of host innate immune response	4	0.126984	0.0883997	AT3G09830, AT3G49120, AT3G62600, AT2G25110	2277	9	18499	3.61079	1	1	0.96875
GO:0052544	defense response by callose deposition in cell wall	6	0.190476	0.0382256	AT4G39950, AT3G54640, AT4G31500, AT1G59870, AT1G18570, AT5G44070	2277	16	18499	3.04661	1	0.646399	0.625783
GO:0061025	membrane fusion	9	0.285714	0.0988641	AT1G26670, AT2G36900, AT3G09740, AT5G61210, AT3G61450, AT3G52400, AT3G05710, AT4G04210, AT3G11820	2277	39	18499	1.87484	1	1	0.96875
GO:0070301	cellular response to hydrogen peroxide	4	0.126984	0.0883997	AT3G14990, AT5G46350, AT1G53280, AT1G34190	2277	9	18499	3.61079	1	1	0.96875
GO:0070588	calcium ion transmembrane transport	6	0.190476	0.0899518	AT3G22910, AT1G27770, AT4G29900, AT3G57330, AT3G63380, AT4G37640	2277	20	18499	2.43729	1	1	0.96875
GO:0071219	cellular response to molecule of bacterial origin	4	0.126984	0.0444081	AT5G26920, AT1G73805, AT2G23770, AT3G21630	2277	7	18499	4.64245	1	0.689012	0.667037
GO:0071230	cellular response to amino acid stimulus	7	0.222222	0.0225855	AT5G11210, AT3G07520, AT5G48410, AT5G48400, AT2G29110, AT2G29120, AT2G29100	2277	19	18499	2.99316	1	0.435785	0.421886
GO:0071323	cellular response to chitin	3	0.0952381	0.0765926	AT2G23770, AT2G33580, AT3G21630	2277	4	18499	6.09321	1	0.993723	0.962029
GO:0071446	cellular response to salicylic acid stimulus	7	0.222222	0.012774	AT4G14400, AT5G43470, AT5G03350, AT4G14390, AT2G32800, AT4G03450, AT4G03460	2277	17	18499	3.34529	1	0.274642	0.265882
GO:0071456	cellular response to hypoxia	13	0.412698	2.13082e-05	AT3G03670, AT5G26920, AT1G26380, AT1G57630, AT5G25250, AT5G57510, AT1G19250, AT5G13320, AT4G19520, AT2G23270, AT1G05880, AT2G26150, AT2G26560	2277	26	18499	4.06214	0.0315811	0.0013943	0.00134983
GO:0071712	ER-associated misfolded protein catabolic process	5	0.15873	0.0260041	AT4G28270, AT1G71220, AT1G19310, AT4G27470, AT2G44410	2277	10	18499	4.06214	1	0.471521	0.456482
GO:0072661	protein targeting to plasma membrane	3	0.0952381	0.0765926	AT1G04750, AT3G11820, AT2G33120	2277	4	18499	6.09321	1	0.993723	0.962029
GO:0080142	regulation of salicylic acid biosynthetic process	5	0.15873	0.00278961	AT5G26920, AT3G09830, AT1G73805, AT3G52430, AT5G03320	2277	6	18499	6.77024	0.985109	0.0749708	0.0725797
GO:0080167	response to karrikin	23	0.730159	0.0649579	AT5G18470, AT2G34650, AT1G33560, AT1G80460, AT1G31350, AT5G40780, AT3G09440, AT4G37290, AT2G16660, AT3G43800, AT2G47730, AT3G44720, AT2G40080, AT1G23010, AT1G71100, AT4G37370, AT3G44450, AT4G27280, AT5G64410, AT1G70000, AT4G33980, AT4G35110, AT5G42900	2277	128	18499	1.45983	1	0.895327	0.866772
GO:0090630	activation of GTPase activity	8	0.253968	0.0219794	AT3G02460, AT3G49350, AT2G43490, AT5G54780, AT5G54310, AT4G29950, AT3G59570, AT4G27100	2277	24	18499	2.7081	1	0.429597	0.415895
GO:0098542	defense response to other organism	10	0.31746	0.0660341	AT3G26210, AT4G37370, AT3G26230, AT3G26220, AT5G25120, AT1G13090, AT3G26180, AT3G26170, AT4G37400, AT5G10610	2277	42	18499	1.93435	1	0.895327	0.866772
GO:1900056	negative regulation of leaf senescence	5	0.15873	0.0369624	AT3G56400, AT2G20570, AT5G62620, AT2G40750, AT2G43000	2277	11	18499	3.69286	1	0.632141	0.61198
GO:1900057	positive regulation of leaf senescence	4	0.126984	0.064686	AT5G39610, AT3G04060, AT1G34180, AT5G14930	2277	8	18499	4.06214	1	0.895327	0.866772
GO:1900150	regulation of defense response to fungus	8	0.253968	0.000368734	AT3G28450, AT4G14400, AT3G22231, AT4G02380, AT3G05710, AT5G05190, AT1G13960, AT1G08720	2277	13	18499	4.99956	0.426167	0.0142294	0.0137755
GO:1900426	positive regulation of defense response to bacterium	8	0.253968	0.0017572	AT4G26750, AT4G14400, AT4G35580, AT1G73805, AT3G52430, AT4G36280, AT4G13040, AT5G14930	2277	16	18499	4.06214	0.929255	0.0528917	0.0512048
GO:1902074	response to salt	5	0.15873	0.0172587	AT5G39610, AT5G52310, AT5G24240, AT4G02380, AT1G65690	2277	9	18499	4.51349	1	0.353234	0.341968
GO:1902290	positive regulation of defense response to oomycetes	4	0.126984	0.0444081	AT4G14400, AT4G24970, AT3G22231, AT5G14930	2277	7	18499	4.64245	1	0.689012	0.667037
GO:2000031	regulation of salicylic acid mediated signaling pathway	9	0.285714	0.000722679	AT4G14400, AT3G52430, AT4G14390, AT5G67300, AT4G03450, AT4G03460, AT1G64280, AT4G19660, AT1G08720	2277	18	18499	4.06214	0.663362	0.0237754	0.0230171
